# Supplementary material
Source: publisher figshare collection journal article supplement (https://springernature.figshare.com/articles/dataset/_/22770782)
Supplement: Supplementary file 1 [file 1]

## Sheet: Acetaldehyde
DoY S1.1	Acetaldehyde S1.1	DoY S1.2	Acetaldehyde S1.2	DoY S1.3	Acetaldehyde S1.3	DoY S2.1	Acetaldehyde S2.1	DoY S2.2	Acetaldehyde S2.2	DoY S2.3	Acetaldehyde S2.3	DoY S3.1	Acetaldehyde S3.1	DoY S3.2	Acetaldehyde S3.2	DoY S3.3	Acetaldehyde S3.3	DoYS4.1	Acetaldehyde S4.1	DoY S4.2	Acetaldehyde S4.2	DoY S4.3	Acetaldehyde S4.3
	micromol/(m2 h)		micromol/(m2 h)		micromol/(m2 h)		micromol/(m2 h)		micromol/(m2 h)		micromol/(m2 h)		micromol/(m2 h)		micromol/(m2 h)		micromol/(m2 h)		micromol/(m2 h)		micromol/(m2 h)		micromol/(m2 h)
244.189	-0.02581	244.197	0.00513	244.205	0.06532	244.212	0.1002	244.22	-0.01156	244.228	-0.03244	244.236	-0.04434	244.244	-0.03714	244.154	-0.00687	244.162	-0.02311	244.17	-0.10811	244.178	0.05167
244.286	-0.04078	244.294	-0.07755	244.302	0.00131	244.31	-0.02019	244.318	0.02441	244.326	0.01296	244.333	0.07548	244.341	-0.00706	244.251	0.04778	244.259	0.09667	244.267	-0.01323	244.275	0.03847
244.384	0.04771	244.392	-0.04004	244.399	0.07508	244.407	0.04307	244.415	0.01792	244.423	0.00524	244.431	0.04497	244.439	0.02715	244.349	0.08626	244.357	0.10033	244.365	-0.01675	244.372	0.03455
244.481	0.02019	244.489	-0.01897	244.497	-0.0688	244.505	0.01067	244.513	0.0556	244.52	0.0042	244.528	0.02389	244.536	-0.001	244.446	-0.00513	244.454	0.02662	244.462	-0.04097	244.47	0.00944
244.579	-1.89727	244.587	-3.39094	244.594	-1.83663	244.602	-1.43569	244.61	64.1231	244.618	10.6484	244.626	-1.34991	244.633	-0.06555	244.544	0.05228	244.552	0.01663	244.56	0.03967	244.567	-0.03434
244.676	0.10054	244.684	0.08482	244.692	0.03555	244.7	0.08533	244.707	0.07826	244.715	0.06165	244.723	0.0922	244.731	0.04174	244.641	0.18317	244.649	0.17317	244.657	0.11393	244.665	0.07761
244.774	0.07673	244.781	0.0177	244.789	0.07742	244.797	0.27845	244.805	0.04374	244.813	-0.06389	244.82	0.06433	244.828	0.04621	244.739	0.04781	244.747	0.09877	244.754	0.08066	244.762	0.00467
244.871	0.05669	244.879	-0.02274	244.887	0.1117	244.894	0.06777	244.902	0.01969	244.91	0.06251	244.918	0.05767	244.926	0.01443	244.836	-0.01424	244.844	0.06074	244.852	0.10762	244.86	-0.03298
244.968		244.976		244.984		244.992		245		245.007		245.015		245.023		244.933	0.06559	244.941	0.02732	244.949	0.04248	244.957	0.08417
245.066		245.073		245.081		245.089		245.097		245.105		245.113		245.12		245.031		245.039		245.046		245.054
245.163	0.04612	245.171	0.01364	245.179	0.11278	245.187	0.22216	245.194	0.18639	245.202	-0.0952	245.21	0.0403	245.218	0.03584	245.128	0.03415	245.136	-0.0221	245.144	0.02138	245.152	0.01958
245.26	-0.01557	245.268	0.03218	245.276	0.00517	245.6	0.03549	245.604	0.000583292	245.608	0.03943	245.612	0.0403	245.616	0.04029	245.226	0.01859	245.233	0.02901	245.241	0.02643	245.249	0.0192
245.453	0.00277	245.592	0.01059	245.596	0.03013	245.711	0.00813	245.721	0.1081	245.732	-0.38448	245.746	-0.38071	245.757	0.07799	245.62	0.03389	245.624	0.00212	245.628	0.00804	245.5	0.01396
245.461	0.02283	245.689	-0.14045	245.7	-0.51619	245.716	0.00357	245.727	-0.16493	245.738	-0.34739	245.752	-0.34145	245.763	-0.13846	245.768	-0.2743	245.779	-0.461	245.79	0.25894	245.508	0.03099
245.469	-0.00516	245.694	0.27712	245.705	-0.17594	245.862	0.00223	245.869	0.00768	245.876	0.02017	245.883	0.01315	245.89	-0.01606	245.774	0.11029	245.784	-0.25745	245.795	0.01755	245.516	-0.00106
245.477	-0.00351	245.848	-0.03144	245.855	0.03689	245.951	0.03347	245.958	-0.04178	245.965		245.972		245.979		245.898	-0.00477	245.905	0.01185	245.912	0.11597	245.524	0.0325
245.485	0.02074	245.937	0.00552	245.944	0.00404	246.04		246.047		246.054		246.061		246.069		245.987		245.994		246.001		245.538	-0.17826
245.492	-0.00252	246.026		246.033		246.129	-0.00953	246.136	0.03638	246.143	-0.04386	246.151	-0.00504	246.158	0.01361	246.076		246.083		246.09		245.546	0.00411
245.588	-0.00147	246.115		246.122		246.218	-0.03995	246.225	-0.02548	246.233		246.24	-0.01058	246.247	0.03766	246.165	-0.01481	246.172	0.01104	246.179	-0.00839	245.554	0.04023
245.678	0.13982	246.204	0.00349	246.211	0.028	246.308		246.315		246.322		246.329	-0.01556	246.336		246.254		246.261		246.268		245.563	-0.02043
245.684	0.32725	246.293	0.01691	246.3		246.397	0.00848	246.404		246.411		246.418	-0.0487	246.425		246.343		246.35		246.357	0.01921	245.568	-0.000937122
245.841	-0.09918	246.382	-0.01987	246.39		246.486	0.02799	246.493	0.00746	246.5	0.03525	246.507	-0.03613	246.514	0.02383	246.432		246.439		246.447		245.574	-0.12789
245.93	0.00395	246.472	0.01408	246.479	-0.00919	246.575	0.00542	246.582	-0.01436	246.589		246.596	-0.00727	246.603	0.01224	246.521	-0.02376	246.529	0.00729	246.536	-0.01692	245.578	0.02053
246.019		246.561	0.01594	246.568	-0.00468	246.664	-0.00577	246.671		246.702		246.709		246.716		246.611		246.618	-0.00046735	246.625	0.00242	245.582	0.17765
246.108		246.65	0.03148	246.657		246.859	-0.00233	246.866	-0.02761	246.873	0.01404	246.884	-0.06272	246.891	-0.01158	246.723		246.731	-0.00575	246.738	0.01399	245.632	0.02451
246.197	-0.00471	246.815	-0.30882	246.848	-0.02763	246.962		246.969		246.976		246.987		246.994		246.898	-0.000949807	246.909	-0.02704	246.916	0.0237	245.8	0.992
246.286	0.01076	246.822	0.00148	246.951	0.01345	247.065		247.072		247.079		247.09		247.097		247.001		247.012		247.019		245.806	-0.16205
246.375	0.00763	246.841	0.03376	247.055		247.168	0.1841	247.176	0.22321	247.183	0.18412	247.193	0.14627	247.2	-0.07644	247.104		247.115		247.122		245.919	-0.064
246.464	-0.03347	246.944	0.05385	247.158	-0.13223	247.272	-0.4696	247.279	-0.27486	247.286	0.06334	247.296	0.01136	247.304	-0.06968	247.208	0.07631	247.218	-0.19444	247.225	0.02867	246.008
246.554	-0.02732	247.048		247.261	-0.01422	247.602	-0.00985	247.61	0.02781	247.617	0.01529	247.627	0.02145	247.634	0.07733	247.311	-0.041	247.321	0.01946	247.329	-0.11388	246.097
246.643	-0.01828	247.151	-1.07797	247.364	0.05236	247.706	0.04984	247.713	0.08201	247.72	-0.01056	247.731	0.09559	247.738	0.11461	247.642	0.08515	247.652	0.10561	247.659	0.12828	246.186	-0.02694
246.756	-0.05555	247.254	0.05541	247.592	0.0168	247.809	0.03377	247.816	-15.2308	247.823	-0.02744	247.834	-0.02547	247.841	0.07317	247.745	-0.02346	247.755	-0.0515	247.763	-0.01175	246.275
246.801	0.28046	247.357	-0.06813	247.695	-0.01816	247.912	0.01839	247.919	-0.04039	247.926	0.06737	247.937	0.00357	247.944	0.01733	247.848	0.00933	247.859	0.13326	247.866	-0.02353	246.365
246.808	-0.05802	247.585	-0.02197	247.798	0.02163	248.015		248.022		248.029		248.04		248.047		247.951	0.03155	247.962		247.969		246.454	-0.0044
246.834	-0.04472	247.688	0.04995	247.901	-0.04054	248.118		248.125	-0.02753	248.132	-0.07751	248.143	0.04072	248.15	0.02497	248.054		248.065		248.072		246.543	0.03516
246.937	-0.03051	247.791	-1.45104	248.004		248.221	0.00891	248.229	2.62465	248.236	0.33532	248.246	0.35152	248.253	3.6354	248.157	0.085	248.168	0.02939	248.175	-0.05303	246.632	0.000186416
247.04		247.894	0.03557	248.108		248.325	-0.01407	248.332	-0.0423	248.339	0.04069	248.35	0.02862	248.357	0.04841	248.261	3.74439	248.271	0.94138	248.278	-0.42437	246.745	-0.00403
247.144	-0.70242	247.997		248.211	0.02627	248.428		248.435		248.442		267.796	0.11233	267.803	0.01043	248.364	-0.01836	248.374	-0.02425	248.382	0.02954	246.923	-0.16009
247.247	-0.06262	248.1		248.314	-0.04474	275.796	0.00497	248.878	-0.15029	248.885	6.6245	267.888	0.01878	267.895	0.04229	267.81	-0.01711	267.817	0.07974	267.824	-0.00974	247.026
247.35	0.0058	248.204	-0.07596	248.417		275.889	0.06042	248.895	-0.13999	248.902	-0.04728	267.981		267.988		267.903	0.01858	267.91	0.02201	267.917	0.0178	247.129	1.91412
247.577	0.00436	248.307	-0.01042	267.767	0.02489	275.981		248.913	-0.1379	248.92	0.26138	268.073		268.081		267.995		268.002		268.009		247.233	-0.03676
247.681	-0.07314	248.41	-0.0826	267.86	0.0076	276.074		248.931	0.07955	248.938	0.09701	268.166	-0.04902	268.173	0.01759	268.088		268.095		268.102		247.336	0.02334
247.784	0.11781	267.76	0.04203	267.952	0.07903	276.167		248.949	0.04129	248.956	0.68158	268.259	0.02078	268.266	0.01936	268.18	0.00519	268.187	0.07406	268.195	-0.00993	247.667	0.06554
247.887	-0.14663	267.853	0.02514	268.045		276.259		248.966		248.974		268.351	0.0449	268.358	0.02111	268.273	-0.00657	268.28	-0.03853	268.287	0.04742	247.77	0.00518
247.99		267.945	-0.00356	268.138	0.03555	276.352		248.984		248.991		268.492	0.06246	268.499	0.05117	268.365	-0.02242	268.372	0.07335	268.38	-0.0581	247.873	-0.20711
248.093		268.038		268.23	0.04756	276.444		249.002		249.009		268.587	0.02864	268.594	0.07667	268.506	0.01849	268.513	0.0618	268.521	0.03217	247.976
248.196	0.01225	268.13	0.00301	268.323	-0.00228	276.537		249.02		249.027		268.68	-0.02673	268.687	0.48828	268.602	0.01225	268.609	0.0467	268.616	-0.0466	248.079
248.3	0.00902	268.223	0.01882	268.415	0.04455	276.63		249.037		249.045		268.773	0.0816	268.78	-0.00447	268.694	0.14334	268.701	0.01527	268.708	0.01532	248.182	-0.01385
248.403	0.01091	268.315	0.07481	268.463	0.03127	276.722		249.055		249.062		268.865	-0.00398	268.872	0.05198	268.787	0.08968	268.794	0.00263	268.801	0.02356	248.286	0.07767
266.605	0.06944	268.408	0.00771	268.559	0.04679	276.815		249.073		249.08		268.958	0.01972	268.965		268.879	0.01398	268.887	0.01784	268.894	-0.0094	248.389	-0.0068
266.622	-0.03192	268.456	0.07712	268.651	-0.00858	276.903		249.091		249.098		269.05		269.057		268.972		268.979		268.986		267.831	-0.000661879
266.64	-0.10713	268.552	0.05589	268.744	0.06119	276.996		249.108		249.116		269.143	0.04208	269.15	0.02379	269.065		269.072		269.079		267.924	0.01305
267.753	-0.02699	268.644	0.06348	268.837	0.06055	277.088		249.126	0.1803	249.133	0.22412	269.235	0.03138	269.243	-0.00307	269.157	0.02562	269.164	-0.0139	269.171	0.08229	268.016
267.845	-0.01254	268.737	-0.06897	268.929	0.01583	277.181	0.0342	249.144	0.1038	249.151	-0.07838	269.328	0.05414	269.335	0.03926	269.25	-0.00461	269.257	0.03129	269.264	0.03135	268.109
267.938	-0.00999	268.829	0.03634	269.022		277.274	-0.00451	249.162	-0.07806	249.169	0.04813	269.421	-0.15845	269.428	0.04556	269.342	-0.011	269.349	0.05961	269.356	0.05563	268.202	0.00907
268.031		268.922	0.07502	269.114		277.366	0.10325	249.18	0.12939	249.187	0.05298	269.513	-0.01979	269.52	1.23476	269.435	-0.00984	269.442	-0.093	269.449	-0.01291	268.294	0.03459
268.123		269.015		269.207	0.02181	277.506	-0.03363	249.197	0.14636	249.204	0.11898	269.606	-0.09887	269.613	-0.00746	269.527	2.83805	269.534	-0.04997	269.542	-0.07777	268.387	0.01988
268.216	-0.00922	269.107		269.299	0.08418	277.599	-0.00365	249.215	-0.03224	249.222	0.19366	269.698	0.0852	269.705	0.03449	269.62	-0.06101	269.627	-0.16069	269.634	-0.18555	268.528	0.01515
268.308	-0.01047	269.2	0.01859	269.392	0.07832	277.691	0.01834	249.233	0.14611	249.24	0.03285	269.81	0.03237	269.817	0.10319	269.713	-0.05596	269.72	0.04825	269.727	0.05576	268.623	0.04678
268.401	0.01671	269.292	0.05497	269.485	0.0094	277.784	-0.02558	249.251	-0.02456	249.258	0.09357	269.903	0.04017	269.91	0.03777	269.824	0.0137	269.832	-0.00681	269.839	0.0657	268.716	0.20988
268.449	-0.02969	269.385	0.05164	269.577	-0.04582	277.877	0.06291	249.268	-0.05943	249.276	0.04331	269.995		270.002		269.917	-0.01203	269.924	0.04961	269.931	0.0064	268.808	0.05133
268.544	-0.0192	269.477	0.01393	269.67	0.0807	277.969		249.286	0.17914	249.293	-0.05993	270.088		270.095		270.01		270.017		270.024		268.901	0.02301
268.637	0.00582	269.57	0.01724	269.782	0.01037	278.061		249.304	-0.0633	249.311	0.00784	270.18	0.02434	270.188	0.0286	270.102		270.109		270.116		268.993
268.73	0.05639	269.663	-0.20052	269.874	0.02053	278.154	0.0302	249.34	0.03021	249.347	0.26047	270.273	0.04815	270.28	0.03064	270.195	0.05306	270.202	0.01605	270.209	0.05278	269.086
268.822	-0.07621	269.775	0.10424	269.967		278.246	0.003	249.354	0.04818	249.361	0.01251	270.365	0.01721	270.373	0.02432	270.287	0.04632	270.294	0.06532	270.301	0.05554	269.178	0.01027
268.915	0.000492601	269.867	0.01866	270.059		278.34	0.0442	249.368	0.17633	249.375	-0.01784	270.458	-0.12228	270.465	0.04288	270.38	0.03625	270.387	0.0258	270.394	-0.01273	269.271	0.02385
269.008		269.96		270.152	0.01848	278.432	0.00385	249.386	-0.04356	249.407	0.51326	270.551	0.01268	270.558	0.51551	270.472	-0.00818	270.479	0.02879	270.487	0.03055	269.364	0.04034
269.1		270.052		270.244	0.1014	278.524	-0.03542	249.4	-0.0276	249.422	0.22252	270.643	0.29376	270.65	0.00234	270.565	0.00239	270.572	0.05964	270.579	-0.02301	269.456	0.03163
269.193	-0.05192	270.145	0.00912	270.337	0.0157	278.617	0.02459	249.415	0.14332	249.439	0.2594	270.736	0.0247	270.743	0.03365	270.658	-0.15959	270.665	0.01339	270.672	-0.04462	269.549	-0.01481
269.285	-0.00612	270.237	-0.00717	270.429	0.11913	278.709	-0.00868	249.432	0.06334	249.454	0.08996	271.432	0.10188	271.439	-0.17044	270.75	-0.09903	271.453	-0.02372	271.46	0.06758	269.641	0.4408
269.378	-0.01078	270.33	0.02849	270.522	-0.07509	278.817	0.01255	249.447	-0.20851	249.468	0.04539	271.525	-0.00184	271.532	-0.20636	271.446	-0.1305	271.546	0.01083	271.553	0.01149	269.734	0.04007
269.47	-0.27121	270.422	0.01969	270.615	-0.96766	278.91	0.00911	249.461	0.07939	249.486	0.09841	271.617	-0.06602	271.624	-0.02305	271.539	-0.50273	271.638	-0.11564	271.646	0.04354	269.846	0.06647
269.563	-0.16666	270.515	0.19195	270.707	-0.10329	279.002		249.479	-0.08972	249.5	0.22695	271.71	-0.00884	271.717	0.02816	271.631	-0.01763	271.731	-0.00747	271.738	0.04976	269.938	0.03742
269.656	-0.0305	270.608	-0.06551	271.403	-0.05416	279.095		249.493	0.07469	249.514	0.02375	271.802	-0.03104	271.809	0.0143	271.724	0.00835	271.823	0.04261	271.831	0.03171	270.031
269.748	-0.02339	270.7	-0.06852	271.496	-0.37387	279.187		249.507	-0.27079	249.532	-0.0063	271.895	0.00201	271.902	0.09817	271.816	-0.01585	271.916	0.03482	271.923	-0.00397	270.124
269.767	0.04099	271.396	0.0696	271.589	0.03966	279.28		249.525	0.10082	249.546	0.01241	271.987		271.994		271.909	-0.05026	272.009		272.016		270.216	0.04987
269.86	-0.01133	271.489	-0.00769	271.681	0.04023	279.356		249.539	-0.08825	249.561	0.00885	272.08		272.087		272.001		272.101		272.108		270.309	0.07767
269.952	-0.000270314	271.581	-0.13736	271.774	0.07611	279.415	0.02295	249.553	0.05102	249.578	-0.05066	272.172	0.01269	272.179	0.00927	272.094		272.194	0.04559	272.201	0.10976	270.401	0.04907
270.045		271.674	-0.02847	271.866	-0.01815	279.465	0.01359	249.571	0.0231	249.593	0.04549	272.265	0.03492	272.272	0.00338	272.187	0.0076	272.286	0.05956	272.293	0.04884	270.494	0.03104
270.138	-0.01438	271.766	0.06334	271.959		279.516	0.01586	249.585	-0.52253	249.607	0.06204	272.357	0.02384	272.365	0.0182	272.279	-0.02186	272.379	0.02203	272.386	0.05003	270.586	-0.07843
270.23	0.04354	271.859	0.05776	272.051		279.585	-0.03131	249.6	0.05269	249.625	0.02236	272.45	0.05915	272.457	0.00438	272.372	0.03476	272.471	0.03452	272.479	0.09188	270.679	-0.0623
270.323	0.02864	271.952	0.03609	272.144	0.04452	279.668	0.000979768	249.618	0.13223	249.639	0.04067	272.543	0.03026	272.55	0.0298	272.464	0.00835	272.564	0.02098	272.571	0.06289	271.468	-0.11041
270.415	-0.04445	272.044		272.236	0.03064	279.716	0.03024	249.632	0.2454	249.653	-0.00301	272.635	-0.00339	272.642	0.07664	272.557	-0.04037	272.656	0.01592	272.664	0.04406	271.56	-0.03443
270.508	0.01232	272.137	-0.01647	272.329	0.04379	279.765	0.01712	249.646	0.06396	249.671	0.10578	272.728	0.06628	272.735	0.02356	272.649	0.02493	272.749	-0.01616	272.756	0.08397	271.653	0.22287
270.6	0.02105	272.229	0.01645	272.421	0.05169	279.813	0.0063	249.664	-0.07385	249.685	0.02717	272.82	0.00678	272.827	0.02199	272.742	0.0427	272.841	0.0158	272.849	0.06727	271.745	0.00857
270.693	0.00607	272.322	0.01951	272.514	0.02055	279.862	-0.02204	249.678	0.05571	249.7	-0.03811	272.913	0.03748	272.92	0.05988	272.834	0.00209	272.934	0.02281	272.941	0.04511	271.838	0.06695
271.389	0.05803	272.414	-0.04291	272.607	0.06376	279.888	-0.01537	249.692	0.10862	249.717	0.0599	273.005		273.012		272.927	0.00812	273.027		273.034		271.93	0.08136
271.482	0.03647	272.507	0.03134	272.699	0.00821	279.981		249.71	0.0595	249.732	-0.02631	273.098		273.105		273.02		273.119		273.126	0.07579	272.023
271.574	0.0583	272.599	-0.02032	272.792	-0.05439	280.073		249.725	0.12135	249.746	0.00508	273.19	0.02827	273.197	0.07146	273.112		273.212	0.09064	273.219	-0.00175	272.115
271.667	0.03077	272.692	-0.00137	272.884	0.01287	280.166	0.0495	249.739	0.12762	249.764	0.00563	273.283	0.0371	273.29	0.0497	273.205	0.00215	273.304	-0.00711	273.311	0.06992	272.208	0.01017
271.759	0.0217	272.784	0.017	272.977		280.258	0.04023	249.757	0.01996	249.778	0.06662	273.375	-0.02164	273.382	-0.01444	273.297	0.0078	273.397	0.02239	273.404	0.01609	272.301	0.03415
271.852	0.04872	272.877	0.02825	273.069		280.347	0.04497	249.771	0.04332	249.792	0.04357	273.468	0.01991	273.475	0.04075	273.389	0.00466	273.489	0.0675	273.496	0.06509	272.393	0.04053
271.944	-0.00493	272.97		273.162	0.00843	280.392	0.02093	249.785	0.04441	249.81	0.05883	273.56	0.035	273.568	0.52748	273.482	-0.00488	273.582	-0.00472	273.589	0.05459	272.486	0.05144
272.037		273.062		273.254	-0.02158	280.437	0.02226	249.803	0.07042	249.824	0.48538	273.652	-0.03848	273.659	0.04896	273.575	-0.00454	273.673	0.02923	273.68	0.06272	272.578	0.02043
272.129	0.04606	273.155	0.04066	273.347	0.000356139	280.482	0.00386	249.817	0.03076	249.839	0.11732	273.744	-0.03361	273.751	-0.1073	273.666	-0.04739	273.766	-0.00346	273.773	0.07982	272.671	0.0273
272.222	0.01809	273.247	0.0058	273.439	0.01367	280.538	-0.000663284	249.831	0.04733	249.856	0.0399	273.837	0.06675	273.844	0.01539	273.759	0.04749	273.858	0.02188	273.865	-0.00265	272.763	0.03798
272.315	-0.00788	273.34	0.02281	273.532	-0.07872	280.63	0.04376	249.849	-0.02314	249.871	-0.00357	273.93	0.02313	273.937	0.04729	273.851	0.03819	273.951	0.01033	273.958	0.0606	272.856	0.033
272.407	-0.01822	273.432	0.03379	273.623	0.02922	280.723	0.06702	249.863	0.1225	249.885	-0.12231	274.022		274.029		273.944	0.0247	274.043		274.051		272.948	0.05566
272.5	-0.00284	273.525	0.02434	273.716	0.00185	280.835	0.05211	249.878	0.01509	249.903	-0.05056	274.115		274.122		274.036		274.136	0.02798	274.143	0.05826	273.041
272.592	0.0042	273.616	0.0013	273.808	0.04915	280.927	-0.0029	249.895	-0.02553	249.917	1.02761	274.207	0.06463	274.214	0.02604	274.129	0.03098	274.229	0.05192	274.236	0.00828	273.133	0.03387
272.685	0.04857	273.709	0.05536	273.901	0.01814	281.02		249.91	0.06971	249.931	0.09724	274.3	0.02353	274.307	0.02166	274.221	0.04932	274.321	0.01963	274.328	0.10555	273.226	0.02833
272.777	0.000717394	273.801	0.0063	273.994		281.113		249.924	0.02929	249.949	-0.0514	274.392	-0.08745	274.4	-0.00471	274.314	0.01467	274.485	0.06239	274.492	-0.00425	273.318	-0.02025
272.87	0.03537	273.894	0.05642	274.086		281.205	-0.03129	249.942	0.06095	249.963		274.463	-0.1271	274.47	0.05161	274.407	0.03675	274.577	0.08328	274.584	0.04413	273.411	-0.01101
272.963		273.986		274.179	0.00531	281.297	-0.00978	249.956	-0.31966	249.977		274.556	-0.16897	274.563	0.00995	274.478	0.05502	274.67		274.677		273.503	0.00728
273.055		274.079		274.271	0.05038	281.392	-0.03385	249.97		249.995		274.648	0.02898	274.656		274.57	-0.0169	275.839	-0.17703	275.846	0.0354	273.596	0.02704
273.148	0.01944	274.172	0.00458	274.364	-0.00707	281.485	-0.03259	249.988		250.009		275.818	0.01289	274.812	0.0199	274.663		275.932	0.01393	275.939	0.04877	273.687	0.01796
273.24	-0.01835	274.264	-0.0113	274.435	-0.00136	281.581	0.01408	250.002		250.023		275.91	0.03059	274.954	0.01015	274.835	0.0148	276.024		276.031		273.78	0.0124
273.332	-0.01404	274.357	-0.01797	274.527	-0.02028	281.676	0.0043	250.016		250.041		276.003		275.096		274.976		276.117		276.124		273.873	0.01836
273.425	0.03034	274.428	0.03236	274.62	0.01221	281.825	0.0198	250.034		250.055		276.095		275.237	0.01056	275.118		276.209		276.216		273.965
273.518	0.01704	274.52	0.01097	274.713	-0.01316	281.917	0.04732	250.048		250.07		276.188		275.379	0.02119	275.26	0.0116	276.302		276.309		274.058
273.609	-0.01705	274.613	0.00148	275.789	-0.1631	282.01		250.063		250.087		276.281		275.521	0.01479	275.402	0.01843	276.395		276.402		274.15	0.01228
273.702	0.00815	274.706	0.00103	275.882	-0.01115	282.102		250.08		250.102		276.373		275.662	0.01215	275.543	0.01306	276.487		276.494		274.243	-0.00283
273.794	0.00631	275.782	-0.02374	275.974		282.195	0.01064	250.095		250.116		276.466		275.825	0.07975	275.685	0.01464	276.58		276.587		274.336	0.00985
273.887	-0.00258	275.875	0.12614	276.067		282.336	0.02664	250.109		250.134	0.00704	276.558		275.917	0.0407	275.832	0.00728	276.672		276.679		274.499	0.01053
273.979		275.967		276.159		282.428	-0.01399	250.127	0.00322	250.148	-0.01493	276.651		276.01		275.924	0.00798	276.765		276.772		274.592	0.02667
274.072		276.06		276.252		282.521	-0.03455	250.141	0.02385	250.162	0.00404	276.743		276.103		276.017		276.857		276.864		274.684
274.164	0.03408	276.152		276.345		282.613	-0.00104	250.155	0.01364	250.18	0.05793	276.836		276.195		276.11		276.946		276.953		274.857	0.01627
274.257	0.03884	276.245		276.437		282.712	-0.0332	250.173	-0.043	250.194	0.01321	276.925		276.288		276.202		277.039		277.046		274.999
274.35	-0.05487	276.337		276.53		282.804	0.0015	250.187	0.02147	250.209	0.09616	277.017		276.38		276.295		277.131	0.02639	277.138	0.03591	275.141	0.0147
274.421	0.03706	276.43		276.622		282.897	0.03465	250.201	0.02542	250.226	0.03389	277.11		276.473		276.387		277.224	0.02136	277.231	0.07264	275.282	0.01413
274.513	-0.08462	276.523		276.715		282.989		250.219	0.0067	250.241	-0.00633	277.202	0.05392	276.565		276.48		277.316	0.01393	277.323	-0.000723538	275.424	0.01109
274.606	0.08618	276.615		276.807		283.082		250.233	0.02805	250.255	0.05721	277.295	-0.00519	276.658		276.573		277.409	0.00682	277.426	0.03477	275.566	0.00966
274.698	0.04982	276.708		276.896		283.174	0.02702	250.248	0.08552	250.273	0.0346	277.387	0.04176	276.751		276.665		277.549	-0.04836	277.556	-0.20497	275.707	0.00278
274.745	0.01634	276.8		276.989		283.267	-0.01943	250.265	-0.00457	250.287	0.000176519	277.528	0.05626	276.843		276.758		277.642	0.0636	277.649	0.03635	275.853	0.02797
274.887	0.01474	276.889		277.081		283.359	-0.02439	250.28	0.04933	250.301	0.04075	277.62	-0.04971	276.932		276.85		277.734	0.01778	277.741	0.04455	275.946	0.05109
275.028		276.982		277.174	0.03001	283.452	0.01691	250.294	0.0256	250.319	-0.00686	277.713	-0.03162	277.024		276.939		277.827	-0.00040792	277.834	-0.00348	276.039
275.17	0.01049	277.074		277.266	0.03137	283.544	0.02927	250.312	-0.00848	250.333	-0.00782	277.805	0.15389	277.117		277.031		277.919	0.01368	277.926	0.02098	276.131
275.312	0.0153	277.167	0.08134	277.359	0.0116	283.637	0.02442	250.326	0.02854	250.347	0.01321	277.898	0.03808	277.209	0.06391	277.124		278.012		278.019		276.224
275.454	0.0089	277.259	-0.0163	277.492	-0.04312	283.73	-0.01772	250.34	-0.00113	250.365	0.01704	277.99		277.302	0.01453	277.217	0.04269	278.104		278.111		276.316
275.595	0.00754	277.352	0.04145	277.592	-0.04445	283.822	0.03311	250.358	-0.01647	250.379	-0.00917	278.083		277.395	-0.03531	277.309	0.05965	278.197	-0.024	278.204	-0.01432	276.409
275.737	0.01884	277.485	0.52998	277.684	0.01401	283.915	0.01159	250.372	-0.00377	250.394	-0.000395829	278.175	-0.01957	277.535	-0.02169	277.402	0.05816	278.289	0.00924	278.296	0.01148	276.501
275.775	0.02904	277.585	-0.09545	277.777	-0.00961	284.007		250.387	0.05516	250.412	0.03019	278.268	0.03085	277.627	0.02148	277.542	-0.02594	278.382	0.02292	278.389	-0.00442	276.594
275.867	-0.00867	277.677	-0.03248	277.869	0.01166	284.1		250.404	0.09746	250.426	0.03679	278.361	0.000103205	277.72	0.04037	277.635	-0.03924	278.475	0.04045	278.482	0.02767	276.687
275.96		277.77	0.02262	277.962		284.192	0.01246	250.419	0.02236	250.44	0.049	278.453	0.0093	277.813	-0.00266	277.727	-0.03239	278.567	-0.01783	278.574	0.04578	276.779
276.053		277.862	0.05077	278.054		284.285	0.01293	250.433	-0.05494	250.458	0.07717	278.546	0.01151	277.905	0.04099	277.82	-0.04625	278.66	-0.02082	278.667	0.02842	276.872
276.145		277.955	0.02658	278.147	0.000724222	284.377	0.00655	250.451	0.04215	250.472	0.00843	278.638	-0.00411	277.997		277.912	-0.026	278.752	-0.000336386	278.759	0.00835	276.96
276.238		278.047		278.239	-0.01475	284.469	-4.78258e-05	250.465	0.08126	250.486	0.03501	278.731	-0.00833	278.09		278.005		278.86	-0.01138	278.867	0.03802	277.053
276.33		278.14	0.000409008	278.332	-0.00491	284.562	0.01053	250.479	0.00667	250.504	0.06093	278.839	0.0248	278.182	-0.01254	278.097		278.953	0.01459	278.96		277.145	0.09071
276.423		278.232	0.02303	278.425	0.04159	284.655	0.00213	250.497	-0.01457	250.518	-0.03471	278.931	0.00246	278.275	0.04622	278.19	-0.03462	279.045		279.052		277.238	0.04985
276.516		278.325	0.03258	278.517	0.0325	284.747	-0.00969	250.511	0.04144	250.533	0.02637	279.024		278.368	0.04912	278.282	-0.01825	279.138		279.145		277.331	0.04618
276.608		278.418	0.02938	278.61	-0.02474	284.84	0.05067	250.525	0.11639	250.55	0.00642	279.116		278.46	0.00538	278.375	0.02378	279.23		279.237		277.433	0.08558
276.701		278.51	0.05837	278.702	0.00338	284.932	0.08538	250.543	0.04253	250.565	-0.16103	279.209		278.553	0.01732	278.468	-0.01275	279.323		279.33		277.563	0.00577
276.793		278.603	-0.00304	278.81	0.04265	285.025		250.558	0.05134	250.579	-0.00806	279.301		278.645	0.01899	278.56	-0.03344	279.376		279.379		277.656	-0.07255
276.882		278.695	0.00774	278.903	0.07049	285.142	-0.0479	250.572	0.75577	250.597	0.00458	279.366		278.738	0.03918	278.652	-0.06644	279.436	-0.0019	279.439	-0.0315	277.749	0.0515
276.974		278.803	0.01504	278.995		285.235	0.06219	250.59	0.0415	250.611	-0.00279	279.425	-0.0242	278.846	0.02528	278.745	0.00401	279.487	0.0219	279.49	0.03222	277.841	-0.02164
277.067		278.896	0.00469	279.088		285.327	-0.0016	250.604	0.11638	250.625	0.10431	279.476	0.04455	278.938	0.03382	278.853	-0.01995	279.537	-0.04284	279.541	-0.01	277.933	-0.02023
277.16	-0.0168	278.988		279.18		285.42	-0.01465	250.618	0.04451	250.643	0.01032	279.526	0.00785	279.031		278.945	-0.0484	279.628	0.03938	279.635	0.06545	278.026
277.252	0.01418	279.081		279.273		285.512	-0.0492	250.636	-0.17969	250.657	-0.02194	279.606	0.00294	279.123		279.038		279.687	0.03262	279.691	0.01842	278.118
277.345	-0.04701	279.173		279.353		285.605	0.05361	250.65	-3.18909	250.672	0.08806	279.678	-0.02281	279.216		279.13		279.736	-0.04805	279.739	0.000639366	278.211	0.02586
277.478	0.000770746	279.266		279.408	-0.73979	285.697	0.05195	250.664	0.0667	250.689	0.03413	279.726	-0.00955	279.308		279.223		279.784	0.05465	279.788	0.00176	278.397	0.02585
277.578	0.02224	279.35		279.461	-0.02551	285.79	0.03529	250.682	0.05658	250.704	-0.00973	279.774	-0.01083	279.369		279.316		279.833	0.02184	279.836	0.0135	278.489	-0.03204
277.67	-0.04675	279.406		279.512	0.00857	285.882	0.02752	250.696	0.02085	250.718	0.56239	279.823	0.01477	279.428	0.02066	279.373		279.931	0.00679	279.938	0.0069	278.581	0.00517
277.763	-0.14617	279.458	0.01875	279.559	0.02574	285.975		250.711	0.00332	250.736	0.05206	279.909	0.04444	279.479	0.0072	279.433	0.02355	280.024		280.031		278.674	-0.02508
277.855	-0.00908	279.508	0.05424	279.578	0.01663	286.067		250.729	0.04716	250.75	0.05045	280.002		279.53	0.08458	279.484	-0.00927	280.116		280.123		278.766	0.03069
277.948	-0.03143	279.555	-0.00551	279.664	0.03009	286.16	-0.00489	250.743	0.04457	250.764	0.03656	280.095		279.613	0.01257	279.534	0.01516	280.209	-0.00344	280.216	0.03358	278.874	0.08857
278.04		279.571	-0.0168	279.713	-0.02439	286.252	0.03038	250.757	-0.07159	250.782	0.06919	280.187	0.02863	279.681	-0.02471	279.621	-0.00157	280.301	0.00642	280.308	0.04247	278.967
278.133	-0.0392	279.661	0.06116	279.761	-0.02157	286.345	0.00592	250.775	0.05889	250.796	0.01706	280.28	0.01014	279.729	-0.01182	279.684	0.00355	280.367	0.02182	280.37	0.04	279.059
278.225	-0.0741	279.709	0.00288	279.81	-0.01045	286.437	0.03922	250.789	-0.07032	250.811	0.03398	280.357	-0.00096421	279.778	-0.00688	279.732	0.01039	280.411	-0.01233	280.415	-0.02874	279.152
278.318	-0.000139558	279.758	0.02482	279.858	0.03742	286.53	0.00334	250.803	-0.00414	250.828	0.34202	280.401	0.04442	279.826	-0.0143	279.781	0.01054	280.457	0.05978	280.46	0.04362	279.244
278.411	-0.02269	279.807	0.03727	279.881	0.08327	286.622	0.01621	250.821	-0.01772	250.843	0.01743	280.447	-0.03168	279.917	0.03425	279.83	0.0112	280.502	-0.02979	280.505	0.02424	279.337
278.503	-0.02637	279.855	-0.01334	279.974		286.715	0.02349	250.835	0.00151	250.857	0.07589	280.492	0.01701	280.009		279.924	-0.00128	280.581	0.01596	280.588	0.00356	279.382
278.596	0.04704	279.874	0.00795	280.066		286.807	0.08862	250.85	0.00209	250.875	0.02822	280.559	0.01602	280.102		280.016		280.673	0.05033	280.68	0.016	279.443	0.01187
278.688	-0.08841	279.966		280.159	0.02664	286.9	0.04378	250.867	-0.0564	250.889	0.07768	280.652	-0.02664	280.194	0.00107	280.109		280.789	0.05149	280.797	0.04813	279.494	-0.05651
278.796	0.01866	280.059		280.251	-0.00721	286.992		250.882	0.62052	250.903	0.03156	280.768	-0.04763	280.287	0.01831	280.201	-0.00118	280.878	0.05742	280.885	0.05668	279.545	0.0362
278.888	-0.02387	280.152	-0.00201	280.344	-0.01349	287.085		250.896	0.05917	250.921	0.04415	280.856	0.00238	280.36	0.01272	280.294	0.01066	280.97		280.977		279.642	0.03539
278.981		280.244	0.00287	280.388	0.04039	287.177	0.04983	250.914	0.01948	250.935	0.05767	280.949	0.02962	280.405	0.00645	280.363	-0.0281	281.063		281.07		279.694	-0.03578
279.074		280.34	0.05425	280.433	-0.02372	287.27	0.04893	250.928	0.49093	250.949	0.01314	281.041		280.45	0.000232738	280.408	0.01482	281.155	-0.00909	281.162	0.04563	279.742	0.0244
279.166		280.385	0.00673	280.479	0.01718	287.362	0.04209	250.942	-0.02418	250.967		281.134	0.03147	280.495	0.03976	280.453	0.01802	281.248	0.00774	281.255	0.04103	279.791	0.0178
279.259		280.43	0.01198	280.531	-0.01237	287.455	-0.01551	250.96		250.981		281.226	-0.02263	280.566	0.03365	280.498	0.02374	281.343	0.00705	281.35	0.00211	279.839	0.06377
279.346		280.475	0.02045	280.623	0.01509	287.547	0.0025	250.974		250.996		281.321	-0.01248	280.659	-0.01455	280.574	0.00486	281.435	0.01531	281.442	-0.00153	279.945	0.02527
279.402		280.524	-0.00731	280.716	-0.02026	287.64	0.0551	250.989		251.014		281.414	0.0308	280.775	0.00328	280.666	-0.00743	281.532	0.02241	281.539	0.00749	280.038
279.454	0.0257	280.616	0.00412	280.828	-0.01491	287.732	0.01108	251.006		251.028		281.51	0.03681	280.863	0.01432	280.782	-0.02926	281.626	0.01906	281.634	0.02809	280.13	0.00631
279.504	-0.00615	280.709	0.035	280.92	-0.04076	287.825		251.021		251.042		281.603	-0.03195	280.956	0.04289	280.871	-0.0593	281.719	-0.00799	281.726	0.02642	280.223	-0.01928
279.551	-0.01225	280.821	0.08544	281.013		287.917		251.035		251.06		281.697	-0.01577	281.048		280.963		281.867	0.01843	281.874	0.05462	280.315	0.04517
279.564	-0.03543	280.913	0.03151	281.105		288.009		251.053		251.074		281.846	0.03532	281.141	0.03447	281.056		281.96		281.967		280.373	0.01212
279.658	-0.05918	281.006		281.198	0.03022	288.06		251.067		251.088		281.938	0.00711	281.233	0.04411	281.148	0.00967	282.052		282.059		280.418	0.07587
279.706	0.00037179	281.098		281.29	0.02787	288.152		251.081		251.106		282.031		281.329	0.05546	281.241	-0.02764	282.145	-0.0614	282.152	0.04046	280.463	0.0008076
279.755	0.01942	281.191	0.05104	281.385	0.00727	288.245		251.099		251.12		282.123		281.421	0.02232	281.336	0.03867	282.237	0.0242	282.29	0.08559	280.508	0.02614
279.803	0.08448	281.283	-0.08453	281.478	0.02316	288.337		251.113		251.135	-0.02999	282.216	-0.02132	281.517	-0.02022	281.428	0.01266	282.378	0.04866	282.385	0.00976	280.595	-0.00111
279.852	0.03213	281.378	-0.36875	281.574	0.01401	288.43		251.128	-0.02099	251.152	-0.01099	282.357	0.0095	281.612	0.05526	281.524	0.0192	282.471	0.00768	282.478	0.01217	280.687	0.03003
279.867	-0.02087	281.471	-0.02099	281.669	0.03575	288.522	0.02909	251.145	-0.03837	251.167	0.01078	282.449	0.02605	281.705	0.02859	281.619	-0.03151	282.563	0.02067	282.57	0.05521	280.804	0.00574
279.959		281.567	0.04911	281.817	-0.01579	288.615	0.04617	251.16	-0.02516	251.181	0.02572	282.542	-0.02653	281.853	0.06969	281.712	0.01162	282.656	-0.02183	282.663	-0.01815	280.892	0.03232
280.052		281.662	-0.00258	281.91	0.01281	288.707	-0.19483	251.174	0.02533	251.199	-0.000452216	282.634	0.01512	281.946	0.00304	281.86	-0.00487	282.754	0.02093	282.762	0.0436	280.984
280.144	0.02962	281.81	0.04359	282.002		288.8	-0.22353	251.192		251.213	0.01797	282.733	0.01288	282.038		281.953	0.00954	282.847	0.02562	282.854	0.01918	281.077
280.237	0.00739	281.903	0.0141	282.095		288.892	0.05735	251.206	0.00326	251.227	-0.0055	282.826	-0.05196	282.131	0.07478	282.045		282.94	-0.0218	282.947	0.05131	281.169	0.04792
280.337	0.04832	281.995		282.187	0.03649	288.985		251.22	-0.04049	251.245	0.06012	282.918	-0.03287	282.223	0.05684	282.138	-0.0145	283.032		283.039		281.262	0.000648987
280.382	-0.07038	282.088		282.328	0.02702	289.077		251.238		251.259	-0.02543	283.011		282.364	0.04296	282.23	0.05064	283.125		283.132	0.07354	281.357	0.000114199
280.427	-0.02218	282.18	0.03486	282.421	-0.00713	289.17	-0.01486	251.252	0.01495	251.274	0.00733	283.103		282.457	0.06665	282.371	-0.01957	283.217	0.03292	283.224	0.0438	281.449	0.01529
280.472	-0.01996	282.321	0.02264	282.513	0.05396	289.263	0.02679	251.266	-0.21499	251.291	0.11773	283.196	-0.03275	282.549	0.02182	282.464	0.02383	283.31	0.000703904	283.317	0.00738	281.546	0.05198
280.517	0.02929	282.414	0.04155	282.606	0.01847	289.355	0.44451	251.284	0.02509	251.306	0.04223	283.288	-0.01739	282.642	-0.03903	282.556	0.03193	283.402	0.03499	283.409	0.00535	281.641	-0.00335
280.609	0.03172	282.506	-0.01009	282.704	-0.0562	289.448	-0.03585	251.299	0.02462	251.32	0.02608	283.381	-0.01183	282.74	0.00368	282.649	-0.18276	283.495	0.01452	283.502	-0.01222	281.881	-0.04857
280.701	-0.04359	282.599	-0.05698	282.797	0.0022	289.54	0.08088	251.313	-0.01427	251.338	0.01102	283.473	-0.07791	282.833	-0.01123	282.747	0.02162	283.587	0.02246	283.594	0.0322	281.974
280.814	0.03633	282.697	-0.08702	282.89	0.04521	289.633	-0.00779	251.331	0.02919	251.352	-0.02293	283.566	0.00243	282.925	-0.01434	282.84	0.01715	283.68	0.03803	283.687	0.02862	282.067
280.906	-0.02157	282.79	-0.00855	282.982		289.725	-0.09478	251.345	0.03492	251.366	0.0578	283.658	0.00176	283.018		282.932	0.02607	283.772	0.03895	283.779	0.0064	282.159	-0.04271
280.999		282.882	-0.05314	283.075		289.818	0.0439	251.359	-0.0407	267.789	-0.00623	283.751	-0.00223	283.11		283.025		283.865	-0.04751	283.872	0.04278	282.3	-0.01558
281.091		282.975		283.167	-0.01521	289.91	0.05396	251.377	0.00446	267.881	0.00463	283.843	0.00499	283.203	-0.00723	283.118		283.957	0.04142	283.965		282.393	-0.00493
281.184	-0.05027	283.068		283.26	0.04608	290.003		267.781	-0.02413	267.974		283.936	0.01639	283.295	0.06548	283.21	-0.02039	284.05		284.057		282.485	-0.00709
281.276	-0.06566	283.16	0.03104	283.352	-0.00976	290.095		267.874	0.03526	268.066		284.028		283.388	0.01645	283.302	-0.03426	284.142	-0.02176	284.149	0.03891	282.578	-0.14061
281.371	0.00157	283.253	-0.04571	283.445	-0.01548	290.199	-0.03672	267.967		268.159	0.01101	284.121		283.48	-0.00317	283.395	0.01916	284.235	0.00431	284.242	0.02757	282.67	0.01636
281.464	-0.05657	283.345	-0.0065	283.537	-0.02987	290.292	-0.008	268.059		268.251	0.06538	284.213	0.03762	283.573	-0.000718459	283.488	-0.03424	284.327	-0.00721	284.334	0.04187	282.769	0.02659
281.56	-0.01635	283.438	-0.02395	283.63	0.02445	290.398	0.02102	268.152	0.00327	268.344	-0.02058	284.306	0.01879	283.665	0.0327	283.58	0.01275	284.42	-0.06332	284.427	-0.01801	282.861	-0.01945
281.655	0.01439	283.53	0.0087	283.722	0.03011	290.49	0.26373	268.244	0.03982	268.485	0.05019	284.398	-0.05445	283.758	0.04681	283.673	-0.00651	284.512	0.01058	284.519	0.0381	282.954	-0.0126
281.803	0.04439	283.623	0.0207	283.815	0.0201	290.583	0.06612	268.337	0.02818	268.58	0.04582	284.491	0.01955	283.851	-0.0015	283.765	-0.00935	284.605	-0.03087	284.612	0.03205	283.046
281.896	0.03385	283.715	0.02305	283.907	0.01755	290.676	-0.0977	268.478	0.05212	268.673	0.03594	284.583	-0.01664	283.943	0.03354	283.858	0.01637	284.697	-0.00681	284.704	0.00604	283.139	0.01049
281.988		283.808	0.00615	284		290.768	-0.03761	268.573	0.0367	268.765	0.02894	284.676	-0.02539	284.036		283.95	0.00862	284.79	0.02977	284.797	0.000193402	283.231	-0.01875
282.081		283.9	0.01329	284.092		290.861	0.03273	268.666	-0.02896	268.858	0.00221	284.768	-0.01952	284.128	0.01201	284.043		284.882	0.02973	284.889	0.04402	283.324	0.01222
282.173	-0.00415	283.993		284.185	0.00318	290.953	0.06433	268.758	-0.02539	268.951	0.07326	284.861	-0.01844	284.221	0.04641	284.135	0.03027	284.975		284.982		283.416	0.01228
282.314	0.017	284.085		284.277	0.03846	291.046		268.851	0.01779	269.043		284.953	-0.02125	284.313	0.00667	284.228	-0.01233	285.067		285.074		283.509	-0.01763
282.407	-0.07167	284.178	0.00735	284.37	0.000998109	291.138	0.07668	268.943	0.04974	269.136	0.01217	285.046		284.406	0.0195	284.32	-0.02708	285.185	0.03555	285.192	0.02778	283.601	-0.000616681
282.499	0.02091	284.27	0.03557	284.462	-0.000589958	291.231	-0.01354	269.036		269.228	0.01801	285.164	0.03845	284.498	0.00187	284.413	0.02726	285.277	0.06715	285.285	0.00987	283.694	0.03892
282.592	-0.01116	284.363	-0.00996	284.555	0.01982	291.389	-0.02631	269.129	-0.00591	269.321	0.00274	285.256	0.02769	284.591	0.0154	284.505	-0.02866	285.37	0.04123	285.377	-0.00951	283.787	-0.000501456
282.69	0.00109	284.455	-0.01923	284.647	-0.04013	291.482	-0.03493	269.221	0.05211	269.413	-0.018	285.349	0.00806	284.683	-0.00489	284.598	-0.02485	285.462	-0.00951	285.47	0.00314	283.879	0.00256
282.783	-0.02095	284.548	0.02129	284.74	0.02146	291.574	0.02716	269.314	0.03875	269.506	0.02778	285.441	-0.01403	284.776	0.02399	284.69	-0.00114	285.555	0.04898	285.562	-0.03697	283.972
282.875	-0.03386	284.64	0.03022	284.832	-0.00579	291.667	-0.0247	269.406	-0.01537	269.599	0.02147	285.534	0.00769	284.868	0.0347	284.783	0.02349	285.648	-0.01578	285.655	-0.0125	284.064
282.968		284.733	0.00322	284.925	0.01376	291.759	-0.02378	269.499	-0.01869	269.691	0.04812	285.626	0.01144	284.961		284.875	0.0401	285.74	0.07979	285.747	0.0071	284.157	0.01873
283.061		284.825	-0.02158	285.017		291.852	0.04382	269.591	-0.47693	269.803	0.0342	285.719	-0.00145	285.053		284.968		285.833	-0.04903	285.84	0.06057	284.249	0.00439
283.153	0.02955	284.918	-0.0336	285.135	-0.0061	291.944	0.03661	269.684	0.00509	269.896	0.01189	285.811	-0.03131	285.171	-0.00474	285.06		285.925	0.03094	285.932	-0.01379	284.342	-0.02896
283.246	-0.02027	285.01		285.228	-0.01503	292.037		269.796	0.0458	269.988		285.904	0.05124	285.263	-0.00876	285.178	0.03879	286.018		286.025		284.434	0.05607
283.338	0.00253	285.103		285.32	-0.00533	292.129	0.01294	269.888	-0.03965	270.081		285.996		285.356	0.00397	285.27	0.000382083	286.11		286.117		284.527	-0.06382
283.431	-0.06116	285.128	0.03024	285.413	0.03375	292.222	0.01952	269.981		270.173	0.04849	286.089		285.448	0.02578	285.363	0.01043	286.203	0.02245	286.21	0.00952	284.619	0.02862
283.523	-0.01442	285.22	0.06005	285.505	-0.0098	292.314	-0.0384	270.074		270.266	0.01839	286.181	0.021	285.541	0.02607	285.455	-0.04251	286.295	0.05318	286.302	0.0452	284.712	-0.01786
283.616	-0.04187	285.313	-0.00556	285.598	-0.00846	292.407	-0.08147	270.166	0.03383	270.358	0.02931	286.274	0.01628	285.633	0.0341	285.548	-0.02099	286.388	-0.00675	286.395	-0.0401	284.804	0.03044
283.708	-0.06869	285.405	-0.03537	285.69	-0.00604	292.499	-0.0314	270.259	0.03935	270.451	0.00916	286.366	0.00617	285.726	0.01138	285.64	0.02493	286.48	0.01277	286.487	-0.02567	284.897	-0.01276
283.801	-0.03659	285.498	-0.01747	285.783	0.02983	292.591	-0.63719	270.351	-0.01446	270.544	-0.02589	286.459	0.01197	285.818	0.05856	285.733	0.0063	286.573	0.01046	286.58	0.02443	284.989
283.893	0.00878	285.591	-0.12044	285.875	0.02357	292.684	-0.12886	270.444	0.05666	270.636	0.01781	286.551	-0.03895	285.911	0.01621	285.826	-0.01032	286.665	-0.14219	286.672	0.03744	285.082
283.986		285.683	0.00301	285.968		292.776	-0.02521	270.536	-0.02618	270.729	-0.03781	286.644	0.33859	286.003		285.918	0.02791	286.758	-0.0089	286.765	-0.03148	285.199	0.00148
284.078		285.776	0.02256	286.06		292.869	-0.02214	270.629	0.14559	271.425	0.03299	286.736	0.33828	286.096		286.011		286.85	0.07652	286.857	0.000721495	285.292	0.03218
284.171	0.02208	285.868	0.00633	286.153	0.00615	292.961		270.722	0.06606	271.517	-0.00654	286.829	0.03082	286.188	-0.00733	286.103		286.943	-0.02332	286.95	0.02923	285.384	0.02824
284.263	-0.02112	285.961		286.245	0.00905	293.054		271.418	0.02076	271.61	0.00122	286.921	0.04695	286.281	0.062	286.196	0.04142	287.035		287.042		285.477	0.0124
284.356	-0.00487	286.053		286.338	-0.0126	293.146	0.04591	271.51	0.05104	271.702	0.01955	287.014		286.373	0.10238	286.288	0.03307	287.128	0.02274	287.135	0.02792	285.569	-0.17148
284.448	0.00472	286.146	-0.04177	286.43	-0.03832	293.239	-0.01191	271.603	0.00464	271.795	0.02885	287.106		286.466	0.06794	286.38	-0.02019	287.22	-0.01586	287.227	0.01594	285.662	0.01002
284.541	0.01599	286.238	0.02967	286.523	0.01015	293.331	0.02005	271.695	0.00341	271.887	0.02221	287.199	0.05864	286.558	0.08403	286.473	0.04582	287.313	0.03749	287.32	0.05842	285.754	0.01582
284.633	-0.0558	286.331	-0.02258	286.615	-0.00528	293.424	0.02775	271.788	-0.04451	271.98		287.291	0.00357	286.651	0.13934	286.565	-0.02137	287.405	0.03911	287.412	0.04975	285.847	-0.02155
284.726	-0.03259	286.423	0.02919	286.708	-0.00785	293.516	-0.02063	271.88	0.00764	272.073		287.384	0.04878	286.743	0.03625	286.658	-0.02072	287.498	-0.03662	287.505	0.00397	285.939	0.09825
284.818	0.02409	286.516	0.05388	286.8	0.00942	293.609	-0.08371	271.973		272.165	0.00947	287.476	-0.08064	286.836	0.04513	286.751	0.02562	287.59	-0.10965	287.597	0.00934	286.032
284.911	0.02722	286.608	-0.07903	286.893	0.038	293.701	-0.00864	272.065		272.258	0.04297	287.569	0.50744	286.928	0.02199	286.843	0.04105	287.682	-0.0254	287.689	0.01128	286.124
285.003		286.701	0.01661	286.985		293.794	-0.01522	272.158	0.00703	272.35	0.00139	287.661	-0.03243	287.021		286.936	0.04796	287.775	0.00508	287.782	0.01163	286.217	0.03373
285.096		286.793	0.02673	287.078		293.886	0.02177	272.251	0.0807	272.443	0.01606	287.753	-0.03176	287.113		287.028		287.867		287.874		286.309	-0.00011785
285.121		286.886	-0.01453	287.17	0.02205	293.978		272.343	0.04275	272.535	0.05102	287.846		287.206	0.05031	287.12		287.96		287.967		286.402	0.0148
285.213	-0.03664	286.978		287.263	0.0061	294.071		272.436	0.05643	272.628	0.05451	287.938		287.298	0.0596	287.213	0.04015	288.102		288.109		286.494	0.00283
285.306	-0.00447	287.071		287.355	0.03492	294.163	0.03048	272.528	0.02609	272.721	0.05395	288.081		287.391	0.12806	287.305	0.01841	288.195		288.202		286.587	0.02002
285.398	-0.02093	287.163	0.00228	287.448	-0.02739	294.256	-0.01737	272.621	0.05017	272.813	0.02916	288.173		287.483	0.08051	287.398	-0.04414	288.287		288.294		286.679	0.22043
285.491	-0.01432	287.255	0.07373	287.54	0.00119	294.348	0.01133	272.713	0.02186	272.906	-0.05807	288.266		287.576	0.1295	287.49	0.01763	288.38		288.387		286.772	-0.03657
285.583	-0.02157	287.348	-0.03053	287.633	-0.0447	294.441	-0.00809	272.806	0.06422	272.998		288.358		287.668	0.1315	287.583	0.00195	288.472		288.48		286.864	0.03759
285.676	0.02361	287.441	-0.01212	287.725	0.02452	294.533	0.03943	272.899	0.01752	273.091		288.451		287.761	0.07818	287.675	-0.04889	288.565	0.09985	288.572	0.33867	286.957	0.00608
285.769	-0.00239	287.533	-0.09925	287.817		294.625	0.02091	272.991		273.183	0.08453	288.544	0.66428	287.853		287.768	0.01253	288.657	-0.12809	288.665	-0.02462	287.049
285.861	-0.04203	287.625	-0.16248	287.91		294.718	0.03126	273.084		273.276	0.0819	288.636	-0.0057	287.945		287.86		288.75	0.01478	288.757	-0.18863	287.142	0.05797
285.954	-0.02786	287.718	-0.00499	288.002		294.81	0.00136	273.176	0.04415	273.368	0.07623	288.729	-0.05538	288.088		287.953		288.843	-0.17291	288.85	0.01119	287.234	0.03973
286.046		287.81		288.052		294.903	0.00294	273.268	0.04933	273.461	-0.0357	288.821	-0.18713	288.181		288.095		288.935	0.000278922	288.942	0.02742	287.327	-0.01426
286.139	0.02279	287.903		288.145		294.995		273.361	0.04658	273.553	0.05186	288.914	0.01466	288.273		288.188		289.028		289.035		287.419	-0.01726
286.231	0.03252	287.995		288.237		295.088		273.454	0.02647	273.645	-0.00672	289.006		288.366		288.28		289.12		289.127	0.01095	287.512	0.25833
286.324	-0.10167	288.045		288.33		295.18	-0.01159	273.546	0.04816	273.737	0.06647	289.099		288.458		288.373		289.213	0.019	289.22	0.05085	287.604	-0.05242
286.416	-0.00965	288.138		288.423		295.272	0.05574	273.637	0.10156	273.83	0.06784	289.191	-0.00524	288.551	0.08814	288.465		289.305	0.01388	289.312	0.01872	287.697	-0.03643
286.508	-0.03824	288.23		288.515	0.07693	295.365	-0.02172	273.73	0.02232	273.922	0.03269	289.284	-0.01038	288.643	0.01435	288.558	0.13065	289.398	-0.06808	289.405	0.06062	287.789	0.08085
286.601	0.01068	288.323		288.608	-0.09836	295.457	-0.04689	273.823	0.000904256	274.015		289.376	-0.11978	288.736	-0.14506	288.65	0.20375	289.49	-0.11169	289.498	-0.01868	287.881
286.694	-0.06023	288.415		288.7	0.26794	295.55	-0.03809	273.915	0.00513	274.107		289.469	0.02608	288.828	0.025	288.743	-0.02827	289.583	-0.03621	289.59		287.974
286.786	-0.02645	288.508	0.02731	288.793	0.01682	295.642	-0.04226	274.008		274.2	0.04405	289.561	-0.06464	288.921	-0.02292	288.835	0.05674	289.675	0.03997	289.683	0.13331	288.117
286.879	-0.06227	288.6	-0.14586	288.885	-0.17802	295.735	-0.04773	274.1		274.293	0.02574	289.654	-0.0181	289.013		288.928	-0.02788	289.768	0.05423	289.775	0.03482	288.209
286.971		288.693	-0.03948	288.978		295.827	0.00632	274.193	0.01155	274.385	-0.02455	289.746	-0.19889	289.106		289.021		289.86	0.07648	289.868	-0.02797	288.302
287.063		288.785	-0.03638	289.07		295.92	0.11546	274.286	0.03019	274.456	0.07232	289.839	0.02863	289.199	0.03309	289.113		289.953	0.06235	289.96		288.394
287.156	-0.02033	288.878	-0.00756	289.163	0.02238	296.012		274.378	-0.1675	274.549	0.0039	289.931	0.04202	289.291	0.00799	289.206	-0.02549	290.045		290.053		288.487	-0.04287
287.248	-0.04977	288.971		289.255	0.07547	296.116		274.449	0.04226	274.641	0.03612	290.024		289.384	0.08529	289.298	-0.00962	290.138	0.01106	290.157	0.01076	288.579	0.09323
287.341	-0.00503	289.063		289.348	0.15014	296.208	-0.02181	274.542	-0.00216	274.79	0.02104	290.117		289.476	0.0289	289.391	-0.2581	290.242	0.08583	290.249	0.0826	288.672	-0.20961
287.433	-0.06326	289.156	0.02949	289.441	0.08074	296.301	-0.03046	274.634	-0.00301	274.931	0.02199	290.221	0.03774	289.569	-0.01904	289.483	-0.03697	290.348	-0.00439	290.355	0.11457	288.764	0.06857
287.526	-0.0055	289.248	-0.00951	289.533	-0.19321	296.393	-0.04823	275.803	0.02258	275.073		290.327	-0.00225	289.661	0.5711	289.576	-0.07961	290.441	-0.16246	290.448	0.07674	288.857	0.10741
287.618	-0.01842	289.341	0.05852	289.625	-0.21782	296.486	-0.00058306	275.896	0.00533	275.215	0.01578	290.419	0.00689	289.754	-0.0067	289.668	-0.03652	290.533	-0.04985	290.54	-0.13237	288.949	-0.03295
287.711	-0.06147	289.433	0.08221	289.718	-0.05134	296.578	-0.03772	275.989		275.357	0.02149	290.512	-0.01408	289.846	0.00216	289.761	0.01118	290.626	-0.18309	290.633	-0.3983	289.042
287.803		289.526	-0.00512	289.811	0.01845	296.671	-0.00402	276.081		275.498	0.01422	290.604	-0.23638	289.939	-0.01484	289.853	-0.07875	290.718	-0.13874	290.725	-0.26078	289.135	0.02504
287.896		289.618	0.23914	289.903	0.03213	296.763	-0.04371	276.174		275.64	0.01475	290.697	-0.00607	290.031		289.946	0.05011	290.811	-0.06978	290.818	0.07662	289.227	0.03774
287.988		289.711	0.02036	289.996		296.856	-0.01534	276.266		275.81	0.03788	290.789	0.0583	290.124		290.038		290.903	-0.01457	290.911	0.03396	289.32	-0.00269
288.038		289.803	0.05451	290.088		296.948	0.04607	276.359		275.903	-0.0647	290.882	0.0511	290.228	0.05581	290.131	0.04669	290.996		291.003		289.412	0.02451
288.131		289.896	0.00726	290.192	0.0267	297.041		276.452		275.996		290.975		290.334	0.09092	290.235	-0.02811	291.088		291.096		289.505	0.05366
288.223		289.988		290.285	-0.01214	297.133	-0.04877	276.544		276.088		291.067		290.426	0.07652	290.341	0.01585	291.181	0.03569	291.188	0.03838	289.597	-0.09501
288.316		290.081		290.391	0.000633709	297.226	0.01487	276.637		276.181		291.16	0.05284	290.519	0.02174	290.434	-0.05892	291.273	-0.01894	291.281	0.07818	289.69	0.02293
288.408		290.185	0.03643	290.483	-0.000927137	297.318	-0.00636	276.729		276.273		291.252	0.00821	290.612	0.04126	290.526	0.02179	291.34	0.00544	291.347	0.04398	289.782	0.000292342
288.501	-0.17139	290.277	0.02487	290.576	-0.74555	297.411	-0.04198	276.822		276.366		291.318	0.00657	290.704	0.04017	290.619	-0.02404	291.432	0.00332	291.439	0.01798	289.875	0.0951
288.593	-0.13692	290.384	0.01996	290.668	-0.00663	297.503	-0.01706	276.91		276.459		291.411	-0.07689	290.797	0.02184	290.711	0.01715	291.525	0.00148	291.532		289.967
288.686	-0.28838	290.476	-0.21892	290.761	0.04929	297.596	-0.05785	277.003		276.551		291.503	-0.10562	290.889	0.04641	290.804	-0.01228	291.617	0.0838	291.624	-0.17968	290.06
288.778	-0.33597	290.569	-0.27061	290.853	-0.00751	297.688	-0.00617	277.096		276.644		291.596	-0.0209	290.982		290.896	-0.00248	291.709	0.02992	291.717	-0.05708	290.164	0.06557
288.871	-0.05807	290.661	-0.06279	290.946	-0.04511	297.781	0.04483	277.188	0.04406	276.736		291.688	-0.09007	291.074		290.989		291.802	0.0438	291.809	-0.02612	290.256	0.01654
288.964		290.754	-0.19024	291.039		297.873	0.02727	277.281	0.01232	276.829		291.781	0.03743	291.167	0.03549	291.081		291.894	0.02005	291.901	0.02171	290.363	0.02658
289.056		290.846	-0.00303	291.131	0.00537	297.966		277.373	0.03215	276.917		291.873	-0.01718	291.259	0.0363	291.174	-0.02685	291.987		291.994		290.455	-0.01902
289.149	0.01723	290.939	0.02303	291.224	0.00861	298.058		277.514	-0.01938	277.01		291.965		291.325	0.02556	291.266	-0.00601	292.079		292.087		290.548	-0.03548
289.241	0.02229	291.031		291.382	0.06798	298.151	-0.04009	277.606	0.0131	277.103		292.058		291.418	0.02297	291.332	0.01802	292.172	0.05573	292.179	0.02596	290.64	0.39497
289.334	0.03249	291.124		291.475	-0.03495	298.243	-0.02755	277.699	0.05451	277.195	0.0097	292.151	0.02254	291.51	-0.0333	291.425	0.01616	292.264	0.00659	292.271	0.06614	290.733	0.50138
289.426	0.03619	291.216	0.02026	291.567	-0.07496	298.336		277.791	-0.08121	277.288	-0.01954	292.243	0.03882	291.603		291.517	0.01976	292.357	-0.0524	292.364	0.03782	290.825	-0.10293
289.519	0.08472	291.375	-0.03597	291.66	-8.85345e-05	298.429		277.884	-0.0661	277.38	0.00998	292.335	-0.04445	291.695	-0.11934	291.61	-0.00211	292.449	0.04495	292.456	0.08107	290.918	0.0451
289.611	-0.09786	291.468	0.000821877	291.752	-0.0593	298.531	-0.05879	277.976		277.521	-0.03218	292.428	-0.03028	291.788	0.01774	291.702	-0.03674	292.542	-0.08153	292.549	0.20433	291.01
289.704	-0.08262	291.56	0.05477	291.844	0.03006	298.623	-0.0299	278.069		277.613	0.06147	292.52	-0.06692	291.88	0.07745	291.795	-0.02088	292.634	0.18643	292.641	-0.00396	291.103
289.796	-0.09032	291.653	-0.06938	291.937	0.03515	298.716	-0.05585	278.161	-0.01315	277.706	-0.12068	292.613	-0.02199	291.973		291.887	-0.02691	292.727	-0.002	292.734	-0.18481	291.195	0.04466
289.889	-0.07688	291.745	0.01854	292.029		298.809	-0.0092	278.253	0.02116	277.798	-0.01044	292.705	-0.03338	292.065		291.98		292.819	-0.02001	292.826	-0.01814	291.288	-0.00561
289.981		291.837	0.03906	292.122		298.901	0.03987	278.347	0.00508	277.891	0.03256	292.798	0.04202	292.158	0.05562	292.072		292.912	0.06045	292.919	0.0611	291.354	0.07281
290.074		291.93	0.02378	292.214	0.05685	298.994		278.439	0.01257	277.983		292.89	0.04382	292.25	0.04065	292.165	-0.03324	293.004		293.011		291.446	-0.13952
290.178	0.03326	292.022		292.307	0.00202	299.086		278.532	0.04474	278.076		292.983		292.343	0.05082	292.257	-0.00626	293.097		293.104		291.539	-0.0993
290.27	-0.03171	292.115		292.399	0.01823	299.179	0.03914	278.624	0.02073	278.168	0.03314	293.075		292.435	0.30848	292.35	-0.00379	293.189	-0.02216	293.196	0.11477	291.631	-0.02613
290.377	0.03359	292.207	0.01206	292.492	-0.15852	299.271	-0.01002	278.716	0.00796	278.261	-0.00513	293.168	0.03846	292.528	0.06882	292.442	0.01189	293.282	-0.02676	293.289	0.04714	291.724
290.469	-0.00191	292.3	0.02594	292.584	-0.08563	299.364	-0.000310117	278.824	0.03704	278.354	0.03266	293.26	0.04449	292.62	0.13048	292.535	-0.01018	293.374	0.01315	293.381	0.08402	291.816	0.03097
290.562	0.06574	292.392	-0.03202	292.677	-0.09812	299.456	0.00537	278.917	-0.01165	278.446	0.06499	293.353	0.04929	292.712	-0.06335	292.627	-0.13494	293.467	-0.00507	293.474	0.039	291.909	-0.00020233
290.654	0.038	292.485	-0.00171	292.769	-0.29306	299.549	-0.00502	279.009		278.539	-0.07768	293.445	0.03696	292.805	0.04609	292.72	-0.06757	293.559	-0.0299	293.566		292.001
290.747	-0.02331	292.577	0.46999	292.862	0.06955	299.642	-0.05256	279.102		278.631	0.02064	293.538	0.02227	292.897	0.07128	292.812	-0.01969	293.652	-0.02346	293.659	0.27512	292.094
290.839	-0.00425	292.67	-0.000439487	292.954	0.03279	299.734	-0.03206	279.194		278.724	-0.01026	293.63	-0.0372	292.99		292.905	-0.00649	293.744	0.02245	293.751	-0.17579	292.186	0.06101
290.932	0.01967	292.762	-0.0258	293.047		299.827	-0.04223	279.287		278.832	0.01692	293.723	0.02713	293.082		292.997		293.836	0.02348	293.844	0.06128	292.279	0.04229
291.024		292.855	-0.000363939	293.139	-0.0106	299.919	0.03864	279.359		278.924	0.02776	293.815	0.04203	293.175	0.07272	293.09		293.929	-0.01753	293.936	0.046	292.371	-0.01757
291.117		292.947	0.01955	293.232	0.0372	300.012		279.418	-0.01207	279.017		293.907	0.03838	293.267	0.07321	293.182	-0.03324	294.021		294.028		292.464	0.00265
291.209	-0.03032	293.04		293.324	0.02988	300.104		279.468	0.02792	279.109		294		293.36	0.00309	293.275	-0.01977	294.114		294.121		292.556	-0.13888
291.368	0.01941	293.132	0.02448	293.417	-0.00575	300.197	0.0424	279.519	0.04282	279.202		294.092		293.452	0.15619	293.367	-0.06112	294.206	-0.03222	294.213	0.07665	292.648	-0.01486
291.461	0.05859	293.225	0.06375	293.509	-0.17058	300.289	-0.01858	279.592	-0.01832	279.294		294.185	0.04012	293.545	-0.01109	293.459	0.02603	294.298	0.07157	294.306	0.05926	292.741	0.01852
291.553	0.11815	293.317	0.00254	293.602	-0.1864	300.382	0.00507	279.671	0.01137	279.363		294.277	-0.00727	293.637	-0.11787	293.552	0.00901	294.391	0.02166	294.398	0.01572	292.833	0.02976
291.645	-0.09747	293.41	-0.00556	293.694	-0.02881	300.474	0.00755	279.719	0.02946	279.421	0.02219	294.369	0.01164	293.73	-0.15723	293.644		294.483	0.00723	294.49	0.06007	292.926	0.04852
291.738	-0.08099	293.502	0.03223	293.787	-0.05937	300.567	-0.01245	279.768	0.01689	279.472	-0.05458	294.462	0.0078	293.822	0.01309	293.737	-0.01517	294.576	0.02331	294.583	0.00805	293.018
291.83	0.01805	293.595	-0.06327	293.879	0.05145	300.659	-0.05124	279.816	0.03332	279.523	-0.03123	294.554	0.04257	293.915	0.08299	293.829	0.01212	294.668	0.04812	294.675	0.02886	293.111
291.923	-0.01042	293.687	0.03368	293.971		300.752	-0.04483	279.895	0.05031	279.599	-0.02109	294.647	-0.07799	294.007		293.922	0.06977	294.761	0.03755	294.768	0.02703	293.203	0.03376
292.015		293.779	0.02988	294.064		300.844	-0.05246	279.988		279.674	0.02167	294.739	-0.03663	294.099		294.014		294.853	0.01133	294.86	0.02294	293.296	0.0158
292.108		293.872	0.08534	294.156	0.02197	300.937	0.00153	280.08		279.723	0.01785	294.832	0.01333	294.192	0.00117	294.107		294.945	-0.04598	294.952	0.05353	293.388	-0.00314
292.2	-0.03588	293.964		294.249	-0.01463	301.03		280.173	0.04272	279.771	0.05322	294.924	0.02421	294.284	0.0242	294.199	0.02704	295.038		295.045		293.481	-0.01579
292.293	0.06837	294.057		294.341	-0.03566	301.122		280.265	0.04981	279.82	0.01422	295.016		294.377	0.04253	294.291	0.01897	295.13	-0.02375	295.137	0.04561	293.573	-0.04941
292.385	-0.01383	294.149	0.05075	294.433	0.00458	301.215	-0.01636	280.35	0.02755	279.902	-0.03548	295.109		294.469	-0.00636	294.384	0.03204	295.223	0.05923	295.23	0.0568	293.666	-0.08287
292.478	-0.13548	294.241	-0.01525	294.526	-0.01342	301.307	-0.00407	280.395	0.00238	279.995		295.201	0.01302	294.561	0.01661	294.476	0.01283	295.315	0.02966	295.322	0.02088	293.758	-0.000308263
292.57	-0.19341	294.334	0.05794	294.618	0.03092	301.412	0.02517	280.44	0.04323	280.088		295.294	0.06941	294.654	0.00977	294.569	-0.01204	295.408	0.01006	295.415	0.03144	293.851	0.00172
292.663	-0.25956	294.426	-0.01039	294.711	-0.02671	301.505	0.0049	280.485	-0.00856	280.18	-0.00332	295.386	0.02015	294.746	0.04224	294.661	0.04368	295.5	-0.02558	295.507	0.03554	293.943	0.02122
292.755	-0.07634	294.519	-0.035	294.803	0.02081	301.597	-0.008	280.545	0.01139	280.272	0.06195	295.479	0.02937	294.839	0.06126	294.753	-0.02289	295.593	-0.0127	295.6	0.04922	294.036
292.848	-0.01824	294.611	0.06195	294.896	-0.00963	301.69	-0.02535	280.637	0.01416	280.353	0.02865	295.571	0.04256	294.931	0.04539	294.846	-0.00109	295.685	-0.02164	295.692	0.01538	294.128	0.03448
292.94	-0.10527	294.704	-0.0205	294.988		301.782	0.01578	280.754	-0.02179	280.398	-0.00564	295.664	-0.01135	295.024		294.938	0.00288	295.778	0.05611	295.785	0.00158	294.22	-0.00927
293.033		294.796	0.00567	295.08		301.875	0.01876	280.842	-0.01276	280.443	0.02155	295.756	-0.00553	295.116		295.031		295.87	-0.03942	295.877	0.05773	294.313	-0.01127
293.125		294.888	0.06503	295.173	0.0309	301.967		280.935	0.00695	280.488	0.02293	295.849	0.0616	295.209	0.04106	295.123		295.962		295.969		294.405	0.01965
293.217	-0.05596	294.981		295.265	0.00628	302.06		281.027		280.552	-0.01917	295.941	0.07679	295.301	-0.000680676	295.216	0.02399	296.055		296.062		294.498	0.01837
293.31	-0.01188	295.073		295.358	0.01366	302.152	0.00414	281.12		280.645	0.00109	296.033		295.393	0.11219	295.308	-0.00144	296.159	-0.0034	296.166	0.03088	294.59	0.02925
293.402	-0.07595	295.166	0.000354466	295.45	0.03654	302.245	-0.06079	281.212	0.05741	280.761	0.04812	296.137	0.02708	295.486	0.09266	295.401	0.02111	296.251	-0.01631	296.258	0.03017	294.682	0.04001
293.495	-0.04647	295.258	0.01221	295.543	0.00492	302.337	0.0215	281.305	-0.02802	280.849	0.00775	296.23	0.04581	295.578	0.09142	295.493	-0.02771	296.343	-0.00453	296.351	0.03661	294.775	0.02382
293.587	-0.10659	295.351	0.04173	295.635	0.01809	302.43	-0.03501	281.4	0.02273	280.942	0.01177	296.322	0.09052	295.671	0.01642	295.585	-0.03647	296.436	0.04506	296.443	-0.00222	294.867	0.0157
293.68	-0.07768	295.443	0.02327	295.728	0.05677	302.523	-0.00315	281.492	0.01491	281.034		296.414	0.06789	295.763	-0.00567	295.678	0.02467	296.528	-0.01444	296.536	-0.06396	294.96
293.772	-0.04783	295.536	0.02378	295.82	-0.01891	302.615	0.02543	281.588	0.00849	281.127	0.07837	296.507	0.09765	295.856	0.14622	295.77	0.02989	296.621	-0.0829	296.628	-0.05504	295.052
293.865	-0.02638	295.628	-0.03259	295.912	0.01916	302.708	0.02069	281.683	0.05972	281.219	-0.05006	296.599	0.05919	295.948	0.03332	295.863	0.04978	296.713	-0.04866	296.72	0.01763	295.145	0.01778
293.957	0.09508	295.721	-0.02273	296.005		302.8	-0.03554	281.832	0.03063	281.312	0.06323	296.692	0.01846	296.041		295.955	0.01268	296.806	0.00584	296.813	0.00195	295.237	0.01656
294.05		295.813	-0.01214	296.109		302.893	-0.01855	281.924	-0.02271	281.407	-0.04218	296.784	0.05783	296.144	0.03533	296.048		296.898	-0.03646	296.906	-0.01851	295.329	0.04516
294.142	0.04676	295.905	-0.02909	296.201	0.02254	302.985		282.017		281.503	0.05921	296.877	0.02702	296.237	0.00174	296.151	0.02892	296.991		296.998		295.422	0.01769
294.234	0.0408	295.998		296.294	0.05236	303.078		282.109		281.595	0.03132	296.969		296.329	0.02977	296.244	-0.00117	297.083		297.091		295.514	0.05382
294.327	-0.03863	296.102		296.386	-0.03269	303.17	0.00129	282.202	0.02669	281.69	0.01727	297.062		296.422	0.000960444	296.336	0.03468	297.176	-0.06636	297.183	0.0322	295.607	0.02181
294.419	-0.03145	296.194	0.01889	296.479	-0.02496	303.263	0.03049	282.343	-0.0117	281.839	-0.00764	297.155	0.01505	296.514	-0.02406	296.429	-0.0403	297.268	0.03188	297.276	-0.02566	295.699	0.00559
294.512	0.08557	296.286	0.05164	296.571	-0.06384	303.355	0.00628	282.435	0.03758	281.931	0.0728	297.247	0.06061	296.607	0.000444527	296.521	-0.01139	297.361	-0.02035	297.368	0.03795	295.792	0.02589
294.604	-0.07289	296.379	0.05254	296.663	-0.03374	303.448	-0.09262	282.528	0.000648305	282.024		297.34	0.02541	296.699	-0.01967	296.614	0.01014	297.453	-0.00485	297.461	-0.00489	295.884	0.06608
294.696	0.0458	296.471	0.01477	296.756	-0.07424	303.54	0.01666	282.62	-0.00734	282.116		297.432	-0.00282	296.792	-0.04485	296.706	4.51692e-05	297.546	-0.01695	297.553	-0.02985	295.977
294.789	-0.05183	296.564	0.00117	296.849	-0.0158	303.633	0.04404	282.719	-0.00788	282.209	0.04508	297.525	0.02343	296.884	0.03453	296.799	-0.02284	297.638	0.00347	297.645	-0.00905	296.069
294.881	0.02138	296.656	-0.08308	296.941	-0.00915	303.725	0.05005	282.811	0.02265	282.35	-0.06922	297.617	0.01877	296.977		296.891	0.00431	297.731	0.00185	297.738	0.00239	296.173	0.07444
294.974		296.749	-0.01231	297.034		303.818	-0.03231	282.904	0.04681	282.442	0.01366	297.709	-0.01007	297.069		296.984		297.823	-0.01872	297.831	-0.03389	296.265	-0.00321
295.066		296.841	-0.03729	297.126	0.00726	303.91	0.03506	282.996		282.535	-0.03468	297.802	-0.0077	297.162	0.02771	297.076		297.916	0.01392	297.923	0.0072	296.358	0.03579
295.159	0.00566	296.934	-0.000286252	297.219	-0.05561	304.003		283.089		282.627	0.02491	297.894	0.04786	297.254	0.04385	297.169	-0.0453	298.008		298.016		296.45	0.00998
295.251	0.02271	297.026		297.311	-0.01248	304.095		283.182	0.02208	282.726	0.01573	297.987		297.347	0.00785	297.261	0.00751	298.101		298.108		296.543	-0.03359
295.344	-0.05182	297.119		297.404	0.04277	304.188	0.0558	283.274	-0.04213	282.818	0.01064	298.08		297.439	0.0032	297.354	-0.0416	298.194	0.0037	298.201	-0.02195	296.635	0.0442
295.436	-0.07294	297.211	0.00612	297.496	0.02552	304.28	0.0696	283.366	0.00632	282.911	0.01231	298.172	0.04303	297.532	-0.01594	297.446	-0.01587	298.286		298.293		296.728	0.07113
295.528	-0.06809	297.304	0.07377	297.589	0.02941	304.373	0.02637	283.459	-0.01783	283.004		298.265	0.44509	297.624	0.000288846	297.539	-0.00933	298.379		298.386		296.82	-0.10644
295.621	-0.07406	297.396	-0.02194	297.681	0.01524	304.465		283.552	-0.00408	283.096		298.357		297.717	0.01573	297.631	-0.07638	298.471		298.478		296.913	0.00372
295.713	-0.09454	297.489	0.00206	297.774	-0.00183	304.558		283.644	-0.00263	283.189	0.02492	298.45		297.809	0.0594	297.724	-0.04595	298.574	-0.01126	298.581	-0.04218	297.005
295.806	-0.03954	297.581	0.02935	297.866	-0.02876	304.65		283.737	0.04623	283.281	-0.00643	298.552	0.10008	297.902	-0.04047	297.816	0.03581	298.666	0.00292	298.673	-0.00846	297.098
295.898	-0.01313	297.674	0.01575	297.959	-0.01593	304.743		283.829	0.02603	283.374	-0.02262	298.645	0.08628	297.994		297.909	-0.0191	298.759	-0.02906	298.766	-0.04167	297.19	0.01242
295.991		297.766	-0.00973	298.051		304.835		283.922	0.01236	283.466	0.03242	298.737	-0.00677	298.087		298.001		298.851	0.01375	298.859	0.00568	297.283	0.04373
296.094		297.859	-0.02915	298.144	-0.0352	304.928		284.014		283.559	-0.02524	298.83	0.02714	298.179	0.03635	298.094		298.944	0.00314	298.951	-0.04221	297.375	0.02399
296.187	0.01419	297.951	-0.00113	298.236	-0.02701	305.02		284.107		283.651	-0.02379	298.923	0.00343	298.272		298.186	0.00452	299.037		299.044		297.468	-0.01523
296.279	0.05181	298.044		298.329		305.113		284.199	-0.00184	283.744	-0.03607	299.015		298.364		298.279		299.129	-0.0171	299.136	-0.01923	297.56	-0.01798
296.372	0.00624	298.136	-0.01007	298.421		305.206		284.292	-0.01133	283.836	-0.03286	299.108		298.457		298.372		299.222	0.04575	299.229	0.00598	297.653	-0.00211
296.464	-0.00454	298.229	-0.00331	298.524	0.000592165	305.298		284.384	0.01313	283.929	0.01429	299.2	0.05795	298.559	0.02053	298.464		299.314	0.00732	299.321	-0.00556	297.745	-0.02513
296.557	-0.0831	298.322		298.616	0.00969	305.391		284.477	0.02066	284.021		299.293	-0.00383	298.652	-0.04608	298.567	-0.05015	299.407	0.03174	299.414	0.01264	297.838	0.00514
296.649	-0.03437	298.414		298.709	-0.05707	305.483		284.569	-0.01375	284.114		299.385	0.03361	298.745	0.04364	298.659	-0.0624	299.499	-0.03247	299.506	-0.04568	297.93	-4.24214e-05
296.742	-0.03775	298.517	-0.03843	298.801	-0.01855	305.589	0.18647	284.662	0.0459	284.206	-0.01714	299.478	0.04965	298.837	0.10861	298.752	-0.05473	299.592	-0.10778	299.599	-0.00775	298.023
296.834	-0.02499	298.609	0.01512	298.894	-0.02248	305.681	0.23567	284.754	-0.01626	284.299	0.000475411	299.57	0.03357	298.93	0.05503	298.844	-0.0257	299.684	-0.02839	299.691	-0.0335	298.115
296.927	-0.00867	298.702	-0.05401	298.987		305.774	0.25355	284.847	0.02775	284.391	0.04063	299.663	0.00247	299.022		298.937	0.01911	299.777	0.00443	299.784	-0.02823	298.208	0.05488
297.019		298.794	-0.01488	299.079		305.866	0.19001	284.939	0.01941	284.484	0.01046	299.755	0.06435	299.115		299.029		299.869	-0.0327	299.877	-0.01444	298.3
297.112		298.887	0.01489	299.172	0.01876	305.959		285.032		284.576	0.0115	299.848	0.0491	299.207	0.02833	299.122		299.962		299.969		298.393
297.204	0.000655295	298.979		299.264	0.03799	306.051		285.149	0.01575	284.669	0.01826	299.94	0.03253	299.3	0.05559	299.214	-0.01966	300.054		300.062		298.486
297.297	-0.0431	299.072		299.357	0.03091	306.144	0.18875	285.242	0.04027	284.761	0.03141	300.033		299.392	0.03831	299.307	-0.02185	300.147	-0.02581	300.154	-0.03031	298.588	0.01489
297.389	-0.03056	299.165	0.00284	299.449	-0.064	306.237	0.14975	285.334	0.02352	284.854	0.0153	300.126	0.02988	299.485	-0.01817	299.4	-0.0444	300.24	-0.04023	300.247	-0.01452	298.68	-0.01439
297.482	-0.02467	299.257	-0.00732	299.542	0.03232	306.329	0.10853	285.427	-0.01398	284.946	0.03842	300.218	0.03035	299.577	-0.00715	299.492	-0.01422	300.332	0.00482	300.339	-0.000564079	298.773	0.00124
297.574	0.00796	299.35	0.04682	299.634	-0.00619	306.422	0.19399	285.519	-0.00439	285.039		300.311	0.02438	299.67	-0.01117	299.585	-0.05816	300.425	-0.04692	300.432	-0.01003	298.866	-0.04102
297.667	0.02418	299.442	0.00137	299.727	-0.07443	306.514	0.24963	285.612	-0.05368	285.156	-0.01314	300.403	0.01857	299.763	-0.01133	299.677	-0.07042	300.517	0.02932	300.524	-0.06335	298.958	0.02254
297.759	-0.0257	299.535	-0.0538	299.819	-0.02865	306.607	0.26438	285.704	-0.0301	285.249	-0.01797	300.496	0.05219	299.855	0.00971	299.77	-0.0877	300.61	-0.00952	300.617	0.01422	299.051
297.852	0.05589	299.627	-0.03326	299.912	-0.01658	306.699	0.24578	285.797	0.0639	285.341	-0.01375	300.588	0.01435	299.948	-0.02122	299.862	-0.00408	300.702	-0.00291	300.709	-0.03316	299.143	0.0215
297.944	-0.01593	299.72	-0.02388	300.005		306.791	0.21794	285.89	0.0099	285.434	-0.01414	300.681	-0.00374	300.04		299.955	-0.05461	300.795	0.0545	300.802	-0.03262	299.236	0.03515
298.037		299.812	-0.00747	300.097		306.884	0.17779	285.982		285.527	-0.02454	300.773	0.0034	300.133	0.01364	300.047		300.887	-0.04443	300.894	-0.02569	299.328	0.06173
298.129	-0.0445	299.905	-0.0274	300.19	0.01466	306.977		286.075		285.619	0.0641	300.866	-0.01837	300.225	0.02497	300.14	-0.000563704	300.98		300.987		299.421	0.03291
298.222	-0.11525	299.997		300.282	-0.00253	307.069		286.167	0.0387	285.712	-0.0314	300.958	0.00321	300.318	0.00152	300.232	-0.04478	301.072		301.08		299.513	-0.02002
298.315		300.09		300.375	0.05613	307.162	0.16699	286.26	-0.01013	285.804	0.01326	301.051		300.41	0.00114	300.325	-0.02997	301.165	-0.01007	301.172	0.00425	299.606	-0.02928
298.407		300.183	-0.02077	300.467	0.01514	307.254	0.1229	286.352	-0.00599	285.897	0.01618	301.144	0.02869	300.503	-0.00673	300.417	-0.02157	301.257	0.07803	301.265	-0.03255	299.699	-0.03062
298.51		300.275	0.02566	300.56	0.03917	307.347	0.18017	286.444	-0.00554	285.989		301.236	0.02515	300.595	-0.01269	300.51	-0.02797	301.35	-0.00442	301.357	0.01134	299.791	-0.0202
298.602	-0.01284	300.368	0.000765543	300.652	0.00555	307.439	0.22283	286.537	0.00791	286.082		301.329	0.00855	300.688	-0.03747	300.602	-0.04681	301.455	-0.05687	301.462	0.01547	299.884	0.04448
298.695	-0.10482	300.46	-0.00853	300.745	-0.00766	307.532	0.22131	286.629	-0.12912	286.174	0.03178	301.434	-0.02021	300.78	-0.03416	300.695	-0.03005	301.548	-0.00636	301.555	0.00759	299.976
298.787	-0.02837	300.553	-0.00533	300.837	0.00157	307.624	0.17505	286.722	-0.12424	286.267	0.01992	301.526	0.03922	300.873	0.03067	300.788	-0.02927	301.64	-0.06119	301.647	-0.01571	300.069
298.88	-0.01531	300.645	-0.03058	300.93	-0.02879	307.717	0.19976	286.814	-0.04053	286.359	0.03315	301.619	0.00529	300.966		300.88	-0.03981	301.733	0.0093	301.74	-0.01754	300.161	0.01548
298.972		300.738	-0.00451	301.022		307.809	0.19351	286.907	0.03136	286.452	-0.04658	301.711	-0.02102	301.058		300.973		301.825	-0.00401	301.832	-0.04576	300.254	0.03614
299.065		300.83	-0.00311	301.115		307.902	0.19529	286.999		286.544	-0.01487	301.804	0.06099	301.151	0.02058	301.065		301.918	0.02981	301.925	-0.04794	300.346	0.0195
299.157	0.01659	300.923	-0.02413	301.208	-0.00286	307.994		287.092		286.637	0.01827	301.896	-0.01346	301.243	-0.01852	301.158	-0.042	302.01		302.017		300.439	0.04803
299.25	-0.00942	301.015		301.3	-0.01803	308.087		287.184	0.00458	286.729	-0.03926	301.989		301.336	-0.03242	301.25	-0.01426	302.103		302.11		300.531	-0.04121
299.343	-0.07505	301.108		301.405	0.00391	308.18	0.15344	287.277	0.00681	286.822	-0.01711	302.081		301.441	0.0104	301.343	-0.0408	302.195	-0.00615	302.202	-0.01403	300.624	-0.04827
299.435	-0.03307	301.2	0.03838	301.498	-0.02028	308.272	0.19742	287.369	-0.0084	286.914	0.05865	302.174	0.08437	301.533	-0.00104	301.448	0.00154	302.288	-0.02018	302.295	0.03443	300.716	0.0238
299.528	-0.10159	301.293	0.000745235	301.59	0.0489	308.365	0.15976	287.462	0.04062	287.007		302.266	0.03208	301.626	-0.01853	301.54	-0.08714	302.38	0.0249	302.387	-0.01207	300.809	0.00323
299.62	-0.06009	301.398	-0.00582	301.683	0.03828	308.457	0.23351	287.554	-0.01791	287.099		302.359	0.00977	301.718	0.02535	301.633	-0.04046	302.473	0.03141	302.48	-4.55941e-05	300.901	0.03726
299.713	-0.05639	301.491	-0.10416	301.775	-0.0071	308.55	0.30177	287.647	0.11176	287.192	0.04009	302.451	-0.00661	301.811	0.04873	301.725	-0.02978	302.565	-0.00192	302.572	0.02569	300.994
299.805	-0.05381	301.583	-0.1032	301.868	0.0225	310.44	0.06616	287.739	-0.05836	287.284	-0.00117	302.544	0.07374	301.903	0.0057	301.818	-0.0137	302.658	-0.01098	302.665	-0.01057	301.087
299.898	0.00671	301.675	-0.01086	301.96		310.532	0.03384	287.832		287.377	-0.00638	302.636	0.00344	301.996		301.91	-0.00857	302.75	0.03801	302.758	-0.00936	301.179	0.03139
299.99		301.768	0.01341	302.053		310.625	0.01078	287.924		287.469	0.01266	302.729	0.01718	302.088		302.003		302.843	0.04071	302.85	-0.06307	301.272	0.01445
300.083		301.861	-0.01494	302.145	-0.01053	321.528	0.00564	288.016		287.561	0.0641	302.821	0.03065	302.181	0.00535	302.096		302.935	0.01225	302.943	-0.02316	301.364	-0.07081
300.175	-0.02522	301.953	-0.0105	302.238	0.02319	321.712	0.000424605	288.067		287.654	0.0567	302.914	0.04435	302.273	0.000131096	302.188	0.02595	303.028		303.035		301.469	-0.01907
300.268	0.04714	302.046		302.33	0.06719	321.897	0.00166	288.159		287.746	0.02564	303.007		302.366	0.07693	302.281	-0.0214	303.121		303.128	-0.00664	301.562	-0.01029
300.36	0.02669	302.138	-0.01723	302.423	0.00677	322.081		288.252		287.839		303.099		302.459	0.01923	302.373	-0.03775	303.213	0.02963	303.22	-0.00862	301.654	-0.01911
300.453	-0.04596	302.231	-0.0132	302.515	-0.02347	322.266	0.00323	288.344		287.931		303.192	-0.00115	302.551	0.01482	302.466	-0.04672	303.306	0.0484	303.313	0.02658	301.747	0.02037
300.545	-0.06102	302.323	-0.04375	302.608	0.02974	322.444	0.00621	288.437		288.024		303.284	0.15329	302.644	0.0297	302.558	-0.0586	303.398	0.04454	303.405	-0.06095	301.839	0.03907
300.638	0.01059	302.416	0.02791	302.701	0.00644	322.586	0.00227	288.529	0.02788	288.074		303.377	0.18505	302.736	0.03242	302.651	0.0085	303.491	-0.01078	303.498	0.01231	301.932	0.02341
300.73	-0.10083	302.508	-0.04454	302.793	0.06035	322.727	0.00446	288.622	-0.15912	288.166		303.469	0.06696	302.829	0.02677	302.743	-0.02359	303.583	0.02043	303.59	-0.01846	302.024
300.823	-0.10475	302.601	0.02318	302.886	0.02406	322.869	0.00338	288.714	-0.08954	288.259		303.562	0.13493	302.921	-0.02231	302.836	0.0095	303.676	0.01188	303.683	0.0675	302.117
300.916	-0.03999	302.693	0.01158	302.978		323.011		288.807	-0.02663	288.351		303.654	0.09295	303.014		302.928	-0.01188	303.768	-0.02019	303.775	-0.03416	302.209	0.01483
301.008		302.786	-0.0062	303.071		323.152	0.00506	288.899	0.03061	288.444		303.747	0.08776	303.106		303.021		303.861	-0.0243	303.868	0.02735	302.302	-0.0138
301.101		302.878	-0.02149	303.163	0.0398	323.294	0.00626	288.992		288.536	-0.01525	303.839	0.05355	303.199	0.03664	303.113		303.953	-0.00857	303.96		302.395	0.0017
301.193	-0.00727	302.971		303.256	0.05656	323.436	0.00796	289.085		288.629	-0.02631	303.932	0.06698	303.291	0.05093	303.206	-0.07214	304.046		304.053		302.487	-0.02291
301.286	0.00848	303.063		303.348	0.10266	323.492	-0.07432	289.177	0.056	288.721	0.92721	304.024		303.384	0.04916	303.298	-0.01645	304.138	0.02575	304.145	0.07025	302.58	0.01717
301.391	-0.00294	303.156	0.00717	303.441	0.06499	323.584	-0.0802	289.27	0.03795	288.814	0.63098	304.117		303.476	0.03302	303.391	-0.01568	304.231	0.02603	304.238	0.02735	302.672	0.01663
301.483	-0.00831	303.249	-0.0338	303.533	0.03049	323.677	-0.03492	289.362	0.02265	288.907	0.00369	304.209	0.11779	303.569	0.00982	303.483	-0.06985	304.323	0.01148	304.33	0.03192	302.765	-0.04665
301.576	-0.00152	303.341	-0.04416	303.626	0.1086	323.77	0.00201	289.455	0.28756	288.999		304.302	0.11786	303.661	0.0011	303.576	0.00742	304.416	0.02088	304.423	0.02037	302.857	-0.03203
301.668	-0.02135	303.434	0.00436	303.718	-0.03889	323.862	-0.01011	289.547	-0.01996	289.092		304.394	0.17492	303.754	0.06057	303.668	-0.05976	304.508		304.515		302.95	-0.01747
301.761	-0.06474	303.526	-0.06858	303.811	0.03244	323.955	0.00403	289.64	0.53228	289.184	0.00764	304.487		303.846	-0.02159	303.761	-0.02155	304.601		304.608		303.042
301.853	0.04987	303.619	-0.03398	303.903	0.05209	324.047		289.732	-0.04866	289.277	0.09621	304.579		303.939	0.000143962	303.853	-0.02863	304.693		304.7		303.135	-0.05302
301.946	-0.02227	303.711	-0.02445	303.996		324.14	0.02785	289.825	0.0522	289.369	-0.05079	304.672		304.031		303.946	-0.05104	304.786		304.793		303.227	0.03782
302.038		303.804	-0.00736	304.088		324.232	-0.000707249	289.917	0.04867	289.462	0.06067	304.764		304.124		304.038		304.878		304.885		303.32	-0.04158
302.131	0.03491	303.896	-0.00249	304.181	-0.00935	324.325	0.01754	290.01		289.554	-0.52573	304.857		304.216	0.04423	304.131	-0.02181	304.971		304.978		303.412	0.05728
302.224	0.05187	303.989		304.273	0.06614	324.417	-0.00462	290.102		289.647	-0.12509	304.949		304.309	0.000937464	304.223	0.01699	305.063		305.07		303.505	-0.02222
302.316	-0.00794	304.081		304.366	0.0119	324.51	-0.02124	290.206	0.04017	289.739	0.03833	305.042		304.401	0.03705	304.316	0.00013311	305.156		305.163		303.597	0.00798
302.409	-0.01775	304.174	0.0123	304.458	-0.03308	324.602	-0.05191	290.313	0.04605	289.832	0.01518	305.134		304.494		304.408	-0.03545	305.248		305.256		303.69	-0.03165
302.501	0.06076	304.266	0.00212	304.551		324.695	-0.03879	290.405	0.02373	289.924	0.03331	305.227		304.586		304.501		305.341		305.348		303.782	-0.00416
302.594	-0.00354	304.359	0.02527	304.643		324.787	-0.00276	290.498	0.0462	290.017		305.32		304.679		304.593		305.433		305.44		303.875	-0.01327
302.686	0.0047	304.451	0.03793	304.736		324.88	-0.02007	290.59	0.01018	290.109		305.412		304.771		304.686		305.526	-0.01137	305.533	-0.02673	303.967
302.779	-0.0779	304.544		304.828		324.972		290.683	-0.08287	290.213	0.04326	305.504		304.864		304.779		305.632	0.1223	305.639	0.14424	304.06
302.871	0.01179	304.636		304.921		325.065		290.775	-0.00794	290.32	-0.01503	305.61	0.20008	304.956		304.871		305.724	0.1547	305.731	0.09823	304.152	0.02256
302.964		304.729		305.013		325.158	0.03434	290.868	0.0558	290.412	0.0204	305.703	0.16999	305.049		304.964		305.817	0.122	305.824	0.08371	304.245	-0.0018
303.056		304.821		305.106		325.25	0.00173	290.96		290.505	0.02209	305.795	0.14522	305.142		305.056		305.909	0.11201	305.916	0.07072	304.337	-0.000145342
303.149	0.0615	304.914		305.199		325.343	0.04322	291.053		290.597	0.46368	305.888	0.18427	305.234		305.149		306.002		306.009		304.43	-0.01848
303.241	0.07022	305.006		305.291		325.435	0.01488	291.145	0.06158	290.69	0.02511	305.98		305.327		305.241		306.094		306.101		304.522
303.334	0.0036	305.099		305.384		325.528	-0.1527	291.238	-0.01217	290.782	0.22327	306.073		305.419		305.334		306.187	0.10283	306.194	0.06523	304.615
303.426	0.00881	305.191		305.476		325.63	-0.01028	291.304	-0.02184	290.875	0.13024	306.165	0.09923	305.512		305.426		306.279	0.09104	306.286	0.07101	304.707
303.519	0.01189	305.284		305.582	-0.0437	325.723	0.00958	291.397	0.000288632	290.967		306.258	0.093	305.617	0.18603	305.519		306.372	0.0642	306.379	0.08699	304.8
303.611	-0.03298	305.376		305.674	0.0718	325.815	0.05723	291.489	-0.0199	291.06		306.35	0.12232	305.71	0.16077	305.624	-0.05916	306.464	0.06661	306.471	0.11529	304.892
303.704	0.02647	305.469		305.767	0.04343	325.908	0.05763	291.581	0.01208	291.152	0.01741	306.443	0.13836	305.802	0.11574	305.717	-0.10103	306.557	0.17016	306.564	0.1126	304.985
303.796	-0.06571	305.575	0.06696	305.859	0.0335	326		291.674	0.01026	291.245	0.05043	306.535	0.09898	305.895	0.08292	305.809	-0.08489	306.649	0.26515	306.656	0.10573	305.077
303.889	0.06768	305.667	0.05005	305.952	0.0617	326.093		291.766	-0.02447	291.311	0.0819	306.628	0.16998	305.987		305.902	-0.04184	306.742	0.18814	306.749	0.07621	305.17
303.981		305.759	0.07149	306.044		326.185		291.859	0.01335	291.404	0.02764	306.72	0.09555	306.08		305.995		306.834	0.11634	306.841	0.0764	305.263
304.074		305.852	0.04105	306.137	0.05149	326.278		291.951	-0.07219	291.496	-0.2077	306.813	0.14408	306.173	0.10121	306.087		306.927	0.10818	306.934	0.18429	305.355
304.166	0.1038	305.945	0.05821	306.229	0.01248	326.371	0.02406	292.044		291.589	-0.02746	306.905	0.05274	306.265	0.10533	306.18	-0.0078	307.019		307.026		305.448
304.259	-0.00189	306.037		306.322	0.07467	326.463	0.02909	292.136	-0.00174	291.681	0.00562	306.998		306.358	0.09081	306.272	-0.06429	307.112		307.119		305.54	-0.0753
304.351	0.06722	306.13	0.05463	306.414	0.04974	326.556	0.05737	292.229	-0.01922	291.773	0.00881	307.091		306.45	0.08383	306.365	-0.04666	307.204	0.02545	307.212	0.04498	305.646	-0.10415
304.444	-0.04471	306.222	0.02199	306.507	0.08708	326.648	-0.00835	292.321	0.000662426	291.866	-0.00957	307.183	0.09014	306.543	0.1185	306.457	-0.05969	307.297	0.06461	307.304	0.03625	305.738	-0.04512
304.536		306.315	0.09294	306.599	0.10225	326.741	0.02193	292.414	-0.00736	291.958	0.05203	307.276	0.06136	306.635	0.14078	306.55	-0.06057	307.39	0.14067	307.397	0.09781	305.831	-0.02955
304.629		306.407	0.06887	306.692	0.07562	326.833	-0.00345	292.506	0.18874	292.051		307.368	0.05832	306.727	0.1299	306.642	-0.04243	307.482	0.04184	307.489	0.05637	305.923	-0.03576
304.722		306.5	0.06162	306.784	0.10487	326.926	0.10177	292.599	0.07912	292.143	-0.01634	307.461	0.13485	306.82	0.09087	306.735	-0.08664	307.575	0.12944	307.582	0.05591	306.016
304.814		306.592	0.06831	306.877	0.04807	327.018		292.691	-0.01541	292.236	0.00777	307.553	0.10986	306.912	0.09842	306.827	0.01216	307.667	0.17987	307.674	0.09082	306.108
304.907		306.685	0.05218	306.969		327.111		292.784	0.03287	292.328	0.04457	307.646	0.13192	307.005		306.92	-0.06368	307.76	0.10828	307.767	0.08864	306.201	-0.01449
304.999		306.777	0.12753	307.062		327.203	0.03448	292.876	0.04995	292.421	0.0164	307.738	0.07006	307.098		307.012		307.852	0.0921	307.859	0.083	306.294	-0.02874
305.092		306.87	0.15439	307.155	0.05314	327.296	0.0387	292.969		292.513	0.02587	307.831	0.09408	307.19	0.04765	307.105		307.945	0.08478	307.952	0.09588	306.386	-0.02835
305.184		306.962		307.247	0.06139	327.388	0.00801	293.061		292.606	-0.17896	307.923	0.07688	307.283	0.06949	307.197	-0.02785	308.037		308.044		306.479	-0.03871
305.277		307.055		307.34	0.07919	327.481	0.00389	293.154	0.02899	292.698	-0.3052	308.016		307.375	0.0397	307.29	-0.01513	308.13	0.05865	308.137	0.06515	306.571	-0.04002
305.369		307.147	0.12528	307.432	0.08559	327.573	0.03365	293.246	0.02519	292.791	0.01541	308.108		307.468	0.09423	307.382	-0.05423	308.222	0.08206	308.229	0.08022	306.663	-0.06209
305.462		307.24	0.07101	307.525	0.08469	327.67	-0.04775	293.338	0.03733	292.883	-0.02719	308.201	0.13545	307.56	0.12044	307.475	-0.08204	308.315	0.0358	308.322	0.09904	306.756	-0.04188
305.567	0.17579	307.333	0.07434	307.617	0.08422	327.762	0.08215	293.431	0.03053	292.976		308.293	0.06874	307.653	0.09488	307.567	-0.10523	308.407	0.05383	308.414	0.01762	306.848	0.0373
305.66	0.19888	307.425	0.10047	307.71	0.11204	327.855	0.03142	293.523	0.29796	293.068		308.386	0.05802	307.745	0.18839	307.66	-0.00441	308.5	0.05724	308.507	0.08586	306.941	-0.01101
305.752	0.13982	307.518	0.08418	307.802	0.08701	327.948	0.07304	293.616	-0.10934	293.161	-0.02422	308.478	0.09845	307.838	0.14821	307.752	-0.03419	308.592	0.07237	308.599	0.0825	307.034
305.845	0.16298	307.61	0.11584	307.895	0.07912	328.04		293.708	-0.02856	293.253	-0.01872	308.571	0.13427	307.93	0.08698	307.845	-0.07006	310.482	0.33264	310.49	0.01136	307.126	-0.03381
305.937	0.09504	307.703	0.12009	307.987		328.133	0.02586	293.801	0.00166	293.346	0.00945	310.461	0.03426	308.023		307.937	-0.04045	310.575	0.09943	310.582	-0.02439	307.219	-0.03393
306.03		307.795	0.07931	308.08		328.225	0.04447	293.893	0.08	293.438	0.01485	310.554	0.00385	308.115		308.03		310.667	0.16212	310.674	-0.0252	307.311	-0.0566
306.123		307.888	0.06376	308.172	0.1187	328.326	0.05067	293.986		293.531	0.01511	310.646	0.02304	308.208	0.18624	308.123		323.535	-0.13883	323.542	-0.16561	307.404	-0.04698
306.215	0.12255	307.98		308.265	0.06456	328.418		294.078		293.623	-0.06733	323.513	0.12526	308.301	0.17635	308.215	0.04936	323.627	-0.08578	323.634	-0.11696	307.496	-0.05017
306.308	0.09175	308.073		308.358	0.05876	328.511		294.17	-0.02797	293.715	-0.22246	323.606	0.18958	308.393	0.28344	308.308	-0.014	323.72	-0.05879	323.727	-0.141	307.589	-0.05992
306.4	0.10275	308.165	0.12612	308.45	0.08069	328.603		294.263	0.01259	293.808	0.04112	323.698	0.17694	308.486	0.33117	308.4	-0.06564	323.812	-0.05976	323.819	-0.07899	307.681	-0.08149
306.493	0.12921	308.258	0.01717	308.542	0.11888	328.696		294.355	0.00764	293.9	-0.01623	323.791	0.22967	308.578	0.29652	308.493	-0.04213	323.905	-0.06768	323.912	-0.04543	307.774	-0.01398
306.585	0.08784	308.35	0.06253	310.433		328.783		294.448	-0.01535	293.993		323.883	0.08427	310.468	0.00613	308.585	-0.08992	323.997		324.005		307.866	0.01534
306.678	0.13708	308.443	0.10218	310.525	0.15678	328.876		294.54	-0.01238	294.085		323.976		310.561	0.16242	310.475	0.03644	324.09		324.097		307.959
306.77	0.16065	308.535	0.09167	310.618	0.10187	328.969		294.632	0.03053	294.178	0.04151	324.068		310.653	0.07437	310.568	0.04893	324.182	-0.02439	324.19	-0.07938	308.051
306.863	0.19898	310.425		323.485	0.01953	329.061		294.725	0.00782	294.27	0.00347	324.161	0.03088	321.587	-0.000443712	310.66	0.03858	324.275	-0.03906	324.282	-0.05735	308.144	-0.00562
306.955	0.16218	310.518	-0.0349	323.577	0.05228	329.154		294.817	-0.03242	294.362	-0.019	324.254	0.08236	321.771	0.000270944	321.624	0.00431	324.368	-0.0597	324.375	-0.06471	308.237	0.00138
307.048		310.61	-0.00594	323.67	0.0754	329.246		294.91	0.01314	294.455	-0.00797	324.346	0.03217	321.956	0.000710246	321.808	0.00125	324.46	-0.03549	324.467	-0.05236	308.329	-0.02474
307.14	0.09708	323.478	-0.07827	323.762	0.0402	329.339		295.002		294.547	-0.01542	324.439	0.00457	322.14	0.00081406	321.993		324.553	-0.04151	324.56	-0.11572	308.422	-0.04408
307.233	0.13876	323.57	-0.14816	323.855	0.1144	329.434	0.04389	295.095		294.64	-0.02244	324.531	0.03037	322.325	0.00106	322.177	0.00131	324.645	-0.03731	324.652	-0.12336	308.514	-0.06538
307.325	0.12218	323.663	-0.21717	323.948	0.05545	329.527	0.02848	295.187	0.02074	294.732	0.01132	324.624	-0.00534	322.489	0.00355	322.361	0.00392	324.738	-0.00302	324.745	-0.07967	308.607	-0.07469
307.418	0.11038	323.755	-0.1238	324.04		329.619	0.05671	295.28	0.00641	294.824	0.04	324.716	0.0096	322.63	0.00246	322.511	0.00242	324.83	-0.04531	324.837	-0.04408	310.497	0.09367
307.511	0.1465	323.848	-0.12155	324.133	-0.00125	329.831	0.04073	295.372	0.00807	294.917	0.00698	324.809	0.04158	322.772	0.00015243	322.653	0.000776682	324.923	-0.03247	324.93	0.00221	310.589	-0.11553
307.603	0.21648	323.94	-0.15333	324.225	0.02262	329.924	0.1452	295.464	0.02773	295.009		324.901	0.06519	322.914	-0.000739343	322.795	-0.000178808	325.015		325.022		310.682	-0.05351
307.695	0.19347	324.033		324.318	0.08584	330.016		295.557	0.03842	295.102		324.994		323.056		322.936	0.00214	325.108		325.115		321.646	0.00252
307.788	0.18117	324.125	-0.11298	324.41	0.09114	330.109		295.649	-0.01065	295.194	0.04162	325.086		323.197	0.00178	323.078		325.2	-0.03042	325.207	-0.03203	321.831	0.000461285
307.88	0.14247	324.218	-0.06775	324.503	0.07227	330.202		295.742	-0.01799	295.287	0.06558	325.179	0.03575	323.339	0.000214106	323.22	0.00231	325.293	0.00834	325.3	-0.02583	322.015
307.973		324.31	-0.0321	324.595	-0.07987	330.298	0.08171	295.834	0.02039	295.379	-0.03412	325.271	-0.00201	323.52	-0.07933	323.362	0.00124	325.385	-0.03157	325.392	-0.03258	322.199	0.000760964
308.066		324.403	0.02334	324.688	0.08674	330.508	0.02165	295.927	0.03842	295.472	0.0084	325.364	0.0506	323.613	-0.01478	323.528	-0.11402	325.478	-0.067	325.485	-0.03453	322.384	0.00472
308.158	0.10113	324.496	-0.03915	324.78	0.06421	330.588	0.14868	296.019		295.564	-0.05747	325.456	0.06073	323.705	-0.02254	323.62	-0.12667	325.57	-0.12137	325.578	-0.06149	322.534	0.00603
308.251	0.12075	324.588	-0.08995	324.873	0.08406	330.681	0.08798	296.123		295.656	-0.04321	325.549	0.00427	323.798	-0.03774	323.713	-0.09597	325.673	-0.01219	325.68	-0.07399	322.675	0.00242
308.343	0.15562	324.681	-0.0397	324.965		330.775	0.09009	296.215	-0.03287	295.749	-0.00529	325.651	0.05209	323.891	-0.05821	323.805	-0.06186	325.765	0.00725	325.772	-0.03548	322.817	-0.000727969
308.436	0.11964	324.773	-0.10592	325.058		330.868	0.11618	296.308	0.02167	295.841	-0.04234	325.744	0.00516	323.983		323.898	-0.03181	325.858	-0.04161	325.865	-0.02645	322.959
308.528	0.1964	324.866	-0.06575	325.15	0.06922	330.96		296.4	0.00541	295.934	0.08802	325.836	0.07906	324.076		323.99		325.95	0.00466	325.958	-0.04032	323.101
310.413		324.958	-0.05054	325.243	0.0745	331.053		296.493	-0.01592	296.026		325.929	0.07858	324.168	-0.01551	324.083		326.043		326.05		323.242	0.00125
310.418		325.051		325.335	0.0878	331.146	0.02773	296.585	-0.03305	296.13	0.01437	326.022		324.261	-0.01285	324.175	-0.02749	326.136		326.143		323.384	0.0013
310.511	0.17297	325.143	-0.02054	325.428	0.11248	331.238	0.06485	296.678	0.01681	296.222	0.01034	326.114		324.353	0.02613	324.268	-0.0382	326.228		326.235		323.549	-0.05529
310.603	0.08179	325.236	0.0145	325.521	0.0717	331.34	0.10599	296.77	-0.04891	296.315	0.03429	326.207		324.446	-0.0217	324.36	0.00929	326.321		326.328		323.641	-0.08513
321.505	0.00785	325.328	0.00769	325.623	-0.00495	331.432	0.05131	296.863	-0.01508	296.407	0.01187	326.299		324.538	-0.04892	324.453	-0.01967	326.413	-0.05548	326.42	-0.12498	323.734	-0.06034
321.69	0.01242	325.421	0.0128	325.715	0.09765	331.525	0.02994	296.955	0.03222	296.5	0.02897	326.392	0.02965	324.631	-0.01553	324.545	0.01725	326.506	0.02338	326.513	-0.1031	323.827	-0.03034
321.874	0.01663	325.513	-0.08876	325.808	0.1354	331.617	0.02963	297.048		296.592	-0.10374	326.484	0.04828	324.723	-0.01507	324.638	-0.02348	326.598	-0.04265	326.606	-0.04516	323.919	-0.02318
322.059		325.616	0.01549	325.901	0.04665	331.71	0.05715	297.14	0.02341	296.685	-0.09286	326.577	0.0118	324.816	0.01652	324.73	-0.01273	326.691	-0.00339	326.698	-0.13149	324.012
322.243	0.01999	325.708	0.02532	325.993		331.805	0.07141	297.233	0.03353	296.777	-0.03606	326.669	-0.01544	324.908	0.04648	324.823	-0.03397	326.784	0.000858047	326.791	-0.07192	324.104
322.421	0.02363	325.801	-0.03355	326.086		331.897	0.10016	297.325	-0.03073	296.87	0.05219	326.762	0.01112	325.001		324.915	0.01635	326.876	0.00177	326.883	-0.00818	324.197	-0.02537
322.563	0.02094	325.893	0.00655	326.178		331.99		297.418	-0.00819	296.962		326.855	0.03011	325.093		325.008		326.969		326.976		324.289	-0.00727
322.705	0.01678	325.986		326.271		332.083		297.51	-0.00914	297.055		326.947	0.02408	325.186	0.00862	325.101		327.061		327.068		324.382	0.0164
322.847	0.01504	326.079		326.363		332.175		297.603	-0.00229	297.147	0.0263	327.04		325.279	-0.01208	325.193	0.0372	327.154	0.03004	327.161	-0.01069	324.474	0.02693
322.988		326.171		326.456	0.10091	332.268		297.695	-0.04087	297.24	-0.03198	327.132	0.04801	325.371	-0.03702	325.286	0.00162	327.246	0.04622	327.253	-0.05357	324.567	-0.03395
323.13	0.01131	326.264		326.548	0.07385	332.36		297.788	-0.03592	297.332	-0.08949	327.225	0.1433	325.464	-0.02953	325.378	-0.00591	327.346	-0.01815	327.353	0.00365	324.659	0.04273
323.272	0.01377	326.356		326.641	0.06578	332.453		297.88	-0.01907	297.425	0.00785	327.324	0.16256	325.556	-0.05576	325.471	-0.09717	327.438	-0.07623	327.445	-0.14321	324.752	0.01895
323.413	0.01613	326.449	-0.0594	326.734	0.07412	332.564		297.973		297.517	-0.00659	327.417	0.14314	325.659	-0.01454	325.563	0.25671	327.531	-0.16666	327.538	-0.23554	324.844	-0.000557939
323.471	0.000671256	326.541	0.01313	326.826	0.08904	332.657	-0.0196	298.065		297.61	-0.0247	327.509	0.06465	325.751	-0.01836	325.666	0.0049	327.623	-0.01668	327.63	-0.12399	324.937	0.01561
323.563	0.08535	326.634	-0.08192	326.919	0.09975	332.749	-0.00706	298.158	-0.02058	297.702	-0.03076	327.602	0.00811	325.844	0.04929	325.758	0.03038	327.713	0.00672	327.72	-0.09177	325.029
323.656	0.04483	326.726	-0.02081	327.011		332.838	-0.0425	298.25	-0.02153	297.795	-0.01668	327.691	-0.05591	325.936	0.01069	325.851	0.00957	327.805	-0.02066	327.812	-0.16395	325.122
323.748	0.01186	326.819	0.03928	327.104		332.931	-0.04742	298.343		297.887	-0.02567	327.784	-0.00492	326.029		325.943	0.02586	327.898	-0.04806	327.905	-0.12199	325.215	0.01471
323.841	0.03082	326.912	-0.02596	327.196	0.03444	333.023		298.436		297.98		327.876	0.18226	326.121		326.036		327.99		327.998		325.307	0.02477
323.933	0.06932	327.004		327.289	0.04845	333.116		298.538	-0.01261	298.072		327.969		326.214		326.128		328.083		328.09		325.4	0.04438
324.026		327.097		327.381	0.10566	333.209	0.05405	298.631	0.01609	298.165	-0.05032	328.062		326.306		326.221		328.176	0.03756	328.183	-0.0269	325.492	-0.02629
324.118		327.189	0.03366	327.474	0.06644	333.301	0.08097	298.723	-0.01971	298.258	-0.0194	328.154	0.0931	326.399	-0.01977	326.314		328.268	0.02963	328.275	-0.0383	325.585	0.03371
324.211	0.03012	327.282	0.04164	327.566	0.09816	333.394	0.08368	298.816	-0.04342	298.35		328.247	0.04468	326.492	0.0179	326.406	0.00472	328.369		328.376		325.687	0.05635
324.303	0.02206	327.374	-0.02306	327.663	0.07072	333.494	0.1294	298.908	-0.07857	298.443		328.347	0.04783	326.584	-0.0216	326.499	-0.05548	328.461		328.468		325.78	-0.00749
324.396	0.04652	327.467	-0.09836	327.755	0.09092	333.586	0.03258	299.001		298.545	-0.02387	328.44		326.677	-0.03282	326.591	-0.06721	328.554		328.561		325.872	-0.0141
324.488	-0.14439	327.559	0.02832	327.848	0.11833	333.679	0.10944	299.093		298.638	-0.07724	328.532		326.769	-0.00707	326.684	-0.02464	328.646		328.653		325.965
324.581	-0.07264	327.656	0.01843	327.94	0.07111	333.771	0.0589	299.186	-0.02844	298.73	-0.0029	328.625		326.862	0.0059	326.776	0.00363	328.741		328.748		326.057
324.673	0.07108	327.748	-0.03152	328.033		333.864	0.04449	299.279	-0.01644	298.823	-0.03051	328.717		326.954	-0.00315	326.869	0.01894	328.833		328.84		326.15
324.766	0.14543	327.841	-0.00465	328.126	0.12849	333.957	0.02229	299.371	0.05218	298.915	0.01569	328.805		327.047		326.961		328.926		328.933		326.242
324.858	0.10443	327.933	-0.046	328.218	0.11959	334.049		299.464	-0.03873	299.008		328.897		327.139	-0.05292	327.054		329.018		329.025		326.335
324.951	0.03662	328.026		328.319	-0.0411	334.142	0.05309	299.556	-0.07421	299.101		328.99		327.232	0.00585	327.147	0.04105	329.111		329.118		326.428	0.01884
325.044		328.118		328.411		334.234	0.08916	299.649	-0.08098	299.193	-0.0113	329.082		327.331	0.0156	327.239	0.05724	329.203		329.211		326.52	-3.74437e-05
325.136	0.05156	328.211	0.03929	328.504		334.327	0.01974	299.741	-0.00497	299.286	0.03147	329.175		327.424	-0.0475	327.338	-0.00556	329.296		329.303		326.613	0.04128
325.229	-0.000559979	328.311	0.02907	328.596		334.423	0.06928	299.834	-0.03087	299.378	-0.02326	329.267		327.516	-0.08642	327.431	-0.04091	329.391	0.01591	329.398	-0.02897	326.705	0.06079
325.321	0.06047	328.404		328.689		334.515	0.07967	299.926	-0.01097	299.471	-0.10752	329.36		327.609	-0.05603	327.524	-0.1415	329.484	0.00604	329.491	-0.04033	326.798	0.02694
325.414	0.04769	328.497		328.776		334.607	0.0314	300.019		299.563	-0.01072	329.455	0.01942	327.698	-0.05609	327.616	-0.00921	329.576	-0.00208	329.583	-0.03266	326.89	0.0099
325.506	-0.12185	328.589		328.869		334.7	0.07919	300.111		299.656	-0.02161	329.548	0.01898	327.791	-0.03324	327.706	-0.01826	329.874	0.02318	329.881	-0.03547	326.983
325.609	0.01691	328.682		328.961		334.793	0.12736	300.204	-0.02329	299.748	-0.0563	329.64	0.11689	327.884	-0.00812	327.798	0.02803	329.967		329.974		327.075
325.701	-0.00149	328.769		329.054		334.885	0.10661	300.296	0.000876797	299.841	-0.00123	329.853	0.0545	327.976		327.891	-0.04219	330.059		330.066		327.168	0.07291
325.794	0.01761	328.862		329.146		334.978		300.389	0.03612	299.933	-0.04984	329.945	0.01953	328.069		327.983		330.152		330.159		327.26	0.08147
325.886	0.00113	328.954		329.239		335.071		300.481	-0.00241	300.026		330.038		328.161	-0.00946	328.076		330.244		330.251		327.36	0.0138
325.979		329.047		329.332		335.163		300.574	0.00732	300.118		330.13		328.254	-0.0198	328.168	-0.02692	330.341	0.00269	330.348	0.00809	327.452	0.00366
326.071		329.139		329.427	0.08289	335.256	0.10847	300.666	-0.06621	300.211	-0.01649	330.223		328.354	-0.01637	328.261	0.02149	330.631	0.02346	330.638	-0.07218	327.545	-0.01879
326.164		329.232		329.519	0.08059	335.348	0.11635	300.759	-0.03582	300.304	0.01735	330.32	0.05565	328.447		328.361	0.06928	330.723	0.07657	330.73	-0.07064	327.637	0.03118
326.257		329.324		329.612	0.07334	335.439	0.10561	300.852	0.01617	300.396	-0.02799	330.609	-0.00756	328.539		328.454		330.818	0.08507	330.825	-0.00811	327.727	0.0461
326.349		329.42	0.03062	329.824	0.10231	335.532	0.09604	300.944	-0.04594	300.489	-0.01557	330.702	-0.03677	328.632		328.546		330.911	0.08393	330.918	0.04477	327.82	0.01326
326.442	0.05192	329.512	0.05123	329.917	0.09495	335.625	0.02547	301.037		300.581	-0.02637	330.797	0.05054	328.724		328.639		331.003		331.01		327.912	0.04497
326.534	0.05414	329.605	0.00781	330.009		335.717	0.07288	301.129	0.00562	300.674	-0.0483	330.889	-0.02744	328.812		328.732		331.096		331.103		328.005
326.627	0.07281	329.817	0.00327	330.102		335.81	0.06516	301.222	0.01542	300.766	-0.04605	330.982		328.904		328.819		331.188	0.05573	331.196	0.00963	328.097
326.719	0.08146	329.91	0.05811	330.194		335.902	0.12808	301.314	0.00812	300.859	-0.0771	331.074		328.997		328.912		331.281	0.07615	331.288	0.03851	328.19	0.02345
326.812	0.11801	330.002		330.291	0.08981	335.995		301.419	0.02936	300.951	-0.01288	331.167	-0.00324	329.09		329.004		331.382	0.0941	331.39	-0.03489	328.282	0.04913
326.904	0.04105	330.095		330.501	0.10759	336.088		301.512	-0.00686	301.044		331.26	0.01402	329.182		329.097		331.475	-0.02845	331.482	-0.09902	328.383
326.997		330.187		330.581	0.13083	336.18	0.08492	301.604	-0.06331	301.136	-0.03378	331.361	0.01109	329.275		329.189		331.568	0.02902	331.575	-0.07878	328.475
327.089		330.28	0.08013	330.673	0.11179	336.273	0.08883	301.697	-0.03514	301.229	-0.01999	331.454	-0.01876	329.367	0.01548	329.282		331.66	-0.01366	331.667	-0.06668	328.568
327.182	0.09596	330.574	0.02322	330.768	0.11449	336.365	0.1227	301.789	-0.00287	301.322	-0.02591	331.546	0.06859	329.462	0.00614	329.374	-0.01221	331.753	0.03461	331.76	-0.06515	328.66
327.275	0.06103	330.666	0.02831	330.861	0.20954	336.464	0.08581	301.882	0.0144	301.427	-0.0194	331.639	0.03138	329.555	-0.03782	329.47	0.00683	331.848	0.0151	331.855	-0.08053	328.755
327.367	0.06243	330.761	0.03397	330.953	0.07598	336.556	0.09069	301.974		301.519	-0.00601	331.731	0.06709	329.86	0.00448	329.562	0.00217	331.94	0.02049	331.947	-0.07119	328.847
327.459	0.01606	330.854	0.07434	331.046		336.649	0.06637	302.067		301.612	0.02435	331.826	-0.01804	329.952	0.04991	329.867	0.05474	332.033		332.04		328.94
327.552	0.09826	330.946	0.02579	331.139	0.15403	336.741	0.07466	302.16	-0.00628	301.704	-0.02005	331.919	0.194	330.045		329.959		332.125		332.132		329.033
327.649	-0.0173	331.039		331.231	0.11084	336.834	0.06266	302.252	-0.0207	301.797	0.00487	332.011		330.137		330.052		332.218		332.225		329.125
327.741	0.07569	331.131	0.01775	331.333	0.14619	336.927	0.05968	302.345	0.01166	301.889	-0.01383	332.104		330.23		330.145		332.31		332.318		329.218
327.834	0.09924	331.224	0.04567	331.425	0.12099	337.019		302.437	0.03398	301.982		332.197		330.327	0.02648	330.237		332.403		332.41		329.31
327.926	0.11721	331.325	0.04228	331.518	0.12563	337.112		302.53	0.01129	302.074		332.289		330.616	-0.03882	330.334	0.04036	332.496		332.614	-0.09772	329.405	0.03098
328.019		331.418	0.07446	331.61	0.07806	337.204	0.03279	302.622	0.01629	302.167	-0.05833	332.382		330.709	0.0342	330.624	-0.03897	332.607	0.04152	332.706	-0.09874	329.498	-0.01009
328.111		331.511	0.037	331.703	0.10739	337.297	0.03825	302.715	-0.04573	302.259	-0.0027	332.474		330.804	0.03538	330.716	0.07996	332.699	-0.0193	332.803	-0.03359	329.591	-0.04275
328.204	0.06899	331.603	0.05389	331.798	0.07663	337.389	0.07552	302.807	0.01547	302.352	0.00722	332.585	0.12139	330.896	-0.00792	330.811	0.11872	332.795	0.08041	332.895	-0.04539	329.888	0.05384
328.304	0.09573	331.696	0.04684	331.89	0.10175	337.478	0.12062	302.9	-0.02222	302.444	-0.07634	332.678	0.09297	330.989		330.904	0.08968	332.888	0.04247	332.988		329.981
328.397		331.791	0.06503	331.983		337.571	0.11433	302.992		302.537	-0.01673	332.774	0.13396	331.082		330.996		332.981		333.08		330.073
328.489		331.883	0.04811	332.075		337.663	0.0811	303.085		302.629	-0.02338	332.867	0.0523	331.174	-0.01861	331.089		333.073		333.173	-0.01762	330.166
328.582		331.976		332.168		337.756	0.03399	303.177	0.02112	302.722	-0.00652	332.959		331.267	0.01566	331.181	-0.00632	333.166	-0.00315	333.265	0.01167	330.259
328.675		332.068		332.261		337.848	0.05108	303.27	0.01627	302.814	-0.02138	333.052		331.368	0.0244	331.274	0.02034	333.258	0.05157	333.358	0.00348	330.355	0.08216
328.762		332.161		332.353		337.941	0.05423	303.362	-0.01281	302.907	0.02415	333.144	0.05818	331.461	-0.02098	331.375	0.03218	333.351	0.05064	333.458	0.04685	330.645	0.08156
328.855		332.253		332.446		338.034		303.455	0.06232	302.999		333.237	-4.33381e-05	331.553	-0.06587	331.468	0.00538	333.451	0.05609	333.551	0.03559	330.738	0.06158
328.947		332.346		332.557		338.126	0.01597	303.547	0.00861	303.092		333.33	0.08555	331.646	0.00175	331.56	-0.01629	333.543	0.06645	333.643	0.01285	330.832	0.15188
329.04		332.439		332.649	0.05867	338.219	0.04593	303.64	0.02942	303.185	-0.01512	333.43	0.03007	331.738	-0.01851	331.653	-0.01262	333.636	0.05781	333.736	-0.04342	330.925	0.0996
329.132		332.55		332.742	0.12512	338.311	0.04157	303.732	-0.02679	303.277	-0.00874	333.522	0.08112	331.833	0.00192	331.746	0.03637	333.729	0.05177	333.828	-0.01012	331.018
329.225		332.642	0.04131	332.831	0.12725	338.404	-0.00547	303.825	0.00842	303.37	0.02555	333.615	0.06265	331.926	0.0137	331.841	0.09464	333.821	0.05678	333.921	0.00815	331.11
329.317		332.735	0.03542	332.924	0.13029	338.497	0.10244	303.917	-0.02069	303.462	-0.0123	333.707	0.0261	332.018		331.933	0.02993	333.914	0.05509	334.014		331.203	0.10447
329.413	0.0992	332.824	0.08137	333.016		338.597		304.01		303.555	0.01037	333.8	0.06165	332.111		332.026		334.006		334.106		331.295	0.04373
329.505	0.0894	332.917	0.00605	333.109		338.69		304.102		303.647	0.01639	333.892	0.05027	332.204		332.118		334.099		334.199	-0.00726	331.397	0.0955
329.598	0.0761	333.009		333.201	0.12998	338.782		304.195	0.0178	303.74	0.0226	333.985		332.296		332.211		334.192	0.13048	334.291	-0.000443888	331.489	0.05133
329.795	0.13448	333.102		333.294	0.04722	338.875		304.287	0.03166	303.832	-0.05167	334.078		332.389		332.303		334.284	0.12754	334.384	-0.05162	331.582	0.12451
329.81	0.17538	333.194	0.02353	333.387	0.07339	338.968		304.38	0.04239	303.925	-0.03194	334.17	-0.05567	332.481		332.396		334.377	0.02515	334.473	-0.05261	331.674	0.08241
329.902	0.07082	333.287	0.04035	333.487	0.15231	339.06		304.472		304.017		334.263	0.02041	332.593	0.00508	332.488		334.465	0.02437	334.565	-0.07487	331.767	0.04937
329.995		333.379	0.06078	333.579	0.13825	339.153		304.565		304.11		334.355	0.03277	332.685	-0.01652	332.6	0.0223	334.558	0.08699	334.657	-0.01158	331.862	0.03334
330.088		333.479	0.06093	333.672	0.16756	339.245		304.658		304.202	0.00708	334.444	0.04766	332.781	-0.01455	332.692	0.00292	334.65	-0.00968	334.75	0.00977	331.954	0.13054
330.18		333.572	0.06799	333.764	0.10377	339.338		304.75		304.295	-0.00913	334.537	-0.01827	332.874	-0.00967	332.788	-0.000347554	334.743	0.11717	334.842	0.05838	332.047
330.273		333.665	0.05309	333.857	-0.01934	339.431		304.842		304.387	0.00524	334.629	0.0039	332.966		332.881	0.04647	334.835	0.06895	334.935	0.0047	332.14
330.566	0.07739	333.757	0.05663	333.949	0.08385	339.523		304.935		304.48		334.721	0.01278	333.059		332.973		334.928	0.10032	335.028		332.232
330.659	0.13987	333.85	0.07101	334.042		339.616		305.028		304.572		334.814	0.04362	333.152	-0.04005	333.066		335.021		335.12		332.325
330.754	0.15676	333.942	0.06856	334.135	0.05371	339.708		305.12		304.665		334.907	0.05824	333.244	-0.01729	333.159	0.10544	335.113		335.213		332.417
330.846	0.07904	334.035		334.227	0.07888	339.801		305.213		304.757		334.999		333.337	0.04915	333.251	0.08975	335.206		335.306	0.00178	332.621	0.10484
330.939	0.16643	334.128	0.05443	334.32	0.13435	339.894		305.305		304.85		335.092		333.437	0.04616	333.344	0.12797	335.298	0.01474	335.404	-0.06827	332.714	0.04781
331.032		334.22	0.02288	334.416	0.12301	339.986		305.398		304.942		335.184		333.529	-0.01983	333.444	0.10831	335.397	0.10463	335.496	-0.00215	332.81	0.05991
331.124		334.313	0.04632	334.508	0.07801	340.079		305.49		305.035		335.277	0.02432	333.622	0.07913	333.536	0.07283	335.489	-0.0134	335.589	5.76118e-06	332.902	0.09933
331.217	0.08019	334.408	0.05155	334.6	0.14793	340.171	0.05881	305.596	0.10071	305.127		335.37	0.09577	333.714	-0.04164	333.629	0.08565	335.582	-0.02842	335.681	0.01459	332.995
331.309	0.14181	334.501	0.08428	334.693	0.18699	340.264	0.12671	305.688	0.08317	305.22		335.461	0.00868	333.807	0.08131	333.721	0.05249	335.674	0.05352	335.774	-0.00915	333.087
331.318	0.08113	334.593	0.05316	334.785	0.14525	340.357	0.12802	305.781	0.08347	305.312		335.553	-0.13126	333.9	0.0147	333.814	0.06558	335.767	0.01788	335.867	0.10219	333.18	0.07836
331.411	0.05553	334.686	0.08297	334.878	0.14303	340.458	0.13946	305.873	0.06374	305.405		335.646	-0.02567	333.992		333.907	0.0338	335.859	0.06119	335.959		333.273	0.06764
331.503	0.09014	334.778	0.1167	334.971		340.551	0.09868	305.966		305.497		335.739	-0.01641	334.085		333.999		335.952	0.0405	336.052		333.365	0.0662
331.596	0.04653	334.871	0.07845	335.063		340.643	0.02339	306.059		305.603	-0.03302	335.831	-0.02882	334.177	0.02817	334.092		336.045		336.144	0.10534	333.465	0.10911
331.689	0.1374	334.964		335.156		340.736	-0.03685	306.151	0.04662	305.695	-0.03286	335.924	-0.0157	334.27	0.01426	334.184	0.04543	336.137	0.06333	336.237	0.0074	333.558	0.09109
331.783	0.09308	335.056		335.249	0.09618	340.829	0.04132	306.244	0.08751	305.788	-0.03775	336.016		334.362	0.05541	334.277	0.05141	336.23	0.08932	336.33	0.06615	333.65	0.07936
331.876	0.13071	335.149		335.341	0.18978	340.921	0.08253	306.336	0.07139	305.881	-0.01072	336.109		334.451	-0.06254	334.37	0.03802	336.323	0.11594	336.422	-0.02098	333.743	0.08881
331.969		335.241	0.14689	335.432	0.15257	341.014		306.429	0.06809	305.973		336.201	0.03722	334.544	-0.03993	334.458	0.04608	336.415	-0.00836	336.513	-0.04522	333.835	0.03857
332.061		335.334	0.05779	335.525	0.16784	341.106		306.521	0.06892	306.066		336.294	0.01596	334.636	-0.02123	334.551	-0.19537	336.506	0.07149	336.606	-0.05901	333.928	0.05406
332.154		335.425	0.06506	335.617	0.14853	341.199	0.06798	306.614	0.09986	306.158	-0.01402	336.387	-0.03704	334.728	0.01252	334.643	0.00161	336.599	-0.01702	336.699	-0.07658	334.021
332.246		335.518	0.05091	335.71	0.0981	341.292	0.08837	306.706	0.05832	306.251	0.03516	336.485	-0.0132	334.821	0.02845	334.736	0.10134	336.692	0.01141	336.791	-0.03619	334.113
332.339		335.61	0.02117	335.803	0.08784	341.384	0.06193	306.799	0.07747	306.343	0.00883	336.577	-0.06973	334.914	0.00881	334.828	0.0674	336.784	0.0129	336.884	0.02018	334.206	0.07547
332.431		335.703	0.07996	335.895	0.09836	341.477	0.02331	306.891	0.04174	306.436	0.01253	336.67	-0.08745	335.006		334.921	0.11974	336.877	0.07793	336.976		334.298	0.06204
332.543		335.795	0.06098	335.988		341.569	0.04115	306.984		306.528	-0.04826	336.763	-0.03071	335.099		335.014		336.969		337.069		334.391	0.10387
332.635	0.08648	335.888	0.07523	336.08		341.662	0.07681	307.076		306.621	-0.04136	336.855	0.0332	335.192		335.106		337.062		337.162	0.03977	334.48	0.08022
332.728	0.1936	335.981		336.173	0.11748	341.754	0.0709	307.169	0.04128	306.713	-0.02788	336.948	0.03918	335.284	0.06759	335.199		337.155	0.09956	337.254	-0.01659	334.572	0.09301
332.817	0.14844	336.073		336.266	0.16972	341.847	-0.00765	307.261	0.10135	306.806	-0.03006	337.041		335.377	0.04038	335.291	0.117	337.247	0.04022	337.347	0.02506	334.664	0.11146
332.909	0.13424	336.166	0.09765	336.358	0.10396	341.94	0.04569	307.354	0.08226	306.898	0.00867	337.133	-0.07524	335.468	-0.01165	335.39	0.05556	337.34	-0.00656	337.439	-0.04202	334.757	0.10055
333.002		336.258	0.12164	336.456	0.14517	342.032		307.447	0.23486	306.991		337.226	-0.00162	335.561	-0.06651	335.482	0.00338	337.432	-0.04951	337.528	-0.06175	334.85	0.08557
333.095		336.351	0.13437	336.549	0.15777	342.125		307.539	0.22363	307.083		337.318	-0.02629	335.653	-0.0305	335.575	-0.00812	337.521	-0.21663	337.621	-0.02751	334.942	0.12615
333.187	0.12382	336.444	0.06885	336.642	0.17622	342.217	0.057	307.631	0.10512	307.176	-0.01957	337.411	-0.04657	335.746	-0.00348	335.667	-0.04225	337.614	-0.03803	337.713	-0.05121	335.035
333.28	0.11882	336.535	0.05249	336.734	0.12849	342.31	0.04248	307.724	0.1246	307.269	0.00277	337.5	-0.03428	335.838	-0.04011	335.76	0.05762	337.706	0.07585	337.806	-0.04052	335.128
333.372	0.17378	336.627	0.08858	336.827	0.09716	342.402	0.01278	307.816	0.05812	307.361	-0.01482	337.592	-0.04537	335.931	0.04794	335.852	0.0522	337.799	0.08885	337.898	-0.05312	335.22
333.472	0.17394	336.72	-0.00933	336.919	0.14291	342.495	0.02301	307.909	0.06983	307.454	0.0104	337.685	-0.11883	336.023		335.945	0.09923	337.891	0.06997	337.991		335.313	0.16657
333.565	0.11049	336.813	0.02561	337.012		342.593	-0.00968	308.002		307.546	-0.03001	337.777	-0.04261	336.116		336.038		337.984		338.084		335.411	0.08553
333.657	0.09622	336.905	0.04721	337.105		342.685	-0.00284	308.094		307.639	-0.03276	337.87	-0.02477	336.209	0.02153	336.13	0.03536	338.076		338.176	-0.01002	335.504	0.10305
333.75	0.06461	336.998		337.197	0.11368	342.778	-0.00129	308.187	0.08215	307.731	-0.07042	337.962		336.301	0.03671	336.223	0.04951	338.169	0.01474	338.269	-0.05647	335.596	0.04052
333.843	0.00688	337.091		337.29	0.10714	342.87	0.04678	308.279	0.04012	307.824	-0.02846	338.055		336.394	0.04268	336.315	0.08206	338.262	0.04255	338.361	0.04737	335.689	0.01811
333.935	0.04799	337.183	-0.00257	337.382	0.09623	342.963		308.372	0.1243	307.916	-0.06151	338.148	-0.01077	336.492	-0.00868	336.408	0.03183	338.354	0.06406	338.454	-0.00674	335.781	0.06452
334.028		337.276	0.1045	337.471	0.18031	343.056		308.464	0.07228	308.009		338.24	-0.03033	336.585	-0.0554	336.499	0.05776	338.447	0.03016	338.546	-0.02104	335.874	0.06998
334.12		337.368	0.06657	337.564	0.10146	343.148	0.05761	308.557	0.07629	308.101		338.333	-0.06015	336.677	-0.05248	336.592	0.06042	338.539	-0.02304	338.647		335.966
334.213	0.05424	337.464	0.04737	337.656	0.18063	343.241	-0.02001	310.447	0.02256	308.194	0.01401	338.425	-0.00247	336.77	-0.00551	336.684	-0.01124	338.64		338.74		336.059
334.306	0.08117	337.557	0.10724	337.749	0.11881	343.333	0.0327	310.539	0.00245	308.286	0.00408	338.518	-0.09261	336.862	0.04575	336.777	-0.00246	338.733		338.832		336.152	0.07232
334.401	0.10993	337.649	0.08563	337.841	0.11225	343.426	-0.03232	310.632	0.04787	308.379	-0.01658	338.619		336.955	-0.00608	336.87	0.07901	338.825		338.925		336.244	0.06946
334.494	0.12634	337.742	0.04434	337.934	0.14083	343.519	0.0284	323.499	0.02127	308.471	-0.0505	338.711		337.048		336.962		338.918		339.018		336.337	0.0767
334.586	0.12633	337.834	-0.01798	338.027		343.611	0.000975525	323.592	0.0136	308.564	-0.0102	338.804		337.14	0.000962612	337.055		339.01		339.11		336.429	0.02191
334.679	0.19684	337.927	0.05076	338.119		343.704	-0.06813	323.684	-0.08111	310.454	5.13449e-05	338.896		337.233	0.01044	337.147	0.11731	339.103		339.203		336.521	0.0862
334.771	0.1443	338.019		338.212	0.11534	343.796	0.00764	323.777	-0.02798	310.546	-0.01202	338.989		337.325	0.01449	337.24	0.12189	339.196		339.295		336.613	0.09989
334.864	0.16259	338.112		338.304	0.07184	343.889	0.07566	323.869	0.02126	310.639	0.00412	339.082		337.418	0.00889	337.332	0.10788	339.288		339.388		336.706	0.05905
334.956	0.12785	338.205	-0.01307	338.397	0.10311	343.982		323.962		321.565	0.00208	339.174		337.507	-0.04548	337.425	0.09037	339.381		339.48		336.798	0.03964
335.049		338.297	-0.00661	338.489	0.11847	344.074		324.054		321.749	-0.00215	339.267		337.599	-0.06614	337.514	0.09839	339.473		339.573		336.891	0.11357
335.142		338.39	0.00923	338.59		344.167	0.16429	324.147	0.01148	321.933	0.00297	339.359		337.692	-0.1053	337.606	0.00595	339.566		339.666		336.984
335.234		338.482	-0.01201	338.683		344.259	0.10853	324.239	0.01248	322.118		339.452		337.784	-0.03432	337.699	0.10117	339.658		339.758		337.076
335.327	0.09975	338.583		338.775		344.352	0.07954	324.332	0.0574	322.302	0.00216	339.545		337.877	0.02148	337.791	0.07812	339.751		339.851		337.169	0.10812
335.418	0.10459	338.676		338.868		344.445	0.05325	324.424	0.04099	322.466	0.00394	339.637		337.97		337.884	0.06361	339.844		339.943		337.261	0.11582
335.511	0.17705	338.768		338.96		344.537	0.07777	324.517	-0.06049	322.608	-0.000702871	339.73		338.062		337.977		339.936		340.036		337.354	0.1401
335.603	0.17882	338.861		339.053		344.63	0.0861	324.609	-0.00286	322.75	-0.00184	339.822		338.155	-0.01537	338.069		340.029		340.129	0.22284	337.446	0.04695
335.696	0.19023	338.953		339.146		344.722	0.0377	324.702	0.00673	322.891	0.00055103	339.915		338.247	0.07062	338.162	-0.00173	340.122		340.221	0.23146	337.535	0.107
335.788	0.11577	339.046		339.238		344.815	0.10908	324.794	0.02134	323.033		340.008		338.34	-0.00397	338.254	0.03891	340.214	0.09791	340.314	0.10437	337.628	0.10355
335.881	0.10841	339.139		339.331		344.908	0.07529	324.887	0.06673	323.175	0.00119	340.1		338.432	-0.01261	338.347	0.03094	340.307	0.09891	340.407	-0.44415	337.72	0.02413
335.974		339.231		339.423		345		324.979		323.317	0.00188	340.193	0.000211658	338.525	-0.04663	338.44	0.00165	340.399	0.11251	340.508	-0.54046	337.813	0.07427
336.066		339.324		339.516		345.093		325.072		323.458	0.00282	340.285	-0.02257	338.626		338.532	0.00973	340.501	0.02703	340.601	-0.60751	337.906	0.06679
336.159	0.09219	339.416		339.609		345.185	0.07805	325.165	0.04072	323.506	-0.13982	340.378	-0.03432	338.718		338.633		340.594	0.01281	340.693	-0.65803	337.998
336.251	0.1156	339.509		339.701		345.278	0.12154	325.257	0.06899	323.599	-0.12301	340.48	0.00507	338.811		338.726		340.686	0.06663	340.786	0.00392	338.091
336.344	0.14364	339.601		339.794		345.371	0.08032	325.35	-0.01752	323.691	-0.08823	340.572	-0.05925	338.904		338.818		340.779	0.05879	340.879	0.05995	338.183	0.04617
336.436	0.22257	339.694		339.886		345.469	0.10585	325.442	0.04354	323.784	-0.03406	340.665	-0.06128	338.996		338.911		340.871	0.08109	340.971		338.276	0.0534
336.528	0.14169	339.787		339.979		345.562	0.12682	325.535	-0.02837	323.876	-0.01577	340.757	-0.03933	339.089		339.003		340.964		341.064		338.368	0.04866
336.62	0.17481	339.879		340.072		345.655	0.13662	325.637	0.12272	323.969		340.85	-0.02366	339.181		339.096		341.057		341.156	0.17838	338.461	0.07049
336.713	0.15363	339.972		340.164	0.11997	345.747	0.05519	325.73	0.02288	324.061		340.943	-0.000331098	339.274		339.188		341.149	0.11869	341.249	0.16352	338.554	0.06472
336.805	0.119	340.065		340.257	0.10724	345.84	0.14638	325.822	0.05744	324.154	-0.01055	341.035		339.366		339.281		341.242	0.09988	341.341	0.29766	338.654
336.898	0.07408	340.157	0.0829	340.35	0.16219	345.932	0.0775	325.915	0.03746	324.246	0.00311	341.128	-0.02418	339.459		339.374		341.334	0.04452	341.434	-0.59313	338.747
336.991		340.25	0.0587	340.451	0.15428	346.025		326.007		324.339	0.02993	341.22	0.00431	339.552		339.466		341.427	0.0584	341.527	-0.38834	338.839
337.083		340.342	0.04448	340.544	0.16321	346.117		326.1		324.431	0.0315	341.313	-0.01425	339.644		339.559		341.519	0.02552	341.619	-0.57504	338.932
337.176	0.05132	340.444	0.04147	340.636	0.12774	346.21	0.15033	326.193		324.524	-0.00455	341.405	0.01878	339.737		339.651		341.612	0.01632	341.712	-0.42621	339.025
337.268	0.1709	340.537	0.01176	340.729	0.183	346.265	0.07903	326.285		324.616	0.00573	341.498	0.00101	339.829		339.744		341.705	-0.04652	341.804	0.10734	339.117
337.361	0.13206	340.629	0.01577	340.822	0.10536	346.287	7.81254	326.378	0.05727	324.709	0.06655	341.591	-0.0735	339.922		339.837		341.797	-0.02982	341.897	-0.30284	339.21
337.457	0.11379	340.722	-0.01562	340.914	0.1267	346.308	14.839	326.47	0.06729	324.802	-0.01005	341.683	-0.08804	340.015		339.929		341.89	-0.00503	341.989		339.302
337.549	-0.42213	340.814	0.03213	341.007		346.33	16.1557	326.563	0.000735083	324.894	-0.02204	341.776	-0.02604	340.107		340.022		341.982		342.082		339.395
337.642	0.17134	340.907	0.04989	341.099		346.358	16.4363	326.655	-0.06106	324.987		341.868	-0.000217096	340.2	0.0093	340.114		342.075		342.175	0.45835	339.488
337.735	0.09253	341		341.192	0.11793	346.379	15.1373	326.748	0.05622	325.079		341.961		340.293	0.02006	340.207	0.12889	342.167	0.04598	342.267	0.28173	339.58
337.827	0.13751	341.092		341.284	0.062	346.401	13.4157	326.84	0.09259	325.172	0.0435	342.053		340.385	0.00967	340.3	0.12794	342.26	0.02962	342.36	0.47745	339.673
337.92	0.08681	341.185	0.09919	341.377	0.12136	346.422	10.9695	326.933	0.06133	325.264	-0.02348	342.146	0.03146	340.487	-0.03701	340.392	0.08614	342.353	0.05537	342.452	0.00948	339.765
338.012		341.277	0.01698	341.47	0.1738	346.451	8.66455	327.025		325.357	-0.01555	342.239	0.05142	340.579	-0.06251	340.494	0.05105	342.445	0.01854	342.545	-0.15917	339.858
338.105		341.37	0.05117	341.562	0.18312	346.461	7.17379	327.118		325.449	0.01242	342.331	-0.01553	340.672	-0.00595	340.586	0.0456	342.538	-0.00127	342.643	0.19842	339.951
338.197	0.07914	341.462	0.13223	341.655	0.17414	346.554	0.67353	327.211	0.03644	325.542	-0.00626	342.424	-0.01916	340.765	-0.00665	340.679	0.09213	342.635	-0.01721	342.735	0.18081	340.043
338.29	0.05672	341.555	0.04146	341.747	0.14735	346.647	-0.33761	327.303	0.01329	325.644	0.05565	342.516	-0.0491	340.857	0.04226	340.772	0.0656	342.728	-0.04431	342.828	0.09805	340.136	0.0945
338.383	0.02671	341.648	0.03134	341.84	0.12482	346.739	-0.67989	327.395	0.05455	325.737	0.00643	342.614	0.01464	340.95	-0.00734	340.864	0.07786	342.821	0.02586	342.92	0.2195	340.228	0.13554
338.475	0.11032	341.74	0.03505	341.932	0.12493	346.832	-0.26169	327.488	0.07347	325.829	-0.01186	342.707	0.01959	341.042		340.957	0.02274	342.913	-0.00589	343.013		340.321	0.10747
338.576		341.833	0.06738	342.025		346.925	-0.18923	327.581	0.02054	325.922	0.04528	342.799	-0.02057	341.135	0.07131	341.049		343.006		343.105		340.414	0.15949
338.669		341.925	0.02205	342.118		347.017		327.677	0.04096	326.014		342.892	-0.02088	341.227	0.01808	341.142	0.05008	343.098		343.198	0.14125	340.515	0.10532
338.761		342.018		342.21	0.08335	347.11		327.77	0.0686	326.107		342.984		341.32	0.01444	341.235	0.13324	343.191	0.08859	343.291	0.10852	340.608	0.04535
338.854		342.11		342.303	0.11153	347.202	-0.12865	327.862	0.06349	326.2		343.077		341.413	0.05695	341.327	0.09209	343.284	-0.02904	343.383	0.06001	340.7	0.07433
338.946		342.203	0.06618	342.395	0.11319	347.295	-0.14163	327.955	0.0902	326.292		343.169	-0.08367	341.505	-0.01721	341.42	0.06155	343.376	0.02774	343.476	0.11843	340.793	0.08255
339.039		342.296	0.04484	342.488	0.14311	347.415	-0.0798	328.047		326.385	0.03439	343.262	0.0072	341.598	-0.01894	341.512	0.09603	343.469	-0.04537	343.568	0.1279	340.886	0.11268
339.131		342.388	0.03546	342.585	0.06366	347.508	-1.28904	328.14	0.08734	326.477	0.05005	343.355	-0.03096	341.69	-0.05983	341.605	0.02942	343.561	0.05156	343.661	-0.01117	340.978
339.224		342.481	0.01183	342.678	0.09688	347.6	-1.03276	328.232	0.06706	326.57	0.05837	343.447	-0.02827	341.783	-0.06246	341.697	0.132	343.654	0.05448	343.754	0.03507	341.071
339.317		342.578	0.03659	342.771	0.05213	347.693	-0.39742	328.333	0.09481	326.662	0.02496	343.54	0.02462	341.875	-0.06696	341.79	-0.01477	343.747	0.0056	343.846	0.09488	341.163	0.09819
339.409		342.671	0.05289	342.863	0.0928	347.785	-0.13953	328.425		326.755	0.01505	343.632	-0.03252	341.968		341.883	0.04091	343.839	0.05481	343.939	0.12568	341.256	0.0741
339.502		342.764	0.07043	342.956	0.07158	347.878	-0.18738	328.518		326.847	0.01088	343.725	0.02474	342.061		341.975		343.932	0.06561	344.031		341.349	0.12663
339.594		342.856	0.0251	343.048		347.971		328.611		326.94	0.0161	343.818	0.01941	342.153	0.00823	342.068		344.024		344.124		341.441	0.15291
339.687		342.949	0.08644	343.141	0.05764	348.063		328.703		327.033		343.91	-0.01936	342.246	0.02258	342.16	0.08272	344.117		344.217	0.10187	341.534	0.07838
339.78		343.041		343.234	0.04972	348.156	-0.06052	328.791		327.125		344.003		342.338	0.01615	342.253	0.09565	344.21	0.05135	344.309	0.08122	341.626	0.05581
339.872		343.134	0.005	343.326	0.06209	348.248	-0.08231	328.883		327.218	0.01487	344.095		342.431	-0.00558	342.345	0.10182	344.302	-0.01149	344.402	0.04732	341.719	0.09346
339.965		343.226	0.04467	343.419	0.1265	348.341	-0.15144	328.976		327.317	0.06962	344.188	-0.00773	342.523	-0.00103	342.438	0.05459	344.395	0.00913	344.494	0.01805	341.811	0.07767
340.057		343.319	0.06426	343.511	0.12294	348.434	-0.07214	329.068		327.41	-0.000916815	344.281	0.05952	342.621	-0.06873	342.531	0.08845	344.487	-0.01415	344.587	-0.02615	341.904	0.05208
340.15	0.09286	343.412	0.0138	343.604	0.1478	348.526	0.06588	329.161		327.502	0.01964	344.373	-0.01138	342.714	-0.01542	342.628	0.02926	344.58	0.00448	344.68	0.04268	341.997
340.243	0.09986	343.504	0.01817	343.697	0.13489	348.619	-1.80596	329.253		327.595	0.06764	344.466	0.02405	342.806	0.00799	342.721	0.05708	344.672	0.00562	344.772	0.08894	342.089
340.335	0.07458	343.597	-0.01142	343.789	0.1112	348.711	-0.60647	329.346		327.684	-0.0338	344.558	-0.03117	342.899	0.00531	342.813	0.12208	344.765	0.05264	344.865	0.08636	342.182	1.05909
340.437	0.13881	343.689	0.01589	343.882	0.16781	348.804	-0.15265	329.441	0.05604	327.777	-0.00637	344.651	0.01266	342.991		342.906	0.05429	344.858	0.00933	344.957	0.14884	342.274	0.21756
340.529	0.18426	343.782	0.04743	343.974		348.897	-0.1092	329.534	0.01807	327.869	0.05624	344.744	0.02179	343.084		342.999		344.95	0.00341	345.05		342.367	0.18013
340.622	0.19033	343.875	0.10921	344.067		348.989		329.626	0.05112	327.962		344.836	0.02111	343.177	-0.01656	343.091		345.043		345.143	0.09177	342.459	0.15394
340.715	0.09065	343.967		344.16	0.12784	349.082		329.838	0.0898	328.054		344.929	0.07873	343.269	-0.00225	343.184	0.09625	345.135	0.02722	345.235	0.09711	342.552	0.10599
340.807	0.08985	344.06		344.252	0.1081	349.174	-0.11553	329.931	0.08315	328.147	0.06186	345.021		343.362	-0.02322	343.276	0.07808	345.228	0.06205	345.328	0.10188	342.65	0.0564
340.9	0.06152	344.152	0.09991	344.345	0.18462	349.267	-0.1196	330.024		328.239	0.0653	345.114		343.454	-0.02328	343.369	0.04516	345.321	0.05713	345.42	0.10158	342.742	0.09655
340.992		344.245	0.07265	344.437	0.18211	349.36	-0.10439	330.116		328.34	0.04973	345.207	-0.000512656	343.547	0.00548	343.462	0.0365	345.413	0.04928	345.519	0.0242	342.835	0.0577
341.085		344.338	0.08702	344.53	0.15952	349.452	-0.06998	330.209		328.433		345.299	0.00282	343.64	-0.03822	343.554	0.13178	345.512	0.0082	345.612	0.00153	342.927	0.05653
341.178	0.13787	344.43	0.09572	344.623	0.22653	349.545	-0.06171	330.306	0.09327	328.525		345.392	-0.02826	343.732	0.02322	343.647	0.09168	345.605	-0.03746	345.705	0.07765	343.02
341.27	0.07757	344.523	0.09476	344.715	0.09545	349.642	-0.08375	330.515	0.02029	328.618		345.491	-0.09486	343.825	-0.00182	343.739	0.06945	345.697	0.03823	345.797	0.09023	343.113
341.363	0.08703	344.615	0.06343	344.808	0.12677	349.735	-0.10107	330.595	0.04785	328.71		345.583	-0.21245	343.917	0.0335	343.832	0.11881	345.79	-0.0192	345.89	0.08992	343.205	0.09626
341.455	0.17615	344.708	0.078	344.9	0.16176	349.827	-0.04535	330.688	0.13139	328.798		345.676	-0.00849	344.01		343.925	0.09045	345.883	0.06212	345.982		343.298	0.09062
341.548	0.1758	344.801	0.03432	344.993		349.92	-0.05468	330.782	0.09355	328.89		345.769	0.00799	344.103		344.017		345.975		346.075		343.39	0.106
341.64	0.107	344.893	0.05694	345.086		350.013		330.875	0.06774	328.983		345.861	-0.03142	344.195	0.04237	344.11		346.068		346.167	0.08911	343.483	0.03465
341.733	0.10118	344.986		345.178	0.10836	350.105		330.968		329.075		345.954	0.06596	344.288	0.03085	344.202	0.17612	346.16	0.03826	346.533	4.19009	343.576	0.06059
341.826	0.05696	345.078		345.271	0.08825	350.198		331.06		329.168		346.046		344.38	0.01942	344.295	0.09604	346.526	1.04276	346.625	0.33062	343.668	0.00149
341.918	0.09809	345.171	0.08414	345.363	0.10583	350.291		331.153	0.06347	329.26		346.139	0.027	344.473	0.00585	344.388	0.09137	346.618	0.1536	346.718	-0.56951	343.761	0.05873
342.011		345.264	0.14008	345.462	0.21627	350.383	-0.04899	331.245	0.11339	329.353		346.231	0.03829	344.566	-0.02962	344.48	0.08408	346.711	-0.27644	346.811	-0.22185	343.853	0.1072
342.103		345.356	0.05559	345.555	0.16444	350.476	-0.043	331.347	0.07206	329.448	0.03759	346.483	0.56409	344.658	-0.04993	344.573	0.03191	346.804	-0.23717	346.903	-0.22309	343.946	0.05417
342.196	0.067	345.455	0.09412	345.647	0.2265	350.568	-0.04319	331.439	0.08523	329.541	0.08344	346.576	2.69495	344.751	-0.00641	344.665	0.08814	346.896	-0.17499	346.996		344.039
342.288	0.08236	345.548	0.08398	345.74	0.16423	350.661	-0.12607	331.532	0.03923	329.633	0.15304	346.668	0.59531	344.843	0.06027	344.758	0.11785	346.989		347.089		344.131	0.10132
342.381	0.08435	345.64	0.08551	345.833	0.14631	350.753	-0.04678	331.625	0.13047	329.846	0.07802	346.761	-0.11398	344.936	0.04488	344.851	0.16786	347.081		347.181	-0.12997	344.224	0.09855
342.474	0.13975	345.733	0.07346	345.925	0.15759	350.846	0.00386	331.717	0.08589	329.938	0.045	346.853	-0.0048	345.029		344.943	0.12077	347.174	-0.14052	347.274	-0.14028	344.316	0.09014
342.571	0.17082	345.825	0.11872	346.018		350.939	0.05204	331.812	0.09838	330.031		346.946	-0.08052	345.121		345.036		347.267	-0.17642	347.366	-0.16113	344.409	0.05437
342.664	0.08898	345.918	0.08727	346.11		351.031		331.905	0.06154	330.123		347.039		345.214	-0.00153	345.128	0.114	347.359	-0.21568	347.465	-0.19231	344.502	0.03536
342.756	0.061	346.011		346.203	0.16815	351.124		331.997		330.216		347.131		345.306	0.0547	345.221	0.14139	347.458	-0.20156	347.558	-0.80552	344.594	0.05188
342.849	0.09426	346.103		346.497	10.5429	351.216	0.01148	332.09		330.313	0.04969	347.224	-0.03156	345.399	-0.00633	345.314	0.15354	347.55	-0.77271	347.65	-0.18754	344.687	0.12358
342.942	0.01955	346.196	0.06462	346.59	3.13403	351.309	0.02006	332.182		330.602	0.07449	347.316	-0.03288	345.498	-0.00233	345.406	0.11291	347.643	-0.28948	347.743	-0.20458	344.779	0.02293
343.034		346.504	8.8615	346.682	5.30301	351.402	-0.08492	332.275		330.695	0.10628	347.436	-0.06864	345.591	-0.05849	345.505	0.09637	347.736	-0.1714	347.835	-0.20988	344.872	0.11092
343.127	0.10535	346.597	1.81166	346.775	0.15503	351.494	-0.0453	332.367		330.79	0.03432	347.529	-1.07486	345.683	-0.01526	345.598	0.09258	347.828	-0.22355	347.928	-0.17297	344.965
343.219	0.09367	346.689	0.71635	346.868	0.00225	351.587	-0.06646	332.46		330.882	0.07322	347.622	-0.40585	345.776	-0.02497	345.69	0.04038	347.921	-0.12267	348.021		345.057
343.312	0.13764	346.782	-0.42305	346.96		351.679	-0.09124	332.571	0.02045	330.975		347.714	-0.11664	345.868	0.04146	345.783	-0.02436	348.013		348.113		345.15	0.13116
343.405	0.12255	346.875	-0.21226	347.053		351.772	0.02847	332.664	0.12688	331.067		347.807	-0.06285	345.961		345.875	0.15288	348.106		348.206	-0.13638	345.242	0.11001
343.497	0.10469	346.967		347.146		351.865	0.02526	332.76	0.05003	331.16	0.05598	347.899	-0.05295	346.053		345.968		348.199	-0.09143	348.298	-0.08549	345.335	0.11237
343.59	0.07407	347.06		347.238	-0.03029	351.957	-0.02811	332.852	0.10071	331.252	0.06099	347.992		346.146	0.03655	346.06		348.291	-0.14572	348.391	-0.08779	345.428	0.0687
343.682	0.08495	347.153		347.331	0.03229	352.05		332.945	0.08986	331.354	0.08053	348.085		346.238	0.04599	346.153	0.12522	348.384	-0.16984	348.484	-0.10056	345.526	0.11083
343.775	0.08877	347.245	-0.16963	347.408	-0.01359	352.143	0.08156	333.038		331.447	0.06066	348.177	-0.01859	346.49	0.54937	346.272	0.13448	348.476	-0.11525	348.576	-0.12775	345.619	0.10529
343.868	0.08396	347.338	-0.16911	347.501	-0.67558	352.235	0.0168	333.13	0.08774	331.539	0.13442	348.27	-0.02387	346.583	0.8658	346.294	5.7477	348.569	-0.16373	348.669	-1.12513	345.712	0.04738
343.96		347.401	-0.15097	347.593	-0.88796	352.328	0.01648	333.223	0.17668	331.632	0.10864	348.362	-0.05859	346.675	0.32732	346.315	-0.38782	348.662	-1.25493	348.761	-0.14899	345.804	0.11262
344.053		347.493	-0.69271	347.686	-0.05197	352.42	-0.04466	333.315	0.08726	331.724	0.12258	348.455	-0.07718	346.768	-0.15049	346.337	10.5037	348.754	-0.22619	348.854	-0.14901	345.897	0.14291
344.145	0.11153	347.586	-1.47412	347.778	-0.06996	352.513	-0.1356	333.408	0.12791	331.819	0.06116	348.548	-0.11262	346.861	-0.03329	346.365	11.9706	348.847	-0.21187	348.947	-0.18693	345.989
344.238	0.06128	347.678	-0.27365	347.871	-0.03674	352.605	-0.08723	333.501	0.08755	331.912	0.0319	348.64	-0.75418	346.953	-0.03886	346.386	11.2795	348.939	-0.20183	349.039		346.082
344.33	0.14477	347.771	-0.21611	347.963		352.698	-0.10046	333.593	0.08549	332.004		348.733	-0.21207	347.046		346.408	10.5542	349.032		349.132	-0.14075	346.174	0.07779
344.423	0.20266	347.864	-0.12638	348.056		352.791	0.02705	333.686	0.04402	332.097		348.825	-0.04212	347.138		346.429	8.53571	349.124		349.224	-0.09588	346.54	1.48266
344.516	0.16876	347.956	-0.1494	348.149	-0.06094	352.883	0.01297	333.779	0.10086	332.189		348.918	-0.01396	347.231	-0.06155	346.476	3.40604	349.217	-0.07003	349.317	-0.04295	346.633	0.00305
344.608	0.19737	348.049		348.241	-0.09847	352.976		333.871	0.08814	332.282		349.011		347.324	-0.00551	346.568	0.10536	349.31	-0.08539	349.409	-0.14881	346.725	-0.48494
344.701	0.16041	348.142	-0.09529	348.334	-0.06458	353.068		333.964		332.375		349.103		347.444	-0.04682	346.661	-0.35206	349.402	-0.15248	349.502	-0.11165	346.818	-0.30099
344.793	0.16269	348.234	-0.15601	348.427	-0.05207	353.161	0.01112	334.056		332.467		349.196	0.05579	347.536	-0.61463	346.754	-0.65317	349.495	-0.11525	349.595	-0.09818	346.91	-0.24128
344.886	0.0931	348.327	-0.13007	348.519	-0.02331	353.254	0.05606	334.149	0.12326	332.578	-0.01821	349.288	-0.04541	347.629	-0.24312	346.846	-0.16503	349.587	-0.13125	349.692	-0.08451	347.003
344.979		348.419	-0.14306	348.612	-1.02299	353.346	-0.00701	334.242	0.06532	332.671	0.00517	349.381	-0.09415	347.721	-0.12215	346.939	-0.12405	349.685	-0.09897	349.785	-0.11497	347.096
345.071		348.512	-0.0917	348.704	-0.62735	353.439	-0.69534	334.334	0.05747	332.767	0.05551	349.473	-0.07036	347.814	-0.06823	347.032		349.778	-0.12251	349.877	-0.09206	347.188	-0.13334
345.164	0.08112	348.605	-1.01366	348.797	-0.11557	353.531	-0.22697	334.43	0.09613	332.86	0.05122	349.566	-0.01646	347.907	-0.03288	347.124		349.87	-0.10213	349.97		347.281	-0.15977
345.257	0.09475	348.697	-1.14929	348.889	-0.11608	353.624	-0.3701	334.522	0.0351	332.952	-0.00448	349.664	-0.01864	347.999		347.217	-0.11578	349.963		350.063		347.374	-0.20433
345.349	0.08361	348.79	-0.14738	348.982		353.716	-0.26617	334.615	0.03829	333.045		349.756	-0.04105	348.092		347.309	-0.10745	350.056		350.155		347.472	-0.20573
345.448	0.18068	348.882	-0.19103	349.075		353.809	-0.1926	334.707	0.03461	333.137	0.02331	349.849	0.0116	348.184	-0.02041	347.451	-0.22207	350.148		350.248		347.565	-0.30393
345.541	0.11454	348.975		349.167	-0.08394	353.902	-0.20687	334.8	0.11714	333.23	0.07728	349.941	-0.00159	348.277	-0.00404	347.543	-1.05511	350.241		350.341	-0.02402	347.657	-0.11919
345.633	0.13069	349.067		349.26	-0.0825	353.994		334.892	0.17218	333.322	0.05299	350.034		348.37	-0.07069	347.636	-0.33385	350.333	-0.07239	350.433	-0.11307	347.75	-0.16755
345.726	0.08752	349.16	-0.13421	349.352	-0.00856	354.087		334.985		333.415	0.04009	350.127		348.462	-0.06487	347.728	-0.15515	350.426	-0.15844	350.526	-0.14597	347.842	-0.1247
345.818	0.10924	349.253	-0.11168	349.445	-0.01394	354.18	-0.12681	335.078		333.508	0.05931	350.219		348.555	-0.07259	347.821	-0.1269	350.519	-0.15611	350.618	-0.09233	347.935	-0.09629
345.911	0.13883	349.345	-0.18329	349.538	-0.03954	354.272	-0.11891	335.17		333.601	0.08319	350.312		348.647	-0.66256	347.914	-0.10693	350.611	-0.16135	350.711	-0.09532	348.028
346.003		349.438	-0.0715	349.635	-0.04546	354.365	-0.15739	335.263	0.11825	333.693	0.08118	350.405	-0.03219	348.74	-0.16298	348.006		350.704	-0.1355	350.803	-0.02488	348.12
346.096		349.53	-0.09968	349.728	-0.04664	354.458	-0.15754	335.355	0.15793	333.786	0.04378	350.497	-0.09061	348.832	-0.02692	348.099		350.796	-0.12503	350.896	-0.03037	348.213	-0.04032
346.189	0.12955	349.628	-0.09966	349.82	-0.0593	354.55	-0.1284	335.447	0.1065	333.878	0.02169	350.59	-0.00525	348.925	-0.03274	348.192	-0.08175	350.889	-0.05856	350.989		348.306	-0.07704
346.251	0.13261	349.721	-0.13233	349.913	-0.02529	354.643	-0.22156	335.539	0.15581	333.971		350.682	-0.04614	349.018		348.284	-0.03517	350.981		351.081		348.398	-0.12411
346.28	4.13648	349.813	-0.10714	350.006		354.735	-0.09002	335.632	0.0989	334.063		350.775	0.02633	349.11		348.377	-0.13976	351.074		351.174	0.03565	348.491	-0.06846
346.301	8.09996	349.906	-0.12253	350.098		354.828	-0.06598	335.724	0.19637	334.156	0.06014	350.867	0.04117	349.203	-0.0164	348.469	-0.14084	351.167	-0.06138	351.266	0.03271	348.583	-0.02463
346.322	8.31503	349.998		350.191		354.921	-0.05884	335.817	0.10813	334.249	0.01801	350.96		349.295	0.00127	348.562	-0.154	351.259	0.000706374	351.359	0.00274	348.676	-0.53354
346.344	7.50761	350.091		350.283		355.013		335.909	0.14671	334.341	0.05608	351.053		349.388	-0.05015	348.654	-1.26401	351.352	-0.03743	351.452	-0.11285	348.768	-0.16072
346.372	9.23381	350.184		350.376	-0.07428	355.106		336.002		334.437	0.05245	351.145	0.11445	349.481	-0.06148	348.747	-0.18115	351.444	-0.17516	351.544	-0.0937	348.861	-0.13483
346.394	8.33251	350.276		350.469	-0.07939	355.199	-0.11788	336.095		334.529	0.07651	351.238	0.13768	349.573	-0.07505	348.84	-0.12311	351.537	-0.21523	351.637	-0.14316	348.954	-0.11147
346.415	7.40808	350.369	-0.09198	350.561	-0.08174	355.291	-0.0325	336.187	0.11633	334.622	0.04995	351.33	0.14742	349.671	-0.03757	348.932	-0.09873	351.63	-0.16527	351.729	-0.03747	349.046
346.436	6.55115	350.462	-0.14356	350.654	-0.05983	355.384		336.28	0.07966	334.714	0.06546	351.423	0.27081	349.763	-0.02786	349.025		351.722	-0.11725	351.822	-0.03385	349.139	-0.05735
346.469	4.06896	350.554	-0.14511	350.746	-0.04188	355.476	-0.34807	336.372	0.1907	334.807	0.08987	351.516	0.1692	349.856	-0.01833	349.117		351.815	-0.07153	351.915	-0.02327	349.231	-0.08076
346.561	0.56288	350.647	-0.07299	350.839	-0.01652	355.569	-0.60032	336.471	0.16792	334.899	0.09751	351.608	0.25962	349.949	0.02941	349.21	-0.09307	351.907	-0.09851	352.007		349.324	-0.05973
346.654	-0.01769	350.739	-0.07801	350.931	0.01147	355.661	-0.2654	336.563	0.16854	334.992		351.701	0.18378	350.041		349.303	-0.05316	352		352.1		349.417	-0.04568
346.746	-0.5242	350.832	-0.08037	351.024		355.754	-0.11708	336.656	0.06968	335.085		351.793	0.1361	350.134		349.395	-0.10701	352.093		352.192	0.06657	349.509	-0.05341
346.839	-0.24273	350.924	0.01138	351.117		355.847	-0.12189	336.748	0.14556	335.177		351.886	0.08792	350.227		349.488	-0.12533	352.185	-0.06048	352.285	0.04662	349.602	-0.10019
346.932	-0.10711	351.017		351.209	0.11309	355.939	-0.031	336.841	0.14668	335.27	0.09119	351.979		350.319	0.05895	349.58	-0.16566	352.278	-0.07863	352.378	-0.00353	349.699	-0.09863
347.024		351.11		351.302	0.03105	356.032		336.934	0.10872	335.363	0.07128	352.071		350.412	-0.06987	349.678	-0.10839	352.371	-0.03321	352.47	-0.18412	349.792	-0.08471
347.117		351.202	0.00396	351.395	0.03473	356.125		337.026		335.454	0.07635	352.164	0.06211	350.504	0.00474	349.771	-0.10733	352.463	-0.20548	352.563	-0.08072	349.885	-0.02968
347.21	-0.02504	351.295	0.03945	351.487	-0.02554	356.217	-0.07264	337.119		335.546	0.12316	352.256	0.03904	350.597	-0.02671	349.863	-0.06065	352.556	-0.16015	352.655	-0.1108	349.977
347.302	-0.07446	351.387	-0.08719	351.58	-0.01298	356.31	-0.01397	337.211	0.14117	335.639	0.03096	352.349	-0.02216	350.689	-0.02427	349.956	-0.02919	352.648	-0.26769	352.748	-0.04579	350.07
347.394	-0.06339	351.48	-0.07684	351.672	-0.01692	356.403	-0.09158	337.304	0.13095	335.731	0.11609	352.442	0.01001	350.782	-0.0122	350.048		352.741	-0.10496	352.841	-0.03699	350.162
347.486	-0.52996	351.572	-0.11615	351.765	-0.00456	356.495	-0.09585	337.397	0.15871	335.824	0.1222	352.534	0.0018	350.875	0.03262	350.141		352.833	-0.06218	352.933	-0.03523	350.255
347.579	-1.67054	351.665	-0.07048	351.858	-0.00662	356.588	-0.19435	337.485	0.126	335.917	0.05358	352.627	0.00448	350.967		350.234		352.926	-0.0734	353.026		350.348	0.02879
347.671	-0.26192	351.758	-0.07835	351.95	0.01531	356.68	-0.11897	337.578	0.08748	336.009		352.719	-0.0255	351.06		350.326	-0.04288	353.019		353.118		350.44	-0.06812
347.764	-0.21791	351.85	-0.00796	352.043		356.773	-0.05424	337.67	0.01247	336.102		352.812	0.03542	351.152	0.04553	350.419	-0.09686	353.111		353.211	0.01688	350.533	-0.00141
347.857	-0.20465	351.943	-0.01634	352.135	0.08942	356.866	-0.07529	337.763	0.13644	336.194	0.07736	352.904	0.09324	351.245	0.0558	350.511	-0.16373	353.204	-0.0689	353.303	-7.6601e-05	350.625	-0.03862
347.949	-0.12997	352.036		352.228	0.06499	356.958	-0.0554	337.856	0.18409	336.287	0.06809	352.997		351.338	0.03061	350.604	-0.14295	353.296	-0.06225	353.396	-0.38259	350.718	-0.04478
348.042		352.128	-0.05008	352.321	0.02793	357.051		337.948	0.1338	336.38	0.05986	353.09		351.43	-0.0408	350.697	-0.14274	353.389	-0.16594	353.489	0.28337	350.811	-0.00821
348.134	-0.10535	352.221	0.06657	352.413	0.00518	357.143	-0.06055	338.041		336.478	0.09943	353.182	0.00615	351.523	-0.04439	350.789	-0.1067	353.481	-1.24576	353.581	-0.21482	350.903	0.05028
348.227	-0.13713	352.313	-0.02095	352.506	-0.03153	357.236	-0.06126	338.133	0.06957	336.57	0.12157	353.275	0.09367	351.615	-0.03484	350.882	0.00127	353.574	-0.26707	353.674	-0.16904	350.996
348.32	-0.11601	352.406	-0.06697	352.598	-0.02638	357.329	-0.0718	338.226	0.10762	336.663	0.04831	353.367	0.04968	351.708	0.05696	350.974		353.667	-0.16573	353.766	-0.26171	351.088
348.412	-0.10104	352.499	-0.12614	352.691	-0.02434	357.421	-0.10105	338.319	0.09165	336.756	0.04968	353.46	-0.18521	351.801	0.0112	351.067		353.759	-0.2359	353.859	-0.18201	351.181	-0.03962
348.505	-0.13975	352.591	-0.17802	352.783	-0.000113671	357.514	-0.09977	338.411	0.11228	336.848	0.11279	353.553	-0.000176344	351.893	0.02964	351.159	0.05008	353.852	-0.21646	353.952	-0.09142	351.274	0.08576
348.597	-0.41358	352.684	-0.15972	352.876	0.01865	357.607	-0.11049	338.504	0.1144	336.941	0.07301	353.645	-0.12288	351.986		351.252	0.0683	353.945	-0.14847	354.044		351.366	0.02199
348.69	-0.83343	352.776	-0.13419	352.969		357.699	-0.00901	338.604		337.033		353.738	-0.06148	352.078		351.345	-0.00898	354.037		354.137	-0.03231	351.459	-0.08887
348.783	-0.1154	352.869	-0.02377	353.061		357.792	-0.03855	338.697		337.126	0.07997	353.83	-0.16325	352.171	0.04511	351.437	-0.19316	354.13	-0.1409	354.23	-0.04184	351.551	-0.04765
348.875	-0.10102	352.961		353.154	-0.03387	357.885	-0.07666	338.79		337.219	0.09405	353.923	-0.09419	352.264	0.05051	351.53	-0.18493	354.223	-0.17088	354.322	-0.0402	351.644	0.03094
348.968		353.054		353.246	-0.01774	357.977		338.882		337.311	0.04889	354.016		352.356	0.02897	351.622	-0.18377	354.315	-0.07357	354.415	-0.16464	351.736	-0.04888
349.06		353.147	-0.02888	353.339	0.03478	358.07		338.975		337.404	0.09112	354.108		352.449	-0.00741	351.715	-0.11701	354.408	-0.20562	354.508	-0.14715	351.829	0.05037
349.153	-0.04011	353.239	-0.07912	353.432	-1.2312	358.162	-0.00982	339.067		337.492	0.10325	354.201	-0.02244	352.541	0.0504	351.808	-0.04261	354.5	-0.18219	354.6	-0.05765	351.922	0.03911
349.245	-0.11174	353.332	0.03987	353.524	-0.16058	358.255	-0.00348	339.16		337.585	0.07936	354.294	-0.03234	352.634	0.06901	351.9	0.01666	354.593	-0.18192	354.693	-0.0635	352.014
349.338	-0.04822	353.424	-1.29341	353.617	-0.22974	358.348	-0.0242	339.253		337.678	0.09455	354.386	-0.13774	352.726	0.00763	351.993		354.686	-0.10969	354.785	-0.04807	352.107
349.431	-0.11901	353.517	-0.32765	353.709	-0.33665	358.44	-0.00428	339.345		337.77	0.10603	354.479	-0.12875	352.819	0.0431	352.086		354.778	-0.08599	354.878	-0.01305	352.2	0.02593
349.523	-0.04162	353.61	-0.19193	353.802	-0.23156	358.533	-0.06973	339.438		337.863	0.08508	354.572	-0.13909	352.912	0.03085	352.178	0.03146	354.871	-0.10439	354.971		352.292	0.07201
349.621	-0.11787	353.702	-0.33489	353.895	-0.1885	358.626	-0.02425	339.53		337.955	0.12342	354.664	-0.1267	353.004		352.271	-0.00985	354.963		355.063		352.385	0.07124
349.714	-0.0526	353.795	-0.23374	353.987		358.718	-0.03132	339.623		338.048		354.757	-0.05651	353.097		352.363	0.02005	355.056		355.156	-0.12949	352.477	-0.10355
349.806	-0.0773	353.887	-0.20741	354.08		358.811	-0.00233	339.715		338.141	0.00134	354.849	-0.06177	353.189	0.06466	352.456	-0.11837	355.149	-0.11621	355.248	-0.04378	352.57	-0.08819
349.899	0.01209	353.98		354.173	-0.11982	358.903	-0.03884	339.808		338.233	0.04776	354.942	-0.05339	353.282	0.09244	352.549	-0.21022	355.241	-0.12456	355.341	-0.03442	352.662	-0.07592
349.991		354.073		354.265	-0.09046	358.996		339.901		338.326	0.03924	355.035		353.375	-0.04842	352.641	-0.14594	355.334	-0.08992	355.434	-0.05627	352.755	-0.04342
350.084		354.165	-0.09234	354.358	-0.12557	359.089		339.993		338.418	0.06844	355.127	-0.05481	353.467	1.25761	352.734	-0.13325	355.426	-0.07944	355.526	-0.47281	352.848	-0.02263
350.177		354.258	-0.08046	354.451	-0.07718	359.181	-0.0372	340.086		338.511	0.12379	355.22	-0.04566	353.56	0.04914	352.826	-0.02232	355.519	-0.63588	355.619	-0.18184	352.94	-0.00331
350.269		354.351	-0.09908	354.543	-0.08585	359.274	-0.00515	340.179	0.20178	338.612		355.312	-0.00973	353.652	-0.10012	352.919	-0.08122	355.612	-0.16782	355.711	-0.09255	353.033
350.362	-0.02309	354.443	-0.21684	354.636	-0.09482	359.366	-0.07629	340.271	0.19083	338.704		355.405	-0.09331	353.745	-0.14871	353.011		355.704	-0.13464	355.804	-0.07925	353.125	0.02918
350.454	0.0102	354.536	-0.15338	354.728	-0.01367	359.459	-0.09114	340.364	0.08489	338.797		355.498	-0.34069	353.838	-0.09135	353.104		355.797	-0.03241	355.897	-0.05157	353.218	-0.00588
350.547	-0.04599	354.629	-0.12112	354.821	-0.05915	359.552	-0.05099	340.465	0.16431	338.889		355.59	-0.28086	353.93	-0.11428	353.197	-0.01832	355.89	-0.05274	355.989		353.311	0.09265
350.639	-0.02475	354.721	-0.05857	354.913	-0.0484	359.644	-0.14031	340.558	0.13002	338.982		355.683	-0.06938	354.023		353.289	0.05623	355.982		356.082		353.403	-0.33176
350.732	-0.05186	354.814	-0.04634	355.006		359.737	-0.02139	340.651	0.12292	339.074		355.775	-0.03934	354.116		353.382	-0.31607	356.075		356.175	-0.04044	353.496	-0.50473
350.825	-0.01396	354.906	-0.06133	355.099		359.829	0.03173	340.743	0.12437	339.167		355.868	-0.04251	354.208	-0.03677	353.474	-0.88122	356.167	-0.01839	356.267	0.01255	353.588	-0.19324
350.917	-0.02466	354.999		355.191	-0.09931	359.922	0.03893	340.836	0.18276	339.26		355.961		354.301	-0.02169	353.567	-0.31164	356.26	-0.02277	356.36	0.00566	353.681	-0.13233
351.01		355.092		355.284	-0.11553	360.015		340.928	0.07957	339.352		356.053		354.394	-0.10427	353.659	-0.28701	356.353	-0.07699	356.452	-0.07997	353.774	-0.21947
351.102		355.184	-0.10846	355.377	-0.07529	360.107		341.021		339.445		356.146	-0.04371	354.486	-0.09974	353.752	-0.22946	356.445	-0.00991	356.545	-0.04457	353.866	-0.17905
351.195	-0.00452	355.277	-0.12113	355.469	-0.23107	360.2	0.00151	341.113		339.537		356.239	-0.02537	354.579	-0.11725	353.845	-0.18577	356.538	-0.06895	356.638	-0.00989	353.959
351.288	0.038	355.369	-0.11221	355.562	-0.52278	360.293	-0.0107	341.206	0.16635	339.63		356.331	0.00373	354.671	-0.06745	353.937	-0.13278	356.63	-0.08501	356.73	-0.03598	354.051
351.38	0.05749	355.462	-0.14878	355.654	-0.17913	360.385	-0.05574	341.299	0.11984	339.723		356.424	-0.00369	354.764	-0.0072	354.03		356.723	-0.08456	356.823	-0.02577	354.144	-0.02793
351.473	-0.02095	355.555	-1.06649	355.747	-0.14406	360.478	-0.06162	341.391	0.09799	339.815		356.516	-0.06164	354.857	-0.0089	354.123		356.816	-0.05084	356.916	-0.0507	354.237	0.00172
351.565	-0.14714	355.647	-0.17176	355.84	-0.06098	360.57	-0.0738	341.484	0.11219	339.908		356.609	-0.08536	354.949	-0.01747	354.215	-0.05233	356.908	-0.01175	357.008		354.329	-0.03733
351.658	-0.21888	355.74	-0.14613	355.932	-0.04725	360.663	-0.04209	341.576	0.15733	340		356.702	-0.09023	355.042		354.308	-0.03816	357.001		357.101		354.422	-0.09145
351.751	-0.10871	355.832	-0.09175	356.025		360.756	-0.03186	341.669	0.09391	340.093		356.794	-0.03528	355.134	-0.02447	354.401	-0.14397	357.094		357.193	0.01715	354.515	-0.13844
351.843	-0.15436	355.925	-0.03672	356.117		360.848	0.02025	341.762	0.08702	340.186	0.1107	356.887	-0.02333	355.227	0.01327	354.493	-0.21268	357.186	-0.07515	357.286	0.0098	354.607	-0.09704
351.936	-0.07647	356.018		356.21	-0.04819	360.941	0.00177	341.854	0.12027	340.278	0.06993	356.98		355.32	0.02082	354.586	-0.16126	357.279	-0.05349	357.379	-0.01015	354.7	-0.00874
352.029		356.11		356.303	-0.00185	361.034		341.947	0.10935	340.371	0.06135	357.072		355.412	-0.02056	354.678	-0.19062	357.371	-0.09917	357.471	-0.02373	354.792	-0.01494
352.121		356.203	-0.05832	356.395	-0.07282	361.126	-0.00209	342.039		340.472	0.0662	357.165	0.00445	355.505	-0.29064	354.771	-0.06169	357.464	-0.03487	357.564	-0.01588	354.885	-0.04883
352.214	-0.03843	356.296	0.000480488	356.488	-0.05205	361.219	0.04266	342.132	0.13329	340.565	0.09071	357.257	-0.03733	355.597	-0.17042	354.864	-0.00752	357.557	-0.03769	357.657	0.01208	354.978
352.306	-0.00854	356.388	-0.04905	356.581	-0.06042	361.311	-0.00604	342.224	0.11395	340.658	0.03163	357.35	-0.05588	355.69	-0.0927	354.956	0.00527	357.649	-0.03497	357.749	-0.02863	355.07
352.399	-0.06132	356.481	-0.12114	356.673	-0.03552	361.404	0.00478	342.317	0.12756	340.75	0.08944	357.443	0.01257	355.783	-0.02473	355.049		357.742	-0.0287	357.842	-0.02133	355.163	-0.08554
352.491	-0.04305	356.573	-0.07724	356.766	-0.03185	361.496	0.01579	342.41	0.12785	340.843	0.06328	357.535	-0.01787	355.875	-0.00276	355.142	-0.0453	357.835	-0.04874	357.934	0.01813	355.256	-0.03395
352.584	-0.06245	356.666	-0.1021	356.858	-0.0286	361.589	-0.03717	342.502	0.07592	340.935	0.07992	357.628	0.01095	355.968		355.234	-0.08866	357.927	-0.04462	358.027		355.348	-0.02902
352.677	-0.11402	356.759	-0.0678	356.951	-0.00758	361.682	0.01818	342.6	0.04786	341.028		357.721	0.01108	356.061		355.327	-0.0274	358.02		358.12		355.441	-0.04696
352.769	-0.06213	356.851	-0.02238	357.044		361.774	-0.07604	342.692	0.07441	341.121		357.813	0.03104	356.153	0.00808	355.419	-0.13725	358.113		358.212	0.03348	355.533	-0.47958
352.862	-0.07893	356.944	-0.05869	357.136	-0.11625	361.867	0.03571	342.785	0.15739	341.213	0.05566	357.906	-0.00296	356.246	-0.00726	355.512	-0.57274	358.205	0.00539	358.305	0.02492	355.626	-0.15377
352.954	-0.00631	357.037		357.229	-0.13493	361.96		342.878	0.16875	341.306	0.05054	357.999		356.338	-0.01642	355.605	-0.25562	358.298	-0.00781	358.398	0.03618	355.719	-0.10176
353.047		357.129	-0.09842	357.322	-0.09799	362.052		342.97		341.398	0.06583	358.091		356.431	-0.03006	355.697	-0.13189	358.391	-0.04676	358.49	0.02137	355.811	-0.07829
353.14	-0.05917	357.222	-0.09142	357.414	-0.11316	362.145	0.04487	343.063		341.491	0.10903	358.184	0.01665	356.524	-0.02392	355.79	-0.09658	358.483	-0.04484	358.583	0.00658	355.904	0.01086
353.232	-0.04056	357.314	-0.0604	357.507	-0.09557	362.237	-0.01735	343.155	0.14444	341.584	0.029	358.277	-0.04189	356.616	-0.02172	355.882	-0.02395	358.576	-0.02448	358.676	-0.03054	355.996
353.325	0.01705	357.407	-0.10829	357.599	-0.14523	362.33	0.03912	343.248	0.10275	341.676	-0.00227	358.369	0.02343	356.709	-0.02399	355.975		358.668	-0.03129	358.768	-0.01122	356.089
353.417	-1.12473	357.5	-0.16843	357.692	-0.08204	362.423	0.06052	343.34	0.11962	341.769	0.06176	358.462	0.01203	356.801	-0.00976	356.068		358.761	-0.02825	358.861	0.06965	356.182	-0.01506
353.51	0.10083	357.592	-0.0718	357.785	-0.10217	362.515	-0.00845	343.433	0.08122	341.861	0.09295	358.554	-0.00354	356.894	-0.03269	356.16	-0.02196	358.854	-0.01359	358.953	0.03928	356.274	0.0028
353.602	-0.21664	357.685	-0.04349	357.877	-0.05893	362.608	0.03982	343.526	0.08053	341.954	0.02614	358.647	-0.00464	356.987		356.253	-0.01211	358.946	-0.03018	359.046		356.367	0.01653
353.695	-0.17725	357.778	-0.04678	357.97		362.701	0.03662	343.618	0.08041	342.046		358.74	0.06514	357.079		356.346	-0.02451	359.039		359.139	-0.07351	356.46	-0.08978
353.788	-0.18523	357.87	-0.09593	358.063		362.793	0.04758	343.711	0.05771	342.139	0.09336	358.832	0.02876	357.172	-0.01042	356.438	-0.06437	359.131	0.000482681	359.231	0.02165	356.552	-0.05747
353.88	-0.14805	357.963		358.155	-0.05621	362.886	0.02887	343.803	0.14232	342.231	0.07896	358.925	0.05457	357.265	-0.03473	356.531	-0.08271	359.224	-0.03058	359.324	0.01826	356.645	-0.05628
353.973		358.056		358.248	-0.00247	362.979		343.896	0.10801	342.324	0.13393	359.017		357.357	0.01801	356.623	-0.08776	359.317	-0.05165	359.416	-0.0137	356.737	-0.05214
354.066		358.148	-0.04761	358.341	0.55993	363.071		343.989		342.417	0.07865	359.11		357.45	-0.03066	356.716	-0.06845	359.409	0.00232	359.509	-0.01622	356.83	-0.03499
354.158	-0.1094	358.241	-0.03236	358.433	0.07193	363.164	-0.06278	344.081		342.509	0.06781	359.203	0.01252	357.543	-0.03123	356.809	-0.07577	359.502	-0.09659	359.602	-0.00954	356.923	-0.02295
354.251	-0.14316	358.334	-0.00356	358.526	0.08358	363.256	-0.04268	344.174	0.13926	342.607	0.04114	359.295	-0.02287	357.635	-0.0096	356.901	-0.01984	359.594	-0.03715	359.694	-0.00129	357.015
354.344	-0.13309	358.426	0.01964	358.618	0.01759	363.349	-0.03903	344.266	0.07391	342.699	0.11137	359.388	-0.00282	357.728	0.00465	356.994		359.687	-0.04355	359.787	0.08062	357.108
354.436	-0.11989	358.519	-0.02453	358.711	-0.01701	363.442	-0.01171	344.359	0.10973	342.792	0.07467	359.48	0.00956	357.82	0.00605	357.087		359.78	-0.03767	359.879	0.04685	357.2	-0.08523
354.529	-0.08041	358.611	-0.08891	358.804	0.0817	363.534	-0.01594	344.452	0.16062	342.885	0.06087	359.573	-0.04874	357.913	-0.02853	357.179	-0.07708	359.872	-0.02122	359.972		357.293	-0.04652
354.621	-0.10662	358.704	-0.03442	358.896	0.16155	363.627	-0.02771	344.544	0.1999	342.977		359.666	-0.00751	358.006		357.272	-0.0578	359.965		360.065		357.386	-0.02029
354.714	-0.05389	358.797	-0.03392	358.989		363.72	-0.01934	344.637	0.05705	343.07		359.758	0.00533	358.098		357.364	-0.01647	360.058		360.157	0.06302	357.478	-0.04431
354.807	-0.05762	358.889	-0.02921	359.081		363.812	-0.00948	344.729	0.09116	343.162	0.03138	359.851	0.0626	358.191	-0.00711	357.457	-0.07983	360.15	-0.07725	360.25	0.04094	357.571	-0.0497
354.899	-0.01631	358.982		359.174	0.14085	363.905	-0.00432	344.822	0.18613	343.255	0.05459	359.944	0.07944	358.284	-0.04001	357.55	-0.06733	360.243	-0.02883	360.343	0.03758	357.664	0.00537
354.992		359.074		359.267	0.05624	363.998		344.915	0.11944	343.348	0.07839	360.036		358.376	-0.0134	357.642	-0.04818	360.335	-0.06589	360.435	-0.01843	357.756	-0.06417
355.084		359.167	-0.0416	359.359	-0.00355	364.09		345.007		343.44	0.13387	360.129	0.08896	358.469	-0.02769	357.735	-0.04903	360.428	-0.1046	360.528	-0.01146	357.849	-0.03415
355.177	-0.08777	359.26	-0.03729	359.452	0.08684	364.183	-0.00389	345.1		343.533	0.09464	360.221	0.05967	358.562	0.02287	357.828	-0.03694	360.521	-0.13077	360.62	-0.04173	357.942	0.02397
355.27	-0.08539	359.352	-0.1158	359.545	0.0398	364.275	0.04116	345.192	0.17338	343.625	0.10049	360.314	0.07666	358.654	-0.02468	357.92	-0.06076	360.613	-0.09794	360.713	0.00738	358.034
355.362	-0.05835	359.445	-0.05717	359.637	0.03039	364.368	-0.00336	345.285	0.19712	343.718	0.09378	360.407	-0.04136	358.747	0.02795	358.013		360.706	-0.05209	360.805	0.00862	358.127	-0.000788092
355.455	-0.0828	359.537	-0.09628	359.73	0.11536	364.461	0.04324	345.378	0.21668	343.811	0.09172	360.499	-0.00408	358.839	-0.01807	358.106		360.798	-0.01573	360.898	-0.00631	358.22	0.02531
355.547	-0.26615	359.63	-0.10023	359.822	-0.03501	364.553	-0.04419	345.477	0.16655	343.903	0.10907	360.592	-0.00358	358.932	0.033	358.198	-0.01958	360.891	-0.01299	360.991		358.312	0.00563
355.64	-0.11143	359.723	-0.07448	359.915	0.06819	364.646	-0.05641	345.569	0.07633	343.996		360.684	-0.01714	359.024		358.291	-0.03239	360.984		361.084		358.405	0.02926
355.733	-0.10528	359.815	-0.06047	360.008		364.739	0.04758	345.662	0.20043	344.088		360.777	0.0086	359.117		358.383	-0.05827	361.076		361.176	-0.0128	358.497	-0.03273
355.825	-0.06676	359.908	-0.05382	360.1		364.831	0.03697	345.754	0.14122	344.181	0.09248	360.87	0.04656	359.21	0.00285	358.476	0.01814	361.169	-0.0307	361.269	-0.04537	358.59	-0.04627
355.918	-0.02215	360		360.193	-0.01788	364.924	-0.06645	345.847	0.1654	344.274	0.07909	360.962		359.302	-0.06222	358.569	-0.07862	361.261	-0.03397	361.361	-0.0481	358.683	-0.06054
356.011		360.093		360.285	0.01912	365.017		345.939	0.15305	344.366	0.08771	361.055		359.395	0.0316	358.661	-0.09298	361.354	-0.02416	361.454	0.01664	358.775	-0.00102
356.103		360.186	-0.01953	360.378	-0.08155	365.109		346.032		344.459	0.06194	361.148	0.0395	359.488	-0.02145	358.754	-0.04806	361.447	0.01947	361.546	0.02168	358.868	0.00234
356.196	-0.00901	360.278	-0.00432	360.471	0.0133	365.202	-0.02658	346.125		344.551	0.05392	361.24	-0.08021	359.58	-0.03252	358.847	-0.04909	361.539	0.02253	361.639	0.06743	358.96
356.288	-0.03556	360.371	0.02551	360.563	0.026	365.294	-0.01767	346.217	0.16591	344.644	0.08798	361.333	-0.0086	359.673	-0.00932	358.939	0.00985	361.632	-0.00379	361.732	0.04676	359.053
356.381	-0.01388	360.464	-0.11544	360.656	0.00846	365.387	-0.0498	346.511	7.04278	344.736	0.08863	361.425	-0.00536	359.765	0.02153	359.032		361.725	-0.04584	361.824	0.06113	359.146	-0.000332969
356.474	-0.05182	360.556	-0.05706	360.748	0.06219	365.48	0.01519	346.604	5.21637	344.829	0.04419	361.518	-0.0102	359.858	-0.04521	359.124		361.817	-0.02672	361.917	0.03375	359.238	-0.03124
356.566	-0.04713	360.649	-0.08222	360.841	-0.0395	365.572	-0.05025	346.697	1.35417	344.922	0.05615	361.61	0.06769	359.951	-0.024	359.217	-0.03563	361.91	-0.04513	362.009		359.331	0.00185
356.659	-0.07062	360.741	-0.05508	360.934	0.08106	365.665	0.00511	346.789	0.00824	345.014		361.703	0.00706	360.043		359.309	-0.09329	362.002		362.102		359.423	0.0068
356.751	0.0092	360.834	0.02425	361.026		365.758	0.01324	346.882	-0.03726	345.107		361.796	0.04051	360.136	0.04279	359.402	-0.00608	362.095		362.195	0.07681	359.516	-0.05742
356.844	-0.00986	360.927	-0.01532	361.119		365.85	0.01029	346.975		345.2	0.09103	361.888	-0.0055	360.229	-0.00533	359.495	-0.08019	362.188	0.04576	362.287	0.07309	359.609	-0.08385
356.937	-0.02353	361.019		361.212	-0.05313	365.943	0.03217	347.067		345.292	0.07587	361.981		360.321	0.03477	359.587	-0.09378	362.28	-0.0675	362.38	0.04365	359.701	-0.04466
357.029		361.112		361.304	-0.02365	366.036		347.16		345.385	0.06753	362.074		360.414	-0.02093	359.68	-0.0186	362.373	-0.03445	362.473	0.00528	359.794	-0.0267
357.122		361.204	-0.04347	361.397	-0.01347	366.128	0.00908	347.252	-0.04815	345.484	0.2174	362.166	-0.000467205	360.506	-0.01779	359.773	-0.04823	362.465	-0.01443	362.565	0.00727	359.887	-0.02201
357.215	-0.08831	361.297	-0.03305	361.489	-0.00314	366.221	0.0114	347.345	-0.25202	345.576	0.20937	362.259	0.02244	360.599	-0.08945	359.865	0.02241	362.558	0.01293	362.658	-0.04104	359.979
357.307	-0.06725	361.39	-0.04901	361.582	0.02061	366.314	0.05089	347.422	-0.09547	345.669	0.11125	362.351	-0.02782	360.691	-0.0332	359.958	-0.02346	362.651	-0.06059	362.751	0.00778	360.072
357.4	-0.12919	361.482	-0.06439	361.675	0.01315	366.406	-0.01831	347.515	-1.00098	345.761	0.08697	362.444	0.00484	360.784	-0.00533	360.05		362.743	-0.00672	362.843	0.0247	360.164	0.04728
357.493	-0.07867	361.575	-0.03222	361.767	0.03611	366.499	-0.01834	347.607	-0.62959	345.854	0.07625	362.537	-0.04423	360.877	0.01962	360.143	0.04175	362.836	-0.05867	362.936	0.02055	360.257	-0.01716
357.585	-0.0328	361.667	-0.05794	361.86	-0.00195	366.592	-0.04653	347.7	-0.17979	345.947	0.15456	362.629	-0.03119	360.969		360.236	0.01976	362.929	0.02723	363.029		360.35	-0.00406
357.678	-0.07234	361.76	-0.01917	361.952	0.02117	366.684	-0.03233	347.793	-0.14431	346.039		362.722	0.00437	361.062		360.328	0.01606	363.021		363.121		360.442	-0.08361
357.771	-0.01451	361.853	-0.05835	362.045		366.777	-0.01054	347.885	-0.10063	346.132	0.08304	362.815	-0.01902	361.155	-0.00583	360.421	-0.07528	363.114		363.214	-0.07708	360.535	-0.11592
357.863	-0.06169	361.945	-0.05863	362.138	0.02105	366.87	-0.02425	347.978		346.224	0.10956	362.907	0.00418	361.247	-0.04995	360.513	-0.12822	363.207	-0.03055	363.306	0.00831	360.627	-0.1057
357.956	-0.04322	362.038		362.23	-0.00273	366.962		348.07		346.519	7.60327	363		361.34	-0.02747	360.606	-0.05124	363.299	-0.04279	363.399	-0.07101	360.72	-0.04964
358.048		362.131	0.02773	362.323	0.00591	367.055		348.163	-0.05314	346.611	1.19402	363.093		361.432	0.04426	360.699	-0.10638	363.392	-0.02991	363.492	-0.03094	360.813	0.01829
358.141	-0.03177	362.223	-0.00372	362.415	0.00285	367.148	-0.04022	348.256	-0.07468	346.704	-0.04255	363.185	0.02824	361.525	0.03315	360.791	-0.01965	363.484	-0.0607	363.584	-0.0784	360.905	0.01862
358.234	0.07646	362.316	-0.0337	362.508	-0.01319	367.24	0.00023391	348.348	-0.05059	346.796	-0.14286	363.278	-0.07265	361.618	0.000903813	360.884	-0.00884	363.577	-0.0349	363.677	-0.02822	360.998
358.326	0.05481	362.408	-0.00438	362.601	-0.0531	367.333	-0.00761	348.441	-0.01078	346.889	-0.12076	363.37	-0.10841	361.71	0.01826	360.977		363.67	-0.03962	363.77	-0.02195	361.091
358.419	0.07646	362.501	-0.05995	362.693	-0.12697	367.425	-0.17707	348.533	-0.08219	346.982		363.463	-0.02103	361.803	0.0232	361.069		363.762	0.02655	363.862	0.03571	361.183	0.00169
358.512	0.06824	362.594	0.02325	362.786	-0.03117	367.518	-0.54017	348.626	-0.99937	347.074		363.556	-0.03165	361.895	0.04907	361.162	-0.00162	363.855	0.0032	363.955	0.04626	361.276	-0.07092
358.604	0.09749	362.686	-0.01495	362.879	-0.09636	367.611	0.01212	348.718	-0.38552	347.167		363.648	-0.0862	361.988		361.254	-0.01894	363.948	-0.000343386	364.048		361.368	-0.05006
358.697	-0.02029	362.779	-0.05738	362.971		367.703	-0.07345	348.811	-0.05595	347.26	-0.0876	363.741	-0.06182	362.081		361.347	-0.05772	364.04		364.14	0.02271	361.461	-0.04606
358.789	-0.01888	362.872	-0.02848	363.064		367.796	-0.03801	348.904	-0.02115	347.352	-0.08425	363.834	0.02405	362.173	0.03089	361.44	-0.02702	364.133	0.01543	364.233	0.01371	361.554	-0.04291
358.882	0.00213	362.964		363.157	-0.08543	367.889	0.03134	348.996		347.429	-0.08446	363.926	-0.01687	362.266	0.03672	361.532	-0.05826	364.226	0.01542	364.325	0.05696	361.646	0.01283
358.975		363.057		363.249	-0.05687	367.981		349.089		347.522	-0.78155	364.019		362.358	0.00263	361.625	-0.01824	364.318	0.03393	364.418	-0.02893	361.739	-0.02027
359.067		363.15	0.00644	363.342	-0.0738	368.074		349.181	-0.03095	347.614	-0.42426	364.112		362.451	0.04139	361.717	-0.04892	364.411	-0.07262	364.511	-0.07352	361.831	0.00484
359.16	0.03162	363.242	0.0047	363.434	-0.10406	368.166	0.01175	349.274	-0.02419	347.707	-0.20108	364.204	-0.02835	362.544	-0.004	361.81	-0.04235	364.503	-0.01618	364.603	-0.09435	361.924	0.07143
359.252	0.000987203	363.335	-0.03573	363.527	-0.11803	368.259	0.00345	349.367	-0.03956	347.8	-0.18372	364.297	0.06258	362.636	0.05171	361.903	-0.02751	364.596	-0.01583	364.696	-0.02557	362.017
359.345	-0.02793	363.427	-0.02272	363.62	-0.05356			349.459	-0.0095	347.892	-0.10497	364.389	-0.03007	362.729	0.03866	361.995		364.689	-0.07218	364.789	0.01415	362.109
359.438	-0.02615	363.52	-0.07538	363.712	-0.13306			349.552	-0.00858	347.985		364.482	-0.06117	362.822	0.05037	362.088		364.781	-0.01506	364.881	0.02153	362.202	0.02515
359.53	0.02092	363.613	-0.05144	363.805	-0.00995			349.649	-0.02702	348.077		364.575	-0.03715	362.914	0.04366	362.18	-0.01737	364.874	0.00913	364.974		362.294	-0.01429
359.623	-0.09988	363.705	-0.07583	363.898	-0.06612			349.742	-0.06261	348.17	-0.10011	364.667	-0.00571	363.007		362.273	-0.02289	364.967		365.067		362.387	0.00472
359.716	0.05033	363.798	0.01591	363.991				349.835	-0.00489	348.263	-0.0833	364.76	-0.02462	363.1		362.366	0.02482	365.059		365.159	-0.02076	362.48	0.01699
359.808	0.057	363.891	0.01626	364.083				349.927	0.02648	348.355	-0.07658	364.853	0.01341	363.192	0.05313	362.458	-0.10174	365.152	0.01404	365.252	-0.04524	362.572	-0.01212
359.901	0.07743	363.983		364.176	-0.04815			350.02		348.448	-0.01655	364.945	0.00527	363.285	0.00738	362.551	-0.02183	365.245	0.01352	365.344	-0.02612	362.665	0.00737
359.993		364.076		364.268	-0.01505			350.113		348.54	0.01773	365.038		363.378	-0.00456	362.644	-0.04503	365.337	-0.03002	365.437	-0.05899	362.758	0.01841
360.086		364.169	0.000668056	364.361	0.0327			350.205		348.633	-0.80101	365.131	-0.04725	363.47	-0.02843	362.736	0.00951	365.43	-0.01357	365.53	-0.04783	362.85	-0.00764
360.179	0.08215	364.261	0.02057	364.454	0.00725			350.298		348.726	0.11853	365.223	-0.02119	363.563	-0.0674	362.829	-0.02621	365.522	-0.03415	365.622	-0.07318	362.943	0.02756
360.271	0.04029	364.354	-0.06271	364.546	0.00882			350.39	-0.00288	348.818	0.34876	365.316	-0.05434	363.655	-0.0604	362.922	0.04236	365.615	-0.03725	365.715	-0.00764	363.036
360.364	0.05217	364.446	-0.02331	364.639	0.0471			350.483	0.02978	348.911	0.40638	365.408	-0.03019	363.748	0.01988	363.014		365.708	0.01863	365.808	0.03444	363.128	-0.0217
360.456	-0.01131	364.539	-0.13681	364.731	0.11361			350.575	0.0436	349.003		365.501	-0.03452	363.841	0.01281	363.107		365.8	-0.01324	365.9	0.02068	363.221	-0.00742
360.549	0.05251	364.632	-0.06126	364.824	0.33567			350.668	0.0614	349.096		365.594	-0.08012	363.934	0.01431	363.2	0.01695	365.893	-0.02248	365.993		363.313	0.02805
360.641	0.06676	364.724	0.00912	364.917	0.29407			350.761	-0.0046	349.188	0.72221	365.686	-0.04299	364.026		363.292	0.00875	365.986		366.086		363.406	-0.0346
360.734	0.15457	364.817	0.02615	365.01				350.853	0.03017	349.281	0.79618	365.779	0.01146	364.119		363.385	-0.04745	366.079		366.178	0.0581	363.499	-0.06301
360.827	0.11738	364.91	0.01101	365.102				350.946	0.06923	349.374	0.82991	365.872	0.03906	364.211	0.03712	363.477	-0.09185	366.171	-0.01075	366.271	0.0113	363.591	-0.0656
360.919	0.12157	365.002		365.195	0.14422			351.038		349.466	1.24537	365.964		364.304	0.08277	363.57	-0.00336	366.264	-0.02065	366.364	0.02005	363.684	-0.08188
361.012		365.095		365.287	0.0522			351.131	0.06225	349.559	1.30505	366.057		364.397	-0.09896	363.663	-0.06053	366.357	-0.01536	366.456	-0.08789	363.777	-0.00219
361.105		365.188	0.01376	365.38	0.01652			351.224	0.09463	349.657	-0.16589	366.15	0.17558	364.489	-0.04224	363.755	-0.01734	366.449	-0.0478	366.549	-0.10978	363.869	0.00156
361.197	-0.00132	365.28	-0.04236	365.473	0.09393			351.316	0.14189	349.749	-0.12412	366.242	0.12758	364.582	-0.07109	363.848	0.00229	366.542	-0.06087	366.642	-0.04151	363.962
361.29	0.0264	365.373	-0.04247	365.565	0.02496			351.409	0.04627	349.842	-0.1404	366.335	0.1198	364.675	0.0071	363.941	0.01163	366.634	0.00241	366.734	-0.04436	364.055
361.382	-0.03699	365.465	-0.06213	365.658	-0.07262			351.501	0.04348	349.934	-0.0689	366.428	0.00732	364.767	0.05614	364.033		366.727	-0.0144	366.827	0.000965897	364.147	0.02824
361.475	0.01308	365.558	-0.06898	365.75	0.01908			351.594	0.03923	350.027		366.52	0.03635	364.86	0.02112	364.126	0.01884	366.82	-0.00317	366.92	-0.02407	364.24	0.0491
361.568	-0.00504	365.651	-0.00912	365.843	0.00236			351.686	0.02964	350.12		366.613	0.02761	364.953	0.04435	364.219	0.00966	366.912	0.00567	367.012		364.333	0.1112
361.66	-0.04206	365.743	-0.02187	365.936	0.01115			351.779	0.12535	350.212		366.706	0.03408	365.045		364.311	0.06544	367.005		367.105		364.425	-0.03132
361.753	-0.01092	365.836	0.0219	366.029				351.872	0.09131	350.305		366.798	0.06614	365.138	0.01353	364.404	-0.10784	367.098		367.198	0.00912	364.518	-0.07465
361.846	0.08793	365.929	-0.03219	366.121				351.964		350.397	-0.20054	366.891	0.0417	365.23	-0.00641	364.496	-0.05195	367.19	-0.02299	367.29	-0.00434	364.61	-0.04285
361.938	0.00651	366.021		366.214	-0.05192			352.057		350.49	-0.09409	366.984		365.323	-0.00306	364.589	-0.08389	367.283	0.02587	367.383	-0.02149	364.703	-0.04949
362.031		366.114		366.307	0.00231			352.15	0.10668	350.583	-0.14667	367.076		365.416	-0.00865	364.682	-0.08857	367.376	-0.04795	367.475	-0.64633	364.796	0.02042
362.123		366.207	-0.01037	366.399	-0.07898			352.242	0.08135	350.675	-0.1193	367.169	-0.06043	365.508	-0.03953	364.774	-0.000135815	367.468	-0.73668	367.568	-0.10782	364.888	-0.01386
362.216	-0.01285	366.299	0.01414	366.492	0.00201			352.335	0.15931	350.768	-0.06326	367.262	0.04611	365.601	-0.00785	364.867	0.03611	367.561	-0.10575	367.661	-0.02727	364.981
362.309	-0.02449	366.392	0.00945	366.584	-0.02733			352.427	0.0486	350.86	-0.01196	367.354	-0.00364	365.693	-0.0214	364.96		367.653	-0.04966	367.753	-0.00236	365.074
362.401	-0.02193	366.485	-0.03382	366.677	-0.08083			352.52	0.03642	350.953	-0.02351	367.447	-0.20727	365.786	0.05067	365.052		367.746	-0.00502	367.846	-0.02802	365.166	-0.01448
362.494	-0.01706	366.577	-0.00481	366.77	0.02226			352.613	0.02882	351.045		367.539	-0.18228	365.879	0.00738	365.145	-0.05528	367.839	0.04805	367.939	-0.02971	365.259	-0.04042
362.586	-0.02233	366.67	-0.04498	366.862	-0.01426			352.705	0.01284	351.138	-0.0175	367.632	-0.00751	365.971		365.237	-0.04336	367.931	-0.02853	368.031		365.351	-0.01866
362.679	-0.04226	366.763	-0.01882	366.955	-0.0762			352.798	0.12766	351.231	-0.00187	367.725	-0.02371	366.064		365.33	-0.03859	368.024		368.124		365.444	-0.02702
362.772	-0.0221	366.855	-0.04625	367.048				352.89	0.04201	351.323	0.04894	367.817	-0.00476	366.157	0.06808	365.423	-0.07736	368.117		368.216	0.02154	365.537	-0.04878
362.865	-0.06565	366.948	-0.01574	367.141	-0.04797			352.983		351.416	-0.12018	367.91	0.00498	366.25	0.02807	365.515	-0.03305	368.209	0.04194	368.309	-0.01649	365.629	-0.08044
362.957	-0.0395	367.041		367.233	-0.01856			353.076		351.508	-0.07886	368.003		366.342	0.04138	365.608	-0.0811	368.302	0.017			365.722	0.02019
363.05		367.133	-0.07458	367.326	-0.0914			353.168	0.05994	351.601	-0.18447	368.095		366.435	-0.04505	365.701	-0.07798					365.815	0.05417
363.142	-0.03062	367.226	-0.04974	367.418	-0.29218			353.261	0.06025	351.694	-0.13397	368.188	0.03031	366.527	-0.04154	365.793	0.0338					365.907	0.01865
363.235	-0.06236	367.319	-0.01137	367.511	-0.56468			353.353	0.0601	351.786	-0.09713	368.281	0.03748	366.62	-0.01973	365.886	-0.01356					366
363.328	-0.03572	367.411	-0.11537	367.604	-0.10539			353.446	-0.05192	351.879	-0.0025			366.713	-0.00761	365.979						366.093
363.42	-0.02084	367.504	-0.81769	367.696	-0.02333			353.538	-0.07651	351.972				366.806	-0.00103	366.071						366.185	0.0303
363.513	-0.05804	367.596	-0.11062	367.789	-0.06731			353.631	-0.04624	352.064				366.898	-0.00778	366.164	-0.04557					366.278	0.04936
363.606	-0.01971	367.689	-0.02723	367.881	-0.03829			353.724	-0.18771	352.157	-0.00474			366.991		366.257	0.01422					366.371	0.01203
363.698	-0.03436	367.782	-0.01139	367.974				353.816	-0.17662	352.249	-0.03359			367.084		366.349	-0.02956					366.463	-0.04287
363.791	0.05418	367.874	-0.007	368.067				353.909	-0.05114	352.342	0.00721			367.176	0.01756	366.442	-0.08944					366.556	-0.03829
363.884	-0.01943	367.967		368.159	-0.05095			354.002		352.435	-0.12047			367.269	-0.01051	366.535	-0.05922					366.649	-0.08458
363.976		368.06		368.252	-0.0491			354.094		352.527	-0.16397			367.361	0.00114	366.627	-0.07053					366.741	-0.01521
364.069		368.152	-0.00685					354.187	-0.07545	352.62	-0.1899			367.454	-0.27365	366.72	-0.03448					366.834	0.02407
364.161	0.00336	368.245	-0.0211					354.279	-0.02589	352.712	-0.09186			367.547	-0.09932	366.813	-0.05472					366.927	-0.04746
364.254	-0.02341							354.372	-0.12959	352.805	-0.02079			367.639	-0.04896	366.905	-0.02742					367.019
364.347	0.03697							354.465	-0.22883	352.897	0.00402			367.732	0.01664	366.998						367.112
364.439	-0.02017							354.557	-0.11838	352.99				367.824	-0.02315	367.091						367.205	-0.01605
364.532	-0.04834							354.65	-0.11242	353.083				367.917	0.01556	367.183	-0.02297					367.297	-0.02519
364.625	-0.00321							354.743	-0.08125	353.175	-0.01417			368.01		367.276	-0.03518					367.39	-0.00058068
364.717	-0.07229							354.835	-0.02098	353.268	-0.02365			368.102		367.369	-0.01281					367.483	-0.61033
364.81	0.01024							354.928	-0.05015	353.36	-0.03895			368.195	0.05021	367.461	-0.57405					367.575	-0.10668
364.903	0.05637							355.02		353.453	-0.79009			368.288	0.00909	367.554	-0.15575					367.668	-0.05031
364.995								355.113		353.545	-0.09645					367.646	-0.05972					367.76	-0.00142
365.088								355.206	-0.03844	353.638	-0.19946					367.739	-0.00472					367.853	-0.04156
365.18	-0.02644							355.298	-0.03488	353.731	-0.23628					367.832	-0.03565					367.946	-0.01169
365.273	-0.02128							355.391	-0.10867	353.823	-0.20253					367.924	-0.01501					368.038
365.366	0.00551							355.483	-0.45635	353.916	-0.19135					368.017						368.131	-0.02997
365.458	-0.04789							355.576	-0.4047	354.009						368.11						368.224	0.01781
365.551	0.00845							355.669	-0.11296	354.101						368.202	-0.0064					368.316	0.01928
365.643	-0.05568							355.761	-0.04415	354.194	-0.06687					368.295	0.02443
365.736	-0.09563							355.854	-0.02235	354.287	-0.01546
365.829	-0.06083							355.947	-0.06168	354.379	-0.09206
365.922	0.00765							356.039		354.472	-0.17015
366.014								356.132	-0.03168	354.564	-0.14215
366.107								356.224	-0.01544	354.657	-0.14552
366.2	-0.06211							356.317	-0.0481	354.75	-0.07544
366.292	0.02559							356.41	-0.0642	354.842	-0.03895
366.385	-0.09864							356.502	-0.05758	354.935	-0.0291
366.478	-0.01982							356.595	-0.05522	355.028
366.57	-0.02018							356.687	-0.07479	355.12
366.663	-0.03305							356.78	-0.06125	355.213	-0.05789
366.756	0.00202							356.873	-0.05966	355.305	0.0118
366.848	0.03479							356.965		355.398	-0.07869
366.941	0.05576							357.058		355.491	-0.3107
367.034								357.151	-0.00443	355.583	-0.37163
367.126	-0.00365							357.243	-0.05821	355.676	-0.16886
367.219	0.03178							357.336	-0.04681	355.768	-0.06313
367.311	-0.01257							357.428	-0.05313	355.861	-0.06783
367.404	-0.07546							357.521	-0.03412	355.954	-0.0849
367.497	-0.44849							357.614	-0.00979	356.046
367.589	-0.07095							357.706	-0.02549	356.139	-0.03078
367.682	-0.08958							357.799	-0.02129	356.232	-0.07322
367.775	-0.09179							357.892	-0.05159	356.324	-0.01719
367.867	-0.00804							357.984		356.417	-0.08859
367.96								358.077		356.509	-0.07198
368.052								358.17	-0.02554	356.602	-0.06337
368.145	-0.02911							358.262	-0.00884	356.695	-0.06302
368.238	-0.03759							358.355	-0.04303	356.787	-0.08248
								358.448	-0.00764	356.88	-0.02802
								358.54	-0.02555	356.972
								358.633	-0.08865	357.065
								358.725	-0.01486	357.158	-0.06479
								358.818	-0.00565	357.25	-0.02334
								358.911	0.02389	357.343	-0.08293
								359.003		357.436	-0.06862
								359.096		357.528	-0.07661
								359.188	-0.04299	357.621	-0.0819
								359.281	-0.02543	357.714	-0.06053
								359.374	-0.04824	357.806	-0.03631
								359.466	-0.09997	357.899	-0.08342
								359.559	-0.06391	357.991
								359.651	0.06868	358.084
								359.744	-0.03184	358.177	-0.05682
								359.837	-0.03047	358.269	0.0415
								359.929	0.01548	358.362	-0.04014
								360.022		358.455	0.02718
								360.114		358.547	-0.0291
								360.207	-0.02589	358.64	-0.00591
								360.3	0.0127	358.732	-0.01725
								360.392	-0.05151	358.825	0.01724
								360.485	-0.1071	358.918	-0.00692
								360.577	-0.08663	359.01
								360.67	-0.09222	359.103
								360.763	-0.02339	359.195	-0.08626
								360.855	-0.00894	359.288	-0.02949
								360.948	0.03484	359.381	-0.06632
								361.041		359.473	-0.04005
								361.133	-0.01404	359.566	-0.115
								361.226	0.00143	359.659	-0.11309
								361.318	-0.03027	359.751	-0.000139845
								361.411	-0.00243	359.844	-0.0042
								361.504	0.02023	359.936	-0.01606
								361.596	0.08287	360.029
								361.689	-0.05109	360.122
								361.782	0.00903	360.214	0.00522
								361.874	-0.01853	360.307	0.0187
								361.967		360.399	-0.05131
								362.059		360.492	-0.05205
								362.152	-0.02136	360.585	0.00125
								362.245	-0.01787	360.677	-0.07744
								362.337	-0.02141	360.77	-0.01647
								362.43	0.01326	360.862	-0.03223
								362.522	-0.02405	360.955	-0.01361
								362.615	0.00022848	361.048
								362.708	0.00664	361.14	-0.05759
								362.8	-0.00676	361.233	0.01603
								362.893	0.02188	361.326	0.0132
								362.986		361.418	-0.01305
								363.078		361.511	-0.02066
								363.171	-0.06712	361.603	0.02436
								363.264	-0.00619	361.696	-0.00602
								363.356	-0.00819	361.789	-0.007
								363.449	-0.06695	361.881	0.000696051
								363.541	-0.02839	361.974
								363.634	-0.04783	362.066
								363.727	0.00352	362.159	0.02439
								363.819	0.0189	362.252	-0.02507
								363.912	-0.00389	362.344	-0.04223
								364.005		362.437	0.02149
								364.097		362.53	-0.0507
								364.19	-0.00136	362.622	-0.0216
								364.283	0.01716	362.715	0.000719825
								364.375	-0.11433	362.808	-0.01089
								364.468	-0.02806	362.9	-0.02076
								364.56	-0.10897	362.993
								364.653	-0.05768	363.086
								364.746	-0.01356	363.178	-0.06043
								364.838	0.02432	363.271	-0.04329
								364.931	-0.03902	363.363	-0.03046
								365.024		363.456	-0.05929
								365.116		363.548	-0.00711
								365.209	-0.04425	363.641	-0.05887
								365.302	-0.04829	363.734	-0.00426
								365.394	-0.02294	363.827	0.02429
								365.487	-0.08261	363.919	0.02326
								365.579	-0.08641	364.012
								365.672	-0.07427	364.104
								365.765	-0.03957	364.197	0.06281
								365.857	-0.02613	364.29	0.05333
								365.95	0.02243	364.382	-0.10087
								366.043		364.475	-0.05205
								366.135	-0.06044	364.568	-0.09415
								366.228	0.01554	364.66	-0.07497
								366.321	0.0295	364.753	0.07261
								366.413	0.01253	364.846	-0.00788
								366.506	-0.06793	364.938	-0.01925
								366.599	-0.04158	365.031
								366.691	-0.04534	365.123
								366.784	-0.02761	365.216	-0.02209
								366.877	-0.00973	365.309	-0.05418
								366.969		365.401	-0.02241
								367.062		365.494	-0.07539
								367.155	-0.02672	365.587	-0.0362
								367.247	-0.02315	365.679	0.008
								367.34	-0.01232	365.772	-0.0674
								367.433	-0.25007	365.865	-0.00315
								367.525	-0.33788	365.957	0.01203
								367.618	-0.08693	366.05
								367.71	-0.01039	366.143	0.00512
								367.803	0.0018	366.235	0.04769
								367.896	-0.01034	366.328	-0.00148
								367.988		366.421	-0.07356
								368.081		366.513	-0.04926
								368.174	1.47131e-05	366.606	-0.08551
								368.266	-0.01055	366.699	-0.0032
										366.791	0.01113
										366.884	-0.02134
										366.977
										367.069
										367.162	-0.02402
										367.254	0.00444
										367.347	-0.01363
										367.44	-0.12484
										367.532	-0.20531
										367.625	-0.10114
										367.718	0.01702
										367.81	-0.00223
										367.903	-0.02058
										367.995
										368.088
										368.181	0.04781
										368.273	0.03328

## Sheet: Acetone
DoY S1.1	Acetone S1.1	DoY S1.2	Acetone S1.2	DoY S1.3	Acetone S1.3	DoY S2.1	Acetone S2.1	DoY S2.2	Acetone S2.2	DoY S2.3	Acetone S2.3	DoY S3.1	Acetone S3.1	DoY S3.2	Acetone S3.2	DoY S3.3	Acetone S3.3	DoYS4.1	Acetone S4.1	DoY S4.2	Acetone S4.2	DoY S4.3	Acetone S4.3
	micromol/(m2 h)		micromol/(m2 h)		micromol/(m2 h)		micromol/(m2 h)		micromol/(m2 h)		micromol/(m2 h)		micromol/(m2 h)		micromol/(m2 h)		micromol/(m2 h)		micromol/(m2 h)		micromol/(m2 h)		micromol/(m2 h)
244.189	0.63463	244.197	0.13572	244.205	0.34247	244.212	0.57939	244.22	-0.23992	244.228	0.11467	244.236	-0.06734	244.244	-0.5109	244.154	0.52111	244.162	0.47475	244.17	-0.8976	244.178	0.90711
244.286	0.46427	244.294	-0.38326	244.302	-0.26604	244.31	0.11535	244.318	0.48999	244.326	-0.10252	244.333	0.71364	244.341	0.15346	244.251	0.80396	244.259	0.25921	244.267	-0.20689	244.275	0.39925
244.384	0.827	244.392	-0.34371	244.399	0.55165	244.407	0.61427	244.415	-0.29694	244.423	-0.22239	244.431	0.57697	244.439	-0.13474	244.349	0.54929	244.357	0.51102	244.365	-0.57703	244.372	-0.21534
244.481	0.79812	244.489	-0.43533	244.497	-0.79761	244.505	-0.19817	244.513	0.67238	244.52	-0.22112	244.528	-0.11754	244.536	0.42793	244.446	0.742	244.454	-0.24376	244.462	-0.34128	244.47	-0.15805
244.579	0.01803	244.587	0.02479	244.594	0.65661	244.602	-0.07498	244.61	0.11628	244.618	-1.01828	244.626	-2.08739	244.633	-0.08315	244.544	0.02242	244.552	-0.07858	244.56	0.21106	244.567	0.33574
244.676	0.0119	244.684	0.06144	244.692	-0.00244	244.7	0.00246	244.707	0.03774	244.715	0.00638	244.723	0.02801	244.731	0.00317	244.641	-0.02263	244.649	-0.001	244.657	0.06088	244.665	0.07889
244.774	0.00435	244.781	0.03141	244.789	0.0293	244.797	0.00652	244.805	0.01717	244.813	-0.01844	244.82	0.00827	244.828	0.06597	244.739	0.03065	244.747	0.00608	244.754	0.01964	244.762	0.02333
244.871	-0.01208	244.879	-0.06445	244.887	0.03389	244.894	0.0812	244.902	0.02163	244.91	0.01087	244.918	0.05041	244.926	0.05207	244.836	-0.01434	244.844	0.02935	244.852	0.06902	244.86	-0.01537
244.968		244.976		244.984		244.992		245		245.007		245.015		245.023		244.933	0.00332	244.941	-0.03205	244.949	0.03288	244.957	0.04073
245.066		245.073		245.081		245.089		245.097		245.105		245.113		245.12		245.031		245.039		245.046		245.054
245.163	-0.01048	245.171	0.01916	245.179	-0.02396	245.187	0.03891	245.194	0.02714	245.202	-0.01062	245.21	0.0392	245.218	0.01265	245.128	0.01992	245.136	0.00653	245.144	-0.00427	245.152	0.05073
245.26	-0.00311	245.268	0.04675	245.276	0.03415	245.6	0.15018	245.604	0.05911	245.608	0.01238	245.612	0.02171	245.616	0.28079	245.226	0.03644	245.233	0.0056	245.241	0.0336	245.249	0.0301
245.453	0.01788	245.592	0.08975	245.596	0.02306	245.711	1.23201	245.721	-0.79822	245.732	-0.0178	245.746	-0.53301	245.757	-0.57265	245.62	0.11503	245.624	-0.14464	245.628	-0.06917	245.5	0.04777
245.461	0.00202	245.689	-1.5341	245.7	-0.54727	245.716	-0.21523	245.727	0.43734	245.738	-0.2648	245.752	-0.27391	245.763	-0.16717	245.768	1.3866	245.779	-1.45538	245.79	-0.65067	245.508	-0.01568
245.469	0.1463	245.694	0.05321	245.705	0.22022	245.862	0.04707	245.869	0.0544	245.876	0.13014	245.883	0.04071	245.89	0.04713	245.774	-0.04362	245.784	-0.3505	245.795	-0.06936	245.516	0.04908
245.477	0.02573	245.848	0.03833	245.855	0.02927	245.951	0.01345	245.958	0.02239	245.965		245.972		245.979		245.898	0.10031	245.905	0.00852	245.912	0.08396	245.524	-0.06091
245.485	0.05116	245.937	0.000441965	245.944	0.01653	246.04		246.047		246.054		246.061		246.069		245.987		245.994		246.001		245.538	-0.22538
245.492	-0.01873	246.026		246.033		246.129	0.03872	246.136	0.08099	246.143	0.05086	246.151	0.042	246.158	0.0691	246.076		246.083		246.09		245.546	0.05433
245.588	-0.01197	246.115		246.122		246.218	0.03155	246.225	-0.00174	246.233	0.02797	246.24	0.0561	246.247	0.02288	246.165	0.05652	246.172	0.02941	246.179	0.08963	245.554	0.02751
245.678	0.73093	246.204	0.02776	246.211	0.04611	246.308	0.01824	246.315	0.00922	246.322	0.02289	246.329	0.00167	246.336	0.00248	246.254	0.03764	246.261	0.01685	246.268	-0.000653157	245.563	0.04256
245.684	-0.24302	246.293	0.05658	246.3	0.04045	246.397	0.00889	246.404	0.02932	246.411	0.08091	246.418	0.04841	246.425	0.06156	246.343	0.02132	246.35	-0.00385	246.357	0.01051	245.568	0.04279
245.841	-0.48654	246.382	0.03367	246.39	-0.0137	246.486	0.01375	246.493	-0.000540709	246.5	0.04245	246.507	0.03831	246.514	-0.02037	246.432	0.02456	246.439	-0.01908	246.447	-0.00464	245.574	-0.15015
245.93	-0.01482	246.472	-0.01206	246.479	-0.02443	246.575	0.00587	246.582	0.0763	246.589	0.07235	246.596	0.08695	246.603	0.07658	246.521	0.01946	246.529	0.00953	246.536	-0.00181	245.578	0.0376
246.019		246.561	-0.00243	246.568	0.00455	246.664	0.01122	246.671	0.04046	246.702	0.02026	246.709	0.07785	246.716	0.1041	246.611	-0.01798	246.618	0.03735	246.625	0.03901	245.582	0.42977
246.108		246.65	0.02343	246.657	-0.01011	246.859	0.08229	246.866	0.09989	246.873	0.14995	246.884	0.09688	246.891	0.06869	246.723	-0.06389	246.731	0.10027	246.738	0.11852	245.632	0.03234
246.197	0.03265	246.815	-1.51494	246.848	0.07535	246.962		246.969		246.976		246.987		246.994		246.898	0.08722	246.909	0.00797	246.916	0.06442	245.8	0.08458
246.286	0.06484	246.822	-0.03853	246.951	0.0731	247.065		247.072		247.079		247.09		247.097		247.001		247.012		247.019		245.806	0.03107
246.375	0.03401	246.841	0.00405	247.055		247.168	0.08152	247.176	0.1231	247.183	0.08278	247.193	0.06483	247.2	0.02806	247.104		247.115		247.122		245.919	0.00278
246.464	-0.01739	246.944	0.02395	247.158	0.03241	247.272	-0.08209	247.279	0.0264	247.286	0.15548	247.296	0.07722	247.304	0.08776	247.208	0.04377	247.218	-0.02586	247.225	0.06282	246.008
246.554	-0.01205	247.048		247.261	0.0889	247.602	0.02543	247.61	0.000184127	247.617	0.0176	247.627	0.02744	247.634	0.01276	247.311	0.04691	247.321	0.05496	247.329	0.01792	246.097
246.643	0.00312	247.151	-0.26093	247.364	0.01315	247.706	0.00754	247.713	0.10552	247.72	0.06617	247.731	0.04606	247.738	0.06355	247.642	-0.0173	247.652	-0.01597	247.659	0.05421	246.186	0.0278
246.756	0.13589	247.254	0.04532	247.592	0.0042	247.809	-0.01864	247.816	-3.93817	247.823	0.01703	247.834	0.0597	247.841	0.08614	247.745	0.13507	247.755	0.02797	247.763	0.06466	246.275	0.04694
246.801	0.07054	247.357	0.02082	247.695	0.01133	247.912	0.09742	247.919	-0.02078	247.926	0.00753	247.937	0.06702	247.944	0.04873	247.848	-0.0083	247.859	0.06879	247.866	0.06347	246.365	0.09016
246.808	0.00424	247.585	-0.01247	247.798	-0.00308	248.015		248.022		248.029		248.04		248.047		247.951	0.07052	247.962		247.969		246.454	0.08756
246.834	-0.06309	247.688	0.04426	247.901	-0.03987	248.118		248.125	0.00918	248.132	0.01314	248.143	0.03452	248.15	0.04059	248.054		248.065		248.072		246.543	0.00399
246.937	0.04703	247.791	-0.48354	248.004		248.221	0.09491	248.229	0.55779	248.236	0.09149	248.246	-0.03151	248.253	1.09758	248.157	0.05451	248.168	0.03906	248.175	0.01832	246.632	0.04559
247.04		247.894	-0.02052	248.108		248.325	-0.0439	248.332	-0.00707	248.339	0.03304	248.35	0.00521	248.357	-0.00297	248.261	1.3989	248.271	0.20821	248.278	-0.03947	246.745	0.06164
247.144	-0.10791	247.997		248.211	0.04329	248.428		248.435		248.442		267.796	-0.03645	267.803	-0.01303	248.364	0.00972	248.374	0.00801	248.382	0.03367	246.923	0.09088
247.247	0.03916	248.1		248.314	-0.00158	275.796	-0.0179	248.878	0.0334	248.885	1.46222	267.888	-0.04719	267.895	0.00104	267.81	0.02378	267.817	-0.01576	267.824	0.03191	247.026
247.35	-0.02979	248.204	-0.05139	248.417		275.889	0.04282	248.895	0.00919	248.902	0.06938	267.981		267.988		267.903	0.00269	267.91	0.04993	267.917	-0.02429	247.129	0.17102
247.577	-0.00789	248.307	0.00317	267.767	-0.09908	275.981		248.913	-0.04866	248.92	0.0632	268.073		268.081		267.995		268.002		268.009		247.233	0.02165
247.681	0.00487	248.41	-0.0076	267.86	-0.01856	276.074		248.931	0.00902	248.938	0.01545	268.166	0.02356	268.173	0.00781	268.088		268.095		268.102		247.336	0.09196
247.784	-0.00148	267.76	0.06427	267.952	-0.08189	276.167		248.949	0.04778	248.956	0.17331	268.259	-0.00965	268.266	-0.0232	268.18	-0.00585	268.187	-0.000673055	268.195	0.01557	247.667	0.07483
247.887	-0.04084	267.853	0.04228	268.045		276.259		248.966		248.974		268.351	-0.01271	268.358	-0.00953	268.273	0.00218	268.28	-0.00552	268.287	-0.02933	247.77	0.07139
247.99		267.945	0.0365	268.138	-0.01317	276.352		248.984		248.991		268.492	0.00962	268.499	0.00247	268.365	-0.02526	268.372	-0.00942	268.38	0.000373415	247.873	0.02051
248.093		268.038		268.23	-0.000743867	276.444		249.002		249.009		268.587	-0.01823	268.594	0.03931	268.506	-0.01632	268.513	0.02079	268.521	0.03444	247.976
248.196	0.05028	268.13	0.02917	268.323	-0.02135	276.537		249.02		249.027		268.68	-0.01377	268.687	0.1332	268.602	-0.01021	268.609	-0.00243	268.616	0.00511	248.079
248.3	0.02665	268.223	0.06213	268.415	0.00615	276.63		249.037		249.045		268.773	0.02643	268.78	0.01147	268.694	-0.01332	268.701	0.01588	268.708	0.02129	248.182	0.07708
248.403	-0.01189	268.315	0.04086	268.463	0.01655	276.722		249.055		249.062		268.865	-0.00347	268.872	0.04205	268.787	-0.01351	268.794	-0.00145	268.801	0.0123	248.286	0.05205
266.605	-0.08032	268.408	-0.0047	268.559	0.01047	276.815		249.073		249.08		268.958	-0.01102	268.965		268.879	-0.0031	268.887	0.01542	268.894	-0.00945	248.389	0.03101
266.622	-0.0361	268.456	0.0193	268.651	-0.04287	276.903		249.091		249.098		269.05		269.057		268.972		268.979		268.986		267.831	0.03775
266.64	-0.06475	268.552	0.07064	268.744	0.0397	276.996		249.108		249.116		269.143	-0.03321	269.15	0.02112	269.065		269.072		269.079		267.924	0.02621
267.753	-0.21737	268.644	0.06894	268.837	-0.04644	277.088		249.126	0.04116	249.133	0.10282	269.235	-0.0238	269.243	0.00656	269.157	0.01692	269.164	0.02807	269.171	0.0223	268.016
267.845	-0.1151	268.737	0.000425003	268.929	-0.00427	277.181	0.00594	249.144	0.07121	249.151	0.09849	269.328	0.01711	269.335	-0.01245	269.25	0.00689	269.257	0.00601	269.264	-0.00832	268.109
267.938	-0.1382	268.829	0.06861	269.022		277.274		249.162	0.00583	249.169	0.05356	269.421	-0.09003	269.428	-0.01969	269.342	0.01705	269.349	-0.00955	269.356	0.01825	268.202	-0.02622
268.031		268.922	0.02869	269.114		277.366		249.18	0.02919	249.187	-0.03689	269.513	-0.04739	269.52	0.26566	269.435	-0.02615	269.442	-0.0678	269.449	-0.00551	268.294	0.03389
268.123		269.015		269.207	0.02613	277.506	-0.00209	249.197	0.01832	249.204	0.05657	269.606	-0.05732	269.613	-0.00272	269.527	0.66679	269.534	-0.03217	269.542	-0.04983	268.387	0.00892
268.216	-0.07019	269.107		269.299	0.02847	277.599	-0.00939	249.215	0.01799	249.222	0.02113	269.698	0.00744	269.705	0.00158	269.62	-0.02577	269.627	-0.08124	269.634	-0.05497	268.528	0.01825
268.308	-0.11374	269.2	0.05182	269.392	0.04475	277.691	0.02827	249.233	-0.00643	249.24	-0.01404	269.81	0.000681505	269.817	0.02902	269.713	-0.01766	269.72	-0.03108	269.727	0.0535	268.623	0.0308
268.401	-0.05226	269.292	0.04549	269.485	0.01127	277.784	-0.07692	249.251	0.01607	249.258	0.03117	269.903	0.00326	269.91	-0.00907	269.824	-0.02134	269.832	0.05872	269.839	0.29443	268.716	0.0596
268.449	-0.03215	269.385	0.01692	269.577	-0.03454	277.877	-0.02393	249.268	0.01436	249.276	0.0392	269.995		270.002		269.917	-0.00822	269.924	0.11991	269.931	0.3183	268.808	0.02003
268.544	-0.03304	269.477	0.04223	269.67	-0.00869	277.969		249.286	0.03428	249.293	0.000578923	270.088		270.095		270.01		270.017		270.024		268.901	0.02001
268.637	-0.117	269.57	0.01767	269.782	-0.06136	278.061		249.304	0.01034	249.311	-0.01552	270.18	-0.04324	270.188	0.0501	270.102		270.109		270.116		268.993
268.73	-0.03659	269.663	-0.06249	269.874	-0.02271	278.154	-6.24945e-06	249.34	0.03362	249.347	0.02384	270.273	0.02653	270.28	0.03076	270.195	0.01438	270.202	0.01917	270.209	0.16627	269.086
268.822	-0.14394	269.775	0.08059	269.967		278.246	-0.0069	249.354	0.01909	249.361	0.02589	270.365	0.00128	270.373	0.03865	270.287	-0.02293	270.294	0.01361	270.301	0.17469	269.178	0.04161
268.915	-0.14097	269.867	0.07108	270.059		278.34	-0.00214	249.368	0.0568	249.375	0.04337	270.458	0.00115	270.465	0.04172	270.38	-0.00586	270.387	0.03112	270.394	0.15039	269.271	0.00914
269.008		269.96		270.152	-0.03664	278.432	-0.01944	249.386	0.01924	249.407	0.03614	270.551	-0.05379	270.558	0.12916	270.472	-0.01737	270.479	-0.0084	270.487	0.22126	269.364	-0.01532
269.1		270.052		270.244	-0.05528	278.524	-0.05058	249.4	0.00488	249.422	0.0658	270.643	0.05112	270.65	0.0818	270.565	-0.01466	270.572	0.04331	270.579	0.35129	269.456	0.01897
269.193	-0.0604	270.145	0.05877	270.337	1.70773e-05	278.617	-0.04037	249.415	0.02124	249.439	0.02404	270.736	0.0158	270.743	0.07762	270.658	-0.05796	270.665	0.0347	270.672	0.34722	269.549	-0.02721
269.285	-0.02641	270.237	0.05394	270.429	-0.01403	278.709	-0.00258	249.432	0.0156	249.454	0.02964	271.432	-0.00712	271.439	0.01238	270.75	-0.05459	271.453	0.00692	271.46	0.37524	269.641	0.09548
269.378	-0.06967	270.33	0.06571	270.522	-0.09899	278.817	-0.06673	249.447	-0.04073	249.468	0.03913	271.525	-0.05234	271.532	-0.01867	271.446	-0.05071	271.546	0.0034	271.553	0.50868	269.734	0.00643
269.47	-0.1734	270.422	0.05862	270.615	-0.24419	278.91	0.01508	249.461	-0.01017	249.486	0.09331	271.617	-0.01398	271.624	0.00527	271.539	-0.1203	271.638	0.00382	271.646	0.51689	269.846	-0.03075
269.563	-0.18651	270.515	0.09503	270.707	-0.02542	279.002		249.479	-0.0399	249.5	0.06673	271.71	-0.02104	271.717	0.03815	271.631	0.00818	271.731	0.08181	271.738	0.46262	269.938	-0.02495
269.656	-0.12406	270.608	0.08413	271.403	0.01646	279.095		249.493	0.04026	249.514	0.000161197	271.802	-0.00787	271.809	0.02666	271.724	-0.00154	271.823	0.00424	271.831	0.38972	270.031
269.748	-0.08409	270.7	0.0829	271.496	-0.12864	279.187		249.507	-0.06203	249.532	0.06905	271.895	0.02555	271.902	0.03486	271.816	-0.01401	271.916	0.04456	271.923	0.37804	270.124
269.767	-0.02538	271.396	0.11172	271.589	-0.04116	279.28		249.525	-0.02655	249.546	0.04309	271.987		271.994		271.909	0.03009	272.009		272.016		270.216	-0.00672
269.86	0.04025	271.489	0.05923	271.681	-0.04948	279.356		249.539	0.01303	249.561	0.00646	272.08		272.087		272.001		272.101		272.108		270.309	-0.00182
269.952	0.09047	271.581	0.02991	271.774	-0.18352	279.415	-0.01358	249.553	0.02906	249.578	0.06145	272.172	-0.00327	272.179	0.04511	272.094		272.194	0.04733	272.201	0.22855	270.401	0.00856
270.045		271.674	0.04954	271.866	-0.07218	279.465	-0.01959	249.571	0.000788633	249.593	0.03284	272.265	-0.00646	272.272	0.03244	272.187	-0.00553	272.286	0.052	272.293	0.24947	270.494	-0.01713
270.138	0.15627	271.766	0.05566	271.959		279.516	-0.02162	249.585	-0.05204	249.607	0.03139	272.357	-0.00126	272.365	0.00229	272.279	0.01443	272.379	0.00455	272.386	0.26359	270.586	-0.01043
270.23	0.24298	271.859	-0.00126	272.051		279.585	-0.01249	249.6	0.00146	249.625	0.04524	272.45	-0.00554	272.457	0.00578	272.372	-0.00116	272.471	0.01264	272.479	0.35532	270.679	-0.04376
270.323	0.32567	271.952	0.05208	272.144	-0.01905	279.668	-0.03547	249.618	0.05856	249.639	0.06726	272.543	0.01204	272.55	0.03102	272.464	-0.05042	272.564	-0.00609	272.571	0.48862	271.468	-0.04598
270.415	0.18143	272.044		272.236	-0.02116	279.716	0.01182	249.632	0.06868	249.653	0.01933	272.635	0.01073	272.642	0.06014	272.557	-0.02511	272.656	0.06751	272.664	0.49456	271.56	0.00373
270.508	0.21359	272.137	0.04646	272.329	0.01753	279.765	-0.015	249.646	0.04071	249.671	0.04656	272.728	0.04688	272.735	0.04638	272.649	0.00112	272.749	0.01399	272.756	0.3186	271.653	0.0376
270.6	0.2001	272.229	0.02655	272.421	-0.06388	279.813	-0.02928	249.664	-0.00911	249.685	0.00589	272.82	-0.03549	272.827	0.02881	272.742	0.05415	272.841	-0.02764	272.849	0.35369	271.745	-0.01714
270.693	0.17365	272.322	0.08169	272.514	-0.09114	279.862	-0.04895	249.678	0.03016	249.7	0.00218	272.913	-0.00418	272.92	0.02692	272.834	-0.00252	272.934	0.03843	272.941	0.35643	271.838	-0.00438
271.389	0.20602	272.414	0.06912	272.607	-0.04384	279.888	-0.0079	249.692	0.07992	249.717	0.02021	273.005		273.012		272.927	-0.00152	273.027		273.034		271.93	-0.00712
271.482	0.19422	272.507	0.04612	272.699	-0.02849	279.981		249.71	-0.02604	249.732	0.04972	273.098		273.105		273.02		273.119		273.126	0.1478	272.023
271.574	0.18892	272.599	0.04391	272.792	-0.19173	280.073		249.725	0.04724	249.746	0.04665	273.19	0.05694	273.197	0.02889	273.112		273.212	0.07989	273.219	0.11723	272.115
271.667	0.21483	272.692	0.06353	272.884	-0.05744	280.166	-0.00914	249.739	0.06579	249.764	0.03099	273.283	0.02481	273.29	0.00995	273.205	0.02541	273.304	0.03366	273.311	0.14603	272.208	0.03319
271.759	-0.07807	272.784	0.09756	272.977		280.258	0.01222	249.757	-0.01778	249.778	0.05903	273.375	0.03722	273.382	0.03726	273.297	-0.00286	273.397	-0.02159	273.404	0.11382	272.301	-0.02406
271.852	0.14879	272.877	0.03088	273.069		280.347	0.00127	249.771	0.08255	249.792	0.05534	273.468	0.05586	273.475	0.04144	273.389	-0.02938	273.489	0.01337	273.496	0.154	272.393	0.02096
271.944	0.25832	272.97		273.162	0.00638	280.392	-0.05009	249.785	0.06565	249.81	0.06145	273.56	-0.00999	273.568	0.1364	273.482	-0.02461	273.582	0.02442	273.589	0.25311	272.486	0.01406
272.037		273.062		273.254	-0.00504	280.437	-0.06763	249.803	0.03101	249.824	0.12748	273.652	-0.07038	273.659	-0.02234	273.575	-0.00414	273.673	-0.03181	273.68	-0.00581	272.578	-0.00777
272.129	0.22246	273.155	0.10361	273.347	-0.04086	280.482	-0.03437	249.817	0.02841	249.839	0.05492	273.744	-0.06961	273.751	-0.00334	273.666	0.00438	273.766	-0.0161	273.773	-0.02788	272.671	0.02947
272.222	0.21975	273.247	0.04386	273.439	-0.03252	280.538	-0.02321	249.831	0.0591	249.856	0.08834	273.837	0.00179	273.844	0.01411	273.759	-0.02297	273.858	-0.01263	273.865	-0.01078	272.763	0.0216
272.315	0.24044	273.34	0.05886	273.532	-0.07058	280.63	-0.0215	249.849	-0.01216	249.871	0.05379	273.93	-0.01612	273.937	0.02104	273.851	0.00698	273.951	-0.00211	273.958	0.00381	272.856	-0.0475
272.407	0.31325	273.432	0.0727	273.623	-0.05101	280.723	-0.01354	249.863	0.02934	249.885	0.08365	274.022		274.029		273.944	-0.02251	274.043		274.051		272.948	-0.00963
272.5	0.2305	273.525	0.05407	273.716	-0.03301	280.835	-0.05419	249.878	0.00246	249.903	0.08618	274.115		274.122		274.036		274.136	0.01817	274.143	-0.000826923	273.041
272.592	0.28628	273.616	-0.04437	273.808	-0.0872	280.927	-0.02117	249.895	0.06521	249.917	0.33264	274.207	0.00247	274.214	0.01935	274.129	0.00899	274.229	-0.02371	274.236	0.00535	273.133	0.01214
272.685	0.26477	273.709	0.02354	273.901	-0.0379	281.02		249.91	0.06038	249.931	0.06697	274.3	-0.03694	274.307	-0.00408	274.221	-0.00152	274.321	0.000890023	274.328	-0.01332	273.226	0.00108
272.777	0.14249	273.801	0.0741	273.994		281.113		249.924	0.08635	249.949	0.06057	274.392	-0.05532	274.4	0.000574233	274.314	0.00981	274.485	-0.03542	274.492	-0.01125	273.318	-0.00963
272.87	0.26233	273.894	-0.0212	274.086		281.205	-0.00961	249.942	0.07974	249.963		274.463	-0.04448	274.47	0.04453	274.407	0.00192	274.577	-0.05352	274.584	-0.033	273.411	0.01768
272.963		273.986		274.179	-0.04739	281.297		249.956	0.01233	249.977		274.556	-0.12469	274.563	-0.03847	274.478	-0.02315	274.67		274.677		273.503	0.0126
273.055		274.079		274.271	-0.05734	281.392	-0.07568	249.97		249.995		274.648	-0.02777	274.656		274.57	-0.04411	275.839	-0.06208	275.846	-0.05285	273.596	0.01112
273.148	0.0882	274.172	0.0169	274.364	-0.02069	281.485	-0.06408	249.988		250.009		275.818	-0.02324	274.812	0.01433	274.663		275.932	0.01388	275.939	0.01119	273.687	0.01322
273.24	0.17711	274.264	-0.06265	274.435	-0.0265	281.581	-0.00948	250.002		250.023		275.91	-0.0057	274.954	0.00696	274.835	0.0121	276.024		276.031		273.78	0.03509
273.332	0.16248	274.357	-0.03488	274.527	-0.1977	281.676	-0.08353	250.016		250.041		276.003		275.096		274.976		276.117		276.124		273.873	0.01958
273.425	0.10573	274.428	-0.01485	274.62	-0.05899	281.825	-0.03709	250.034		250.055		276.095		275.237	0.00898	275.118		276.209		276.216		273.965
273.518	0.15088	274.52	-0.03047	274.713	-0.0178	281.917	0.01038	250.048		250.07		276.188		275.379	0.01662	275.26	0.00852	276.302		276.309		274.058
273.609	-0.08967	274.613	-0.000140318	275.789	-0.04457	282.01		250.063		250.087		276.281		275.521	0.01006	275.402	0.00371	276.395		276.402		274.15	0.00775
273.702	-0.08022	274.706	0.00278	275.882	-0.06756	282.102		250.08		250.102		276.373		275.662	0.0122	275.543	0.00546	276.487		276.494		274.243	0.00773
273.794	-0.37822	275.782	0.03131	275.974		282.195	-0.01271	250.095		250.116		276.466		275.825	0.02243	275.685	0.0071	276.58		276.587		274.336	-0.01913
273.887	-0.15081	275.875	0.02112	276.067		282.336	-0.0167	250.109		250.134	0.12862	276.558		275.917	-0.01983	275.832	-0.02943	276.672		276.679		274.499	0.02566
273.979		275.967		276.159		282.428	-0.05686	250.127	0.0274	250.148	0.02436	276.651		276.01		275.924	0.00409	276.765		276.772		274.592	-0.01896
274.072		276.06		276.252		282.521	-0.06479	250.141	0.03852	250.162	-0.00481	276.743		276.103		276.017		276.857		276.864		274.684
274.164	-0.10385	276.152		276.345		282.613	-0.03618	250.155	0.01556	250.18	0.03589	276.836		276.195		276.11		276.946		276.953		274.857	0.01337
274.257	-0.10188	276.245		276.437		282.712	-0.02474	250.173	0.05971	250.194	0.10929	276.925		276.288		276.202		277.039		277.046		274.999
274.35	-0.26037	276.337		276.53		282.804	0.01166	250.187	0.06234	250.209	0.06935	277.017		276.38		276.295		277.131	-0.01606	277.138	-0.01503	275.141	0.00995
274.421	-0.14287	276.43		276.622		282.897	0.00121	250.201	0.05118	250.226	0.05181	277.11		276.473		276.387		277.224	-0.00456	277.231	-0.01699	275.282	0.00865
274.513	-0.38818	276.523		276.715		282.989		250.219	-0.03341	250.241	0.04957	277.202	-0.00332	276.565		276.48		277.316		277.323		275.424	0.00333
274.606	-0.11212	276.615		276.807		283.082		250.233	0.02674	250.255	0.03023	277.295		276.658		276.573		277.409	-0.08168	277.426	-0.05756	275.566	0.00373
274.698	-0.1103	276.708		276.896		283.174	-0.0381	250.248	0.00636	250.273	0.02475	277.387		276.751		276.665		277.549	-0.06339	277.556	-0.07562	275.707	0.00557
274.745	0.01426	276.8		276.989		283.267	-0.01347	250.265	-0.01593	250.287	0.00943	277.528	-0.00955	276.843		276.758		277.642	-0.03493	277.649	-0.01378	275.853	-0.01113
274.887	0.0107	276.889		277.081		283.359	0.02234	250.28	0.0473	250.301	0.03103	277.62	-0.0507	276.932		276.85		277.734	-0.01186	277.741	-0.01245	275.946	0.0191
275.028		276.982		277.174	-0.06742	283.452	-0.02417	250.294	0.04371	250.319	0.07039	277.713	-0.04331	277.024		276.939		277.827	-0.06607	277.834	-0.07765	276.039
275.17	0.00524	277.074		277.266	-0.13656	283.544	-0.02461	250.312	-0.0189	250.333	0.0646	277.805	-0.01315	277.117		277.031		277.919	-0.01141	277.926	-0.00342	276.131
275.312	0.00965	277.167	-0.02782	277.359		283.637	-0.04221	250.326	0.00337	250.347	0.03542	277.898	-0.02922	277.209	-0.01948	277.124		278.012		278.019		276.224
275.454	0.00535	277.259	0.02728	277.492	-0.15714	283.73	-0.00137	250.34	0.04439	250.365	0.02791	277.99		277.302	0.07921	277.217	-0.06356	278.104		278.111		276.316
275.595	0.00672	277.352		277.592	-0.06539	283.822	-0.02853	250.358	0.0078	250.379	0.00138	278.083		277.395	-0.17783	277.309		278.197	-0.02157	278.204	-0.00692	276.409
275.737	0.01668	277.485	0.04792	277.684	-0.04883	283.915	-0.02695	250.372	0.03602	250.394	0.03703	278.175	-0.02504	277.535	-0.02459	277.402	-0.08231	278.289	-0.01272	278.296	-0.015	276.501
275.775	-0.16067	277.585	-0.05291	277.777	-0.21815	284.007		250.387	0.04999	250.412	0.06901	278.268	-0.00158	277.627	0.0065	277.542	-0.03813	278.382	-0.01141	278.389	0.00344	276.594
275.867	-0.11517	277.677	0.01319	277.869	-0.1082	284.1		250.404	0.04322	250.426	0.02835	278.361	-0.00524	277.72	-0.01707	277.635	-0.04046	278.475	-0.02055	278.482	-0.00691	276.687
275.96		277.77	-0.05833	277.962		284.192	-0.02231	250.419	0.02164	250.44	0.04457	278.453	-0.03243	277.813	-0.03993	277.727	-0.00461	278.567	-0.03044	278.574	-0.02727	276.779
276.053		277.862	0.000384959	278.054		284.285	-0.02099	250.433	-0.01836	250.458	0.03654	278.546	-0.0082	277.905	0.01116	277.82	-0.03685	278.66	-0.01944	278.667	0.000559559	276.872
276.145		277.955	-0.000894865	278.147	-0.0333	284.377	-0.08712	250.451	0.01938	250.472	-0.01073	278.638	-0.02929	277.997		277.912	-0.02605	278.752	-0.00112	278.759	-0.000932766	276.96
276.238		278.047		278.239	-0.03284	284.469	-0.05392	250.465	0.02035	250.486	0.05245	278.731	0.00304	278.09		278.005		278.86	-0.01788	278.867	-0.000631386	277.053
276.33		278.14	0.00455	278.332	-0.01248	284.562	-0.05147	250.479	0.0282	250.504	0.04956	278.839	-0.0455	278.182	-0.01339	278.097		278.953	-0.01856	278.96		277.145	0.01245
276.423		278.232	-0.01659	278.425	-0.03576	284.655	-0.04431	250.497	0.03623	250.518	0.00719	278.931	-0.01323	278.275	-0.00414	278.19	-0.03457	279.045		279.052		277.238	0.03075
276.516		278.325	0.02311	278.517	-0.07137	284.747	-0.02018	250.511	0.01432	250.533	0.04956	279.024		278.368	0.01071	278.282	-0.02022	279.138		279.145		277.331
276.608		278.418	0.00927	278.61	-0.06801	284.84	-0.01502	250.525	0.00603	250.55	-0.00804	279.116		278.46	0.01079	278.375	-0.00378	279.23		279.237		277.433	0.041
276.701		278.51	-0.01455	278.702	-0.02506	284.932	-0.01513	250.543	0.03894	250.565	0.00138	279.209		278.553	0.0028	278.468	-0.03388	279.323		279.33		277.563	-0.01034
276.793		278.603	-0.03761	278.81	-0.05534	285.025		250.558	0.06641	250.579	0.00539	279.301		278.645	-0.00399	278.56	-0.02282	279.376		279.379		277.656	-0.01186
276.882		278.695	0.02287	278.903	-0.04035	285.142	-0.03156	250.572	0.16872	250.597	0.0646	279.366		278.738	0.01351	278.652	-0.03981	279.436	-0.02872	279.439	-0.01698	277.749	-0.00723
276.974		278.803	-0.02016	278.995		285.235	0.00143	250.59	0.01528	250.611	0.06257	279.425	0.01142	278.846	-0.01881	278.745	-0.00671	279.487	-0.03365	279.49	-0.01063	277.841	-0.03996
277.067		278.896	-0.02382	279.088		285.327	-0.03987	250.604	0.0897	250.625	0.04218	279.476	-0.03323	278.938	0.01079	278.853	-0.02739	279.537	-0.01028	279.541	-0.03832	277.933	-0.02517
277.16	-0.17815	278.988		279.18		285.42	-0.04528	250.618	0.04831	250.643	0.01239	279.526	-0.06901	279.031		278.945	-0.03161	279.628	-0.03324	279.635	-0.01415	278.026
277.252	-0.21722	279.081		279.273		285.512	-0.02	250.636	-0.50402	250.657	0.03909	279.606	-0.03423	279.123		279.038		279.687	-0.02143	279.691	-0.0093	278.118
277.345		279.173		279.353		285.605	-0.05288	250.65	-0.36624	250.672	0.03431	279.678	-0.01426	279.216		279.13		279.736	-0.04991	279.739	0.00405	278.211	0.000713938
277.478	-0.187	279.266		279.408		285.697	-0.01933	250.664	0.07306	250.689	0.05009	279.726	-0.00426	279.308		279.223		279.784	-0.00229	279.788	-0.01489	278.397	0.02096
277.578	-0.17127	279.35		279.461	-0.06966	285.79	-0.03333	250.682	0.11995	250.704	0.07476	279.774	-0.0316	279.369		279.316		279.833	0.0058	279.836	-0.03932	278.489	0.01009
277.67	-0.14053	279.406		279.512	-0.06094	285.882	-0.0161	250.696	0.09595	250.718	-0.70784	279.823	-0.06955	279.428	0.02761	279.373		279.931	-0.00452	279.938	-0.02742	278.581	-0.00248
277.763	-0.3767	279.458	-0.02685	279.559	-0.0255	285.975		250.711	-0.07423	250.736	0.01216	279.909	-0.03225	279.479	0.0208	279.433	-0.01074	280.024		280.031		278.674	-0.01522
277.855	-0.31978	279.508	-0.03396	279.578	-0.04233	286.067		250.729	0.02517	250.75	0.04791	280.002		279.53	-0.02946	279.484	-0.02196	280.116		280.123		278.766	0.01827
277.948	-0.20871	279.555	-0.04431	279.664	-0.04759	286.16	-0.02656	250.743	0.02928	250.764	0.04867	280.095		279.613	-0.00278	279.534	0.00383	280.209	0.01628	280.216	0.00592	278.874	-0.00411
278.04		279.571	-0.0343	279.713	-0.02361	286.252	-0.04085	250.757	0.00935	250.782	0.13454	280.187	0.02029	279.681	-0.02624	279.621	-0.02521	280.301	0.00414	280.308	0.00851	278.967
278.133	-0.10685	279.661	-0.01121	279.761	-0.03904	286.345	-0.01828	250.775	0.08008	250.796	0.07704	280.28	0.03045	279.729	0.000797709	279.684	-0.01358	280.367	0.00615	280.37	-0.0036	279.059
278.225	-0.09399	279.709	-0.01704	279.81	-0.07997	286.437	-0.04943	250.789	0.01685	250.811	0.05039	280.357	0.01507	279.778	-0.00282	279.732	0.00276	280.411	-0.03237	280.415	-0.04659	279.152
278.318	-0.07947	279.758	-0.02997	279.858	-0.04394	286.53	-0.03917	250.803	0.01851	250.828	0.11212	280.401	0.0088	279.826	-0.01187	279.781	-0.0359	280.457	-0.04361	280.46	-0.06507	279.244
278.411	-0.1051	279.807	0.000793178	279.881	-0.03754	286.622	-0.02331	250.821	0.02656	250.843	0.01209	280.447	-0.03772	279.917	0.02163	279.83	-0.04423	280.502	-0.06132	280.505	-0.07917	279.337
278.503	-0.12723	279.855	0.00862	279.974		286.715	-0.04202	250.835	0.10073	250.857	0.06257	280.492	-0.01635	280.009		279.924	-0.05876	280.581	-0.07887	280.588	-0.10455	279.382
278.596	-0.09223	279.874	-0.00815	280.066		286.807	-0.01235	250.85	0.04477	250.875	0.06127	280.559	-0.01249	280.102		280.016		280.673	-0.03039	280.68	-0.0179	279.443	0.01029
278.688	-0.10693	279.966		280.159	-0.00648	286.9	-0.01496	250.867	-0.01283	250.889	0.08796	280.652	-0.01237	280.194	0.02469	280.109		280.789	-0.02008	280.797	-0.03972	279.494	-0.00722
278.796	-0.20142	280.059		280.251	0.00347	286.992		250.882	0.11238	250.903	0.09374	280.768	0.01569	280.287	0.02229	280.201	-0.02442	280.878	-0.01512	280.885	-0.02236	279.545	-0.000669594
278.888	-0.17054	280.152	0.00599	280.344	-0.02138	287.085		250.896	0.04466	250.921	0.03746	280.856	0.01149	280.36	0.00534	280.294	-0.01553	280.97		280.977		279.642	0.03296
278.981		280.244	-0.00437	280.388	-0.01846	287.177	-0.03433	250.914	0.18423	250.935	0.02931	280.949	0.03101	280.405	-0.01566	280.363	-0.01811	281.063		281.07		279.694	-0.01338
279.074		280.34	0.02474	280.433	-0.08864	287.27	-0.03928	250.928	-1.77679	250.949	0.11467	281.041		280.45	-0.02914	280.408	-0.01725	281.155	-0.01048	281.162	0.00062035	279.742	-0.02146
279.166		280.385	-0.00138	280.479	-0.11234	287.362	-0.22229	250.942	0.0559	250.967		281.134	-0.00876	280.495	-0.03498	280.453	-0.08038	281.248	0.03775	281.255	0.01301	279.791	-0.0029
279.259		280.43	-0.05489	280.531	-0.07097	287.455	-0.14162	250.96		250.981		281.226	-0.04738	280.566	-0.04291	280.498	-0.06963	281.343	-0.05845	281.35	-0.0891	279.839	-0.00619
279.346		280.475	-0.05987	280.623	-0.04597	287.547	-0.16773	250.974		250.996		281.321	-0.04805	280.659	-0.00412	280.574	-0.07627	281.435	-0.0412	281.442	-0.05347	279.945	-0.0114
279.402		280.524	-0.06882	280.716	-0.00864	287.64	-0.03378	250.989		251.014		281.414	-0.04225	280.775	0.00671	280.666	-0.00747	281.532	-0.03851	281.539	-0.05919	280.038
279.454	-0.11579	280.616	-0.08469	280.828	-0.0086	287.732	-0.05287	251.006		251.028		281.51	-0.05957	280.863	0.04704	280.782	-0.04009	281.626	-0.04289	281.634	-0.01098	280.13	0.02844
279.504	-0.13696	280.709	-0.0807	280.92	-0.05872	287.825		251.021		251.042		281.603	-0.03827	280.956	-0.01477	280.871	-0.01271	281.719	-0.00168	281.726	-0.0212	280.223	0.00496
279.551	-0.10185	280.821	0.04109	281.013		287.917		251.035		251.06		281.697	-0.03996	281.048		280.963		281.867	-0.03933	281.874	-0.03889	280.315	-0.01707
279.564	-0.09772	280.913	-0.05595	281.105		288.009		251.053		251.074		281.846	-0.03619	281.141	-0.01009	281.056		281.96		281.967		280.373	0.000491156
279.658	-0.15205	281.006		281.198	-0.04814	288.06		251.067		251.088		281.938	-0.02885	281.233	0.00631	281.148	-0.05733	282.052		282.059		280.418	-0.03535
279.706	-0.06596	281.098		281.29	-0.61361	288.152		251.081		251.106		282.031		281.329	-0.02754	281.241	-0.03022	282.145	-0.02669	282.152	-0.01641	280.463	-0.0455
279.755	-0.13987	281.191	-0.06003	281.385	-0.07428	288.245		251.099		251.12		282.123		281.421	-0.0187	281.336	-0.05395	282.237	-0.03586	282.29	-0.01734	280.508	-0.03822
279.803	-0.24523	281.283	-0.01103	281.478	-0.05488	288.337		251.113		251.135	0.1173	282.216	-0.0322	281.517	-0.01281	281.428	-0.02745	282.378	0.00496	282.385	0.00691	280.595	-0.04835
279.852	-0.1164	281.378	-0.30125	281.574	-0.02284	288.43		251.128	0.21771	251.152	0.02555	282.357	-0.03158	281.612	0.0136	281.524	-0.01433	282.471	-0.02231	282.478	-0.01493	280.687	0.013
279.867	-0.11696	281.471	-0.01298	281.669	-0.02894	288.522	-0.11576	251.145	0.13344	251.167	0.11193	282.449	-0.03058	281.705	0.01175	281.619	-0.04059	282.563	-0.34124	282.57	-0.27361	280.804	-0.04606
279.959		281.567	-0.02641	281.817	-0.08753	288.615	0.09243	251.16	0.06884	251.181	-0.01384	282.542	-0.05442	281.853	-0.00711	281.712	-0.01359	282.656	-0.04788	282.663	-0.00384	280.892	-0.00502
280.052		281.662	-0.01122	281.91	-0.01631	288.707	-0.09639	251.174	0.07996	251.199	0.1299	282.634	-0.01994	281.946	0.01521	281.86	-0.01645	282.754	-0.0471	282.762	-0.02444	280.984
280.144	-0.07158	281.81	-0.19529	282.002		288.8	-0.11697	251.192	-0.03315	251.213	-1.52337	282.733	-0.00149	282.038		281.953	-0.03482	282.847	-0.03249	282.854	0.00631	281.077
280.237	-0.09574	281.903	-0.00374	282.095		288.892	-0.0372	251.206	0.11684	251.227	-0.64528	282.826	-0.03832	282.131	0.00279	282.045		282.94	0.00112	282.947	-0.02514	281.169	0.03865
280.337	-0.06626	281.995		282.187	-0.05113	288.985		251.22	-1.69034	251.245	-0.02388	282.918	0.00456	282.223	0.02262	282.138	-0.00387	283.032		283.039		281.262	-0.02178
280.382	-0.0849	282.088		282.328	-0.05434	289.077		251.238	-0.00977	251.259	0.05431	283.011		282.364	-0.01202	282.23	-0.01047	283.125		283.132	0.00412	281.357	-0.09589
280.427	-0.10177	282.18	-0.00628	282.421	-0.02011	289.17	-0.03534	251.252	-0.00441	251.274	-0.0311	283.103		282.457	0.02169	282.371	0.0066	283.217	0.00414	283.224	0.00673	281.449	0.00888
280.472	-0.14199	282.321	-0.08793	282.513	-0.04387	289.263	-0.05643	251.266	-0.98451	251.291	0.05888	283.196	-0.00968	282.549	-0.18214	282.464	-0.00421	283.31	-0.0339	283.317	0.01623	281.546	-0.01465
280.517	-0.13347	282.414	0.02214	282.606	-0.05948	289.355	0.10032	251.284	0.07496	251.306	0.01494	283.288	-0.02935	282.642	-0.0528	282.556	-0.28698	283.402	-0.01724	283.409	0.01116	281.641	-0.00668
280.609	-0.13171	282.506	-0.04367	282.704	0.00298	289.448	-0.068	251.299	0.0787	251.32	0.09175	283.381	-0.000700849	282.74	0.00584	282.649	-0.06684	283.495	-0.00117	283.502	0.00936	281.881	-0.05039
280.701	-0.11252	282.599	-0.05053	282.797	-0.06193	289.54	-0.03448	251.313	-0.03219	251.338	0.00747	283.473	-0.05558	282.833	0.01088	282.747	-0.01654	283.587	-0.05316	283.594	-0.02005	281.974
280.814	-0.16109	282.697	0.01133	282.89	-0.0416	289.633	-0.06866	251.331	0.07775	251.352	0.05279	283.566	0.00295	282.925	-0.02282	282.84	-0.02079	283.68	-0.01912	283.687	-0.0326	282.067
280.906	-0.23068	282.79	-0.03812	282.982		289.725	-0.04422	251.345	0.00673	251.366	0.09778	283.658	-0.00711	283.018		282.932	0.00808	283.772	-0.06005	283.779	-0.03395	282.159	-0.04157
280.999		282.882	0.00417	283.075		289.818	-0.09417	251.359	0.04286	267.789	-0.02886	283.751	-0.04205	283.11		283.025		283.865	-0.02817	283.872	-0.02772	282.3	-0.0047
281.091		282.975		283.167	-0.02767	289.91	-0.09761	251.377	0.01807	267.881	0.02454	283.843	-0.03509	283.203	-0.02715	283.118		283.957	-0.03577	283.965		282.393	0.00552
281.184	-0.14509	283.068		283.26	-0.00744	290.003		267.781	-0.07952	267.974		283.936	-0.03029	283.295	0.01646	283.21	-0.01694	284.05		284.057		282.485	-0.0018
281.276	-0.17174	283.16	-0.01361	283.352	-0.00286	290.095		267.874	0.02268	268.066		284.028		283.388	0.01411	283.302	-0.00929	284.142	-0.01242	284.149	-0.0395	282.578	-0.14114
281.371	-0.15412	283.253	0.02024	283.445	-0.04733	290.199	-0.06225	267.967		268.159	-0.01348	284.121		283.48	0.01788	283.395	-0.00659	284.235	-0.03215	284.242	-0.0447	282.67	-0.03478
281.464	-0.10156	283.345	0.01294	283.537	-0.03061	290.292	-0.03162	268.059		268.251	0.01227	284.213	-0.00347	283.573	-0.000103289	283.488	0.00542	284.327	0.000254973	284.334	-0.03012	282.769	-0.06367
281.56	-0.14253	283.438	-0.02006	283.63	-0.0516	290.398	-0.05624	268.152	0.000832357	268.344	-0.00214	284.306	-0.0418	283.665	0.00021993	283.58	-0.0065	284.42	-0.05196	284.427	-0.0619	282.861	-0.03987
281.655	-0.09084	283.53	-0.0192	283.722	-0.02029	290.49	0.02685	268.244	0.02474	268.485	-0.00179	284.398	-0.07916	283.758	0.00744	283.673	-0.00806	284.512	-0.05947	284.519	-0.05868	282.954	0.01565
281.803	-0.27421	283.623	-0.00836	283.815	-0.02611	290.583	-0.05263	268.337	-0.00486	268.58	0.01317	284.491	-0.09553	283.851	-0.02812	283.765	-0.00549	284.605	-0.07879	284.612	-0.05997	283.046
281.896	-0.13347	283.715	0.01988	283.907	-0.02825	290.676	-0.05192	268.478	0.02647	268.673	0.02714	284.583	-0.10111	283.943	-0.01576	283.858	0.00767	284.697	-0.02986	284.704	-0.02455	283.139	-0.04127
281.988		283.808	-0.00817	284		290.768	-0.07173	268.573	-0.01991	268.765	0.04285	284.676	-0.0981	284.036		283.95	-0.02236	284.79	-0.03938	284.797	0.03652	283.231	0.00741
282.081		283.9	0.01809	284.092		290.861	-0.04677	268.666	-0.00925	268.858	-0.00287	284.768	-0.03125	284.128	-0.00258	284.043		284.882	-0.04443	284.889	0.02587	283.324	0.01262
282.173	-0.06889	283.993		284.185	-0.04044	290.953	-0.05327	268.758	0.02038	268.951	-0.03348	284.861	-0.02019	284.221	0.0173	284.135	-0.00247	284.975		284.982		283.416	0.01508
282.314	-0.21209	284.085		284.277	-0.0212	291.046		268.851	0.03216	269.043		284.953	0.01379	284.313	0.01027	284.228	-0.03958	285.067		285.074		283.509	-0.00282
282.407	-0.10885	284.178	0.000263857	284.37	-0.08092	291.138	-0.00671	268.943	0.04599	269.136	0.01234	285.046		284.406	-0.00485	284.32	-0.01012	285.185	-0.00388	285.192	-0.01882	283.601	-0.02028
282.499	-0.15555	284.27	0.00779	284.462	-0.08113	291.231	-0.05356	269.036		269.228	-0.0045	285.164	0.00982	284.498	-0.03618	284.413	-0.05285	285.277	0.00228	285.285	0.00235	283.694	0.0085
282.592	-0.20745	284.363	-0.0317	284.555	-0.10403	291.389	-0.05624	269.129	0.01484	269.321	-0.00232	285.256	-0.02371	284.591	-0.02514	284.505	-0.02505	285.37	-0.0443	285.377	-0.00716	283.787	-0.00253
282.69	-0.09375	284.455	-0.1339	284.647	-0.06015	291.482	-0.04737	269.221	-0.0144	269.413	0.01636	285.349	-0.03935	284.683	0.03584	284.598	-0.05779	285.462	-0.02499	285.47	-0.00415	283.879	-0.02216
282.783	-0.29111	284.548	-0.06075	284.74	-0.00976	291.574	-0.11812	269.314	0.0189	269.506	0.01952	285.441	-0.03775	284.776	0.00935	284.69	-0.00666	285.555	-0.03521	285.562	-0.0102	283.972
282.875	-0.1007	284.64	-0.08499	284.832	-0.04516	291.667	-0.14819	269.406	-0.02247	269.599	0.02222	285.534	-0.04012	284.868	0.01089	284.783	-0.01165	285.648	-0.03399	285.655	0.00508	284.064
282.968		284.733	-0.01825	284.925	-0.04342	291.759	-0.15582	269.499	-0.05201	269.691	-0.00184	285.626	-0.04098	284.961		284.875	-0.01796	285.74	-0.02698	285.747	-0.02181	284.157	0.00273
283.061		284.825	-0.02732	285.017		291.852	-0.04192	269.591	-0.07125	269.803	0.01543	285.719	-0.0272	285.053		284.968		285.833	-0.03023	285.84	0.0016	284.249	-0.02594
283.153	-0.1442	284.918	-0.03792	285.135	-0.07	291.944	-0.06513	269.684	-0.06091	269.896	-0.0157	285.811	-0.02344	285.171	0.01449	285.06		285.925	-0.01207	285.932	-0.01998	284.342	-0.01158
283.246	-0.04544	285.01		285.228	-0.05659	292.037		269.796	0.1453	269.988		285.904	-0.00226	285.263	0.0221	285.178	0.00626	286.018		286.025		284.434	-0.04443
283.338	-0.05366	285.103		285.32	-0.0554	292.129	-0.0703	269.888	0.15308	270.081		285.996		285.356	0.02875	285.27	-0.0013	286.11		286.117		284.527	-0.02423
283.431	-0.09949	285.128	-0.0143	285.413	-0.04308	292.222	-0.05823	269.981		270.173	0.01499	286.089		285.448	0.03156	285.363	-0.00975	286.203	-0.00508	286.21	0.00426	284.619	-0.0381
283.523	-0.12484	285.22	-0.02751	285.505	-0.0515	292.314	-0.15939	270.074		270.266	-0.03743	286.181	-0.03407	285.541	0.02211	285.455	-0.03134	286.295	-0.02725	286.302	-0.02408	284.712	-0.02913
283.616	-0.12164	285.313	-0.01054	285.598	-0.04419	292.407	-0.07096	270.166	0.12065	270.358	0.00389	286.274	-0.00938	285.633	0.00198	285.548	-0.01841	286.388	-0.05219	286.395	-0.03102	284.804	0.00592
283.708	-0.09371	285.405	-0.00532	285.69	-0.04072	292.499	-0.12207	270.259	0.08203	270.451	0.03092	286.366	-0.03678	285.726	0.01012	285.64	-0.03782	286.48	-0.0202	286.487	-0.0306	284.897	-0.02408
283.801	-0.14247	285.498	-0.08817	285.783	-0.06887	292.591	-0.26034	270.351	0.14771	270.544	-0.022	286.459	-0.0523	285.818	0.02362	285.733	-0.02619	286.573	-0.02729	286.58	-0.02567	284.989
283.893	-0.08653	285.591	-0.05035	285.875	-0.09582	292.684	-0.15454	270.444	0.11532	270.636	0.04066	286.551	-0.07235	285.911	0.02014	285.826	-0.02993	286.665	-0.06484	286.672	-0.03027	285.082
283.986		285.683	-0.02302	285.968		292.776	-0.07119	270.536	0.11595	270.729	0.03577	286.644	4.28102e-05	286.003		285.918	-0.01025	286.758	-0.02339	286.765	-0.0362	285.199	0.0028
284.078		285.776	-0.03325	286.06		292.869	-0.06278	270.629	0.20538	271.425	0.00363	286.736	0.02421	286.096		286.011		286.85	0.02387	286.857	-0.00817	285.292	0.04884
284.171	-0.08248	285.868	-0.04516	286.153	-0.05698	292.961		270.722	0.19003	271.517	0.00295	286.829	-0.04017	286.188	0.00185	286.103		286.943	-0.03753	286.95	-0.02372	285.384	-0.00402
284.263	-0.13546	285.961		286.245	-0.08173	293.054		271.418	0.19103	271.61	0.00585	286.921	-0.00252	286.281	-0.00451	286.196	0.02008	287.035		287.042		285.477	-0.00558
284.356	-0.12512	286.053		286.338	-0.03881	293.146	-0.04648	271.51	0.25998	271.702	-0.01032	287.014		286.373	0.02996	286.288	-0.01398	287.128	0.00069692	287.135	-0.00881	285.569	-0.01034
284.448	-0.28133	286.146	-0.0551	286.43	-0.03379	293.239	-0.09016	271.603	0.21374	271.795	0.06187	287.106		286.466	0.01176	286.38	-0.01334	287.22	-0.00328	287.227	0.02761	285.662	-0.01932
284.541	-0.18261	286.238	-0.0248	286.523	-0.0135	293.331	-0.11573	271.695	0.22116	271.887	0.01473	287.199	0.005	286.558	0.01796	286.473	-0.03937	287.313	-0.05963	287.32	-0.00864	285.754	0.00787
284.633	-0.24018	286.331	-0.0402	286.615	-0.04784	293.424	-0.09516	271.788	0.19716	271.98		287.291	-0.02395	286.651	0.01394	286.565	-0.0512	287.405	-0.08629	287.412	-0.12695	285.847	0.00138
284.726	-0.10231	286.423	-0.03251	286.708	0.00198	293.516	-0.14595	271.88	0.20259	272.073		287.384	-0.12308	286.743	0.01031	286.658	-0.0151	287.498	-0.0792	287.505	-0.04424	285.939	0.00456
284.818	-0.22226	286.516	-0.01768	286.8	-0.09663	293.609	-0.11441	271.973		272.165	0.05023	287.476	-0.08688	286.836	-0.01505	286.751	-0.01402	287.59	-0.09799	287.597	-0.03068	286.032
284.911	-0.14325	286.608	-0.05698	286.893	-0.05843	293.701	-0.14033	272.065		272.258	-0.00562	287.569	0.02875	286.928	0.0104	286.843	-0.03518	287.682	-0.05784	287.689	-0.01516	286.124
285.003		286.701	-0.04212	286.985		293.794	-0.05021	272.158	0.16296	272.35	0.02695	287.661	-0.089	287.021		286.936	-0.02471	287.775	-0.03385	287.782	-0.02715	286.217	0.01872
285.096		286.793	-0.05341	287.078		293.886	-0.06696	272.251	0.12426	272.443	0.00994	287.753	-0.03769	287.113		287.028		287.867		287.874		286.309	-0.000307646
285.121		286.886	-0.01897	287.17	-0.05494	293.978		272.343	0.20933	272.535	0.00255	287.846		287.206	0.00252	287.12		287.96		287.967		286.402	0.01919
285.213	-0.14955	286.978		287.263	-0.05757	294.071		272.436	0.21365	272.628	0.03162	287.938		287.298	-0.0088	287.213	0.03206	288.102		288.109		286.494	0.00237
285.306	-0.24673	287.071		287.355	-0.14751	294.163	-0.05255	272.528	0.16568	272.721	-0.000208375	288.081		287.391	-0.01705	287.305	0.01788	288.195		288.202		286.587	-0.02387
285.398	-0.1877	287.163	0.01255	287.448	-0.07565	294.256	-0.06844	272.621	0.16925	272.813	0.00217	288.173		287.483	-0.00149	287.398	-0.05048	288.287		288.294		286.679	0.02085
285.491	-0.15789	287.255	0.01605	287.54	-0.08253	294.348	-0.14617	272.713	0.10158	272.906	-0.02263	288.266		287.576	0.0095	287.49	0.03337	288.38		288.387		286.772	0.0224
285.583	-0.18202	287.348	-0.07621	287.633	-0.02553	294.441	-0.06252	272.806	0.07951	272.998		288.358		287.668	0.02589	287.583	0.0251	288.472		288.48		286.864	0.00539
285.676	-0.14772	287.441	-0.08694	287.725	-0.09988	294.533	-0.03326	272.899	0.10127	273.091		288.451		287.761	-0.00129	287.675	0.05531	288.565	-0.04905	288.572	-0.01709	286.957	0.02449
285.769	-0.16742	287.533	-0.08583	287.817		294.625	-0.05784	272.991		273.183	0.00741	288.544		287.853		287.768	0.07988	288.657	-0.07061	288.665	-0.04591	287.049
285.861	-0.21192	287.625	-0.06986	287.91		294.718	-0.073	273.084		273.276	0.03504	288.636	-0.09472	287.945		287.86		288.75	-0.04295	288.757	-0.10676	287.142	-0.00801
285.954	-0.16298	287.718	-0.07686	288.002		294.81	-0.10937	273.176	0.09539	273.368	-0.01871	288.729	-0.0512	288.088		287.953		288.843	-0.10883	288.85	-0.038	287.234	0.02158
286.046		287.81		288.052		294.903	-0.09921	273.268	0.07732	273.461	0.01524	288.821	-0.09487	288.181		288.095		288.935	0.0071	288.942	-0.00177	287.327	-0.0762
286.139	-0.17703	287.903		288.145		294.995		273.361	0.0782	273.553	0.007	288.914	-0.06947	288.273		288.188		289.028		289.035		287.419	-0.000404812
286.231	-0.18572	287.995		288.237		295.088		273.454	0.07737	273.645	-0.00589	289.006		288.366		288.28		289.12		289.127	-0.00137	287.512	0.03239
286.324	-0.28518	288.045		288.33		295.18	-0.10657	273.546	0.10379	273.737	0.02313	289.099		288.458		288.373		289.213	-0.03347	289.22	8.60313e-05	287.604	-0.01132
286.416	-0.14475	288.138		288.423		295.272	-0.10543	273.637	-0.00135	273.83	-0.01118	289.191	-0.01687	288.551	0.02736	288.465		289.305	-0.01666	289.312	0.00529	287.697	-0.00913
286.508	-0.20036	288.23		288.515	-0.03941	295.365	-0.19228	273.73	-0.04561	273.922	0.02957	289.284	-0.041	288.643	0.01478	288.558	-0.1553	289.398	-0.0244	289.405	0.02152	287.789	0.0207
286.601	-0.17046	288.323		288.608	0.00205	295.457	-0.07589	273.823	-0.05203	274.015		289.376	-0.04712	288.736	-0.03677	288.65	0.06228	289.49	-0.10448	289.498	-0.03161	287.881
286.694	-0.20921	288.415		288.7	0.04703	295.55	-0.10583	273.915	0.01064	274.107		289.469	-0.08377	288.828	-0.01098	288.743	-0.04309	289.583	-0.05837	289.59		287.974
286.786	-0.26235	288.508	-0.02004	288.793	-0.05481	295.642	-0.17941	274.008		274.2	0.03285	289.561	-0.0701	288.921	-0.01062	288.835	-0.01203	289.675	-0.05545	289.683	0.03651	288.117
286.879	-0.21259	288.6	0.07223	288.885	-0.1043	295.735	-0.16532	274.1		274.293	-0.01141	289.654	-0.06365	289.013		288.928	-0.0102	289.768	-0.06698	289.775	-0.00325	288.209
286.971		288.693	-0.05439	288.978		295.827	-0.16052	274.193	-0.02298	274.385	-0.0098	289.746	-0.12851	289.106		289.021		289.86	-0.03966	289.868	-0.05661	288.302
287.063		288.785	-0.06308	289.07		295.92	-0.11711	274.286	0.01574	274.456	0.03127	289.839	-0.05921	289.199	0.00402	289.113		289.953	-0.10134	289.96		288.394
287.156	-0.13154	288.878	-0.06959	289.163	-0.04626	296.012		274.378	-0.12417	274.549	-0.01805	289.931	-0.07291	289.291	-0.00264	289.206	0.00874	290.045		290.053		288.487	0.03683
287.248	-0.12557	288.971		289.255	-0.04533	296.116		274.449	0.00195	274.641	-0.02303	290.024		289.384	0.05124	289.298	0.03633	290.138	-0.03038	290.157	0.00834	288.579	0.08445
287.341	-0.21636	289.063		289.348	0.04006	296.208	-0.14109	274.542	-0.05691	274.79	0.01308	290.117		289.476	-0.00253	289.391	-0.11793	290.242	-0.05031	290.249	-0.0041	288.672	-0.05927
287.433	-0.25824	289.156	-0.02687	289.441	0.00207	296.301	-0.13339	274.634	-0.00467	274.931	0.01873	290.221	-0.07578	289.569	0.00718	289.483	-0.00123	290.348	-0.01711	290.355	0.01568	288.764	0.04383
287.526	-0.21438	289.248	-0.04023	289.533	-0.12496	296.393	-0.07546	275.803	-0.00799	275.073		290.327	-0.03869	289.661	0.16043	289.576	-0.02472	290.441	-0.08993	290.448	-0.00587	288.857	-0.00662
287.618	-0.20217	289.341	0.01402	289.625	-0.12349	296.486	-0.10933	275.896	0.02466	275.215	0.01032	290.419	-0.00988	289.754	-0.03132	289.668	-0.02122	290.533	-0.11523	290.54	-0.10412	288.949	0.00224
287.711	-0.12848	289.433	-0.01242	289.718	-0.06743	296.578	-0.10968	275.989		275.357	0.01249	290.512	-0.04434	289.846	-0.01978	289.761	0.00311	290.626	-0.18985	290.633	-0.11306	289.042
287.803		289.526	-0.086	289.811	-0.1198	296.671	-0.14298	276.081		275.498	0.00687	290.604	-0.08433	289.939	-0.05093	289.853	-0.05636	290.718	-0.09696	290.725	-0.0772	289.135	-0.01792
287.896		289.618	0.02003	289.903	-0.08852	296.763	-0.17538	276.174		275.64	0.00692	290.697	-0.05257	290.031		289.946	-0.0828	290.811	-0.05652	290.818	0.02213	289.227	-0.01993
287.988		289.711	-0.04936	289.996		296.856	-0.17051	276.266		275.81	0.02731	290.789	-0.07158	290.124		290.038		290.903	-0.03236	290.911	0.00315	289.32	-0.00457
288.038		289.803	-0.04668	290.088		296.948	-0.07432	276.359		275.903	0.02229	290.882	-0.02967	290.228	-0.0159	290.131	-0.00801	290.996		291.003		289.412	0.02194
288.131		289.896	-0.09271	290.192	-0.06287	297.041		276.452		275.996		290.975		290.334	0.01999	290.235	-0.00125	291.088		291.096		289.505	0.02665
288.223		289.988		290.285	-0.07945	297.133	-0.14666	276.544		276.088		291.067		290.426	0.00191	290.341	0.01462	291.181	-0.02901	291.188	0.01465	289.597	0.00924
288.316		290.081		290.391	-0.03751	297.226	-0.15078	276.637		276.181		291.16	-0.01472	290.519	0.01471	290.434	-0.02161	291.273	-0.04117	291.281	-0.00807	289.69	0.00932
288.408		290.185	-0.01824	290.483	-0.05723	297.318	-0.15798	276.729		276.273		291.252	-0.04236	290.612	-0.00997	290.526	-0.02085	291.34	-0.04941	291.347	-0.000907157	289.782	0.01307
288.501	-0.184	290.277	-0.01707	290.576	-0.2637	297.411	-0.11422	276.822		276.366		291.318	-0.03251	290.704	-0.000577395	290.619	-0.01138	291.432	-0.05351	291.439	0.01435	289.875	0.03299
288.593	-0.04246	290.384	-0.04274	290.668	-0.11559	297.503	-0.12666	276.91		276.459		291.411	-0.04441	290.797	0.01764	290.711	-0.000848192	291.525	-0.08572	291.532	0.33386	289.967
288.686	-0.14839	290.476	-0.12027	290.761	-0.0705	297.596	-0.14452	277.003		276.551		291.503	-0.0879	290.889	0.00546	290.804	0.04697	291.617	-0.04429	291.624	-0.05616	290.06
288.778	-0.30636	290.569	-0.15565	290.853	-0.07418	297.688	-0.17742	277.096		276.644		291.596	-0.0481	290.982		290.896	-0.03827	291.709	-0.03316	291.717	0.01256	290.164	0.02758
288.871	-0.15708	290.661	-0.09348	290.946	-0.05851	297.781	-0.12348	277.188	-0.0136	276.736		291.688	-0.06185	291.074		290.989		291.802	-0.0823	291.809	-0.0087	290.256	0.02371
288.964		290.754	-0.14952	291.039		297.873	-0.11796	277.281	-0.09665	276.829		291.781	-0.06402	291.167	0.02032	291.081		291.894	-0.06526	291.901	-0.0288	290.363	0.02269
289.056		290.846	-0.07818	291.131	-0.05382	297.966		277.373		276.917		291.873	-0.03199	291.259	0.00376	291.174	0.00388	291.987		291.994		290.455	-0.00724
289.149	-0.16072	290.939	-0.04969	291.224	-0.07009	298.058		277.514	0.00689	277.01		291.965		291.325	-0.01289	291.266	-0.00782	292.079		292.087		290.548	0.03183
289.241	-0.12294	291.031		291.382	-0.03548	298.151	-0.10083	277.606	-0.0287	277.103		292.058		291.418	0.04471	291.332	0.01127	292.172	-0.08975	292.179	-0.0508	290.64	0.10005
289.334	-0.08218	291.124		291.475	0.01715	298.243	-0.12119	277.699	-0.02545	277.195	0.01215	292.151	-0.04089	291.51	0.00994	291.425	0.0457	292.264	-0.11688	292.271	-0.04983	290.733	0.14256
289.426	-0.12044	291.216	-0.06883	291.567	-0.12217	298.336		277.791	0.00224	277.288	-0.23561	292.243	-0.05141	291.603	0.29375	291.517	0.01895	292.357	-0.05932	292.364	0.00379	290.825	-0.00989
289.519	-0.12865	291.375	-0.08107	291.66	-0.07211	298.429		277.884	-0.00297	277.38	-0.19458	292.335	-0.03166	291.695	-0.04144	291.61	0.00325	292.449	-0.05831	292.456	-0.04578	290.918	0.0093
289.611	-0.12844	291.468	-0.05148	291.752	-0.23053	298.531	-0.12454	277.976		277.521	-0.02341	292.428	-0.04272	291.788	-0.00421	291.702	0.0107	292.542	-0.09735	292.549	0.02358	291.01
289.704	-0.11764	291.56	-0.04855	291.844	-0.0906	298.623	-0.11231	278.069		277.613	-0.00512	292.52	-0.09972	291.88	-0.00681	291.795	0.03152	292.634	-0.0237	292.641	-0.02362	291.103
289.796	-0.23102	291.653	-0.08645	291.937	-0.07215	298.716	-0.15826	278.161	0.01661	277.706	-0.03248	292.613	-0.07428	291.973		291.887	0.0232	292.727	-0.05378	292.734	-0.07233	291.195	0.0519
289.889	-0.17824	291.745	-0.13532	292.029		298.809	-0.1547	278.253	-0.02527	277.798	-0.01451	292.705	-0.08403	292.065		291.98		292.819	-0.05675	292.826	-0.01357	291.288	0.01344
289.981		291.837	-0.07062	292.122		298.901	-0.10973	278.347	0.00865	277.891	-0.0062	292.798	-0.04567	292.158	-0.01402	292.072		292.912	-0.04949	292.919	0.00174	291.354	-0.00225
290.074		291.93	-0.04902	292.214	-0.03807	298.994		278.439	0.03247	277.983		292.89	-0.04863	292.25	0.00247	292.165	-0.02295	293.004		293.011		291.446	-0.03115
290.178	-0.09071	292.022		292.307	-0.05328	299.086		278.532	0.04006	278.076		292.983		292.343	0.01778	292.257	0.00761	293.097		293.104		291.539	0.00829
290.27	-0.09988	292.115		292.399	-0.02355	299.179	-0.10036	278.624	0.00457	278.168	0.00242	293.075		292.435	0.12546	292.35	-0.00492	293.189	-0.0931	293.196	-0.01093	291.631	0.00972
290.377	-0.13526	292.207	-0.07523	292.492	-0.08079	299.271	-0.1	278.716	-0.0052	278.261	0.01372	293.168	-0.04211	292.528	0.00604	292.442	0.01323	293.282	-0.09397	293.289	-0.03586	291.724	0.29663
290.469	-0.13178	292.3	-0.12165	292.584	-0.12044	299.364	-0.12312	278.824	-0.01561	278.354	0.0319	293.26	-0.06453	292.62	0.02924	292.535	-0.00438	293.374	-0.0551	293.381	-0.00382	291.816	-0.01469
290.562	-0.14731	292.392	-0.04863	292.677	-0.14655	299.456	-0.10348	278.917	0.00679	278.446	-0.0124	293.353	-0.06644	292.712	-0.01702	292.627	-0.00737	293.467	-0.06721	293.474	0.00314	291.909	0.00179
290.654	-0.15079	292.485	-0.11158	292.769	-0.14207	299.549	-0.10137	279.009		278.539	-0.02648	293.445	-0.00785	292.805	-0.00993	292.72	-0.03312	293.559	-0.10444	293.566	-0.28788	292.001
290.747	-0.20161	292.577	-0.00482	292.862	-0.05464	299.642	-0.14362	279.102		278.631	-0.01995	293.538	-0.04761	292.897	0.01553	292.812	-0.00695	293.652	-0.09451	293.659	0.06648	292.094
290.839	-0.10404	292.67	-0.14863	292.954	-0.0728	299.734	-0.15282	279.194		278.724	0.00603	293.63	-0.07973	292.99		292.905	0.02345	293.744	-0.1	293.751	-0.05736	292.186	-0.01546
290.932	-0.06925	292.762	-0.11155	293.047		299.827	-0.11225	279.287		278.832	-0.01238	293.723	-0.08689	293.082		292.997		293.836	-0.06365	293.844	0.00382	292.279	0.0047
291.024		292.855	-0.08612	293.139	-0.04684	299.919	-0.13149	279.359		278.924	0.02263	293.815	-0.02878	293.175	0.01861	293.09		293.929	-0.07333	293.936	0.01588	292.371	-0.0124
291.117		292.947	-0.03715	293.232	-0.05783	300.012		279.418	-0.00799	279.017		293.907	-0.02902	293.267	0.02513	293.182	-0.03521	294.021		294.028		292.464	0.01373
291.209	-0.10084	293.04		293.324	-0.05129	300.104		279.468	-0.0179	279.109		294		293.36	0.0357	293.275	-0.04764	294.114		294.121		292.556	-0.03168
291.368	-0.10745	293.132	-0.05826	293.417	0.02443	300.197	-0.12	279.519	-0.04399	279.202		294.092		293.452	0.0767	293.367	0.01273	294.206	-0.14542	294.213	-0.04142	292.648	0.01577
291.461	-0.15469	293.225	-0.10458	293.509	-0.04601	300.289	-0.12392	279.592	-0.00268	279.294		294.185	-0.04616	293.545	0.01103	293.459	0.02726	294.298	-0.08393	294.306	-0.06688	292.741	0.0406
291.553	-0.16128	293.317	-0.09202	293.602	-0.06366	300.382	-0.0789	279.671	-0.02846	279.363		294.277	-0.05366	293.637	0.000247942	293.552	-0.02323	294.391	-0.11072	294.398	0.00541	292.833	0.00439
291.645	-0.1523	293.41	-0.08448	293.694	-0.01509	300.474	-0.04415	279.719	0.00989	279.421	-0.00050637	294.369	-0.06337	293.73	-0.08039	293.644	0.42537	294.483	-0.0387	294.49	0.00278	292.926	0.00306
291.738	-0.30998	293.502	-0.09516	293.787	-0.02048	300.567	-0.08854	279.768	-0.01772	279.472	-0.0101	294.462	-0.02427	293.822	-0.01537	293.737	0.02144	294.576	-0.09553	294.583	-0.05313	293.018
291.83	-0.07345	293.595	-0.14678	293.879	-0.03908	300.659	-0.11847	279.816	0.00874	279.523	0.00406	294.554	-0.00599	293.915	-0.01665	293.829	-0.0147	294.668	-0.09288	294.675	-0.0327	293.111
291.923	-0.08615	293.687	-0.10658	293.971		300.752	-0.14284	279.895	-0.00189	279.599	-0.01025	294.647	-0.03825	294.007		293.922	0.00151	294.761	-0.10302	294.768	-0.07489	293.203	-0.01237
292.015		293.779	-0.07563	294.064		300.844	-0.1353	279.988		279.674	-0.02283	294.739	-0.08233	294.099		294.014		294.853	-0.11951	294.86	-0.06322	293.296	-0.02506
292.108		293.872	-0.08799	294.156	-0.05881	300.937	-0.12575	280.08		279.723	0.00733	294.832	-0.0655	294.192	0.01195	294.107		294.945	-0.11882	294.952	-0.04605	293.388	0.0115
292.2	-0.14537	293.964		294.249	-0.0212	301.03		280.173	-0.02703	279.771	0.0019	294.924	-0.05092	294.284	0.01071	294.199	-0.03261	295.038		295.045		293.481	-0.04503
292.293	-0.13584	294.057		294.341	-0.03319	301.122		280.265	0.01089	279.82	-0.01966	295.016		294.377	0.05845	294.291	-0.04991	295.13	-0.13709	295.137	-0.11598	293.573	-0.02595
292.385	-0.07774	294.149	-0.1176	294.433	-0.02852	301.215	-0.1295	280.35	0.00288	279.902	-0.00403	295.109		294.469	0.00467	294.384	-0.03136	295.223	-0.10545	295.23	-0.04849	293.666	-0.02858
292.478	-0.24397	294.241	-0.12076	294.526	-0.00801	301.307	-0.10253	280.395	-0.000568118	279.995		295.201	-0.05646	294.561	0.03388	294.476	0.00436	295.315	-0.13863	295.322	-0.1037	293.758	0.0151
292.57	-0.23909	294.334	-0.1253	294.618	-0.02511	301.412	-0.03947	280.44	-0.04513	280.088		295.294	-0.10377	294.654	0.03575	294.569	-0.01024	295.408	-0.08126	295.415	-0.02064	293.851	0.01062
292.663	-0.23665	294.426	-0.10004	294.711	-0.05277	301.505	-0.03642	280.485	-0.04109	280.18	-0.01294	295.386	-0.07277	294.746	-0.04065	294.661	0.00632	295.5	-0.07613	295.507	-0.04952	293.943	0.000937653
292.755	-0.22243	294.519	-0.08428	294.803	-0.04361	301.597	-0.04961	280.545	-0.044	280.272	0.00538	295.479	-0.04107	294.839	-0.00898	294.753	-0.03051	295.593	-0.10782	295.6	-0.05666	294.036
292.848	-0.1201	294.611	-0.10135	294.896	-0.03917	301.69	-0.0833	280.637	-0.04249	280.353	0.00436	295.571	-0.10494	294.931	-0.00827	294.846	-0.0405	295.685	-0.14307	295.692	-0.12027	294.128	0.00381
292.94	-0.11142	294.704	-0.06209	294.988		301.782	-0.13273	280.754	-0.01396	280.398	-0.02831	295.664	-0.10389	295.024		294.938	-0.07827	295.778	-0.15498	295.785	-0.09906	294.22	-0.01513
293.033		294.796	-0.1409	295.08		301.875	-0.08718	280.842	0.000234801	280.443	-0.04322	295.756	-0.1191	295.116		295.031		295.87	-0.13385	295.877	-0.10949	294.313	-0.02058
293.125		294.888	-0.14004	295.173	-0.05275	301.967		280.935	-0.000305251	280.488	-0.05546	295.849	-0.13652	295.209	-0.02965	295.123		295.962		295.969		294.405	0.00366
293.217	-0.111	294.981		295.265	-0.05014	302.06		281.027		280.552	0.00647	295.941	-0.06401	295.301	-0.04322	295.216	-0.07401	296.055		296.062		294.498	-0.00809
293.31	-0.23887	295.073		295.358	-0.11568	302.152	-0.11018	281.12		280.645	-0.01621	296.033		295.393	0.0102	295.308	-0.09163	296.159	-0.1143	296.166	-0.07767	294.59	0.02811
293.402	-0.12884	295.166	-0.16203	295.45	0.00264	302.245	-0.09052	281.212	-0.02712	280.761	-0.0123	296.137	-0.09482	295.486	0.04085	295.401	-0.03046	296.251	-0.12271	296.258	-0.0564	294.682	-0.00436
293.495	-0.1838	295.258	-0.12287	295.543	-0.02666	302.337	-0.16158	281.305		280.849	0.00963	296.23	-0.04618	295.578	0.01955	295.493	-0.07766	296.343	-0.10163	296.351	-0.04746	294.775	-0.00854
293.587	-0.2365	295.351	-0.08503	295.635	-0.08065	302.43	-0.04851	281.4	-0.0428	280.942	-0.02029	296.322	-0.05183	295.671	0.0095	295.585	-0.06772	296.436	-0.1056	296.443	-0.03496	294.867	-0.01984
293.68	-0.259	295.443	-0.0708	295.728	-0.12236	302.523	-0.04212	281.492	-0.04253	281.034		296.414	-0.00546	295.763	0.03042	295.678	-0.12775	296.528	-0.10661	296.536	-0.11601	294.96
293.772	-0.1989	295.536	-0.11762	295.82	-0.12169	302.615	-0.07027	281.588	-0.00693	281.127	0.0021	296.507	-0.05458	295.856	0.0084	295.77	-0.06772	296.621	-0.10451	296.628	-0.14497	295.052
293.865	-0.13682	295.628	-0.11347	295.912	-0.10923	302.708	-0.07245	281.683	-0.01915	281.219	-0.000451201	296.599	-0.10901	295.948	0.0319	295.863	-0.07908	296.713	-0.10194	296.72	-0.15826	295.145	-0.07706
293.957	-0.12749	295.721	-0.27146	296.005		302.8	-0.07203	281.832	-0.03784	281.312	-0.27218	296.692	-0.12039	296.041		295.955	-0.10871	296.806	-0.12288	296.813	-0.16575	295.237	-0.01765
294.05		295.813	-0.30227	296.109		302.893	-0.11991	281.924	-0.04172	281.407	-0.02449	296.784	-0.13221	296.144	0.00523	296.048		296.898	-0.14667	296.906	-0.15605	295.329	-0.07522
294.142	-0.07362	295.905	-0.21707	296.201	-0.05665	302.985		282.017		281.503	-0.01842	296.877	-0.07568	296.237	0.02017	296.151	-0.07841	296.991		296.998		295.422	0.01237
294.234	-0.10477	295.998		296.294	-0.03134	303.078		282.109		281.595	-0.01113	296.969		296.329	0.00307	296.244	-0.08248	297.083		297.091		295.514	0.0103
294.327	-0.12548	296.102		296.386	-0.00784	303.17	-0.08929	282.202	-0.00624	281.69	0.00122	297.062		296.422	0.00338	296.336	-0.03015	297.176	-0.09831	297.183	-0.1788	295.607	-0.0275
294.419	-0.18029	296.194	-0.14131	296.479	-0.07837	303.263	-0.07547	282.343	-0.02701	281.839	-0.03382	297.155	-0.0548	296.514	-0.02452	296.429	-0.13713	297.268	-0.08946	297.276	-0.12587	295.699	-0.0465
294.512	-0.15687	296.286	-0.13562	296.571	-0.15199	303.355	-0.11178	282.435	0.01228	281.931	0.01483	297.247	-0.06247	296.607	-0.05585	296.521	-0.12788	297.361	-0.0975	297.368	-0.08384	295.792	-0.10754
294.604	-0.17894	296.379	-0.05205	296.663	-0.13536	303.448	-0.12806	282.528	-0.05076	282.024		297.34	-0.08713	296.699	-0.07514	296.614	-0.18118	297.453	-0.1888	297.461	-0.21445	295.884	-0.05228
294.696	-0.10993	296.471	-0.07309	296.756	-0.15393	303.54	-0.06219	282.62	-0.0671	282.116		297.432	-0.12476	296.792	-0.15424	296.706	-0.16086	297.546	-0.11226	297.553	-0.15205	295.977
294.789	-0.16295	296.564	-0.134	296.849	-0.17428	303.633	-0.04793	282.719	0.00535	282.209	-0.01746	297.525	-0.05543	296.884	-0.10748	296.799	-0.16769	297.638	-0.14041	297.645	-0.14896	296.069
294.881	-0.15716	296.656	-0.42319	296.941	-0.13142	303.725	-0.0442	282.811	-0.05063	282.35	-0.00468	297.617	-0.1008	296.977		296.891	-0.11596	297.731	-0.12435	297.738	-0.18471	296.173	-0.05656
294.974		296.749	-0.35768	297.034		303.818	-0.067	282.904	-0.03646	282.442	-0.03638	297.709	-0.14528	297.069		296.984		297.823	-0.11169	297.831	-0.1216	296.265	-0.07116
295.066		296.841	-0.29817	297.126	-0.11399	303.91	-0.05115	282.996		282.535	-0.13926	297.802	-0.09924	297.162	-0.08882	297.076		297.916	-0.09988	297.923	-0.1306	296.358	0.00469
295.159	-0.13754	296.934	-0.20496	297.219	-0.15989	304.003		283.089		282.627	-0.05321	297.894	-0.04038	297.254	-0.0929	297.169	-0.13423	298.008		298.016		296.45	-0.01728
295.251	-0.18014	297.026		297.311	-0.12558	304.095		283.182	0.00764	282.726	-0.01823	297.987		297.347	-0.09234	297.261	-0.14128	298.101		298.108		296.543	-0.08644
295.344	-0.18156	297.119		297.404	-0.11055	304.188	-0.05141	283.274	0.01256	282.818	-0.02948	298.08		297.439	-0.14725	297.354	-0.13741	298.194	-0.07205	298.201	-0.16598	296.635	-0.0535
295.436	-0.20439	297.211	-0.17708	297.496	-0.13585	304.28	-0.03959	283.366	-0.008	282.911	0.01236	298.172	-0.09093	297.532	-0.07474	297.446	-0.28544	298.286		298.293		296.728	-0.09189
295.528	-0.23879	297.304	-0.18182	297.589	-0.14442	304.373	-0.01071	283.459	-0.03309	283.004		298.265		297.624	-0.06707	297.539	-0.19604	298.379		298.386		296.82	-0.12858
295.621	-0.21496	297.396	-0.13975	297.681	-0.1495	304.465		283.552	-0.0189	283.096		298.357		297.717	-0.11796	297.631	-0.17566	298.471		298.478		296.913	-0.0722
295.713	-0.27179	297.489	-0.1818	297.774	-0.16845	304.558		283.644	-0.00902	283.189	-0.000448192	298.45		297.809	-0.07031	297.724	-0.27037	298.574	-0.11206	298.581	-0.10761	297.005
295.806	-0.20784	297.581	-0.20648	297.866	-0.12701	304.65		283.737	0.00926	283.281	-0.00332	298.552	-0.07474	297.902	-0.09912	297.816	-0.16258	298.666	-0.08342	298.673	-0.11107	297.098
295.898	-0.20872	297.674	-0.18769	297.959		304.743		283.829	-0.00632	283.374	0.01863	298.645	-0.07089	297.994		297.909	-0.14974	298.759	-0.12471	298.766	-0.19676	297.19	-0.12508
295.991		297.766	-0.35486	298.051		304.835		283.922	0.02152	283.466	-0.01689	298.737	-0.12903	298.087		298.001		298.851	-0.09973	298.859	-0.13754	297.283	-0.09042
296.094		297.859	-0.21083	298.144	-0.13983	304.928		284.014		283.559	-0.00297	298.83	-0.05731	298.179	-0.07383	298.094		298.944	-0.07973	298.951	-0.16811	297.375	-0.08834
296.187	-0.15404	297.951	-0.15592	298.236	-0.09993	305.02		284.107		283.651	-0.00723	298.923	-0.04987	298.272		298.186	-0.16499	299.037		299.044		297.468	-0.11282
296.279	-0.12652	298.044		298.329		305.113		284.199	0.02312	283.744	-0.01199	299.015		298.364		298.279		299.129	-0.0709	299.136	-0.10895	297.56	-0.08274
296.372	-0.10021	298.136	-0.29506	298.421		305.206		284.292	0.00983	283.836	-0.03239	299.108		298.457		298.372		299.222	-0.09104	299.229	-0.11244	297.653	-0.08574
296.464	-0.15347	298.229	-0.28367	298.524	-0.14016	305.298		284.384	-0.05195	283.929	0.0213	299.2	-0.03487	298.559	-0.05193	298.464		299.314	-0.12723	299.321	-0.10634	297.745	-0.09066
296.557	-0.17368	298.322		298.616	-0.11318	305.391		284.477	-0.02123	284.021		299.293	-0.0304	298.652	-0.04858	298.567	-0.15886	299.407	-0.06269	299.414	-0.0918	297.838	-0.0867
296.649	-0.18627	298.414		298.709	-0.14703	305.483		284.569	0.00407	284.114		299.385	-0.05178	298.745	-0.07734	298.659	-0.17153	299.499	-0.03952	299.506	-0.10143	297.93	-0.06893
296.742	-0.22507	298.517	-0.1449	298.801	-0.12691	305.589	0.0516	284.662	0.01033	284.206	-0.03102	299.478	-0.01151	298.837	-0.0415	298.752	-0.20841	299.592	-0.10009	299.599	-0.08972	298.023
296.834	-0.18573	298.609	-0.25329	298.894	-0.13708	305.681	0.05649	284.754	0.10654	284.299	-0.000427174	299.57	-0.04613	298.93	-0.07287	298.844	-0.19267	299.684	-0.07689	299.691	-0.09533	298.115
296.927	-0.17911	298.702	-0.29744	298.987		305.774	0.07289	284.847	0.12832	284.391	-0.036	299.663	-0.07123	299.022		298.937	-0.18043	299.777	-0.07868	299.784	-0.15998	298.208	-0.08678
297.019		298.794	-0.31591	299.079		305.866	0.04919	284.939	0.12559	284.484	-0.02859	299.755	-0.11278	299.115		299.029		299.869	-0.11593	299.877	-0.14629	298.3
297.112		298.887	-0.22074	299.172	-0.04872	305.959		285.032		284.576	-0.0398	299.848	-0.06509	299.207	-0.07047	299.122		299.962		299.969		298.393
297.204	-0.15333	298.979		299.264	-0.07127	306.051		285.149	0.12222	284.669	-0.04038	299.94	-0.03309	299.3	-0.02858	299.214	-0.15218	300.054		300.062		298.486
297.297	-0.12948	299.072		299.357	-0.12039	306.144	0.06213	285.242	0.12286	284.761	-0.00198	300.033		299.392	-0.01605	299.307	-0.1618	300.147	-0.0856	300.154	-0.10526	298.588	-0.08335
297.389	-0.13811	299.165	-0.19504	299.449	-0.08315	306.237	0.04193	285.334	0.15469	284.854	0.0032	300.126	-0.05907	299.485	-0.03256	299.4	-0.15263	300.24	-0.08104	300.247	-0.14235	298.68	-0.06669
297.482	-0.22706	299.257	-0.17614	299.542	-0.12572	306.329	0.04952	285.427	0.15392	284.946	0.0129	300.218	-0.056	299.577	-0.03028	299.492	-0.12414	300.332	-0.10068	300.339	-0.13382	298.773	-0.11797
297.574	-0.13105	299.35	-0.17315	299.634	-0.12243	306.422	0.06955	285.519	0.10035	285.039		300.311	-0.0636	299.67	-0.04632	299.585	-0.19259	300.425	-0.11355	300.432	-0.0849	298.866	-0.1273
297.667	-0.15589	299.442	-0.11679	299.727	-0.17006	306.514	0.09717	285.612	0.12908	285.156	-0.02298	300.403	0.02213	299.763	-0.10312	299.677	-0.19831	300.517	-0.06788	300.524	-0.08294	298.958	-0.1099
297.759	-0.1918	299.535	-0.17369	299.819	-0.1717	306.607	0.10665	285.704	0.12178	285.249	-0.03562	300.496	-0.00861	299.855	-0.06266	299.77	-0.20342	300.61	-0.05789	300.617	-0.06428	299.051
297.852	-0.09278	299.627	-0.16424	299.912	-0.14478	306.699	0.07276	285.797	0.13887	285.341	-0.03072	300.588	-0.07041	299.948	-0.06267	299.862	-0.25495	300.702	-0.08061	300.709	-0.13463	299.143	-0.09103
297.944	-0.13213	299.72	-0.29358	300.005		306.791	0.04212	285.89	0.07776	285.434	-0.0278	300.681	-0.0549	300.04		299.955	-0.22065	300.795	-0.06627	300.802	-0.15628	299.236	-0.03668
298.037		299.812	-0.20378	300.097		306.884	0.03721	285.982		285.527	-0.04629	300.773	-0.10411	300.133	-0.04416	300.047		300.887	-0.06807	300.894	-0.15594	299.328	-0.15386
298.129	-0.11772	299.905	-0.19742	300.19	-0.07174	306.977		286.075		285.619	-0.02232	300.866	-0.07801	300.225	-0.06923	300.14	-0.19079	300.98		300.987		299.421	-0.09769
298.222	-0.16425	299.997		300.282	-0.09028	307.069		286.167	0.03163	285.712	-0.02562	300.958	-0.05483	300.318	-0.02987	300.232	-0.18169	301.072		301.08		299.513	-0.06651
298.315		300.09		300.375	-0.07939	307.162	0.02805	286.26	0.02795	285.804	0.00747	301.051		300.41	0.0168	300.325	-0.16358	301.165	-0.08875	301.172	-0.12674	299.606	-0.08105
298.407		300.183	-0.13458	300.467	-0.06191	307.254	0.04294	286.352	0.1062	285.897	-0.01376	301.144	0.00365	300.503	-0.00998	300.417	-0.11006	301.257	-0.0731	301.265	-0.15155	299.699	-0.0688
298.51		300.275	-0.27936	300.56	-0.04722	307.347	0.04576	286.444	0.11962	285.989		301.236	-0.04954	300.595	-0.02891	300.51	-0.12142	301.35	-0.07764	301.357	-0.1172	299.791	-0.15531
298.602	-0.09224	300.368	-0.15552	300.652	-0.064	307.439	0.05055	286.537	0.0937	286.082		301.329	-0.07172	300.688	-0.09436	300.602	-0.12485	301.455	-0.05355	301.462	-0.0865	299.884	-0.11632
298.695	-0.14386	300.46	-0.09687	300.745	-0.08391	307.532	0.0468	286.629	0.0599	286.174	-0.04214	301.434	-0.00914	300.78	-0.03995	300.695	-0.19604	301.548	-0.07889	301.555	-0.08425	299.976
298.787	-0.15725	300.553	-0.15846	300.837	-0.08173	307.624	0.07817	286.722	0.10514	286.267	0.02747	301.526	-0.02461	300.873	-0.04334	300.788	-0.21518	301.64	-0.05704	301.647	-0.08344	300.069
298.88	-0.11296	300.645	-0.14838	300.93	-0.17359	307.717	0.09275	286.814	0.11324	286.359	-0.05817	301.619	-0.03866	300.966		300.88	-0.20961	301.733	-0.07909	301.74	-0.09441	300.161	-0.08796
298.972		300.738	-0.26817	301.022		307.809	0.04845	286.907	0.09639	286.452	-0.04138	301.711	-0.08906	301.058		300.973		301.825	-0.04291	301.832	-0.12392	300.254	-0.11389
299.065		300.83	-0.25057	301.115		307.902	0.02239	286.999		286.544	-0.05139	301.804	-0.03506	301.151	-0.02448	301.065		301.918	-0.05132	301.925	-0.09775	300.346	-0.09279
299.157	-0.06919	300.923	-0.1728	301.208	-0.09509	307.994		287.092		286.637	-0.04434	301.896	-0.05567	301.243	-0.04235	301.158	-0.1665	302.01		302.017		300.439	-0.0332
299.25	-0.12287	301.015		301.3	-0.10958	308.087		287.184	0.06281	286.729	0.00348	301.989		301.336	-0.00365	301.25	-0.18989	302.103		302.11		300.531	-0.02311
299.343	-0.12678	301.108		301.405	-0.05495	308.18	0.04454	287.277	0.07549	286.822	-0.01379	302.081		301.441	-0.00526	301.343	-0.23659	302.195	-0.0815	302.202	-0.08283	300.624	-0.07893
299.435	-0.04927	301.2	-0.20383	301.498	-0.04664	308.272	0.06745	287.369	0.137	286.914	0.00893	302.174	-0.01562	301.533	-0.03163	301.448	-0.13519	302.288	-0.08556	302.295	-0.08231	300.716	-0.04972
299.528	-0.07173	301.293	-0.23573	301.59	-0.0156	308.365	0.08196	287.462	0.11821	287.007		302.266	-0.04034	301.626	-0.02497	301.54	-0.13836	302.38	-0.03313	302.387	-0.07131	300.809	-0.09532
299.62	-0.12144	301.398	-0.14481	301.683	-0.05276	308.457	0.10522	287.554	0.08129	287.099		302.359	-0.01359	301.718	-0.06412	301.633	-0.15058	302.473	-0.02988	302.48	-0.07064	300.901	-0.09391
299.713	-0.08486	301.491	-0.12695	301.775	-0.1053	308.55	0.12529	287.647	0.14385	287.192	-0.01498	302.451	-0.01646	301.811	-0.03044	301.725	-0.15286	302.565	-0.04724	302.572	-0.05541	300.994
299.805	-0.14914	301.583	-0.15302	301.868	-0.10301	310.44	0.03694	287.739	0.15309	287.284	0.02016	302.544	-0.0041	301.903	-0.04321	301.818	-0.15206	302.658	-0.05723	302.665	-0.07335	301.087
299.898	-0.09868	301.675	-0.15133	301.96		310.532		287.832		287.377	-0.04265	302.636	-0.01282	301.996		301.91	-0.17228	302.75	-0.04341	302.758	-0.08561	301.179	-0.08553
299.99		301.768	-0.15773	302.053		310.625	0.04456	287.924		287.469	-0.08172	302.729	-0.01143	302.088		302.003		302.843	-0.03205	302.85	-0.08176	301.272	-0.08525
300.083		301.861	-0.15494	302.145	-0.01628	321.528	0.00645	288.016		287.561	-0.06785	302.821	-0.0443	302.181	-0.0285	302.096		302.935	-0.06196	302.943	-0.04273	301.364	-0.13092
300.175	-0.04528	301.953	-0.15857	302.238	-0.06527	321.712	0.00842	288.067		287.654	-0.02153	302.914	0.01541	302.273	-0.00247	302.188	-0.13541	303.028		303.035		301.469	-0.0914
300.268	-0.08909	302.046		302.33	-0.03715	321.897	0.0101	288.159		287.746	0.00181	303.007		302.366	0.00428	302.281	-0.16328	303.121		303.128	-0.08297	301.562	-0.07043
300.36	-0.12723	302.138	-0.13421	302.423	-0.02385	322.081		288.252		287.839		303.099		302.459	0.00334	302.373	-0.09282	303.213	-0.0664	303.22	-0.07805	301.654	-0.07934
300.453	-0.05811	302.231	-0.09034	302.515	0.01505	322.266	0.01215	288.344		287.931		303.192	-0.02318	302.551	-0.01662	302.466	-0.08792	303.306	-0.06165	303.313	-0.07191	301.747	-0.10707
300.545	-0.0828	302.323	-0.148	302.608	-0.02188	322.444	0.01414	288.437		288.024		303.284	-0.00663	302.644	-0.0081	302.558	-0.10906	303.398	-0.0575	303.405	-0.1206	301.839	-0.12015
300.638	-0.12279	302.416	-0.07465	302.701	0.01653	322.586	0.01822	288.529	0.16223	288.074		303.377	-0.07415	302.736	-0.02546	302.651	-0.10534	303.491	-0.09065	303.498	-0.11495	301.932	-0.09059
300.73	-0.14971	302.508	-0.06365	302.793	-0.04158	322.727	0.01734	288.622	0.10905	288.166		303.469	-0.05316	302.829	-0.0657	302.743	-0.13113	303.583	-0.06448	303.59	-0.09644	302.024
300.823	-0.09912	302.601	-0.13401	302.886	-0.01746	322.869	0.01756	288.714	0.0947	288.259		303.562	-0.00114	302.921	-0.01686	302.836	-0.16905	303.676	-0.00888	303.683	-0.05346	302.117
300.916	-0.15205	302.693	-0.09613	302.978		323.011		288.807	0.03566	288.351		303.654	-0.02331	303.014		302.928	-0.13145	303.768	-0.06372	303.775	-0.09089	302.209	-0.08021
301.008		302.786	-0.16846	303.071		323.152	0.01497	288.899	0.04263	288.444		303.747	-0.01226	303.106		303.021		303.861	-0.07953	303.868	-0.07828	302.302	-0.05274
301.101		302.878	-0.17283	303.163	-0.03981	323.294	0.01549	288.992		288.536	-0.09693	303.839	0.01043	303.199	-0.00574	303.113		303.953	-0.03288	303.96		302.395	-0.05568
301.193	-0.09994	302.971		303.256	-0.02221	323.436	0.01691	289.085		288.629	-0.10859	303.932	-0.00648	303.291	0.000963144	303.206	-0.11821	304.046		304.053		302.487	-0.06064
301.286	-0.07408	303.063		303.348	-0.06605	323.492	-0.01635	289.177	0.07925	288.721		304.024		303.384	-0.0274	303.298	-0.12639	304.138	0.01325	304.145	-0.05428	302.58	-0.07739
301.391	-0.07381	303.156	-0.16658	303.441	-0.05019	323.584	-0.03606	289.27	0.08488	288.814	0.10023	304.117		303.476	-0.00846	303.391	-0.16798	304.231	-0.0165	304.238	-0.06647	302.672	-0.05055
301.483	-0.01863	303.249	-0.10654	303.533	-0.01302	323.677	-0.03296	289.362	0.0882	288.907	-0.07006	304.209	0.01338	303.569	-0.00633	303.483	-0.15691	304.323	-0.02272	304.33	-0.05985	302.765	-0.14648
301.576	-0.06038	303.341	-0.15657	303.626	-0.00359	323.77	-0.03899	289.455	0.17288	288.999		304.302	0.01005	303.661	-0.01767	303.576	-0.1873	304.416	-0.06609	304.423	-0.05608	302.857	-0.11054
301.668	-0.06817	303.434	-0.13208	303.718	-0.03909	323.862	0.03621	289.547	0.05338	289.092		304.394	-0.0265	303.754	-0.03396	303.668	-0.09839	304.508		304.515		302.95	-0.0619
301.761	-0.09876	303.526	-0.17326	303.811	-0.04676	323.955	0.06325	289.64	0.21543	289.184	-0.00742	304.487		303.846	-0.0115	303.761	-0.17881	304.601		304.608		303.042
301.853	-0.05256	303.619	-0.12957	303.903	0.0148	324.047		289.732	-0.000215808	289.277	-0.03421	304.579		303.939	-0.02561	303.853	-0.1484	304.693		304.7		303.135	-0.0896
301.946	-0.04896	303.711	-0.12015	303.996		324.14	0.06422	289.825	0.05794	289.369	-0.01382	304.672		304.031		303.946	-0.12719	304.786		304.793		303.227	-0.08675
302.038		303.804	-0.16382	304.088		324.232	0.06262	289.917	0.00631	289.462	-0.0494	304.764		304.124		304.038		304.878		304.885		303.32	-0.08683
302.131	-0.07035	303.896	-0.13612	304.181	0.01399	324.325	0.0622	290.01		289.554	-0.1612	304.857		304.216	0.01214	304.131	-0.13057	304.971		304.978		303.412	-0.13775
302.224	-0.03843	303.989		304.273	-0.03014	324.417	0.02968	290.102		289.647	-0.13038	304.949		304.309	-0.01502	304.223	-0.12687	305.063		305.07		303.505	-0.14027
302.316	-0.06506	304.081		304.366	-0.00324	324.51	0.01981	290.206	0.04133	289.739	-0.06347	305.042		304.401	0.00728	304.316	-0.14453	305.156		305.163		303.597	-0.09627
302.409	-0.05078	304.174	-0.12441	304.458	-0.03224	324.602	0.01936	290.313	0.04977	289.832	-0.06634	305.134		304.494		304.408	-0.10507	305.248		305.256		303.69	-0.24983
302.501	0.00397	304.266	-0.11374	304.551		324.695	0.01877	290.405	0.12625	289.924	-0.08705	305.227		304.586		304.501		305.341		305.348		303.782	-0.12764
302.594	0.00446	304.359	-0.146	304.643		324.787	0.03583	290.498	0.04963	290.017		305.32		304.679		304.593		305.433		305.44		303.875	-0.06156
302.686	-0.01207	304.451	-0.09245	304.736		324.88	0.08395	290.59	0.09703	290.109		305.412		304.771		304.686		305.526	-0.07608	305.533	-0.10434	303.967
302.779	-0.06971	304.544		304.828		324.972		290.683	0.044	290.213	-0.04699	305.504		304.864		304.779		305.632	0.4	305.639	0.0794	304.06
302.871	-0.04169	304.636		304.921		325.065		290.775	0.02245	290.32	-0.05915	305.61	0.04101	304.956		304.871		305.724	0.31116	305.731	0.01846	304.152	-0.10412
302.964		304.729		305.013		325.158	0.09704	290.868	0.12393	290.412	0.00163	305.703	0.06143	305.049		304.964		305.817	0.21764	305.824	0.0138	304.245	-0.08039
303.056		304.821		305.106		325.25	0.08101	290.96		290.505	-0.08688	305.795	0.01063	305.142		305.056		305.909	0.25143	305.916	0.04037	304.337	-0.07431
303.149	-0.02867	304.914		305.199		325.343	0.05232	291.053		290.597	-0.01222	305.888	0.05448	305.234		305.149		306.002		306.009		304.43	-0.09804
303.241	-0.05732	305.006		305.291		325.435	0.07742	291.145	0.08039	290.69	-0.04534	305.98		305.327		305.241		306.094		306.101		304.522
303.334	-0.0694	305.099		305.384		325.528	0.06408	291.238	0.08149	290.782	-0.03906	306.073		305.419		305.334		306.187	0.21301	306.194	0.00231	304.615
303.426	0.000235614	305.191		305.476		325.63	0.07087	291.304	0.05955	290.875	-0.00989	306.165	0.04302	305.512		305.426		306.279	0.20126	306.286	-0.00655	304.707
303.519	0.01008	305.284		305.582	0.01256	325.723	0.05738	291.397	0.10092	290.967		306.258	0.03431	305.617	0.07447	305.519		306.372	0.1858	306.379	0.05634	304.8
303.611	-0.0329	305.376		305.674	-0.0182	325.815	0.09419	291.489	0.17688	291.06		306.35	0.01832	305.71	0.09204	305.624	-0.14282	306.464	0.29246	306.471	0.02798	304.892
303.704	-0.03739	305.469		305.767	-0.03439	325.908	0.11132	291.581	0.0768	291.152	-0.02097	306.443	0.02392	305.802	0.06089	305.717	-0.20127	306.557	0.39595	306.564	0.0819	304.985
303.796	-0.06922	305.575	0.01091	305.859	0.02309	326		291.674	0.06571	291.245	-0.04974	306.535	0.04578	305.895	0.05727	305.809	-0.17252	306.649	0.35818	306.656	0.02936	305.077
303.889	0.01741	305.667	0.02918	305.952	-0.04878	326.093		291.766	0.04019	291.311	-0.03617	306.628	0.03475	305.987		305.902	-0.14785	306.742	0.31219	306.749	0.02936	305.17
303.981		305.759	-0.03454	306.044		326.185		291.859	0.06603	291.404	-0.03462	306.72	-0.02113	306.08		305.995		306.834	0.23802	306.841	0.01666	305.263
304.074		305.852	0.00549	306.137	0.01258	326.278		291.951	0.07771	291.496	-0.06261	306.813	0.00816	306.173	0.04923	306.087		306.927	0.22215	306.934	0.00469	305.355
304.166	-0.01464	305.945	-0.00119	306.229	0.03234	326.371	0.12436	292.044		291.589	-0.04225	306.905	0.00411	306.265	0.05873	306.18	-0.096	307.019		307.026		305.448
304.259	-0.000613262	306.037		306.322	0.0013	326.463	0.09935	292.136	0.07397	291.681	-0.03463	306.998		306.358	0.06963	306.272	-0.11001	307.112		307.119		305.54	-0.15233
304.351	-0.02967	306.13	0.00193	306.414	0.0305	326.556	0.05434	292.229	0.03956	291.773	-0.05532	307.091		306.45	0.07729	306.365	-0.15124	307.204	0.12105	307.212	0.01895	305.646	-0.13327
304.444	0.01209	306.222	0.02958	306.507	0.0582	326.648	0.08022	292.321	0.01642	291.866	-0.03771	307.183	0.04089	306.543	0.13411	306.457	-0.17039	307.297	0.12001	307.304	0.01034	305.738	-0.12246
304.536		306.315	0.00687	306.599	0.02547	326.741	0.04	292.414	0.10541	291.958		307.276	0.05542	306.635	0.08589	306.55	-0.14415	307.39	0.14956	307.397	0.03554	305.831	-0.09822
304.629		306.407	-0.02229	306.692	0.01254	326.833	0.03282	292.506	0.16998	292.051		307.368	-0.01541	306.727	0.08877	306.642	-0.14225	307.482	0.29608	307.489	0.02547	305.923	-0.09472
304.722		306.5	0.02184	306.784	0.01602	326.926	0.0399	292.599	0.07134	292.143	-0.07688	307.461	0.02889	306.82	0.057	306.735	-0.16882	307.575	0.35741	307.582	0.02745	306.016
304.814		306.592	0.0369	306.877	0.0415	327.018		292.691	0.03267	292.236	-0.03783	307.553	0.03085	306.912	0.06228	306.827	-0.12657	307.667	0.34618	307.674	0.04201	306.108
304.907		306.685	0.02208	306.969		327.111		292.784	0.06113	292.328	-0.05126	307.646	0.03709	307.005		306.92	-0.11907	307.76	0.25652	307.767	0.06029	306.201	-0.0896
304.999		306.777	0.0501	307.062		327.203	0.08829	292.876	0.11278	292.421	-0.02548	307.738	0.04636	307.098		307.012		307.852	0.20022	307.859	0.03437	306.294	-0.07654
305.092		306.87	0.02694	307.155	-0.01449	327.296	0.06787	292.969		292.513	-0.01922	307.831	0.01927	307.19	0.07201	307.105		307.945	0.20444	307.952	0.00144	306.386	-0.10538
305.184		306.962		307.247	0.0261	327.388	0.03892	293.061		292.606	-0.11632	307.923	-0.00361	307.283	0.07465	307.197	-0.08462	308.037		308.044		306.479	-0.11161
305.277		307.055		307.34	0.02192	327.481	0.07577	293.154	0.0601	292.698	-0.14941	308.016		307.375	0.02377	307.29	-0.10956	308.13	0.13954	308.137	0.04041	306.571	-0.113
305.369		307.147	-0.00781	307.432	0.02893	327.573	0.11238	293.246	0.04744	292.791	-0.04417	308.108		307.468	0.08925	307.382	-0.14883	308.222	0.13238	308.229	0.01896	306.663	-0.11928
305.462		307.24	-0.0418	307.525	-0.04419	327.67	0.08721	293.338	0.02254	292.883	-0.05081	308.201	0.06125	307.56	0.05547	307.475	-0.17117	308.315	0.18599	308.322	-0.01124	306.756	-0.10323
305.567	0.10143	307.333	0.03465	307.617	0.05237	327.762	0.1059	293.431	0.07741	292.976		308.293	-0.01346	307.653	0.11078	307.567	-0.17133	308.407	0.22955	308.414	0.000757328	306.848	-0.1101
305.66	0.10787	307.425	-0.04023	307.71	0.03332	327.855	0.08175	293.523	0.14156	293.068		308.386	0.01663	307.745	0.08072	307.66	-0.17177	308.5	0.29966	308.507	0.06708	306.941	-0.06987
305.752	0.09548	307.518	0.03897	307.802	0.03031	327.948	0.13332	293.616	0.03175	293.161	-0.0561	308.478	0.04751	307.838	0.05609	307.752	-0.16494	308.592	0.32306	308.599	0.07902	307.034
305.845	0.06681	307.61	0.07567	307.895	0.06451	328.04		293.708	0.05041	293.253	-0.08049	308.571	0.0852	307.93	0.04825	307.845	-0.12606	310.482		310.49		307.126	-0.09395
305.937	0.07238	307.703	0.04406	307.987		328.133	0.05728	293.801	0.06609	293.346	-0.06363	310.461	-0.00702	308.023		307.937	-0.10395	310.575	-0.07313	310.582	-0.10585	307.219	-0.10185
306.03		307.795	-0.01829	308.08		328.225	0.10395	293.893	0.05808	293.438	-0.03691	310.554	-0.0382	308.115		308.03		310.667	-0.02158	310.674	-0.07048	307.311	-0.08678
306.123		307.888	-0.01387	308.172	0.02544	328.326	0.12097	293.986		293.531	-0.06585	310.646	-0.06029	308.208	0.0808	308.123		323.535	-0.04622	323.542	-0.08529	307.404	-0.14143
306.215	0.07225	307.98		308.265	0.01547	328.418		294.078		293.623	-0.08133	323.513	0.00302	308.301	0.06852	308.215	-0.08319	323.627	-0.13531	323.634	-0.10719	307.496	-0.08246
306.308	0.05434	308.073		308.358	0.03046	328.511		294.17	0.07942	293.715	-0.09556	323.606	-0.01052	308.393	0.14964	308.308	-0.06751	323.72	-0.10376	323.727	-0.09257	307.589	-0.12199
306.4	0.03568	308.165	0.0099	308.45	0.06248	328.603		294.263	0.04267	293.808	-0.03791	323.698	-0.06631	308.486	0.14206	308.4	-0.11152	323.812	-0.08535	323.819	-0.04321	307.681	-0.11856
306.493	0.09174	308.258	0.0147	308.542	0.07921	328.696		294.355	0.03144	293.9	-0.05601	323.791	0.00843	308.578	0.12071	308.493	-0.13332	323.905	-0.04416	323.912	-0.01939	307.774	-0.10393
306.585	0.11289	308.35	0.03826	310.433		328.783		294.448	0.07834	293.993		323.883	0.01554	310.468		308.585	-0.17305	323.997		324.005		307.866	-0.11474
306.678	0.12253	308.443	-0.01009	310.525		328.876		294.54	0.08099	294.085		323.976		310.561	-0.0313	310.475		324.09		324.097		307.959
306.77	0.11266	308.535	0.01813	310.618	0.12983	328.969		294.632	0.07612	294.178	-0.03301	324.068		310.653	-0.01279	310.568	-0.13772	324.182	0.01717	324.19	0.03009	308.051
306.863	0.07162	310.425		323.485	0.1762	329.061		294.725	0.00888	294.27	-0.06015	324.161	-0.01888	321.587	-0.00313	310.66	-0.04449	324.275	0.0303	324.282	-0.00654	308.144	-0.05362
306.955	0.04892	310.518		323.577	0.15696	329.154		294.817	0.000783444	294.362	-0.05453	324.254	0.03428	321.771	-0.00429	321.624	-0.01778	324.368	0.00353	324.375	-0.00898	308.237	-0.08477
307.048		310.61		323.67	0.15535	329.246		294.91	0.00738	294.455	-0.02281	324.346	0.0099	321.956	0.000975819	321.808	-0.01674	324.46	-0.00868	324.467	-0.02913	308.329	-0.05526
307.14	0.06821	323.478	-0.11505	323.762	0.17982	329.339		295.002		294.547	-0.08854	324.439	0.01512	322.14	0.00497	321.993		324.553	-0.05692	324.56	-0.0512	308.422	-0.09816
307.233	0.0639	323.57	-0.12659	323.855	0.12071	329.434	0.08568	295.095		294.64	-0.09674	324.531	-0.03966	322.325	0.00443	322.177	-0.0053	324.645	-0.03342	324.652	-0.08131	308.514	-0.07309
307.325	0.03416	323.663	-0.17634	323.948	0.10315	329.527	0.10896	295.187	-0.03119	294.732	-0.08962	324.624	0.01415	322.489	0.00244	322.361	-0.00503	324.738	-0.00778	324.745	-0.02028	308.607	-0.11114
307.418	0.0602	323.755	-0.11488	324.04		329.619	0.13064	295.28	-0.02648	294.824	-0.0813	324.716	0.06099	322.63	-0.00292	322.511	-0.01325	324.83	0.02457	324.837	-0.01109	310.497
307.511	0.12275	323.848	-0.06618	324.133	0.10624	329.831	0.11207	295.372	-0.03478	294.917	-0.06874	324.809	0.0454	322.772	-0.00356	322.653	-0.01382	324.923	-0.00985	324.93	-0.03198	310.589	-0.09501
307.603	0.12372	323.94	-0.0312	324.225	0.13559	329.924	0.12985	295.464	0.06073	295.009		324.901	0.01453	322.914	-0.00166	322.795	-0.01094	325.015		325.022		310.682	-0.0522
307.695	0.12807	324.033		324.318	0.16363	330.016		295.557	0.06637	295.102		324.994		323.056		322.936	-0.00642	325.108		325.115		321.646	-0.02399
307.788	0.13164	324.125	-0.00796	324.41	0.14495	330.109		295.649	0.03867	295.194	-0.10698	325.086		323.197	0.000652905	323.078		325.2	0.00948	325.207	0.02812	321.831	-0.01989
307.88	0.04984	324.218	-0.00885	324.503	0.12651	330.202		295.742	0.00199	295.287	-0.07828	325.179	0.03441	323.339	6.5587e-05	323.22	-0.0039	325.293	0.0222	325.3	0.04155	322.015
307.973		324.31	-0.01936	324.595	0.2495	330.298	0.11737	295.834	-0.07805	295.379	-0.0771	325.271	0.01344	323.52	-0.03489	323.362	-0.00305	325.385	-0.0116	325.392	-0.00448	322.199	-0.00898
308.066		324.403	-0.00494	324.688	0.14307	330.508	0.04232	295.927	-0.09091	295.472	-0.10236	325.364	0.01073	323.613	-0.09831	323.528	-0.21712	325.478	-0.00899	325.485	-0.04113	322.384	-0.00506
308.158	0.0454	324.496	-0.07776	324.78	0.15109	330.588	0.12351	296.019		295.564	-0.10722	325.456	0.04501	323.705	-0.0455	323.62	-0.18823	325.57	-0.03955	325.578	-0.00494	322.534	-0.00185
308.251	0.09999	324.588	-0.1335	324.873	0.14506	330.681	0.08679	296.123		295.656	-0.09217	325.549	0.01528	323.798	-0.01651	323.713	-0.16254	325.673	0.02176	325.68	-0.0507	322.675	-0.01639
308.343	0.07753	324.681	-0.09193	324.965		330.775	0.0931	296.215	-0.06275	295.749	-0.13198	325.651	0.07598	323.891	-0.0372	323.805	-0.08834	325.765	0.01016	325.772	-0.02222	322.817	-0.01436
308.436	0.08279	324.773	-0.04341	325.058		330.868	0.12486	296.308	-0.07422	295.841	-0.16884	325.744	0.07294	323.983		323.898	-0.05947	325.858	0.01857	325.865	0.00112	322.959
308.528	0.09557	324.866	-0.07798	325.15	0.12916	330.96		296.4	0.01444	295.934	-0.18263	325.836	0.02807	324.076		323.99		325.95	0.01712	325.958	0.01748	323.101
310.413		324.958	-0.000289772	325.243	0.12121	331.053		296.493	-0.03097	296.026		325.929	0.08956	324.168	0.0086	324.083		326.043		326.05		323.242	-0.00673
310.418		325.051		325.335	0.10242	331.146	0.05005	296.585	-0.02184	296.13	-0.11341	326.022		324.261	-0.0079	324.175	-0.01833	326.136		326.143		323.384	-0.0061
310.511		325.143	0.04318	325.428	0.15794	331.238	0.0572	296.678	-0.05354	296.222	-0.10064	326.114		324.353	-0.02605	324.268	-0.02472	326.228		326.235		323.549	-0.13446
310.603	0.04892	325.236	0.01346	325.521	0.15491	331.34	0.08867	296.77	-0.05571	296.315	-0.08899	326.207		324.446	-0.03442	324.36	-0.02651	326.321		326.328		323.641	-0.13758
321.505	0.03061	325.328	0.02597	325.623	0.14913	331.432	0.08366	296.863	-0.07809	296.407	-0.08364	326.299		324.538	-0.01143	324.453	-0.03763	326.413	-0.02271	326.42	-0.05564	323.734	-0.09852
321.69	0.03288	325.421	-0.00848	325.715	0.14768	331.525	0.1591	296.955	-0.07561	296.5	-0.10927	326.392	0.05628	324.631	0.00196	324.545	-0.0918	326.506	-0.00463	326.513	0.02318	323.827	-0.11149
321.874	0.02548	325.513	-0.0596	325.808	0.15727	331.617	0.15854	297.048		296.592	-0.12743	326.484	0.01586	324.723	-0.02586	324.638	-0.10688	326.598	0.01678	326.606	0.00743	323.919	-0.07341
322.059		325.616	-0.04465	325.901	0.14518	331.71	0.11646	297.14	-0.06556	296.685	-0.1134	326.577	0.0196	324.816	0.01606	324.73	-0.03743	326.691	0.05988	326.698	0.01531	324.012
322.243	0.02737	325.708	-0.03559	325.993		331.805	0.1157	297.233	-0.09262	296.777	-0.12506	326.669	0.03864	324.908	0.03793	324.823	-0.01075	326.784	0.07614	326.791	0.0147	324.104
322.421	0.02762	325.801	0.02323	326.086		331.897	0.13611	297.325	-0.05714	296.87	-0.15202	326.762	0.04222	325.001		324.915	-0.0059	326.876	0.04084	326.883	0.04703	324.197	-0.01724
322.563	0.03705	325.893	-0.00884	326.178		331.99		297.418	-0.03954	296.962		326.855	0.02893	325.093		325.008		326.969		326.976		324.289	-0.0258
322.705	0.03901	325.986		326.271		332.083		297.51	-0.05448	297.055		326.947	0.0735	325.186	-0.00516	325.101		327.061		327.068		324.382	-0.05323
322.847	0.03481	326.079		326.363		332.175		297.603	-0.18339	297.147	-0.15096	327.04		325.279	0.00978	325.193	-0.0053	327.154	0.07581	327.161	0.05769	324.474	-0.04467
322.988		326.171		326.456	0.10656	332.268		297.695	-0.23321	297.24	-0.16794	327.132	0.04524	325.371	0.0428	325.286	0.01545	327.246	0.03358	327.253	0.04166	324.567	-0.15074
323.13	0.03274	326.264		326.548	0.13997	332.36		297.788	-0.22053	297.332	-0.11122	327.225	0.02527	325.464	-0.01643	325.378	-0.00434	327.346	0.0314	327.353	0.01341	324.659	-0.09623
323.272	0.03138	326.356		326.641	0.14033	332.453		297.88	-0.12016	297.425	-0.18202	327.324	0.05164	325.556	-0.04599	325.471	-0.05445	327.438	0.0179	327.445	-0.01974	324.752	-0.0205
323.413	0.03082	326.449	-0.00565	326.734	0.14258	332.564		297.973		297.517	-0.15783	327.417	0.03182	325.659	-0.00449	325.563	0.03219	327.531	-0.00215	327.538	-0.04416	324.844	-0.06396
323.471	0.05019	326.541	0.04154	326.826	0.15508	332.657	0.19311	298.065		297.61	-0.13239	327.509	0.01676	325.751	-0.00304	325.666	-0.022	327.623	0.04647	327.63	-0.02337	324.937	-0.0367
323.563	0.07172	326.634	0.0063	326.919	0.08857	332.749	0.10834	298.158	-0.17571	297.702	-0.22655	327.602	0.01278	325.844	-0.015	325.758	-0.05762	327.713	0.05821	327.72	0.04586	325.029
323.656	0.059	326.726	0.02252	327.011		332.838	0.1511	298.25	-0.13497	297.795	-0.15909	327.691	0.05918	325.936	-0.01794	325.851	-0.00616	327.805	0.04155	327.812	-0.01206	325.122
323.748	0.0989	326.819	0.01876	327.104		332.931	0.16002	298.343		297.887	-0.09954	327.784	0.07948	326.029		325.943	0.0048	327.898	0.0691	327.905	0.01697	325.215	0.00225
323.841	0.11281	326.912	0.05251	327.196	0.12075	333.023		298.436		297.98		327.876	0.04163	326.121		326.036		327.99		327.998		325.307	-0.019
323.933	0.10292	327.004		327.289	0.16312	333.116		298.538	-0.10374	298.072		327.969		326.214		326.128		328.083		328.09		325.4	-0.01468
324.026		327.097		327.381	0.12998	333.209	0.13072	298.631	-0.12969	298.165	-0.166	328.062		326.306		326.221		328.176	0.0527	328.183	0.03689	325.492	-0.06397
324.118		327.189	0.06158	327.474	0.12874	333.301	0.16359	298.723	-0.17503	298.258	-0.13933	328.154	0.0417	326.399	0.00139	326.314		328.268	0.03748	328.275	0.05449	325.585	-0.06994
324.211	0.14386	327.282	0.0552	327.566	0.15907	333.394	0.11389	298.816	-0.17936	298.35		328.247	0.000785457	326.492	-0.03907	326.406	-0.07012	328.369		328.376		325.687	-0.03996
324.303	0.11789	327.374	0.06041	327.663	0.21785	333.494	0.09571	298.908	-0.1884	298.443		328.347	0.00296	326.584	0.01695	326.499	-0.06761	328.461		328.468		325.78	0.01689
324.396	0.08287	327.467	-0.04373	327.755	0.22465	333.586	0.08974	299.001		298.545	-0.07307	328.44		326.677	-0.03409	326.591	-0.08722	328.554		328.561		325.872	0.00329
324.488	0.08434	327.559	0.10721	327.848	0.23472	333.679	0.10797	299.093		298.638	-0.14078	328.532		326.769	-0.01412	326.684	-0.0515	328.646		328.653		325.965
324.581	0.22108	327.656	0.0934	327.94	0.17803	333.771	0.11853	299.186	-0.12702	298.73	-0.15212	328.625		326.862	0.0116	326.776	-0.04582	328.741		328.748		326.057
324.673	0.09338	327.748	0.0955	328.033		333.864	0.16729	299.279	-0.07489	298.823	-0.17453	328.717		326.954	0.0082	326.869	-0.01319	328.833		328.84		326.15
324.766	0.10191	327.841	0.01538	328.126	0.17339	333.957	0.13457	299.371	-0.11577	298.915	-0.10973	328.805		327.047		326.961		328.926		328.933		326.242
324.858	0.11835	327.933	0.06604	328.218	0.12333	334.049		299.464	-0.08571	299.008		328.897		327.139	0.01777	327.054		329.018		329.025		326.335
324.951	0.13137	328.026		328.319	0.11586	334.142	0.13405	299.556	-0.10588	299.101		328.99		327.232	0.00632	327.147	0.02816	329.111		329.118		326.428	-0.04389
325.044		328.118		328.411		334.234	0.11855	299.649	-0.16632	299.193	-0.10524	329.082		327.331	0.0152	327.239	-0.01454	329.203		329.211		326.52	-0.00349
325.136	0.09857	328.211	0.00918	328.504		334.327	0.1316	299.741	-0.1652	299.286	-0.10989	329.175		327.424	-0.000588985	327.338	-0.00879	329.296		329.303		326.613	-0.01367
325.229	0.01081	328.311	0.03216	328.596		334.423	0.15409	299.834	-0.16867	299.378	-0.09932	329.267		327.516	-0.08048	327.431	-0.10707	329.391	0.06401	329.398	0.0394	326.705	-0.00931
325.321	0.11731	328.404		328.689		334.515	0.12578	299.926	-0.18354	299.471	-0.10056	329.36		327.609	-0.08211	327.524	-0.11933	329.484	0.03111	329.491	0.03337	326.798	-0.0462
325.414	0.09161	328.497		328.776		334.607	0.28326	300.019		299.563	-0.11275	329.455	0.03925	327.698	-0.02202	327.616	-0.06446	329.576	0.11372	329.583	0.08777	326.89	0.00632
325.506	0.19947	328.589		328.869		334.7	0.14982	300.111		299.656	-0.13796	329.548	0.04787	327.791	0.02918	327.706	-0.0391	329.874	0.08184	329.881	0.09156	326.983
325.609	-0.12108	328.682		328.961		334.793	0.12613	300.204	-0.12545	299.748	-0.16298	329.64	0.05419	327.884	0.05006	327.798	0.00213	329.967		329.974		327.075
325.701	0.04305	328.769		329.054		334.885	0.12825	300.296	-0.11868	299.841	-0.15924	329.853	0.03103	327.976		327.891	0.03906	330.059		330.066		327.168	-0.02629
325.794	-0.0423	328.862		329.146		334.978		300.389	-0.09282	299.933	-0.11181	329.945	0.02663	328.069		327.983		330.152		330.159		327.26	0.01817
325.886	-0.19549	328.954		329.239		335.071		300.481	-0.08662	300.026		330.038		328.161	0.0477	328.076		330.244		330.251		327.36	-0.00618
325.979		329.047		329.332		335.163		300.574	-0.08512	300.118		330.13		328.254	0.03999	328.168	0.01158	330.341	0.04512	330.348	0.09108	327.452	-0.02827
326.071		329.139		329.427	0.18435	335.256	0.11418	300.666	-0.12178	300.211	-0.10478	330.223		328.354	0.02187	328.261	0.02973	330.631	0.088	330.638	0.0863	327.545	-0.02247
326.164		329.232		329.519	0.23492	335.348	0.17533	300.759	-0.16152	300.304	-0.08504	330.32	0.0787	328.447		328.361	-0.01194	330.723	0.06195	330.73	0.03685	327.637	-0.0048
326.257		329.324		329.612	0.24059	335.439	0.12739	300.852	-0.15548	300.396	-0.08749	330.609	0.05197	328.539		328.454		330.818	0.13106	330.825	0.12607	327.727	0.03635
326.349		329.42	0.00416	329.824	0.15933	335.532	0.18818	300.944	-0.18912	300.489	-0.07351	330.702	0.08022	328.632		328.546		330.911	0.08231	330.918	0.11276	327.82	-0.00118
326.442	0.12351	329.512	0.11278	329.917	0.16472	335.625	0.17954	301.037		300.581	-0.09056	330.797	0.0832	328.724		328.639		331.003		331.01		327.912	0.05692
326.534	0.12784	329.605	0.04025	330.009		335.717	0.14792	301.129	-0.15498	300.674	-0.13837	330.889	0.04333	328.812		328.732		331.096		331.103		328.005
326.627	0.09139	329.817	0.07315	330.102		335.81	0.14524	301.222	-0.15589	300.766	-0.16754	330.982		328.904		328.819		331.188	0.05872	331.196	0.0787	328.097
326.719	0.17485	329.91	0.102	330.194		335.902	0.10144	301.314	-0.13821	300.859	-0.1603	331.074		328.997		328.912		331.281	0.07234	331.288	0.08047	328.19	0.02545
326.812	0.14925	330.002		330.291	0.12576	335.995		301.419	-0.08971	300.951	-0.16523	331.167	0.07058	329.09		329.004		331.382	0.06434	331.39	0.10324	328.282	-0.00107
326.904	0.14908	330.095		330.501	0.22559	336.088		301.512	-0.10117	301.044		331.26	0.05813	329.182		329.097		331.475	0.05183	331.482	0.12188	328.383
326.997		330.187		330.581	0.17584	336.18	0.11412	301.604	-0.07862	301.136	-0.10978	331.361	0.03981	329.275		329.189		331.568	0.06059	331.575	0.11729	328.475
327.089		330.28	0.02168	330.673	0.24248	336.273	0.15419	301.697	-0.11583	301.229	-0.16218	331.454	0.05278	329.367	-0.00622	329.282		331.66	0.10487	331.667	0.12108	328.568
327.182	0.1411	330.574	0.09377	330.768	0.22776	336.365	0.12828	301.789	-0.1131	301.322	-0.11077	331.546	0.08213	329.462	-0.01497	329.374	0.00215	331.753	0.08508	331.76	0.14686	328.66
327.275	0.13843	330.666	0.07609	330.861	0.2004	336.464	0.1386	301.882	-0.09393	301.427	-0.06956	331.639	0.06748	329.555	-0.01378	329.47	-0.00798	331.848	0.10569	331.855	0.1523	328.755
327.367	0.10121	330.761	0.1214	330.953	0.16469	336.556	0.24888	301.974		301.519	-0.0791	331.731	0.0972	329.86	0.03293	329.562	0.05493	331.94	0.08612	331.947	0.11082	328.847
327.459	0.08813	330.854	0.09195	331.046		336.649	0.23433	302.067		301.612	-0.07303	331.826	0.01288	329.952	0.02613	329.867	0.0476	332.033		332.04		328.94
327.552	0.25977	330.946	0.05406	331.139	0.15692	336.741	0.18594	302.16	-0.11377	301.704	-0.14577	331.919	0.08628	330.045		329.959		332.125		332.132		329.033
327.649	0.13077	331.039		331.231	0.17118	336.834	0.13184	302.252	-0.09787	301.797	-0.09848	332.011		330.137		330.052		332.218		332.225		329.125
327.741	0.13991	331.131	0.06119	331.333	0.134	336.927	0.11445	302.345	-0.09647	301.889	-0.0323	332.104		330.23		330.145		332.31		332.318		329.218
327.834	0.18487	331.224	0.06241	331.425	0.18011	337.019		302.437	-0.05044	301.982		332.197		330.327	0.02379	330.237		332.403		332.41		329.31
327.926	0.17391	331.325	0.0921	331.518	0.21874	337.112		302.53	-0.04844	302.074		332.289		330.616	-0.04256	330.334	0.03233	332.496		332.614	0.14447	329.405	0.016
328.019		331.418	0.13237	331.61	0.20405	337.204	0.13425	302.622	-0.06294	302.167	-0.07303	332.382		330.709	0.02	330.624	0.0502	332.607	0.11709	332.706	0.14786	329.498	0.0102
328.111		331.511	0.10582	331.703	0.2399	337.297	0.09795	302.715	-0.0915	302.259	-0.10284	332.474		330.804	0.01378	330.716	0.0968	332.699	0.07356	332.803	0.13547	329.591	0.07852
328.204	0.1071	331.603	0.12866	331.798	0.21734	337.389	0.17124	302.807	-0.14458	302.352	-0.0645	332.585	0.03763	330.896	0.00907	330.811	0.09056	332.795	0.0615	332.895	0.12455	329.888	0.02294
328.304	0.11104	331.696	0.12891	331.89	0.17199	337.478	0.16278	302.9	-0.06262	302.444	-0.05509	332.678	0.06568	330.989		330.904	0.0408	332.888	0.08595	332.988		329.981
328.397		331.791	0.06568	331.983		337.571	0.22346	302.992		302.537	-0.06047	332.774	0.08327	331.082		330.996		332.981		333.08		330.073
328.489		331.883	0.06694	332.075		337.663	0.21247	303.085		302.629	-0.04954	332.867	0.0739	331.174	0.03891	331.089		333.073		333.173	0.10866	330.166
328.582		331.976		332.168		337.756	0.18557	303.177	-0.08386	302.722	-0.07241	332.959		331.267	0.04468	331.181	0.0405	333.166	0.06938	333.265	0.14129	330.259
328.675		332.068		332.261		337.848	0.1057	303.27	-0.0914	302.814	-0.11317	333.052		331.368	0.01461	331.274	0.05529	333.258	0.09294	333.358	0.09332	330.355	0.00789
328.762		332.161		332.353		337.941	0.09053	303.362	-0.14462	302.907	-0.10147	333.144	0.05704	331.461	0.01185	331.375	0.04697	333.351	0.10446	333.458	0.10678	330.645	0.06665
328.855		332.253		332.446		338.034		303.455	-0.12879	302.999		333.237	0.04219	331.553	0.04299	331.468	0.02748	333.451	0.11698	333.551	0.09287	330.738	0.06102
328.947		332.346		332.557		338.126	0.10755	303.547	-0.08336	303.092		333.33	0.05526	331.646	0.05778	331.56	0.09363	333.543	0.09453	333.643	0.13613	330.832	0.03302
329.04		332.439		332.649	0.23147	338.219	0.09204	303.64	-0.05148	303.185	-0.07084	333.43	0.05488	331.738	0.00545	331.653	0.09654	333.636	0.12562	333.736	0.1087	330.925	0.03804
329.132		332.55		332.742	0.31822	338.311	0.06545	303.732	-0.09786	303.277	-0.0628	333.522	0.01822	331.833	0.00557	331.746	0.1172	333.729	0.10427	333.828	0.11911	331.018
329.225		332.642	0.16861	332.831	0.24908	338.404	0.20139	303.825	-0.07049	303.37	-0.0981	333.615	0.04477	331.926	0.08687	331.841	0.13601	333.821	0.07204	333.921	0.1477	331.11
329.317		332.735	0.14665	332.924	0.19349	338.497	0.20977	303.917	-0.07843	303.462	-0.11832	333.707	0.00509	332.018		331.933	0.05553	333.914	0.10001	334.014		331.203	-0.00625
329.413	0.09327	332.824	0.09661	333.016		338.597		304.01		303.555	-0.0647	333.8	0.04146	332.111		332.026		334.006		334.106		331.295	0.03669
329.505	0.16387	332.917	0.09724	333.109		338.69		304.102		303.647	-0.07047	333.892	0.03044	332.204		332.118		334.099		334.199	0.11858	331.397	0.05543
329.598	0.21978	333.009		333.201	0.18858	338.782		304.195	-0.068	303.74	-0.05164	333.985		332.296		332.211		334.192	0.18042	334.291	0.18893	331.489	0.08302
329.795	0.14698	333.102		333.294	0.14412	338.875		304.287	-0.07684	303.832	-0.09979	334.078		332.389		332.303		334.284	0.14604	334.384	0.16575	331.582	0.06559
329.81	0.14186	333.194	0.12059	333.387	0.10007	338.968		304.38	-0.05071	303.925	-0.08487	334.17	0.01362	332.481		332.396		334.377	0.08651	334.473	0.07629	331.674	0.07451
329.902	0.14784	333.287	0.13506	333.487	0.19477	339.06		304.472		304.017		334.263	0.02899	332.593	0.04371	332.488		334.465	0.12622	334.565	0.14208	331.767	0.04808
329.995		333.379	0.06932	333.579	0.16878	339.153		304.565		304.11		334.355	0.04632	332.685	0.05077	332.6	0.11428	334.558	0.16126	334.657	0.15997	331.862	0.01972
330.088		333.479	0.08813	333.672	0.1447	339.245		304.658		304.202	-0.03618	334.444	0.03602	332.781	0.00681	332.692	0.04397	334.65	0.11759	334.75	0.15533	331.954	0.03726
330.18		333.572	0.01345	333.764	0.16323	339.338	0.14394	304.75		304.295	-0.072	334.537	0.03024	332.874	0.06404	332.788	0.11088	334.743	0.15453	334.842	0.17236	332.047
330.273		333.665	0.04925	333.857	0.16488	339.431	0.15344	304.842		304.387	-0.0233	334.629	0.02428	332.966		332.881	0.10602	334.835	0.12306	334.935	0.17266	332.14
330.566	0.14009	333.757	0.11486	333.949	0.1182	339.523	0.18231	304.935		304.48		334.721	0.05393	333.059		332.973		334.928	0.11869	335.028		332.232
330.659	0.17597	333.85	0.13013	334.042		339.616	0.2637	305.028		304.572		334.814	0.03209	333.152	0.04243	333.066		335.021		335.12		332.325
330.754	0.19514	333.942	0.05707	334.135	0.14928	339.708	0.17932	305.12		304.665		334.907	0.0542	333.244	0.04433	333.159	0.06249	335.113		335.213		332.417
330.846	0.15396	334.035		334.227	0.17124	339.801	0.15376	305.213		304.757		334.999		333.337	0.04765	333.251	0.06426	335.206		335.306	0.17022	332.621	0.11379
330.939	0.17338	334.128	0.09928	334.32	0.14559	339.894	0.12137	305.305		304.85		335.092		333.437	0.02454	333.344	0.08116	335.298	0.10603	335.404	0.17626	332.714	0.06497
331.032		334.22	0.08598	334.416	0.17921	339.986		305.398		304.942		335.184		333.529	0.03503	333.444	0.06754	335.397	0.09147	335.496	0.16297	332.81	0.05865
331.124		334.313	0.09928	334.508	0.2297	340.079		305.49		305.035		335.277	0.04188	333.622	0.04208	333.536	0.01164	335.489	0.12232	335.589	0.20476	332.902	0.05877
331.217	0.15116	334.408	0.1519	334.6	0.20716	340.171	0.15422	305.596	0.0487	305.127		335.37	0.03109	333.714	0.01695	333.629	0.06373	335.582	0.10491	335.681	0.15626	332.995
331.309	0.13929	334.501	0.10553	334.693	0.23542	340.264	0.13414	305.688	0.03135	305.22		335.461	0.04726	333.807	0.01285	333.721	0.09321	335.674	0.08477	335.774	0.19691	333.087
331.318	0.12838	334.593	0.16721	334.785	0.1901	340.357	0.10587	305.781	0.01364	305.312		335.553	0.05195	333.9	0.02709	333.814	0.09922	335.767	0.11565	335.867	0.1888	333.18	0.03864
331.411	0.14061	334.686	0.1236	334.878	0.21519	340.458	0.1583	305.873	-0.0523	305.405		335.646	0.08276	333.992		333.907	0.09057	335.859	0.14389	335.959		333.273	0.0563
331.503	0.14638	334.778	0.12222	334.971		340.551	0.20504	305.966		305.497		335.739	0.07552	334.085		333.999		335.952	0.1347	336.052		333.365	0.07074
331.596	0.11802	334.871	0.13416	335.063		340.643	0.23623	306.059		305.603	-0.07784	335.831	0.05069	334.177	0.02715	334.092		336.045		336.144	0.19203	333.465	0.04317
331.689	0.12916	334.964		335.156		340.736	0.22192	306.151	0.0537	305.695	-0.06	335.924	0.05051	334.27	0.03837	334.184	0.1062	336.137	0.09587	336.237	0.2152	333.558	0.00155
331.783	0.18242	335.056		335.249	0.14276	340.829	0.11525	306.244	0.01994	305.788	-0.08379	336.016		334.362	0.03229	334.277	0.09965	336.23	0.11562	336.33	0.18627	333.65	0.0732
331.876	0.16839	335.149		335.341	0.15305	340.921	0.11161	306.336	0.03461	305.881	-0.08392	336.109		334.451	0.03825	334.37	0.09401	336.323	0.12088	336.422	0.25012	333.743	0.05776
331.969		335.241	0.10177	335.432	0.16958	341.014		306.429	0.03988	305.973		336.201	0.05289	334.544	-0.01221	334.458	0.11358	336.415	0.16361	336.513	0.24258	333.835	0.04738
332.061		335.334	0.14477	335.525	0.27293	341.106		306.521	0.03818	306.066		336.294	0.06713	334.636	0.01787	334.551	-0.14674	336.506	0.16307	336.606	0.24803	333.928	0.05705
332.154		335.425	0.16714	335.617	0.25293	341.199	0.12527	306.614	0.08231	306.158	-0.02963	336.387	0.02079	334.728	0.0226	334.643	0.10112	336.599	0.06184	336.699	0.21156	334.021
332.246		335.518	0.13555	335.71	0.2143	341.292	0.06806	306.706	0.01826	306.251	-0.06461	336.485	0.05583	334.821	0.0338	334.736	0.08676	336.692	0.05121	336.791	0.22005	334.113
332.339		335.61	0.16962	335.803	0.25456	341.384	0.1564	306.799	0.0313	306.343	-0.05582	336.577	0.10005	334.914	0.033	334.828	0.07287	336.784	0.09822	336.884	0.14023	334.206	0.06314
332.431		335.703	0.13551	335.895	0.22314	341.477	0.08766	306.891	0.00817	306.436	-0.09421	336.67	0.08562	335.006		334.921	0.04775	336.877	0.08385	336.976		334.298	0.04697
332.543		335.795	0.05412	335.988		341.569	0.27699	306.984		306.528	-0.06895	336.763	0.08752	335.099		335.014		336.969		337.069		334.391	0.04563
332.635	0.24927	335.888	0.11045	336.08		341.662	0.21682	307.076		306.621	-0.06977	336.855	0.05269	335.192		335.106		337.062		337.162	0.20786	334.48	0.00972
332.728	0.25651	335.981		336.173	0.21112	341.754	0.18683	307.169	0.03358	306.713	-0.07796	336.948	0.1189	335.284	0.0366	335.199		337.155	0.10937	337.254	0.17268	334.572	0.02929
332.817	0.24965	336.073		336.266	0.19995	341.847	0.12839	307.261	0.03415	306.806	-0.10142	337.041		335.377	0.04634	335.291	0.14208	337.247	0.09446	337.347	0.17745	334.664	0.04863
332.909	0.15912	336.166	0.15321	336.358	0.15982	341.94	0.15321	307.354	0.01262	306.898	-0.04268	337.133	0.086	335.468	0.07757	335.39	0.13937	337.34	0.12962	337.439	0.20427	334.757	0.04823
333.002		336.258	0.12113	336.456	0.23252	342.032		307.447	0.00914	306.991		337.226	0.0377	335.561	0.04504	335.482	0.13797	337.432	0.07062	337.528	0.17147	334.85	0.07695
333.095		336.351	0.19109	336.549	0.30538	342.125		307.539	0.03544	307.083		337.318	0.03686	335.653	0.03518	335.575	0.15923	337.521	-0.05997	337.621	0.21849	334.942	0.1134
333.187	0.23072	336.444	0.17497	336.642	0.31887	342.217	0.18443	307.631	0.0414	307.176	-0.05228	337.411	0.11762	335.746	0.05098	335.667	0.11807	337.614	0.0952	337.713	0.13055	335.035
333.28	0.19266	336.535	0.23982	336.734	0.27949	342.31	0.09362	307.724	0.00912	307.269	-0.0149	337.5	0.11623	335.838	0.0264	335.76	0.13956	337.706	0.11244	337.806	0.2097	335.128
333.372	0.12936	336.627	0.2986	336.827	0.18719	342.402	0.17412	307.816	0.0056	307.361	-0.04571	337.592	0.07874	335.931	0.07388	335.852	0.05497	337.799	0.08549	337.898	0.18502	335.22
333.472	0.08032	336.72	0.08603	336.919	0.17191	342.495	0.15152	307.909	0.03185	307.454	-0.10502	337.685	0.04112	336.023		335.945	0.1211	337.891	0.09158	337.991		335.313	0.09765
333.565	0.08044	336.813	0.0448	337.012		342.593	0.21486	308.002		307.546	-0.03583	337.777	0.00966	336.116		336.038		337.984		338.084		335.411	0.0368
333.657	0.12941	336.905	0.10135	337.105		342.685	0.13949	308.094		307.639	-0.04578	337.87	0.07621	336.209	0.02615	336.13	0.09352	338.076		338.176	0.14744	335.504	0.09794
333.75	0.1411	336.998		337.197	0.1766	342.778	0.12949	308.187	-0.0041	307.731	-0.10468	337.962		336.301	0.02345	336.223	0.08122	338.169	0.01943	338.269	0.15594	335.596	0.0528
333.843	0.18899	337.091		337.29	0.19551	342.87	0.16189	308.279	0.000757428	307.824	-0.08217	338.055		336.394	0.06226	336.315	0.14051	338.262	0.0709	338.361	0.14453	335.689	0.03587
333.935	0.17393	337.183	0.13879	337.382	0.19359	342.963		308.372	0.00796	307.916	-0.03158	338.148	0.04936	336.492	0.0146	336.408	0.14257	338.354	0.10188	338.454	0.18378	335.781	0.05742
334.028		337.276	0.15038	337.471	0.21707	343.056		308.464	0.01184	308.009		338.24	0.03312	336.585	0.03349	336.499	0.16248	338.447	0.07636	338.546	0.19866	335.874	0.11601
334.12		337.368	0.13477	337.564	0.2612	343.148	0.14109	308.557	0.03364	308.101		338.333	0.0384	336.677	0.05352	336.592	0.19479	338.539		338.647		335.966
334.213	0.14858	337.464	0.1709	337.656	0.32572	343.241	0.11792	310.447	0.02321	308.194	-0.03431	338.425	0.05079	336.77	0.04196	336.684	0.16219	338.64		338.74		336.059
334.306	0.18654	337.557	0.20717	337.749	0.20543	343.333	0.12704	310.539		308.286	-0.01013	338.518	0.02786	336.862	0.05702	336.777	0.12503	338.733		338.832		336.152	0.0778
334.401	0.15206	337.649	0.14544	337.841	0.14972	343.426		310.632	-0.02044	308.379	-0.02548	338.619		336.955	0.04376	336.87	0.11791	338.825		338.925		336.244	0.05091
334.494	0.16689	337.742	0.14039	337.934	0.16591	343.519		323.499	0.05695	308.471	-0.03496	338.711		337.048		336.962		338.918		339.018		336.337	0.0788
334.586	0.27705	337.834	0.06405	338.027		343.611		323.592	-0.02569	308.564	-0.05081	338.804		337.14	0.02224	337.055		339.01		339.11		336.429	0.10041
334.679	0.2148	337.927	0.12089	338.119		343.704		323.684	-0.02469	310.454	0.00893	338.896		337.233	0.03694	337.147	0.1168	339.103		339.203		336.521	0.12904
334.771	0.19213	338.019		338.212	0.17839	343.796	0.26531	323.777	-0.01678	310.546		338.989		337.325	-0.0107	337.24	0.10925	339.196		339.295		336.613	0.12502
334.864	0.21023	338.112		338.304	0.14253	343.889	0.18568	323.869	0.06197	310.639	-0.05632	339.082		337.418	0.02852	337.332	0.09495	339.288		339.388	0.15886	336.706	0.13669
334.956	0.20336	338.205	0.07282	338.397	0.19787	343.982		323.962		321.565	-0.00229	339.174		337.507	0.0467	337.425	0.10683	339.381	0.05829	339.48	0.18122	336.798	0.09734
335.049		338.297	0.1435	338.489	0.28252	344.074		324.054		321.749	-0.00743	339.267		337.599	-0.01217	337.514	0.13595	339.473	0.11325	339.573	0.19115	336.891	0.05407
335.142		338.39	0.11134	338.59		344.167	0.13688	324.147	0.03295	321.933	0.00084793	339.359	0.05327	337.692	0.00442	337.606	0.17621	339.566	0.12807	339.666	0.25837	336.984
335.234		338.482	0.18687	338.683		344.259	0.14739	324.239	0.07462	322.118		339.452	0.09286	337.784	0.00765	337.699	0.1352	339.658	0.15613	339.758	0.1886	337.076
335.327	0.17409	338.583		338.775		344.352	0.12228	324.332	0.05473	322.302	0.00709	339.545	0.06069	337.877	0.0326	337.791	0.11271	339.751	0.11469	339.851	0.21571	337.169	0.07782
335.418	0.22488	338.676		338.868		344.445	0.00892	324.424	0.05893	322.466	0.00715	339.637	0.10287	337.97		337.884	0.05957	339.844	0.09599	339.943	0.19427	337.261	0.0459
335.511	0.21654	338.768		338.96		344.537	0.25926	324.517	-0.00157	322.608	0.00423	339.73	0.07673	338.062		337.977		339.936	0.0563	340.036		337.354	0.1073
335.603	0.31501	338.861		339.053		344.63	0.22158	324.609	0.08664	322.75	-0.00103	339.822	0.06942	338.155	-0.01816	338.069		340.029		340.129	0.19647	337.446	0.0599
335.696	0.29359	338.953		339.146		344.722	0.19811	324.702	0.04925	322.891	0.00651	339.915	0.04283	338.247	0.03669	338.162	0.1102	340.122		340.221	0.1945	337.535	0.08036
335.788	0.23526	339.046		339.238		344.815	0.17363	324.794	0.07886	323.033		340.008		338.34	0.03254	338.254	0.17821	340.214	0.13121	340.314	0.18965	337.628	0.07103
335.881	0.24081	339.139		339.331	0.16129	344.908	0.14734	324.887	0.1055	323.175	0.00858	340.1		338.432	0.02841	338.347	0.11369	340.307	0.10979	340.407	0.21951	337.72	0.04633
335.974		339.231		339.423	0.25484	345		324.979		323.317	0.00854	340.193	0.07467	338.525	-0.000870904	338.44	0.16473	340.399	0.13297	340.508	0.22558	337.813	0.09273
336.066		339.324	0.10553	339.516	0.30618	345.093		325.072		323.458	0.00765	340.285	0.0328	338.626		338.532	0.12263	340.501	0.16194	340.601	0.22385	337.906	0.05578
336.159	0.17478	339.416	0.16225	339.609	0.36308	345.185	0.1419	325.165	0.07526	323.506	-0.0573	340.378	0.06458	338.718		338.633		340.594	0.13059	340.693	0.26619	337.998
336.251	0.21795	339.509	0.23946	339.701	0.39737	345.278	0.10902	325.257	0.07194	323.599	-0.08977	340.48	0.06473	338.811		338.726		340.686	0.13326	340.786	0.22148	338.091
336.344	0.1614	339.601	0.26274	339.794	0.24568	345.371	0.17455	325.35	0.08682	323.691	-0.03433	340.572	0.0022	338.904		338.818		340.779	0.12524	340.879	0.24234	338.183	0.0869
336.436	0.26055	339.694	0.18366	339.886	0.17819	345.469	0.1578	325.442	0.10283	323.784	0.00328	340.665	0.044	338.996		338.911		340.871	0.11131	340.971		338.276	0.05659
336.528	0.28154	339.787	0.13674	339.979		345.562	0.22614	325.535	0.03665	323.876	-0.03272	340.757	0.0406	339.089		339.003		340.964		341.064		338.368	0.06444
336.62	0.30618	339.879	0.13048	340.072		345.655	0.23448	325.637	0.04395	323.969		340.85	0.06432	339.181		339.096		341.057		341.156	0.22772	338.461	0.11888
336.713	0.28451	339.972		340.164	0.20036	345.747	0.17141	325.73	0.02969	324.061		340.943	0.04819	339.274		339.188		341.149	0.0866	341.249	0.23944	338.554	0.08925
336.805	0.20402	340.065		340.257	0.20847	345.84	0.12179	325.822	0.04272	324.154	0.02038	341.035		339.366	0.03242	339.281		341.242	0.03026	341.341	0.20616	338.654
336.898	0.18266	340.157	0.1532	340.35	0.15858	345.932	0.14622	325.915	0.07432	324.246	0.05795	341.128	0.05003	339.459	0.04084	339.374	0.09819	341.334	0.13795	341.434	0.20699	338.747
336.991		340.25	0.11072	340.451	0.31922	346.025		326.007		324.339	0.01661	341.22	0.04527	339.552	0.04325	339.466	0.16789	341.427	0.08905	341.527	0.25205	338.839
337.083		340.342	0.13891	340.544	0.24637	346.117		326.1		324.431	0.000844268	341.313	0.01275	339.644	0.06418	339.559	0.22711	341.519	0.15329	341.619	0.16162	338.932
337.176	0.19568	340.444	0.17312	340.636	0.25847	346.21	0.1202	326.193		324.524	-0.00351	341.405	0.09963	339.737	0.01494	339.651	0.20446	341.612	0.05305	341.712	0.1973	339.025
337.268	0.2053	340.537	0.22735	340.729	0.25386	346.265	0.11997	326.285		324.616	0.02423	341.498	0.06397	339.829	0.01269	339.744	0.14043	341.705	0.07726	341.804	0.17908	339.117
337.361	0.15021	340.629	0.21738	340.822	0.24823	346.287	1.21798	326.378	0.09035	324.709	0.01063	341.591	0.05876	339.922	-0.00763	339.837	0.17416	341.797	0.13601	341.897	0.17875	339.21
337.457	0.24381	340.722	0.1332	340.914	0.16836	346.308	1.17038	326.47	0.09464	324.802	0.03143	341.683	0.06636	340.015		339.929	0.10306	341.89	0.12	341.989		339.302
337.549	-0.17935	340.814	0.15734	341.007		346.33	1.07381	326.563	0.05794	324.894	0.00431	341.776	0.0323	340.107		340.022		341.982		342.082		339.395	0.07795
337.642	0.33195	340.907	0.13936	341.099		346.358	1.07249	326.655	0.0719	324.987		341.868	0.08393	340.2	0.05853	340.114		342.075		342.175	0.16787	339.488	0.09977
337.735	0.24941	341		341.192	0.2043	346.379	0.91024	326.748	0.07324	325.079		341.961		340.293	0.03961	340.207	0.12889	342.167	0.08422	342.267	0.14811	339.58	0.10528
337.827	0.2473	341.092		341.284	0.18885	346.401	0.70843	326.84	0.08758	325.172	0.04021	342.053		340.385	0.06219	340.3	0.12549	342.26	0.07472	342.36	0.18964	339.673	0.14743
337.92	0.15619	341.185	0.14099	341.377	0.19541	346.422	0.60498	326.933	0.07073	325.264	0.03104	342.146	0.05047	340.487	0.01092	340.392	0.1485	342.353	0.1026	342.452	0.17165	339.765	0.05863
338.012		341.277	0.10959	341.47	0.2452	346.451	0.48642	327.025		325.357	0.02997	342.239	0.06267	340.579	0.08505	340.494	0.19246	342.445	0.03882	342.545	0.23593	339.858	0.05818
338.105		341.37	0.11233	341.562	0.32387	346.461	0.42704	327.118		325.449	0.02583	342.331	0.07398	340.672	-0.00354	340.586	0.19043	342.538	0.03532	342.643	0.23396	339.951	0.08657
338.197	0.15589	341.462	0.15509	341.655	0.31441	346.554	-0.06404	327.211	0.08688	325.542	0.02331	342.424	0.03175	340.765	0.00457	340.679	0.18293	342.635	0.03557	342.735	0.21462	340.043
338.29	0.17393	341.555	0.24564	341.747	0.23018	346.647	-0.20675	327.303	0.05994	325.644	0.02882	342.516	0.05067	340.857	0.02384	340.772	0.07536	342.728	0.12167	342.828	0.16134	340.136	0.06535
338.383	0.20351	341.648	0.17712	341.84	0.2679	346.739	-0.24669	327.395	0.06679	325.737	0.09086	342.614	0.09462	340.95	0.02093	340.864	0.11045	342.821	0.10108	342.92	0.19337	340.228	0.10222
338.475	0.23208	341.74	0.22869	341.932	0.20401	346.832	-0.23199	327.488	0.11739	325.829	0.03358	342.707	0.03287	341.042		340.957	0.1451	342.913	0.11042	343.013		340.321	0.10727
338.576		341.833	0.08834	342.025		346.925	-0.20277	327.581	0.12437	325.922	0.07092	342.799	0.09807	341.135	0.04156	341.049		343.006		343.105		340.414	0.12312
338.669		341.925	0.14413	342.118		347.017		327.677	0.08731	326.014		342.892	0.0632	341.227	0.04046	341.142	0.11247	343.098		343.198	0.1921	340.515	0.10728
338.761		342.018		342.21	0.21363	347.11		327.77	0.05912	326.107		342.984		341.32	0.03616	341.235	0.11215	343.191	0.08162	343.291	0.16716	340.608	0.09191
338.854		342.11		342.303	0.18701	347.202	-0.2024	327.862	0.13539	326.2		343.077		341.413	0.06966	341.327	0.10177	343.284	0.05555	343.383	0.17752	340.7	0.11212
338.946		342.203	0.09227	342.395	0.17383	347.295	-0.17248	327.955	0.08751	326.292		343.169	0.02769	341.505	0.00913	341.42	0.13351	343.376	0.05386	343.476		340.793	0.08569
339.039		342.296	0.11993	342.488	0.19418	347.415	-0.23789	328.047		326.385	0.055	343.262	0.06529	341.598	0.06859	341.512	0.25768	343.469		343.568		340.886	0.08833
339.131		342.388	0.12213	342.585	0.26681	347.508	-0.2503	328.14	0.09366	326.477	0.07294	343.355	0.06248	341.69	0.01574	341.605	0.22671	343.561		343.661		340.978
339.224		342.481	0.12728	342.678	0.1743	347.6	-0.23963	328.232	0.09911	326.57	0.06708	343.447		341.783	0.03264	341.697	0.23079	343.654	0.15928	343.754	0.35306	341.071
339.317		342.578	0.16822	342.771	0.19123	347.693	-0.33147	328.333	0.10324	326.662	-0.0151	343.54		341.875	0.0781	341.79	0.15605	343.747	-0.08491	343.846	0.31606	341.163	0.06567
339.409	0.17177	342.671	0.14468	342.863	0.19322	347.785	-0.24729	328.425		326.755	0.0695	343.632		341.968		341.883	0.16109	343.839	0.20532	343.939	0.28911	341.256	0.06802
339.502	0.2781	342.764	0.10269	342.956	0.1621	347.878	-0.21201	328.518		326.847	0.06196	343.725	0.04002	342.061		341.975		343.932	0.03501	344.031		341.349	0.10712
339.594	0.30749	342.856	0.0904	343.048		347.971		328.611		326.94	0.02784	343.818	0.19308	342.153	0.04636	342.068		344.024		344.124		341.441	0.06245
339.687	0.39999	342.949	0.14727	343.141	0.14973	348.063		328.703		327.033		343.91	0.07769	342.246	0.05247	342.16	0.14749	344.117		344.217	0.20272	341.534	0.07409
339.78	0.2443	343.041		343.234	0.15102	348.156	-0.14411	328.791		327.125		344.003		342.338	0.02932	342.253	0.08392	344.21	0.04776	344.309	0.16028	341.626	0.16046
339.872	0.21081	343.134	0.04632	343.326	0.17202	348.248	-0.17249	328.883		327.218	0.05442	344.095		342.431	0.03172	342.345	0.14855	344.302	0.00133	344.402		341.719	0.10545
339.965		343.226	0.11895	343.419	-0.294	348.341	-0.23025	328.976		327.317	0.07227	344.188	0.02596	342.523	0.03627	342.438	0.14249	344.395	0.05621	344.494	0.19515	341.811	0.05247
340.057		343.319	0.11593	343.511	0.09178	348.434	-0.16948	329.068		327.41	0.03855	344.281	0.05745	342.621	0.01215	342.531	0.18433	344.487	0.06246	344.587	0.37249	341.904	0.1072
340.15	0.15475	343.412	0.08922	343.604		348.526	0.03408	329.161		327.502	0.07514	344.373	0.03269	342.714	0.0449	342.628	0.15099	344.58	0.09043	344.68	0.25629	341.997
340.243	0.18545	343.504		343.697	0.48333	348.619	-0.12233	329.253		327.595	0.0638	344.466	0.04521	342.806	0.047	342.721	0.16224	344.672	0.05602	344.772	0.1845	342.089
340.335	0.19198	343.597		343.789	0.45445	348.711	-0.25613	329.346		327.684	0.05125	344.558	0.10548	342.899	0.01684	342.813	0.15822	344.765	0.02931	344.865	0.16918	342.182	0.1293
340.437	0.20671	343.689		343.882	0.37112	348.804	-0.20012	329.441	0.0688	327.777	0.04189	344.651	0.08811	342.991		342.906	0.14933	344.858	0.06694	344.957	0.14844	342.274	0.09392
340.529	0.28171	343.782	0.08878	343.974		348.897	-0.13507	329.534	0.10182	327.869	0.0483	344.744	0.04393	343.084		342.999		344.95	0.08044	345.05		342.367	0.09448
340.622	0.27362	343.875	0.19475	344.067		348.989		329.626	0.18458	327.962		344.836	0.0381	343.177	0.00541	343.091		345.043		345.143	0.1819	342.459	0.10839
340.715	0.31016	343.967		344.16	0.16481	349.082		329.838	0.07112	328.054		344.929	0.06638	343.269	0.03177	343.184	0.14678	345.135	0.09751	345.235	0.17809	342.552	0.14099
340.807	0.19686	344.06		344.252	0.11707	349.174	-0.13033	329.931	0.08186	328.147	0.06254	345.021		343.362	0.02296	343.276	0.13649	345.228	0.12363	345.328	0.17424	342.65	0.076
340.9	0.20964	344.152	0.17262	344.345	0.13732	349.267	-0.10266	330.024		328.239	0.0762	345.114		343.454		343.369	0.13211	345.321	0.06613	345.42	0.28025	342.742	0.0799
340.992		344.245	0.13434	344.437	0.10168	349.36	-0.13187	330.116		328.34	0.06952	345.207	0.02996	343.547		343.462		345.413	0.12381	345.519	0.29007	342.835	0.06779
341.085		344.338	0.10051	344.53	0.3756	349.452	-0.18576	330.209		328.433		345.299	0.06965	343.64		343.554		345.512	0.09469	345.612	0.28158	342.927	0.0574
341.178	0.15088	344.43		344.623	0.27864	349.545	-0.10077	330.306	0.10476	328.525		345.392	0.04016	343.732	-0.00829	343.647		345.605	0.07071	345.705	0.24762	343.02
341.27	0.1599	344.523		344.715	0.22949	349.642	-0.12058	330.515	0.12217	328.618		345.491	0.1007	343.825	0.13974	343.739	0.14942	345.697	0.04167	345.797	0.21582	343.113
341.363	0.16722	344.615	0.28405	344.808	0.14888	349.735	-0.21186	330.595	0.12062	328.71		345.583	0.01306	343.917	0.04021	343.832	0.24284	345.79	0.06587	345.89	0.17225	343.205	0.06801
341.455	0.18511	344.708	0.23683	344.9	0.12961	349.827	-0.1262	330.688	0.10252	328.798		345.676	0.05997	344.01		343.925	0.14615	345.883	0.05718	345.982		343.298	0.04996
341.548	0.32137	344.801	0.12965	344.993		349.92	-0.11479	330.782	0.15939	328.89		345.769	0.05678	344.103		344.017		345.975		346.075		343.39	0.0744
341.64	0.33333	344.893	0.13604	345.086		350.013		330.875	0.06782	328.983		345.861	0.02413	344.195	0.00133	344.11		346.068		346.167	0.15066	343.483	-0.04602
341.733	0.2451	344.986		345.178	0.16971	350.105		330.968		329.075		345.954	0.0778	344.288	0.07749	344.202	0.18266	346.16	0.0769	346.533	0.46839	343.576
341.826	0.22187	345.078		345.271	0.10612	350.198		331.06		329.168		346.046		344.38	0.04424	344.295	0.13146	346.526	0.06542	346.625	0.13429	343.668
341.918	0.18615	345.171	0.11823	345.363	0.16087	350.291		331.153	0.09209	329.26		346.139	0.03616	344.473	-0.13711	344.388	0.10976	346.618	0.08059	346.718	-0.08038	343.761	0.0893
342.011		345.264	0.11717	345.462	0.20752	350.383	-0.13429	331.245	0.15759	329.353		346.231	0.05927	344.566	-0.01611	344.48	-0.00412	346.711	-0.11283	346.811	-0.1014	343.853	0.07607
342.103		345.356	0.10212	345.555	0.30764	350.476	-0.18968	331.347	0.10166	329.448	0.0634	346.483	0.15813	344.658	0.04913	344.573	0.29629	346.804	-0.1878	346.903	-0.19142	343.946	0.0477
342.196	0.1859	345.455	0.17999	345.647	0.29053	350.568	-0.14413	331.439	0.14735	329.541	0.07084	346.576	0.51629	344.751	0.02407	344.665	0.35051	346.896	-0.1425	346.996		344.039
342.288	0.13957	345.548	0.19745	345.74	0.17067	350.661	-0.16045	331.532	0.1276	329.633	0.10899	346.668	0.04909	344.843	0.02802	344.758	0.25671	346.989		347.089		344.131	0.07866
342.381	0.16134	345.64	0.27146	345.833	0.1694	350.753	-0.17891	331.625	0.14831	329.846	0.05885	346.761	-0.01505	344.936	-0.00899	344.851	0.15613	347.081		347.181	-0.18315	344.224	0.05746
342.474	0.21802	345.733	0.12354	345.925	0.17979	350.846	-0.10347	331.717	0.14914	329.938	0.05912	346.853	-0.08319	345.029		344.943	0.18961	347.174	-0.15328	347.274	-0.13378	344.316	0.07508
342.571	0.23714	345.825	0.0881	346.018		350.939	-0.06448	331.812	0.09844	330.031		346.946	-0.06469	345.121		345.036		347.267	-0.22038	347.366	-0.22302	344.409
342.664	0.18964	345.918	0.16232	346.11		351.031		331.905	0.12706	330.123		347.039		345.214	-0.00494	345.128	0.12977	347.359	-0.2608	347.465	-0.24752	344.502	0.0628
342.756	0.2278	346.011		346.203	0.16883	351.124		331.997		330.216		347.131		345.306	0.05124	345.221	0.18943	347.458	-0.29466	347.558	-0.27797	344.594	0.12159
342.849	0.23587	346.103		346.497	0.8525	351.216	-0.03722	332.09		330.313	0.06787	347.224	-0.10186	345.399	0.04359	345.314	0.22341	347.55	-0.22911	347.65	-0.3032	344.687	0.08317
342.942	0.14531	346.196	0.18719	346.59	0.22403	351.309	-0.05178	332.182		330.602	0.09497	347.316	-0.099	345.498	0.07326	345.406	0.19356	347.643	-0.28552	347.743	-0.29026	344.779	0.07453
343.034		346.504	0.67475	346.682	0.20141	351.402	-0.13088	332.275		330.695	0.12286	347.436	-0.16981	345.591	0.06643	345.505	0.35129	347.736	-0.27094	347.835	-0.22039	344.872	0.04073
343.127	0.17298	346.597	0.25531	346.775	-0.00839	351.494	-0.13511	332.367		330.79	0.08654	347.529	-0.26347	345.683	0.03822	345.598	0.32746	347.828	-0.24457	347.928	-0.18711	344.965
343.219	0.12685	346.689	0.08299	346.868	-0.02747	351.587	-0.15577	332.46		330.882	0.09962	347.622	-0.2402	345.776	0.02825	345.69	0.14523	347.921	-0.20797	348.021		345.057
343.312	0.03321	346.782	-0.10914	346.96		351.679	-0.20331	332.571	0.16178	330.975		347.714	-0.22078	345.868	0.0602	345.783	0.00104	348.013		348.113		345.15	0.06857
343.405	0.15701	346.875	-0.10572	347.053		351.772	-0.1095	332.664	0.17443	331.067		347.807	-0.18375	345.961		345.875	0.14347	348.106		348.206	-0.16788	345.242	0.02137
343.497		346.967		347.146		351.865	-0.09324	332.76	0.17373	331.16	0.06626	347.899	-0.11924	346.053		345.968		348.199	-0.14353	348.298	-0.2024	345.335	0.08317
343.59		347.06		347.238	-0.09015	351.957	-0.04294	332.852	0.1388	331.252	0.08414	347.992		346.146	0.0342	346.06		348.291	-0.18509	348.391	-0.23708	345.428	0.05311
343.682		347.153		347.331	-0.10729	352.05		332.945	0.14891	331.354	0.07304	348.085		346.238	0.05242	346.153	0.15821	348.384	-0.21328	348.484	-0.188	345.526	0.09275
343.775	0.06054	347.245	-0.20434	347.408	-0.10431	352.143	-0.02686	333.038		331.447	0.10416	348.177	-0.07117	346.49	0.17244	346.272	0.1906	348.476	-0.21446	348.576	-0.18	345.619	0.13836
343.868	-0.11717	347.338	-0.24841	347.501	-0.12607	352.235	-0.06532	333.13	0.1001	331.539	0.11162	348.27	-0.06474	346.583	0.32552	346.294	0.21965	348.569	-0.23075	348.669	-0.23801	345.712	0.10586
343.96		347.401	-0.31634	347.593	-0.15897	352.328	-0.06266	333.223	0.12805	331.632	0.1467	348.362	-0.11893	346.675	0.26229	346.315	-0.05349	348.662	-0.22716	348.761	-0.19602	345.804	0.07913
344.053		347.493	-0.36546	347.686	-0.14902	352.42	-0.26169	333.315	0.10185	331.724	0.12075	348.455	-0.09924	346.768	0.1222	346.337	0.89422	348.754	-0.16655	348.854	-0.15591	345.897	0.09467
344.145	-0.16324	347.586	-0.35961	347.778	-0.18565	352.513		333.408	0.10867	331.819	0.07558	348.548	-0.08709	346.861	0.06249	346.365	0.78741	348.847	-0.16096	348.947	-0.13891	345.989
344.238	-0.10706	347.678	-0.30226	347.871	-0.1775	352.605		333.501	0.08313	331.912	0.04817	348.64	-0.13313	346.953	0.0132	346.386	0.83598	348.939	-0.15612	349.039		346.082
344.33	0.14958	347.771	-0.34002	347.963		352.698	-0.37494	333.593		332.004		348.733	-0.10574	347.046		346.408	0.88005	349.032		349.132	-0.13935	346.174	0.0853
344.423	0.17551	347.864	-0.25015	348.056		352.791	-0.15637	333.686	0.14248	332.097		348.825	-0.06963	347.138		346.429	0.84995	349.124		349.224	-0.12477	346.54	0.20328
344.516		347.956	-0.23645	348.149	-0.06814	352.883	-0.08947	333.779	0.11776	332.189		348.918	-0.05599	347.231	-0.04911	346.476	0.42433	349.217	-0.14216	349.317	-0.09153	346.633	-0.11875
344.608		348.049		348.241	-0.15141	352.976		333.871	0.14823	332.282		349.011		347.324	-0.10595	346.568	0.00169	349.31	-0.13319	349.409	-0.20768	346.725	-0.23402
344.701	0.19055	348.142	-0.13156	348.334	-0.1158	353.068		333.964		332.375		349.103		347.444	-0.13006	346.661	-0.17524	349.402	-0.28311	349.502	-0.13057	346.818	-0.19491
344.793	0.16247	348.234	-0.21413	348.427	-0.13551	353.161	-0.07803	334.056		332.467		349.196	-0.04613	347.536	-0.17848	346.754	-0.18366	349.495	-0.20208	349.595	-0.13507	346.91	-0.16384
344.886	0.01366	348.327	-0.2266	348.519	-0.11707	353.254	-0.04408	334.149	0.13519	332.578	0.16504	349.288	-0.02992	347.629	-0.15868	346.846	-0.18419	349.587	-0.18154	349.692	-0.20132	347.003
344.979		348.419	-0.21949	348.612	-0.11195	353.346	-0.02865	334.242	0.12508	332.671	0.07498	349.381	-0.07303	347.721	-0.14861	346.939	-0.23925	349.685	-0.19497	349.785	-0.15727	347.096
345.071		348.512	-0.42826	348.704	-0.1342	353.439	-0.17757	334.334	0.10937	332.767	0.12174	349.473	-0.06323	347.814	-0.12393	347.032		349.778	-0.18994	349.877	-0.1535	347.188	-0.11783
345.164	-0.05288	348.605	-0.24049	348.797	-0.11916	353.531	-0.99668	334.43	0.18711	332.86	0.14123	349.566	-0.05375	347.907	-0.13108	347.124		349.87	-0.19526	349.97		347.281	-0.14494
345.257	0.00859	348.697	-0.24562	348.889	-0.14568	353.624	-0.94854	334.522	0.22107	332.952	0.07984	349.664	-0.02717	347.999		347.217	-0.18459	349.963		350.063		347.374	-0.207
345.349	0.04381	348.79	-0.20294	348.982		353.716	-0.61085	334.615	0.19151	333.045		349.756	-0.0278	348.092		347.309	-0.24663	350.056		350.155		347.472	-0.18869
345.448	0.1636	348.882	-0.19055	349.075		353.809	-0.31188	334.707	0.14973	333.137	0.0935	349.849	-0.01708	348.184	-0.0604	347.451	-0.32401	350.148		350.248		347.565	-0.13721
345.541	0.1835	348.975		349.167	-0.12284	353.902	-0.29166	334.8	0.12077	333.23	0.0738	349.941	-0.03735	348.277	-0.07057	347.543	-0.37903	350.241		350.341	-0.08368	347.657	-0.10551
345.633	0.2481	349.067		349.26	-0.09842	353.994		334.892	0.15471	333.322	0.09499	350.034		348.37	-0.0644	347.636	-0.37321	350.333	-0.12271	350.433	-0.24977	347.75	-0.2004
345.726	0.22573	349.16	-0.149	349.352	-0.09931	354.087		334.985		333.415	0.05798	350.127		348.462	-0.08894	347.728	-0.32922	350.426	-0.2328	350.526	-0.23319	347.842	-0.13003
345.818	0.1411	349.253	-0.12242	349.445	-0.11189	354.18	-0.18166	335.078		333.508	0.07558	350.219		348.555	-0.1348	347.821	-0.24323	350.519	-0.2881	350.618	-0.21104	347.935	-0.16429
345.911	0.09143	349.345	-0.17582	349.538	-0.07378	354.272	-0.16922	335.17		333.601	0.04989	350.312		348.647	-0.13754	347.914	-0.17988	350.611	-0.23244	350.711	-0.23531	348.028
346.003		349.438	-0.20151	349.635	-0.11271	354.365	-0.43432	335.263	0.12118	333.693	0.08512	350.405	-0.07146	348.74	-0.09968	348.006		350.704	-0.27782	350.803	-0.16164	348.12
346.096		349.53	-0.16153	349.728	-0.10536	354.458	-0.9012	335.355	0.10295	333.786	0.05707	350.497	-0.05579	348.832	-0.06309	348.099		350.796	-0.21002	350.896	-0.08374	348.213	-0.10047
346.189	0.14823	349.628	-0.22419	349.82	-0.09289	354.55	-0.425	335.447	0.19012	333.878	0.05463	350.59	-0.05068	348.925	-0.06641	348.192	-0.15895	350.889	-0.18245	350.989		348.306	-0.07502
346.251	0.16134	349.721	-0.22973	349.913	-0.08856	354.643	-0.3669	335.539	0.17963	333.971		350.682	-0.09515	349.018		348.284	-0.17702	350.981		351.081		348.398	-0.13804
346.28	0.34311	349.813	-0.18558	350.006		354.735	-0.34555	335.632	0.11985	334.063		350.775	-0.05509	349.11		348.377	-0.17692	351.074		351.174	-0.03361	348.491	-0.14705
346.301	0.56003	349.906	-0.14866	350.098		354.828	-0.20217	335.724	0.13242	334.156	0.0873	350.867	0.00301	349.203	-0.0352	348.469	-0.22111	351.167	-0.11296	351.266	-0.02656	348.583	-0.12654
346.322	0.62708	349.998		350.191		354.921	-0.21342	335.817	0.1543	334.249	0.10183	350.96		349.295	-0.02481	348.562	-0.2299	351.259	-0.11317	351.359	-0.11444	348.676	-0.14693
346.344	0.51958	350.091		350.283		355.013		335.909	0.14024	334.341	0.07395	351.053		349.388	-0.06671	348.654	-0.33022	351.352	-0.13384	351.452	-0.23477	348.768	-0.10222
346.372	0.51644	350.184		350.376	-0.11637	355.106		336.002		334.437	0.11365	351.145	0.03811	349.481	-0.09302	348.747	-0.21663	351.444	-0.32039	351.544	-0.22182	348.861	-0.11834
346.394	0.56949	350.276		350.469	-0.15414	355.199	-0.15939	336.095		334.529	0.12457	351.238	0.02048	349.573	-0.0829	348.84	-0.17213	351.537	-0.34241	351.637	-0.26545	348.954	-0.06341
346.415	0.48187	350.369	-0.20446	350.561	-0.12591	355.291	-0.12807	336.187	0.09154	334.622	0.15284	351.33	0.01699	349.671	-0.04594	348.932	-0.15889	351.63	-0.38748	351.729	-0.16163	349.046
346.436	0.40834	350.462	-0.28472	350.654	-0.20087	355.384		336.28	0.12949	334.714	0.14189	351.423	-0.000240702	349.763	-0.06992	349.025		351.722	-0.32516	351.822	-0.11105	349.139	-0.04649
346.469	0.16678	350.554	-0.23116	350.746	-0.10446	355.476	-0.23103	336.372	0.14758	334.807	0.09245	351.516	0.01026	349.856	-0.07772	349.117		351.815	-0.18381	351.915	-0.07441	349.231	-0.07463
346.561	-0.09827	350.647	-0.26388	350.839	-0.08531	355.569	-0.29869	336.471	0.20017	334.899	0.10966	351.608	-0.01768	349.949	-0.02715	349.21	-0.1272	351.907	-0.15358	352.007		349.324	-0.05751
346.654	-0.2075	350.739	-0.27521	350.931	-0.07415	355.661	-0.29677	336.563	0.25601	334.992		351.701	-0.01966	350.041		349.303	-0.12468	352		352.1		349.417	-0.14672
346.746	-0.35018	350.832	-0.19724	351.024		355.754	-0.23453	336.656	0.20285	335.085		351.793	-0.02433	350.134		349.395	-0.22755	352.093		352.192	-0.0686	349.509	-0.079
346.839	-0.39206	350.924	-0.14772	351.117		355.847	-0.20875	336.748	0.13203	335.177		351.886	0.00407	350.227		349.488	-0.18027	352.185	-0.13249	352.285	-0.05616	349.602	-0.06586
346.932	-0.32121	351.017		351.209	-0.04284	355.939	-0.17415	336.841	0.09471	335.27	0.09379	351.979		350.319	-0.0405	349.58	-0.19163	352.278	-0.15736	352.378	-0.2328	349.699	-0.08203
347.024		351.11		351.302	-0.02722	356.032		336.934	0.15643	335.363	0.13332	352.071		350.412	-0.07845	349.678	-0.22846	352.371	-0.19383	352.47		349.792	-0.08826
347.117		351.202	-0.13695	351.395	-0.05783	356.125		337.026		335.454	0.18087	352.164	0.0435	350.504	-0.0837	349.771	-0.19393	352.463		352.563		349.885	-0.08835
347.21	-0.31153	351.295	-0.07081	351.487	-0.16416	356.217	-0.16989	337.119		335.546	0.1485	352.256	0.06557	350.597	-0.0981	349.863	-0.17525	352.556		352.655		349.977
347.302	-0.24389	351.387	-0.18832	351.58	-0.11464	356.31	-0.13104	337.211	0.13735	335.639	0.14721	352.349	0.02454	350.689	-0.04469	349.956	-0.13832	352.648		352.748	-0.37936	350.07
347.394	-0.19714	351.48	-0.28344	351.672	-0.15411	356.403	-0.15858	337.304	0.15791	335.731	0.15229	352.442	-0.09938	350.782	-0.03415	350.048		352.741	-0.4672	352.841	-0.14884	350.162
347.486	-0.22823	351.572	-0.26008	351.765	-0.12733	356.495	-0.21404	337.397	0.19611	335.824	0.09398	352.534		350.875	-0.00967	350.141		352.833	-0.30982	352.933	-0.14	350.255
347.579	-0.76718	351.665	-0.28136	351.858	-0.03029	356.588	-0.24785	337.485	0.1629	335.917	0.10528	352.627		350.967		350.234		352.926	-0.17819	353.026		350.348	-0.06778
347.671	-0.88538	351.758	-0.2451	351.95	-0.0702	356.68	-0.24148	337.578	0.23887	336.009		352.719	-0.06437	351.06		350.326	-0.10626	353.019		353.118		350.44	-0.10632
347.764	-0.67283	351.85	-0.15192	352.043		356.773	-0.18914	337.67	0.22794	336.102		352.812	0.0676	351.152	0.0213	350.419	-0.22799	353.111		353.211	-0.14356	350.533	-0.14758
347.857	-0.61886	351.943	-0.1275	352.135	-0.03596	356.866	-0.19886	337.763	0.1064	336.194	0.09973	352.904	-0.026	351.245	0.04193	350.511	-0.27975	353.204	-0.09769	353.303	-0.11629	350.625	-0.1108
347.949	-0.38417	352.036		352.228	-0.04693	356.958	-0.16598	337.856	0.19423	336.287	0.13334	352.997		351.338	0.00915	350.604	-0.30676	353.296	-0.17151	353.396	-0.26371	350.718	-0.10224
348.042		352.128	-0.12188	352.321	-0.06043	357.051		337.948	0.15834	336.38	0.17531	353.09		351.43	-0.04886	350.697	-0.25214	353.389	-0.3106	353.489	-0.32119	350.811	-0.0782
348.134	-0.35625	352.221	-0.10364	352.413	-0.23253	357.143	-0.15406	338.041		336.478	0.18899	353.182	0.04014	351.523	-0.03832	350.789	-0.23007	353.481	-0.524	353.581	-0.75516	350.903	-0.0385
348.227	-0.55697	352.313	-0.13066	352.506		357.236	-0.17236	338.133	0.10987	336.57	0.19996	353.275	0.02624	351.615	-0.05685	350.882	-0.11125	353.574	-0.85533	353.674	-0.85709	350.996
348.32	-0.66844	352.406	-0.38542	352.598		357.329	-0.18913	338.226	0.16584	336.663	0.14837	353.367	0.00817	351.708	-0.05451	350.974		353.667	-0.95528	353.766	-0.40501	351.088
348.412	-0.30766	352.499		352.691	-0.32507	357.421	-0.20473	338.319	0.12592	336.756	0.11568	353.46	0.01561	351.801	-0.02725	351.067		353.759	-0.40395	353.859	-0.24475	351.181	-0.01909
348.505	-0.31179	352.591		352.783	-0.2115	357.514	-0.25002	338.411	0.13598	336.848	0.12191	353.553	-0.57003	351.893	0.01989	351.159	-0.10458	353.852	-0.29951	353.952	-0.21894	351.274	-0.01807
348.597	-0.18566	352.684		352.876	-0.0794	357.607	-0.27743	338.504	0.20404	336.941	0.14861	353.645	-0.58934	351.986		351.252	-0.0887	353.945	-0.28907	354.044		351.366	-0.08398
348.69	-0.25744	352.776	-0.37881	352.969		357.699	-0.23953	338.604		337.033		353.738	-0.35507	352.078		351.345	-0.15287	354.037		354.137	-0.19387	351.459	-0.12715
348.783	-0.17192	352.869	-0.21068	353.061		357.792	-0.18478	338.697		337.126	0.13664	353.83	-0.20926	352.171	0.01181	351.437	-0.3083	354.13	-0.28381	354.23	-0.15566	351.551	-0.10416
348.875	-0.18774	352.961		353.154	-0.0855	357.885	-0.14369	338.79		337.219	0.11097	353.923	-0.19817	352.264	0.03387	351.53	-0.3511	354.223	-0.22543	354.322	-0.24607	351.644	-0.13814
348.968		353.054		353.246	-0.03567	357.977		338.882		337.311	0.05343	354.016		352.356	0.02576	351.622	-0.36416	354.315	-0.32976	354.415	-0.49755	351.736	-0.12141
349.06		353.147	-0.18426	353.339	-0.08105	358.07		338.975		337.404	0.14492	354.108		352.449	-0.09106	351.715	-0.27423	354.408	-0.59806	354.508	-0.50144	351.829	-0.07064
349.153	-0.16859	353.239	-0.18122	353.432	-0.20363	358.162	-0.14638	339.067		337.492	0.19007	354.201	-0.15554	352.541		351.808	-0.18091	354.5	-0.61924	354.6	-0.35519	351.922	-0.05838
349.245	-0.2346	353.332	-0.15218	353.524	-1.06584	358.255	-0.15517	339.16		337.585	0.17779	354.294	-0.15871	352.634	-0.12938	351.9	-0.13551	354.593	-0.3795	354.693	-0.3078	352.014
349.338	-0.1446	353.424	-0.32697	353.617	-1.12438	358.348		339.253		337.678	0.15072	354.386	-0.33002	352.726	-0.02857	351.993		354.686	-0.2734	354.785	-0.22153	352.107
349.431	-0.1629	353.517	-0.68769	353.709	-0.60885	358.44		339.345	0.12645	337.77	0.14646	354.479	-0.5925	352.819	-0.05409	352.086		354.778	-0.28057	354.878	-0.20408	352.2	-0.04796
349.523	-0.07523	353.61	-1.29343	353.802	-0.2426	358.533		339.438	0.22593	337.863	0.07572	354.572	-0.41472	352.912	0.00253	352.178	-0.08841	354.871	-0.22389	354.971		352.292	-0.07393
349.621	-0.1282	353.702	-0.81047	353.895	-0.21508	358.626	-0.38687	339.53	0.25035	337.955	0.13226	354.664	-0.31994	353.004		352.271	-0.11608	354.963		355.063		352.385	-0.18237
349.714	-0.16555	353.795	-0.34378	353.987		358.718	-0.26342	339.623	0.2244	338.048		354.757	-0.25343	353.097		352.363	-0.12811	355.056		355.156	-0.13465	352.477
349.806	-0.15201	353.887	-0.2909	354.08		358.811	-0.15821	339.715	0.265	338.141	0.09748	354.849	-0.15591	353.189	0.01608	352.456		355.149	-0.17447	355.248	-0.15768	352.57
349.899	-0.15342	353.98		354.173	-0.20745	358.903	-0.13297	339.808	0.17384	338.233	0.09862	354.942	-0.22354	353.282	0.04147	352.549		355.241	-0.17487	355.341	-0.1597	352.662	-0.39638
349.991		354.073		354.265	-0.23853	358.996		339.901	0.17955	338.326	0.08336	355.035		353.375	-0.00231	352.641		355.334	-0.22183	355.434	-0.18273	352.755	-0.19672
350.084		354.165	-0.22412	354.358	-0.39488	359.089		339.993		338.418	0.1836	355.127	-0.11179	353.467	0.00985	352.734		355.426	-0.33489	355.526	-0.23244	352.848	-0.11982
350.177		354.258	-0.21391	354.451	-0.5854	359.181	-0.15838	340.086		338.511	0.24186	355.22	-0.16065	353.56	-0.6372	352.826	-0.25051	355.519	-0.32156	355.619	-0.24936	352.94	-0.09654
350.269		354.351	-0.28899	354.543	-0.3995	359.274	-0.16181	340.179	0.11633	338.612		355.312	-0.10431	353.652	-0.68997	352.919	-0.18277	355.612	-0.28789	355.711	-0.20428	353.033
350.362	-0.01794	354.443	-0.91368	354.636	-0.27915	359.366	-0.15434	340.271	0.18041	338.704		355.405	-0.26597	353.745	-0.32711	353.011		355.704	-0.2584	355.804	-0.18843	353.125	-0.10099
350.454	-0.07955	354.536	-0.61687	354.728	-0.20939	359.459	-0.26146	340.364	0.17174	338.797		355.498	-0.24685	353.838	-0.15089	353.104		355.797	-0.17559	355.897	-0.15932	353.218	-0.09998
350.547	-0.10438	354.629	-0.43389	354.821	-0.17473	359.552	-0.22755	340.465	0.24327	338.889		355.59	-0.30112	353.93	-0.13333	353.197	-0.10831	355.89	-0.19994	355.989		353.311	-0.05134
350.639	-0.10364	354.721	-0.39411	354.913	-0.11785	359.644	-0.29456	340.558	0.20336	338.982		355.683	-0.24779	354.023		353.289	-0.09197	355.982		356.082		353.403	-0.17411
350.732	-0.11589	354.814	-0.30905	355.006		359.737	-0.16509	340.651	0.23304	339.074		355.775	-0.19749	354.116		353.382	-0.23624	356.075		356.175	-0.21181	353.496	-0.26312
350.825	-0.1139	354.906	-0.31289	355.099		359.829	-0.17375	340.743	0.18822	339.167		355.868	-0.11544	354.208	-0.09384	353.474	-0.4659	356.167	-0.17984	356.267	-0.16979	353.588	-0.48165
350.917	-0.11939	354.999		355.191	-0.15288	359.922	-0.11383	340.836	0.18597	339.26		355.961		354.301	-0.10865	353.567	-1.15493	356.26	-0.12319	356.36	-0.15803	353.681	-0.48951
351.01		355.092		355.284	-0.13706	360.015		340.928	0.19589	339.352	0.09665	356.053		354.394	-0.26254	353.659	-1.0854	356.353	-0.19206	356.452	-0.22995	353.774	-0.32099
351.102		355.184	-0.22749	355.377	-0.25935	360.107		341.021		339.445	0.22365	356.146	-0.1386	354.486	-0.40774	353.752	-0.46761	356.445	-0.25795	356.545	-0.17079	353.866	-0.16739
351.195	-0.03266	355.277	-0.17044	355.469	-0.22448	360.2	-0.11237	341.113		339.537	0.22092	356.239	-0.10562	354.579	-0.31608	353.845	-0.30435	356.538	-0.19987	356.638	-0.19165	353.959
351.288	-0.04335	355.369	-0.24855	355.562	-0.34789	360.293	-0.11976	341.206	0.13223	339.63	0.17456	356.331	-0.09178	354.671	-0.20987	353.937	-0.26454	356.63	-0.21449	356.73	-0.13927	354.051
351.38	-0.00916	355.462	-0.33513	355.654	-0.27346	360.385	-0.20058	341.299	0.13151	339.723	0.15528	356.424	-0.16844	354.764	-0.13162	354.03		356.723	-0.16817	356.823	-0.17538	354.144	-0.09465
351.473	-0.01374	355.555	-0.41792	355.747	-0.2256	360.478	-0.21875	341.391	0.16486	339.815	0.13223	356.516	-0.17698	354.857	-0.09492	354.123		356.816	-0.17534	356.916	-0.15931	354.237	-0.10975
351.565	-0.09404	355.647	-0.31807	355.84	-0.19076	360.57	-0.30079	341.484	0.1669	339.908	0.10756	356.609	-0.15966	354.949	-0.0837	354.215	-0.20782	356.908	-0.17112	357.008		354.329	-0.18051
351.658	-0.12933	355.74	-0.29726	355.932	-0.11454	360.663	-0.26102	341.576	0.21988	340		356.702	-0.16016	355.042		354.308	-0.21322	357.001		357.101		354.422	-0.36973
351.751	-0.10399	355.832	-0.22746	356.025		360.756	-0.14816	341.669	0.14355	340.093		356.794	-0.14126	355.134	-0.08579	354.401	-0.47737	357.094		357.193	-0.11311	354.515	-0.38857
351.843	-0.15418	355.925	-0.15242	356.117		360.848	-0.14746	341.762	0.17738	340.186	0.11397	356.887	-0.09856	355.227	-0.07705	354.493	-0.67257	357.186	-0.16938	357.286	-0.10215	354.607	-0.26238
351.936	-0.1973	356.018		356.21	-0.13837	360.941	-0.15175	341.854	0.20914	340.278	0.09803	356.98		355.32	-0.08104	354.586	-0.47606	357.279	-0.1642	357.379	-0.12657	354.7	-0.18394
352.029		356.11		356.303	-0.11829	361.034		341.947	0.17403	340.371	0.13675	357.072		355.412	-0.16074	354.678	-0.37428	357.371	-0.19413	357.471	-0.18331	354.792	-0.17456
352.121		356.203	-0.18669	356.395	-0.21484	361.126	-0.07129	342.039		340.472	0.2136	357.165	-0.09838	355.505	-0.18588	354.771	-0.23535	357.464	-0.26049	357.564	-0.1367	354.885	-0.12778
352.214	-0.03964	356.296	-0.2051	356.488	-0.16389	361.219	-0.06921	342.132	0.15772	340.565	0.19817	357.257	-0.10871	355.597	-0.23323	354.864	-0.20663	357.557	-0.24084	357.657	-0.12989	354.978
352.306	-0.02204	356.388	-0.1968	356.581	-0.11224	361.311	-0.09422	342.224	0.1571	340.658	0.13741	357.35	-0.10793	355.69	-0.22523	354.956	-0.18841	357.649	-0.18269	357.749	-0.11296	355.07
352.399	-0.15283	356.481	-0.23763	356.673	-0.195	361.404	-0.0689	342.317	0.16028	340.75	0.14399	357.443	-0.14517	355.783	-0.11276	355.049		357.742	-0.16457	357.842	-0.11545	355.163	-0.08848
352.491		356.573	-0.25347	356.766	-0.17253	361.496	-0.06388	342.41	0.17754	340.843	0.13311	357.535	-0.17447	355.875	-0.10225	355.142	-0.13161	357.835	-0.15312	357.934	-0.10332	355.256	-0.07047
352.584	-0.57945	356.666	-0.47136	356.858	-0.14539	361.589	-0.05473	342.502	0.17487	340.935	0.10747	357.628	-0.13613	355.968		355.234	-0.17134	357.927	-0.15426	358.027		355.348	-0.12133
352.677	-0.29114	356.759	-0.26097	356.951	-0.15391	361.682	-0.08624	342.6	0.19673	341.028		357.721	-0.16338	356.061		355.327	-0.17095	358.02		358.12		355.441	-0.2036
352.769	-0.11277	356.851	-0.18886	357.044		361.774	-0.05086	342.692	0.15465	341.121		357.813	-0.13292	356.153	-0.12203	355.419	-0.28567	358.113		358.212	-0.11276	355.533	-0.21456
352.862	-0.04851	356.944	-0.22845	357.136	-0.13075	361.867	0.01683	342.785	0.21142	341.213	0.1113	357.906	-0.10435	356.246	-0.08361	355.512	-0.33976	358.205	-0.14151	358.305	-0.13731	355.626	-0.27281
352.954	-0.11091	357.037		357.229	-0.18636	361.96		342.878	0.16027	341.306	0.05978	357.999		356.338	-0.0869	355.605	-0.35208	358.298	-0.14027	358.398		355.719	-0.24037
353.047		357.129	-0.16573	357.322	-0.21433	362.052		342.97		341.398	0.12254	358.091		356.431	-0.09787	355.697	-0.26706	358.391		358.49		355.811	-0.18054
353.14	-0.05872	357.222	-0.24399	357.414	-0.30037	362.145	-0.02346	343.063		341.491	0.20719	358.184	-0.10144	356.524	-0.10474	355.79	-0.18106	358.483		358.583	-0.32726	355.904	-0.12237
353.232	-0.08145	357.314	-0.20304	357.507	-0.204	362.237	0.00143	343.155	0.17694	341.584	0.23997	358.277	-0.0973	356.616	-0.13303	355.882	-0.16948	358.576	-0.42627	358.676	-0.22178	355.996
353.325	-0.09652	357.407	-0.24419	357.599	-0.21614	362.33	0.01863	343.248	0.1984	341.676	0.25783	358.369		356.709	-0.15276	355.975		358.668	-0.31049	358.768	-0.14351	356.089
353.417	-0.02969	357.5	-0.23587	357.692	-0.18194	362.423	-0.00896	343.34	0.17667	341.769	0.17745	358.462		356.801	-0.10029	356.068		358.761	-0.23192	358.861	-0.12325	356.182	-0.13515
353.51	-0.95003	357.592	-0.23157	357.785	-0.21021	362.515	-0.02914	343.433		341.861	0.07102	358.554	-0.3308	356.894	-0.09217	356.16	-0.14318	358.854	-0.10748	358.953	-0.12485	356.274	-0.10751
353.602	-1.06942	357.685	-0.26754	357.877	-0.19721	362.608	-0.05248	343.526		341.954	0.11304	358.647	-0.2519	356.987		356.253	-0.1532	358.946	-0.18507	359.046		356.367	-0.14741
353.695	-0.6878	357.778	-0.21197	357.97		362.701	-0.17588	343.618		342.046		358.74	-0.14883	357.079		356.346	-0.16766	359.039		359.139	-0.05794	356.46	-0.21224
353.788	-0.43107	357.87	-0.19961	358.063		362.793	-0.11773	343.711	0.05357	342.139	0.09848	358.832	-0.08396	357.172	-0.07856	356.438	-0.26449	359.131	-0.05779	359.231	-0.05563	356.552	-0.16987
353.88	-0.46092	357.963		358.155	-0.15786	362.886	-0.09819	343.803	0.26429	342.231	0.0931	358.925	-0.10762	357.265	-0.07832	356.531	-0.23516	359.224	-0.0643	359.324	-0.08032	356.645	-0.15554
353.973		358.056		358.248	-0.17555	362.979		343.896	0.2153	342.324	0.08083	359.017		357.357	-0.09528	356.623	-0.22292	359.317	-0.14381	359.416	-0.10956	356.737	-0.17412
354.066		358.148	-0.17355	358.341	-0.12239	363.071		343.989		342.417	0.11004	359.11		357.45	-0.14526	356.716	-0.19689	359.409	-0.16696	359.509	-0.15007	356.83	-0.18448
354.158	-0.45091	358.241	-0.1944	358.433		363.164	-0.06338	344.081		342.509	0.11547	359.203	-0.06326	357.543	-0.21924	356.809	-0.16881	359.502	-0.20142	359.602	-0.14269	356.923	-0.13175
354.251	-0.46727	358.334	-0.20176	358.526		363.256	-0.14479	344.174	0.11775	342.607	0.13454	359.295	-0.08378	357.635	-0.13787	356.901	-0.15737	359.594	-0.23879	359.694	-0.06108	357.015
354.344	-0.44427	358.426		358.618	-0.28803	363.349	-0.09851	344.266	0.12671	342.699	0.11428	359.388	-0.1475	357.728	-0.09387	356.994		359.687	-0.18033	359.787	-0.10106	357.108
354.436	-0.88786	358.519		358.711	-0.2331	363.442	-0.12999	344.359	0.15289	342.792	0.13069	359.48	-0.18319	357.82	-0.10124	357.087		359.78	-0.16255	359.879	-0.0818	357.2	-0.15151
354.529	-0.71308	358.611	-0.48992	358.804	-0.15668	363.534	-0.16058	344.452	0.15293	342.885	0.1288	359.573	-0.20909	357.913	-0.10004	357.179	-0.1737	359.872	-0.16384	359.972		357.293	-0.12876
354.621	-0.39031	358.704	-0.25707	358.896	-0.12608	363.627	-0.20597	344.544	0.24521	342.977		359.666	-0.18684	358.006		357.272	-0.15109	359.965		360.065		357.386	-0.17027
354.714	-0.43535	358.797	-0.20532	358.989		363.72	-0.13472	344.637	0.2435	343.07		359.758	-0.12412	358.098		357.364	-0.25414	360.058		360.157	-0.06201	357.478	-0.19759
354.807	-0.50362	358.889	-0.2199	359.081		363.812	-0.08785	344.729	0.12619	343.162	0.0994	359.851	-0.08083	358.191	-0.08227	357.457	-0.23513	360.15	-0.14719	360.25	-0.08013	357.571	-0.17469
354.899	-0.35748	358.982		359.174	-0.02481	363.905	-0.1331	344.822	0.16496	343.255	0.14285	359.944	-0.05344	358.284	-0.0564	357.55	-0.24077	360.243	-0.11223	360.343	-0.05468	357.664	-0.18071
354.992		359.074		359.267	-0.11133	363.998		344.915	0.11964	343.348	0.12615	360.036		358.376		357.642	-0.20506	360.335	-0.1472	360.435	-0.16025	357.756	-0.17383
355.084		359.167	-0.10602	359.359	-0.12756	364.09		345.007		343.44		360.129	-0.0713	358.469		357.735	-0.19024	360.428	-0.23053	360.528	-0.1903	357.849	-0.12097
355.177	-0.25004	359.26	-0.17137	359.452	-0.06261	364.183	-0.11766	345.1		343.533		360.221	-0.04533	358.562	-0.23864	357.828	-0.15316	360.521	-0.25296	360.62	-0.18207	357.942	-0.0869
355.27	-0.27723	359.352	-0.15155	359.545	-0.10449	364.275	-0.12372	345.192	0.0897	343.625		360.314	-0.06446	358.654	-0.18561	357.92	-0.17888	360.613	-0.20964	360.713	-0.13734	358.034
355.362	-0.37451	359.445	-0.17769	359.637	-0.04598	364.368	-0.14128	345.285	0.10458	343.718	0.33853	360.407	-0.16196	358.747	-0.08304	358.013		360.706	-0.19392	360.805	-0.11872	358.127	-0.13413
355.455	-0.3194	359.537	-0.40005	359.73	-0.09171	364.461	-0.16158	345.378	0.12472	343.811	0.35178	360.499	-0.1824	358.839	-0.06164	358.106		360.798	-0.18037	360.898	-0.10044	358.22	-0.13346
355.547	-0.34339	359.63	-0.27061	359.822	-0.06321	364.553	-0.22697	345.477	0.19888	343.903	0.18744	360.592	-0.23526	358.932	-0.06091	358.198	-0.1237	360.891	-0.14554	360.991		358.312	-0.09907
355.64	-0.37299	359.723	-0.23006	359.915	-0.06206	364.646	-0.21489	345.569	0.16557	343.996		360.684	-0.18313	359.024		358.291	-0.14852	360.984		361.084		358.405
355.733	-0.33439	359.815	-0.23055	360.008		364.739	-0.15871	345.662	0.25343	344.088		360.777	-0.11432	359.117		358.383		361.076		361.176	-0.02642	358.497
355.825	-0.37651	359.908	-0.20496	360.1		364.831	-0.14488	345.754	0.17845	344.181	0.12571	360.87	-0.08318	359.21	-0.03211	358.476		361.169	-0.05913	361.269	-0.04585	358.59	-0.30322
355.918	-0.25194	360		360.193	-0.04221	364.924	-0.12898	345.847	0.17793	344.274	0.08605	360.962		359.302	-0.0121	358.569		361.261	-0.10572	361.361	-0.07115	358.683	-0.27808
356.011		360.093		360.285	-0.07036	365.017		345.939	0.11678	344.366	0.14487	361.055		359.395	-0.09006	358.661	-0.38758	361.354	-0.07311	361.454	-0.09341	358.775	-0.15564
356.103		360.186	-0.17022	360.378	-0.14222	365.109		346.032		344.459	0.40266	361.148	-0.04631	359.488	-0.1386	358.754	-0.1994	361.447	-0.10274	361.546	-0.06834	358.868	-0.1326
356.196	-0.30813	360.278	-0.1338	360.471	-0.15564	365.202	-0.12606	346.125		344.551	0.36111	361.24	-0.08398	359.58	-0.1202	358.847	-0.19926	361.539	-0.15386	361.639	-0.08056	358.96
356.288	-0.32472	360.371	-0.20684	360.563	-0.09751	365.294	-0.11609	346.217	0.09618	344.644	0.28765	361.333	-0.09214	359.673	-0.11162	358.939	-0.17639	361.632	-0.17046	361.732	-0.06615	359.053
356.381	-0.26346	360.464	-0.23185	360.656	-0.08617	365.387	-0.14499	346.511	0.73418	344.736	0.11787	361.425	-0.11395	359.765	-0.08309	359.032		361.725	-0.13947	361.824	-0.03794	359.146	-0.11672
356.474	-0.19893	360.556	-0.30114	360.748	-0.08634	365.48	-0.23999	346.604	0.91956	344.829	0.1222	361.518	-0.10855	359.858	-0.09301	359.124		361.817	-0.11053	361.917	-0.09288	359.238	-0.12095
356.566	-0.2243	360.649	-0.24776	360.841	-0.10536	365.572	-0.25457	346.697	0.43575	344.922	0.10272	361.61	-0.09198	359.951	-0.09821	359.217	-0.11958	361.91	-0.11007	362.009		359.331	-0.13376
356.659	-0.34358	360.741	-0.21234	360.934	-0.09133	365.665	-0.1957	346.789	0.0232	345.014		361.703	-0.07916	360.043		359.309	-0.14912	362.002		362.102		359.423	-0.16715
356.751	-0.16653	360.834	-0.19515	361.026		365.758	-0.1471	346.882	-0.05552	345.107		361.796	-0.10388	360.136	-0.0332	359.402	-0.20664	362.095		362.195	-0.05483	359.516	-0.21147
356.844	-0.22431	360.927	-0.17311	361.119		365.85	-0.09613	346.975		345.2	0.11508	361.888	-0.09555	360.229	-0.07665	359.495	-0.25436	362.188	-0.12585	362.287	-0.05685	359.609	-0.18439
356.937	-0.30015	361.019		361.212	-0.03685	365.943	-0.15468	347.067		345.292	0.08489	361.981		360.321	-0.04725	359.587	-0.25967	362.28	-0.09595	362.38	-0.07303	359.701	-0.20264
357.029		361.112		361.304	-0.0734	366.036		347.16		345.385	0.13704	362.074		360.414	-0.16261	359.68	-0.19224	362.373	-0.09804	362.473	-0.10472	359.794	-0.15064
357.122		361.204	-0.02319	361.397	-0.05607	366.128	-0.17114	347.252	-0.13456	345.484	0.09738	362.166	-0.04808	360.506	-0.16776	359.773	-0.18542	362.465	-0.2171	362.565	-0.11246	359.887	-0.08891
357.215	-0.29916	361.297	-0.1004	361.489	-0.05009	366.221	-0.13594	347.345	-0.17784	345.576	0.16701	362.259	-0.07912	360.599	-0.23675	359.865	-0.16095	362.558	-0.14639	362.658	-0.18846	359.979
357.307	-0.28293	361.39	-0.15215	361.582	-0.08849	366.314	-0.08267	347.422	-0.12271	345.669	0.17149	362.351	-0.07098	360.691	-0.13983	359.958	-0.11836	362.651	-0.16835	362.751	-0.22438	360.072
357.4	-0.35971	361.482	-0.18695	361.675	-0.06813	366.406	-0.23778	347.515	-0.15804	345.761	0.14576	362.444	-0.14713	360.784	-0.10248	360.05		362.743	-0.17593	362.843	-0.09649	360.164	-0.09475
357.493	-0.31103	361.575	-0.17704	361.767	-0.11621	366.499	-0.2214	347.607	-0.16284	345.854	0.07997	362.537	-0.13089	360.877	-0.09675	360.143	-0.11936	362.836	-0.14218	362.936	-0.1103	360.257	-0.09978
357.585	-0.37054	361.667	-0.20901	361.86	-0.05112	366.592	-0.21917	347.7	-0.18791	345.947	0.09305	362.629	-0.14243	360.969		360.236	-0.11792	362.929	-0.14938	363.029		360.35	-0.12029
357.678	-0.24841	361.76	-0.16784	361.952	-0.03311	366.684	-0.26037	347.793	-0.18091	346.039		362.722	-0.14236	361.062		360.328	-0.17542	363.021		363.121		360.442	-0.23208
357.771	-0.23781	361.853	-0.12977	362.045		366.777	-0.15367	347.885	-0.10587	346.132	0.09869	362.815	-0.05476	361.155	-0.03346	360.421	-0.25021	363.114		363.214	-0.10805	360.535	-0.21521
357.863	-0.22116	361.945	-0.18795	362.138	-0.00258	366.87	-0.16562	347.978		346.224	0.094	362.907	-0.07611	361.247	-0.01646	360.513	-0.33647	363.207	-0.07283	363.306	-0.10783	360.627	-0.26293
357.956	-0.23175	362.038		362.23	-0.02646	366.962		348.07		346.519	0.54135	363		361.34	-0.04053	360.606	-0.31	363.299	-0.08057	363.399	-0.1711	360.72	-0.18894
358.048		362.131	-0.19642	362.323	-0.04497	367.055		348.163	-0.07521	346.611	0.36775	363.093		361.432	-0.05443	360.699	-0.19739	363.392	-0.18174	363.492	-0.14866	360.813	-0.13477
358.141	-0.35845	362.223	-0.13429	362.415	-0.04163	367.148	-0.125	348.256	-0.05564	346.704	0.04012	363.185	-0.02957	361.525	-0.04597	360.791	-0.14676	363.484	-0.17793	363.584	-0.14546	360.905	-0.12015
358.234	-0.07789	362.316	-0.10361	362.508	-0.07932	367.24	-0.10094	348.348	-0.04963	346.796	-0.02576	363.278	-0.09975	361.618	-0.05716	360.884	-0.12598	363.577	-0.12892	363.677	-0.17463	360.998
358.326	-0.24609	362.408	-0.12478	362.601	-0.11169	367.333	-0.11351	348.441	-0.06815	346.889	-0.12333	363.37	-0.11717	361.71	-0.04387	360.977		363.67	-0.12184	363.77	-0.11153	361.091
358.419	-0.40363	362.501	-0.22275	362.693	-0.24963	367.425	-0.19984	348.533	-0.05652	346.982		363.463	-0.11127	361.803	-0.0548	361.069		363.762	-0.08944	363.862	-0.1246	361.183	-0.03965
358.512	-0.2692	362.594	-0.17832	362.786	-0.17822	367.518	-0.23742	348.626	-0.10258	347.074		363.556	-0.17281	361.895	-0.02936	361.162	-0.08947	363.855	-0.14164	363.955	-0.14126	361.276	-0.06373
358.604	-0.12272	362.686	-0.23507	362.879	-0.15316	367.611	-0.04245	348.718	-0.04854	347.167		363.648	-0.12124	361.988		361.254	-0.09911	363.948	-0.13326	364.048		361.368	-0.1229
358.697	-0.23079	362.779	-0.18186	362.971		367.703	-0.19118	348.811	-0.03615	347.26	-0.09189	363.741	-0.0988	362.081		361.347	-0.11726	364.04		364.14	-0.10366	361.461	-0.13784
358.789	-0.13682	362.872	-0.15449	363.064		367.796	-0.15867	348.904	-0.03971	347.352	-0.11157	363.834	-0.11499	362.173	-0.0422	361.44	-0.16971	364.133	-0.09338	364.233	-0.11869	361.554	-0.14022
358.882	-0.37549	362.964		363.157	-0.13052	367.889	-0.11741	348.996		347.429	-0.1459	363.926	-0.08494	362.266	-0.03104	361.532	-0.20748	364.226	-0.11939	364.325	-0.13438	361.646	-0.11033
358.975		363.057		363.249	-0.09729	367.981		349.089		347.522	-0.15857	364.019		362.358	-0.05678	361.625	-0.16578	364.318	-0.11642	364.418	-0.19168	361.739	-0.12395
359.067		363.15	-0.08152	363.342	-0.09931	368.074		349.181	-0.01036	347.614	-0.28497	364.112		362.451	-0.0765	361.717	-0.21724	364.411	-0.16354	364.511	-0.18438	361.831	-0.06257
359.16	-0.18638	363.242	-0.07055	363.434	-0.18878	368.166	-0.12042	349.274	-0.0169	347.707	-0.20519	364.204	-0.07034	362.544	-0.10761	361.81	-0.10624	364.503	-0.18871	364.603	-0.2179	361.924	-0.07623
359.252	-0.13269	363.335	-0.13054	363.527	-0.19238	368.259	-0.07491	349.367	-0.05329	347.8	-0.21383	364.297	-0.06482	362.636	-0.08108	361.903	-0.1368	364.596	-0.20021	364.696	-0.18833	362.017
359.345	-0.1649	363.427	-0.15415	363.62	-0.17223			349.459	-0.00347	347.892	-0.18686	364.389	-0.12101	362.729	-0.1162	361.995		364.689	-0.10926	364.789	-0.17154	362.109
359.438	-0.26966	363.52	-0.17628	363.712	-0.19024			349.552	0.00174	347.985		364.482	-0.1634	362.822	-0.08536	362.088		364.781	-0.12917	364.881	-0.17734	362.202	-0.05338
359.53	-0.30408	363.613	-0.23359	363.805	-0.13289			349.649	-0.01594	348.077		364.575	-0.1868	362.914	-0.05965	362.18	-0.08744	364.874	-0.13392	364.974		362.294	-0.07246
359.623	-0.19515	363.705	-0.20008	363.898	-0.0799			349.742	-0.01954	348.17	-0.14606	364.667	-0.18681	363.007		362.273	-0.0885	364.967		365.067		362.387	-0.06825
359.716	-0.15279	363.798	-0.11549	363.991				349.835	-0.04297	348.263	-0.12847	364.76	-0.13107	363.1		362.366	-0.18017	365.059		365.159	-0.10214	362.48	-0.16218
359.808	-0.23781	363.891	-0.19033	364.083				349.927	-0.00853	348.355	-0.14714	364.853	-0.06771	363.192	-0.02998	362.458	-0.13537	365.152	-0.12509	365.252	-0.0805	362.572	-0.18027
359.901	-0.32147	363.983		364.176	-0.08403			350.02		348.448	-0.14644	364.945	-0.08459	363.285	-0.03019	362.551	-0.19237	365.245	-0.0975	365.344	-0.1052	362.665	-0.15999
359.993		364.076		364.268	-0.10343			350.113		348.54	-0.13231	365.038		363.378	-0.0779	362.644	-0.22021	365.337	-0.08531	365.437	-0.15479	362.758	-0.12161
360.086		364.169	-0.1797	364.361	-0.22071			350.205		348.633	-0.15023	365.131	-0.04795	363.47	-0.09773	362.736	-0.18832	365.43	-0.16825	365.53	-0.21052	362.85	-0.10748
360.179	-0.22238	364.261	-0.18253	364.454	-0.19928			350.298		348.726	-0.15811	365.223	-0.09848	363.563	-0.16492	362.829	-0.14524	365.522	-0.19037	365.622	-0.16215	362.943	-0.08794
360.271	-0.24578	364.354	-0.1771	364.546	-0.17338			350.39	0.01272	348.818	-0.11595	365.316	-0.11441	363.655	-0.11343	362.922	-0.11167	365.615	-0.20948	365.715	-0.15485	363.036
360.364	-0.09847	364.446	-0.23742	364.639	-0.19757			350.483	0.02099	348.911	-0.08712	365.408	-0.15198	363.748	-0.12847	363.014		365.708	-0.13414	365.808	-0.12493	363.128	-0.08563
360.456	-0.11319	364.539	-0.20894	364.731	-0.15179			350.575	0.05769	349.003		365.501	-0.20336	363.841	-0.10519	363.107		365.8	-0.14671	365.9	-0.14195	363.221	-0.0713
360.549	-0.26778	364.632	-0.19973	364.824	-0.10394			350.668	-0.00169	349.096		365.594	-0.25212	363.934	-0.05928	363.2	-0.13128	365.893	-0.15005	365.993		363.313	-0.05768
360.641	-0.25897	364.724	-0.16006	364.917	-0.10917			350.761	0.02169	349.188	-0.0824	365.686	-0.12919	364.026		363.292	-0.06497	365.986		366.086		363.406	-0.1325
360.734	-0.16821	364.817	-0.156	365.01				350.853	0.05423	349.281	-0.08929	365.779	-0.07159	364.119		363.385	-0.16865	366.079		366.178	-0.13582	363.499	-0.16363
360.827	-0.20176	364.91	-0.16357	365.102				350.946	0.01957	349.374	-0.1383	365.872	-0.09097	364.211	-0.07925	363.477	-0.23101	366.171	-0.11456	366.271	-0.12988	363.591	-0.1351
360.919	-0.24791	365.002		365.195	-0.07922			351.038		349.466	-0.08297	365.964		364.304	-0.05557	363.57	-0.24827	366.264	-0.12383	366.364	-0.16134	363.684	-0.14954
361.012		365.095		365.287	-0.15046			351.131	0.07942	349.559	-0.04731	366.057		364.397	-0.1818	363.663	-0.17135	366.357	-0.16521	366.456	-0.22727	363.777	-0.10657
361.105		365.188	-0.14086	365.38	-0.14926			351.224	0.07159	349.657	-0.228	366.15	-0.09261	364.489	-0.11955	363.755	-0.1837	366.449	-0.2428	366.549	-0.23024	363.869	-0.11793
361.197	-0.11326	365.28	-0.13164	365.473	-0.29514			351.316	0.01941	349.749	-0.22529	366.242	-0.09059	364.582	-0.20079	363.848	-0.1354	366.542	-0.19498	366.642	-0.20461	363.962
361.29	-0.2079	365.373	-0.13102	365.565	-0.17812			351.409	0.03326	349.842	-0.19019	366.335	-0.04534	364.675	-0.08826	363.941	-0.11387	366.634	-0.13828	366.734	-0.20051	364.055
361.382	-0.22341	365.465	-0.20563	365.658	-0.2867			351.501	0.10743	349.934	-0.20446	366.428	-0.1706	364.767	-0.08765	364.033		366.727	-0.17195	366.827	-0.19331	364.147	-0.08561
361.475	-0.1881	365.558	-0.20565	365.75	-0.15876			351.594	0.0095	350.027		366.52	-0.17603	364.86	-0.08198	364.126	-0.1188	366.82	-0.15851	366.92	-0.18586	364.24	-0.09789
361.568	-0.19781	365.651	-0.27635	365.843	-0.13479			351.686	-0.0027	350.12		366.613	-0.15675	364.953	-0.10534	364.219	-0.10819	366.912	-0.10679	367.012		364.333	-0.13067
361.66	-0.21024	365.743	-0.19271	365.936	-0.17188			351.779	0.09891	350.212		366.706	-0.14214	365.045		364.311	-0.11125	367.005		367.105		364.425	-0.19774
361.753	-0.1979	365.836	-0.14836	366.029				351.872	0.06277	350.305		366.798	-0.11873	365.138	-0.02007	364.404	-0.2486	367.098		367.198	-0.10524	364.518	-0.18843
361.846	-0.17386	365.929	-0.18155	366.121				351.964		350.397	-0.26271	366.891	-0.07758	365.23	-0.03066	364.496	-0.26238	367.19	-0.08188	367.29	-0.13525	364.61	-0.19353
361.938	-0.11348	366.021		366.214	-0.1256			352.057		350.49	-0.24716	366.984		365.323	-0.03889	364.589	-0.25765	367.283	-0.10877	367.383	-0.16904	364.703	-0.18704
362.031		366.114		366.307	-0.13324			352.15	0.08142	350.583	-0.23842	367.076		365.416	-0.07718	364.682	-0.2685	367.376	-0.18763	367.475	-0.33233	364.796	-0.073
362.123		366.207	-0.13734	366.399	-0.1238			352.242	0.08104	350.675	-0.29694	367.169	-0.08448	365.508	-0.17334	364.774	-0.16894	367.468	-0.22058	367.568	-0.21741	364.888	-0.12823
362.216	-0.25698	366.299	-0.12828	366.492	-0.1841			352.335	0.11729	350.768	-0.23814	367.262	-0.07083	365.601	-0.14344	364.867	-0.19794	367.561	-0.19452	367.661	-0.21159	364.981
362.309	-0.18338	366.392	-0.18928	366.584	-0.11011			352.427	-0.0354	350.86	-0.16425	367.354	-0.13538	365.693	-0.11576	364.96		367.653	-0.16865	367.753	-0.17673	365.074
362.401	-0.17599	366.485	-0.22585	366.677	-0.20985			352.52		350.953	-0.14197	367.447	-0.23062	365.786	-0.03682	365.052		367.746	-0.0916	367.846	-0.17353	365.166	-0.10987
362.494	-0.11999	366.577	-0.21794	366.77	-0.13588			352.613		351.045		367.539	-0.19163	365.879	-0.05376	365.145	-0.14124	367.839	-0.08971	367.939	-0.11872	365.259	-0.09553
362.586	-0.11514	366.67	-0.29594	366.862	-0.19471			352.705	0.03692	351.138	-0.12056	367.632	-0.1969	365.971		365.237	-0.11138	367.931	-0.09912	368.031		365.351	-0.10255
362.679	-0.18423	366.763	-0.1586	366.955	-0.12511			352.798	0.04863	351.231	-0.0964	367.725	-0.15291	366.064		365.33	-0.08807	368.024		368.124		365.444	-0.13409
362.772	-0.27118	366.855	-0.22655	367.048				352.89	0.06911	351.323	-0.09722	367.817	-0.13771	366.157	-0.03147	365.423	-0.16431	368.117		368.216	-0.13089	365.537	-0.19317
362.865	-0.22637	366.948	-0.15205	367.141	-0.13257			352.983		351.416	-0.26707	367.91	-0.08393	366.25	-0.02212	365.515	-0.24403	368.209	-0.08356	368.309	-0.12064	365.629	-0.19856
362.957	-0.29273	367.041		367.233	-0.13059			353.076		351.508	-0.29685	368.003		366.342	-0.12314	365.608	-0.23821	368.302	-0.08225			365.722	-0.17732
363.05		367.133	-0.08315	367.326	-0.14572			353.168	0.0703	351.601	-0.3875	368.095		366.435	-0.14605	365.701	-0.19699					365.815	-0.12427
363.142	-0.18713	367.226	-0.11239	367.418	-0.25824			353.261	0.10726	351.694	-0.29688	368.188	-0.0924	366.527	-0.1394	365.793	-0.15574					365.907	-0.11007
363.235	-0.24346	367.319	-0.11439	367.511	-0.22799			353.353	0.08111	351.786	-0.20924	368.281	-0.07282	366.62	-0.15511	365.886	-0.14321					366
363.328	-0.24689	367.411	-0.25536	367.604	-0.23454			353.446	0.05786	351.879	-0.15253			366.713	-0.1266	365.979						366.093
363.42	-0.16179	367.504	-0.31221	367.696	-0.21186			353.538	-0.67803	351.972				366.806	-0.06926	366.071						366.185	-0.07961
363.513	-0.13847	367.596	-0.25425	367.789	-0.16625			353.631	-0.73205	352.064				366.898	-0.08227	366.164	-0.13864					366.278	-0.10482
363.606	-0.21522	367.689	-0.20516	367.881	-0.1138			353.724	-0.42509	352.157	-0.11068			366.991		366.257	-0.10705					366.371	-0.17545
363.698	-0.155	367.782	-0.12561	367.974				353.816	-0.22373	352.249	-0.08802			367.084		366.349	-0.1906					366.463	-0.17943
363.791	-0.24327	367.874	-0.11625	368.067				353.909	-0.14225	352.342	-0.16129			367.176	-0.06258	366.442	-0.26122					366.556	-0.22054
363.884	-0.28043	367.967		368.159	-0.10547			354.002		352.435	-0.44256			367.269	-0.05899	366.535	-0.27131					366.649	-0.18841
363.976		368.06		368.252	-0.12413			354.094		352.527				367.361	-0.10114	366.627	-0.29416					366.741	-0.15281
364.069		368.152	-0.14161					354.187	-0.08476	352.62				367.454	-0.14115	366.72	-0.19137					366.834	-0.12482
364.161	-0.23398	368.245	-0.12481					354.279	-0.11608	352.712				367.547	-0.16837	366.813	-0.2247					366.927	-0.12086
364.254	-0.1022							354.372	-0.20277	352.805	-0.16271			367.639	-0.11258	366.905	-0.15219					367.019
364.347	-0.19633							354.465	-0.56322	352.897	-0.06262			367.732	-0.08282	366.998						367.112
364.439	-0.21749							354.557	-0.25008	352.99				367.824	-0.09114	367.091						367.205	-0.07328
364.532	-0.22221							354.65	-0.24302	353.083				367.917	-0.06349	367.183	-0.06602					367.297	-0.08167
364.625	-0.24259							354.743	-0.15677	353.175	-0.09036			368.01		367.276	-0.11273					367.39	-0.14016
364.717	-0.21562							354.835	-0.09043	353.268	-0.04036			368.102		367.369	-0.19307					367.483	-0.48077
364.81	-0.15557							354.928	-0.10728	353.36	-0.0907			368.195	-0.06509	367.461	-0.31748					367.575	-0.21134
364.903	-0.26032							355.02		353.453	-0.22576			368.288	-0.08043	367.554	-0.29113					367.668	-0.16131
364.995								355.113		353.545	-0.54925					367.646	-0.19548					367.76	-0.13984
365.088								355.206	-0.06593	353.638	-0.60404					367.739	-0.13987					367.853	-0.11146
365.18	-0.21412							355.298	-0.11354	353.731	-0.47926					367.832	-0.13276					367.946	-0.10071
365.273	-0.21321							355.391	-0.24508	353.823	-0.27689					367.924	-0.09916					368.038
365.366	-0.27005							355.483	-0.18833	353.916	-0.21316					368.017						368.131	-0.09171
365.458	-0.21702							355.576	-0.23779	354.009						368.11						368.224	-0.07477
365.551	-0.22089							355.669	-0.23347	354.101						368.202	-0.10658					368.316	-0.0691
365.643	-0.23978							355.761	-0.20313	354.194	-0.21562					368.295	-0.09767
365.736	-0.1671							355.854	-0.16177	354.287	-0.20056
365.829	-0.18323							355.947	-0.1389	354.379	-0.39235
365.922	-0.19874							356.039		354.472	-0.60947
366.014								356.132	-0.13588	354.564	-0.45793
366.107								356.224	-0.1025	354.657	-0.41727
366.2	-0.21597							356.317	-0.10306	354.75	-0.31084
366.292	-0.15295							356.41	-0.15408	354.842	-0.26701
366.385	-0.10378							356.502	-0.16813	354.935	-0.23798
366.478	-0.15493							356.595	-0.16186	355.028
366.57	-0.16235							356.687	-0.22198	355.12
366.663	-0.27032							356.78	-0.11931	355.213	-0.10674
366.756	-0.19748							356.873	-0.15264	355.305	-0.15655
366.848	-0.26513							356.965		355.398	-0.2226
366.941	-0.25183							357.058		355.491	-0.23719
367.034								357.151	-0.09947	355.583	-0.29314
367.126	-0.19301							357.243	-0.13624	355.676	-0.32408
367.219	-0.20052							357.336	-0.14503	355.768	-0.20952
367.311	-0.24218							357.428	-0.23496	355.861	-0.17629
367.404	-0.16845							357.521	-0.2286	355.954	-0.17594
367.497	-0.16061							357.614	-0.20802	356.046
367.589	-0.12037							357.706	-0.15373	356.139	-0.15858
367.682	-0.24007							357.799	-0.16079	356.232	-0.18296
367.775	-0.21077							357.892	-0.17995	356.324	-0.15093
367.867	-0.13218							357.984		356.417	-0.24301
367.96								358.077		356.509	-0.19896
368.052								358.17	-0.16262	356.602	-0.21292
368.145	-0.16503							358.262	-0.11855	356.695	-0.26197
368.238	-0.161							358.355		356.787	-0.20523
								358.448		356.88	-0.18522
								358.54		356.972
								358.633	-0.28032	357.065
								358.725	-0.19257	357.158	-0.1171
								358.818	-0.12096	357.25	-0.16164
								358.911	-0.14544	357.343	-0.19147
								359.003		357.436	-0.22857
								359.096		357.528	-0.24304
								359.188	-0.11903	357.621	-0.23929
								359.281	-0.14254	357.714	-0.22316
								359.374	-0.12124	357.806	-0.19
								359.466	-0.19555	357.899	-0.18472
								359.559	-0.22163	357.991
								359.651	-0.20352	358.084
								359.744	-0.13148	358.177	-0.13771
								359.837	-0.11265	358.269	-0.14663
								359.929	-0.11968	358.362
								360.022		358.455
								360.114		358.547
								360.207	-0.09253	358.64	-0.33022
								360.3	-0.09712	358.732	-0.24739
								360.392	-0.17658	358.825	-0.16657
								360.485	-0.18989	358.918	-0.20164
								360.577	-0.26553	359.01
								360.67	-0.25624	359.103
								360.763	-0.16206	359.195	-0.13497
								360.855	-0.1259	359.288	-0.13322
								360.948	-0.10953	359.381	-0.15856
								361.041		359.473	-0.22551
								361.133	-0.01832	359.566	-0.23339
								361.226	-0.10259	359.659	-0.2314
								361.318	-0.12207	359.751	-0.15666
								361.411	-0.09754	359.844	-0.13197
								361.504	-0.12657	359.936	-0.12737
								361.596	-0.12145	360.029
								361.689	-0.12057	360.122
								361.782	-0.11728	360.214	-0.12147
								361.874	-0.10448	360.307	-0.13364
								361.967		360.399	-0.18074
								362.059		360.492	-0.21012
								362.152	-0.11688	360.585	-0.25328
								362.245	-0.05191	360.677	-0.28173
								362.337	-0.05798	360.77	-0.1844
								362.43	-0.14347	360.862	-0.17306
								362.522	-0.22362	360.955	-0.17435
								362.615	-0.17371	361.048
								362.708	-0.19606	361.14	-0.06289
								362.8	-0.11426	361.233	-0.06923
								362.893	-0.1193	361.326	-0.06524
								362.986		361.418	-0.13732
								363.078		361.511	-0.08442
								363.171	-0.09074	361.603	-0.1187
								363.264	-0.09261	361.696	-0.20033
								363.356	-0.14037	361.789	-0.1379
								363.449	-0.11932	361.881	-0.1377
								363.541	-0.21948	361.974
								363.634	-0.19061	362.066
								363.727	-0.15331	362.159	-0.06847
								363.819	-0.13768	362.252	-0.11493
								363.912	-0.10989	362.344	-0.11558
								364.005		362.437	-0.11862
								364.097		362.53	-0.18971
								364.19	-0.13413	362.622	-0.20126
								364.283	-0.10373	362.715	-0.19633
								364.375	-0.24728	362.808	-0.15003
								364.468	-0.16477	362.9	-0.11036
								364.56	-0.3015	362.993
								364.653	-0.24885	363.086
								364.746	-0.18418	363.178	-0.10012
								364.838	-0.12146	363.271	-0.10497
								364.931	-0.12444	363.363	-0.13863
								365.024		363.456	-0.14455
								365.116		363.548	-0.1795
								365.209	-0.10933	363.641	-0.23885
								365.302	-0.11072	363.734	-0.11312
								365.394	-0.17291	363.827	-0.0974
								365.487	-0.25896	363.919	-0.09536
								365.579	-0.23663	364.012
								365.672	-0.20586	364.104
								365.765	-0.13389	364.197	-0.10947
								365.857	-0.17097	364.29	-0.08213
								365.95	-0.11769	364.382	-0.17656
								366.043		364.475	-0.16676
								366.135	-0.1142	364.568	-0.21446
								366.228	-0.12279	364.66	-0.21584
								366.321	-0.118	364.753	-0.15687
								366.413	-0.2028	364.846	-0.16895
								366.506	-0.23399	364.938	-0.16279
								366.599	-0.2353	365.031
								366.691	-0.20696	365.123
								366.784	-0.1795	365.216	-0.08339
								366.877	-0.12238	365.309	-0.11003
								366.969		365.401	-0.12414
								367.062		365.494	-0.15036
								367.155	-0.08103	365.587	-0.17858
								367.247	-0.10194	365.679	-0.17175
								367.34	-0.11645	365.772	-0.15012
								367.433	-0.24632	365.865	-0.13525
								367.525	-0.24688	365.957	-0.11784
								367.618	-0.23206	366.05
								367.71	-0.16423	366.143	-0.12662
								367.803	-0.1193	366.235	-0.1448
								367.896	-0.12127	366.328	-0.16851
								367.988		366.421	-0.1853
								368.081		366.513	-0.16288
								368.174	-0.14626	366.606	-0.24644
								368.266	-0.10539	366.699	-0.22362
										366.791	-0.16338
										366.884	-0.12561
										366.977
										367.069
										367.162	-0.07483
										367.254	-0.09712
										367.347	-0.14536
										367.44	-0.16543
										367.532	-0.18599
										367.625	-0.21097
										367.718	-0.16433
										367.81	-0.13456
										367.903	-0.08525
										367.995
										368.088
										368.181	-0.04869
										368.273	-0.05775

## Sheet: C3H8OS
DoY S1.1	C3H8OS fluxes S1.1	DoY S1.2	C3H8OS fluxes S1.2	DoY S1.3	C3H8OS fluxes S1.3	DoY S2.1	C3H8OS fluxes S2.1	DoY S2.2	C3H8OS fluxes S2.2	DoY S2.3	C3H8OS fluxes S2.3	DoY S3.1	C3H8OS fluxes S3.1	DoY S3.2	C3H8OS fluxes S3.2	DoY S3.3	C3H8OS fluxes S3.3	DoYS4.1	C3H8OS fluxes S4.1	DoY S4.2	C3H8OS fluxes S4.2	DoY S4.3	C3H8OS fluxes S4.3
	micromol/(m2 h)		micromol/(m2 h)		micromol/(m2 h)		micromol/(m2 h)		micromol/(m2 h)		micromol/(m2 h)		micromol/(m2 h)		micromol/(m2 h)		micromol/(m2 h)		micromol/(m2 h)		micromol/(m2 h)		micromol/(m2 h)
244.189	-0.02553	244.197	0.00424	244.205	0.01504	244.212	0.00695	244.22	0.00314	244.228	-0.00264	244.236	-0.01783	244.244	-0.00659	244.154	-0.00363	244.162	-0.02361	244.17	0.00532	244.178	0.01793
244.286	-0.00993	244.294	-0.000818402	244.302	-0.00253	244.31	-0.001	244.318	-0.00721	244.326	-0.000929913	244.333	0.00897	244.341	-0.00454	244.251	0.00308	244.259	0.00783	244.267	0.00201	244.275	0.01903
244.384	0.01002	244.392	-0.00368	244.399	0.01226	244.407	0.01971	244.415	0.00216	244.423	0.00156	244.431	-0.00307	244.439	0.000183003	244.349	0.01123	244.357	0.01015	244.365	0.000753883	244.372	0.00239
244.481	-0.01219	244.489	0.00533	244.497	-0.00727	244.505	-0.00407	244.513	0.01169	244.52	-0.00628	244.528	0.00768	244.536	-0.00165	244.446	-0.0102	244.454	0.00233	244.462	0.01052	244.47	0.00388
244.579	0.00276	244.587	0.00316	244.594	0.01185	244.602	-0.000720954	244.61	0.005	244.618	-0.09718	244.626	-0.00173	244.633	-0.000652971	244.544	-0.00124	244.552	-0.000608615	244.56	0.00241	244.567	-0.00535
244.676	-0.00453	244.684	0.00993	244.692	-0.00476	244.7	-0.000264296	244.707	0.00685	244.715	0.000351257	244.723	-0.00114	244.731	-0.00818	244.641	0.00581	244.649	-0.09016	244.657	-0.00182	244.665	0.00674
244.774	0.00148	244.781	0.00144	244.789	0.00367	244.797	-0.0899	244.805	-0.00206	244.813	-0.00433	244.82	-0.000172296	244.828	-0.000245854	244.739	-0.01354	244.747	0.00227	244.754	-0.00445	244.762	-0.0068
244.871	0.00415	244.879	-0.000988624	244.887	-0.000106478	244.894	0.000425102	244.902	0.00187	244.91	-0.00339	244.918	0.00401	244.926	0.000145668	244.836	-0.0067	244.844	0.00765	244.852	0.00155	244.86	0.00538
244.968		244.976		244.984		244.992		245		245.007		245.015		245.023		244.933	0.00166	244.941	0.00196	244.949	0.00161	244.957	0.00117
245.066		245.073		245.081		245.089		245.097		245.105		245.113		245.12		245.031		245.039		245.046		245.054
245.163	0.00211	245.171	0.00283	245.179	0.0169	245.187	-0.00428	245.194	-0.00124	245.202	-0.000846461	245.21	-0.00392	245.218	-0.00090923	245.128	0.00212	245.136	0.00455	245.144	0.000850999	245.152	-0.00163
245.26	-0.00464	245.268	0.000615196	245.276	0.00204	245.6	0.02133	245.604	-0.00271	245.608	0.00249	245.612	0.01027	245.616	-0.00438	245.226	0.00337	245.233	-0.000526902	245.241	0.00209	245.249	0.000997951
245.453	-0.02069	245.592	-0.00168	245.596	0.01179	245.711	-0.01186	245.721	-0.029	245.732	0.02955	245.746	-0.00858	245.757	-0.05953	245.62	0.00865	245.624	0.00153	245.628	0.0082	245.5	-0.00658
245.461	0.00586	245.689	0.00643	245.7	0.04926	245.716		245.727		245.738		245.752		245.763		245.768	0.11218	245.779	0.00862	245.79	0.10954	245.508	0.00384
245.469	0.000653482	245.694		245.705		245.862		245.869		245.876		245.883		245.89	-0.06417	245.774		245.784		245.795		245.516	0.00853
245.477	0.00321	245.848		245.855	0.18406	245.951		245.958		245.965		245.972		245.979		245.898		245.905		245.912		245.524	0.00232
245.485	0.00539	245.937		245.944		246.04		246.047		246.054		246.061		246.069		245.987		245.994		246.001		245.538
245.492	-0.00531	246.026		246.033		246.129		246.136		246.143		246.151		246.158		246.076		246.083		246.09		245.546	-0.0073
245.588	0.000760528	246.115		246.122		246.218		246.225		246.233		246.24		246.247		246.165		246.172	-0.000712466	246.179		245.554
245.678	-0.05171	246.204		246.211		246.308		246.315		246.322		246.329		246.336		246.254		246.261		246.268		245.563
245.684		246.293		246.3		246.397		246.404		246.411		246.418		246.425		246.343		246.35		246.357		245.568
245.841		246.382		246.39		246.486		246.493		246.5		246.507		246.514		246.432		246.439		246.447		245.574	-0.06796
245.93		246.472		246.479		246.575	-0.0012	246.582		246.589		246.596		246.603		246.521		246.529		246.536		245.578
246.019		246.561		246.568		246.664	0.01315	246.671	-0.00614	246.702		246.709	0.00684	246.716	0.01185	246.611		246.618		246.625		245.582	0.02376
246.108		246.65		246.657	-0.00191	246.859	-0.00225	246.866		246.873		246.884	-0.04785	246.891	-0.00564	246.723	0.05744	246.731	-0.0149	246.738		245.632	-0.01427
246.197		246.815	-0.01421	246.848		246.962		246.969		246.976		246.987		246.994		246.898		246.909		246.916		245.8	0.04261
246.286		246.822		246.951	0.00931	247.065		247.072		247.079		247.09		247.097		247.001		247.012		247.019		245.806
246.375		246.841	-0.01802	247.055		247.168	-0.00449	247.176	0.00354	247.183	-0.00705	247.193	-0.00363	247.2	0.00426	247.104		247.115		247.122		245.919
246.464		246.944	-0.02917	247.158	0.00128	247.272	-0.13962	247.279	0.00978	247.286	0.00262	247.296	0.01278	247.304	0.01028	247.208	-5.90512e-05	247.218	-0.02639	247.225	-0.00665	246.008
246.554		247.048		247.261	-0.00625	247.602	0.00398	247.61	-0.00311	247.617	-0.00395	247.627	-0.00663	247.634	-0.000698289	247.311	-6.17152e-05	247.321	-0.00176	247.329	-0.02457	246.097
246.643		247.151	-0.2717	247.364	-0.000630944	247.706	-0.00262	247.713	0.01496	247.72	-0.05229	247.731	-0.01305	247.738	0.03753	247.642	0.01402	247.652	0.02265	247.659	0.00362	246.186
246.756		247.254	0.00522	247.592	-0.0031	247.809	-0.02197	247.816		247.823	-0.00474	247.834	-0.000790739	247.841	0.00956	247.745	0.00101	247.755	0.01836	247.763	-0.04195	246.275
246.801	0.03836	247.357	-0.01146	247.695	-0.00791	247.912	0.02314	247.919	-0.00875	247.926	0.04981	247.937	0.01115	247.944	0.00324	247.848	-0.00496	247.859	0.06969	247.866	-0.0075	246.365
246.808		247.585	-0.01393	247.798	0.0035	248.015		248.022		248.029		248.04		248.047		247.951	0.01599	247.962		247.969		246.454
246.834	-0.000299304	247.688	-0.00848	247.901	-0.01358	248.118		248.125	-0.0205	248.132	-0.18713	248.143	0.02451	248.15	-0.0067	248.054		248.065		248.072		246.543
246.937	-0.00481	247.791	-0.18751	248.004		248.221	0.01765	248.229		248.236	0.09073	248.246	0.03224	248.253	-0.30088	248.157	0.02337	248.168	-0.0185	248.175	-0.03987	246.632
247.04		247.894	-0.00539	248.108		248.325	0.00235	248.332	0.00834	248.339	0.00488	248.35	-0.00248	248.357	0.000567358	248.261	-0.31393	248.271	-0.02523	248.278	-0.000275888	246.745
247.144	-0.06263	247.997		248.211	0.02514	248.428		248.435		248.442		267.796	0.03013	267.803	0.02684	248.364	-0.01491	248.374	-0.000274386	248.382	0.00231	246.923	0.00108
247.247	-0.00181	248.1		248.314	0.00198	275.796	0.00268	248.878	0.01941	248.885		267.888	-0.00575	267.895	-0.00595	267.81	0.00367	267.817	-0.00287	267.824	0.00226	247.026
247.35	-0.01925	248.204	-0.01641	248.417		275.889	0.01925	248.895	-0.00859	248.902	-0.04555	267.981		267.988		267.903	0.00285	267.91	-0.00634	267.917	-0.00117	247.129	-0.00526
247.577	-0.00554	248.307	-0.00337	267.767	0.01531	275.981		248.913	-0.03776	248.92	-0.03426	268.073		268.081		267.995		268.002		268.009		247.233	0.00132
247.681	-0.0433	248.41	-0.000656704	267.86	0.00874	276.074		248.931	-0.00589	248.938	-0.01805	268.166	0.000779677	268.173	-0.00342	268.088		268.095		268.102		247.336	0.03676
247.784	0.01367	267.76	0.01014	267.952	0.0238	276.167		248.949	-0.00164	248.956	0.07616	268.259	0.00333	268.266	0.01077	268.18	0.01117	268.187	0.00912	268.195	-0.01556	247.667	0.05021
247.887	-0.10043	267.853	0.0099	268.045		276.259		248.966		248.974		268.351	0.00807	268.358	-0.00446	268.273	-0.00453	268.28	-0.00291	268.287	0.0047	247.77	0.00104
247.99		267.945	0.02327	268.138	-0.000116881	276.352		248.984		248.991		268.492	0.0086	268.499	0.01315	268.365	-0.01206	268.372	-0.00581	268.38	0.00111	247.873	-0.00357
248.093		268.038		268.23	0.01136	276.444		249.002		249.009		268.587	-0.00122	268.594	-0.00533	268.506	0.00023458	268.513	-0.00272	268.521	-0.00895	247.976
248.196	0.05925	268.13	-0.000998557	268.323	0.00523	276.537		249.02		249.027		268.68	0.02051	268.687	0.12334	268.602	-0.0033	268.609	-0.00933	268.616	-0.02506	248.079
248.3	-0.0108	268.223	0.00873	268.415	0.00283	276.63		249.037		249.045		268.773	0.04632	268.78	-0.00589	268.694	0.10504	268.701	-0.00285	268.708	0.00378	248.182	0.00112
248.403	-0.0113	268.315	0.0063	268.463	-8.73574e-05	276.722		249.055		249.062		268.865	-0.01015	268.872	-0.01765	268.787	-0.01902	268.794	-0.00249	268.801	-0.0124	248.286	0.00208
266.605	-0.07527	268.408	0.00318	268.559	-0.00847	276.815		249.073		249.08		268.958	-0.0061	268.965		268.879	-0.00407	268.887	0.0089	268.894	0.000328745	248.389	-0.000308863
266.622	-0.01107	268.456	0.01624	268.651	0.0192	276.903		249.091		249.098		269.05		269.057		268.972		268.979		268.986		267.831	-0.000184871
266.64	0.01414	268.552	0.0061	268.744	0.00156	276.996		249.108		249.116		269.143	-0.00418	269.15	0.01052	269.065		269.072		269.079		267.924	0.02334
267.753	0.00719	268.644	0.01144	268.837	-0.00483	277.088		249.126	0.01102	249.133	0.02623	269.235	-0.00533	269.243	0.00199	269.157	0.01178	269.164	-0.00902	269.171	0.01004	268.016
267.845	-0.00603	268.737	-0.01611	268.929	0.00209	277.181	-0.00144	249.144	0.01271	249.151	0.01786	269.328	-0.0025	269.335	0.00516	269.25	-0.00192	269.257	-0.0131	269.264	0.00925	268.109
267.938	0.01005	268.829	0.02597	269.022		277.274	0.01407	249.162	-0.02	249.169	0.00586	269.421	-0.05808	269.428	0.03101	269.342	-0.03332	269.349	-6.54638e-05	269.356	0.00173	268.202	0.000108292
268.031		268.922	-0.01367	269.114		277.366	0.02406	249.18	0.00389	249.187	0.02056	269.513	-0.000314999	269.52		269.435	-0.0142	269.442	-0.05828	269.449	-0.01204	268.294	-0.00174
268.123		269.015		269.207	0.0144	277.506	-0.00815	249.197	0.00307	249.204	0.0047	269.606	-0.03248	269.613	0.01239	269.527	-0.00999	269.534	0.07984	269.542	-0.01889	268.387	-0.000197025
268.216	0.01122	269.107		269.299	0.01747	277.599	-0.00356	249.215	0.00347	249.222	0.00694	269.698	-0.0035	269.705	0.00122	269.62	0.00961	269.627	-0.02684	269.634	-0.11997	268.528	0.00775
268.308	0.00756	269.2	0.00929	269.392	0.02574	277.691	0.00273	249.233	0.01198	249.24	-0.00668	269.81	0.00788	269.817	-0.00717	269.713	-0.00587	269.72	0.021	269.727	-0.00876	268.623	0.01222
268.401	-0.01711	269.292	0.01086	269.485	0.04707	277.784	0.01153	249.251	-0.00941	249.258	0.000789906	269.903	-0.02783	269.91	-0.02088	269.824	-0.01963	269.832	-0.00998	269.839	0.00171	268.716	0.087
268.449	0.00672	269.385	0.02813	269.577	-0.01474	277.877	-0.00592	249.268	-0.01715	249.276	7.54316e-05	269.995		270.002		269.917	-0.00892	269.924	-0.00706	269.931	-0.00999	268.808	-0.00599
268.544	-0.00307	269.477	-0.00553	269.67	0.01823	277.969		249.286	0.01155	249.293	0.0064	270.088		270.095		270.01		270.017		270.024		268.901	0.02588
268.637	-0.00662	269.57	0.03838	269.782	0.0027	278.061		249.304	-0.00743	249.311	0.01252	270.18	-0.000602052	270.188	-0.00372	270.102		270.109		270.116		268.993
268.73	-0.00843	269.663	-0.03144	269.874	0.00467	278.154	0.0029	249.34	0.00124	249.347	0.01246	270.273	0.01278	270.28	-0.00329	270.195	-0.00984	270.202	-0.00251	270.209	0.00443	269.086
268.822	-0.00677	269.775	0.02025	269.967		278.246	0.0132	249.354	-0.00244	249.361	0.01282	270.365	-0.00692	270.373	0.00166	270.287	-0.00377	270.294	0.00203	270.301	-0.00161	269.178	-0.00212
268.915	0.00705	269.867	-0.02528	270.059		278.34	0.0062	249.368	0.00291	249.375	0.000371265	270.458	-0.06827	270.465	0.01193	270.38	-0.00217	270.387	0.0125	270.394	0.00336	269.271	-0.00453
269.008		269.96		270.152	-0.00154	278.432	0.00952	249.386	-0.00345	249.407	0.01239	270.551	0.000822082	270.558		270.472	-0.00147	270.479	-0.0079	270.487	0.000667496	269.364	0.02653
269.1		270.052		270.244	0.00943	278.524	0.00864	249.4	0.00153	249.422	0.01178	270.643		270.65	0.00992	270.565	0.03182	270.572	0.000268042	270.579	-0.00349	269.456	0.0187
269.193	-0.00886	270.145	0.00204	270.337	0.00162	278.617	-0.00898	249.415	-0.0093	249.439	0.01126	270.736	0.01992	270.743	-0.01049	270.658	-0.0143	270.665	-0.000709146	270.672	0.05119	269.549	0.03478
269.285	0.00788	270.237	0.00368	270.429	0.000325752	278.709	0.00123	249.432	0.000577164	249.454	0.01397	271.432	0.00242	271.439	-0.03246	270.75	-0.03272	271.453	-0.00744	271.46	0.00859	269.641	0.11983
269.378	-0.00705	270.33	0.00501	270.522	-0.05711	278.817	-0.0011	249.447	-0.00878	249.468	0.00478	271.525	0.02884	271.532	-0.08085	271.446	-0.04178	271.546	0.0146	271.553	-0.00673	269.734	-0.00478
269.47	-0.12618	270.422	0.01182	270.615	-0.1303	278.91	0.0035	249.461	0.01002	249.486	0.000736726	271.617	-0.04212	271.624	-0.00407	271.539	-0.09627	271.638	-0.15208	271.646	0.00777	269.846	-0.00309
269.563	-0.09298	270.515	0.09658	270.707	-0.07638	279.002		249.479	-0.02215	249.5	0.03027	271.71	-0.00798	271.717	-0.00566	271.631	0.000692791	271.731	-0.02052	271.738	0.00579	269.938	0.01102
269.656	0.01955	270.608	-0.0051	271.403	0.02974	279.095		249.493	0.00197	249.514	0.01718	271.802	0.00334	271.809	0.00153	271.724	0.000438795	271.823	-0.03519	271.831	-0.00469	270.031
269.748	0.000335463	270.7	0.00703	271.496	-0.0096	279.187		249.507	-0.08599	249.532	0.0061	271.895	0.02591	271.902	0.0209	271.816	0.01381	271.916	-0.02272	271.923	-0.00783	270.124
269.767	0.04611	271.396	0.00949	271.589	0.01742	279.28		249.525	-0.0209	249.546	-0.0095	271.987		271.994		271.909	-0.00753	272.009		272.016		270.216	0.00424
269.86	0.000977836	271.489	-0.0181	271.681	0.02174	279.356		249.539	-0.00821	249.561	0.00859	272.08		272.087		272.001		272.101		272.108		270.309	0.00216
269.952	-0.03274	271.581	-0.07439	271.774	0.01546	279.415	-0.00108	249.553	0.01601	249.578	0.01993	272.172	0.01168	272.179	0.00181	272.094		272.194	-0.01457	272.201	0.00437	270.401	-0.00297
270.045		271.674	-0.03857	271.866	0.02047	279.465	-0.02621	249.571	-0.00435	249.593	0.01203	272.265	0.01477	272.272	-0.00555	272.187	-0.00119	272.286	-0.03035	272.293	0.00357	270.494	0.01137
270.138	-0.01303	271.766	0.01355	271.959		279.516	-0.00242	249.585	-0.10147	249.607	0.01129	272.357	0.01288	272.365	-0.0141	272.279	-0.00164	272.379	-0.02304	272.386	0.00112	270.586	0.01109
270.23	0.0075	271.859	-0.00199	272.051		279.585	0.000373206	249.6	0.01005	249.625	0.00363	272.45	0.01703	272.457	0.0177	272.372	-0.00656	272.471	-0.01366	272.479	0.01359	270.679	-0.01319
270.323	-0.00642	271.952	0.0016	272.144	-0.01188	279.668	0.00625	249.618	0.08736	249.639	-0.00281	272.543	0.0132	272.55	0.00503	272.464	-0.02046	272.564	-0.01688	272.571	-0.00457	271.468	-0.04733
270.415	0.01134	272.044		272.236	-0.02417	279.716	0.01434	249.632	0.06296	249.653	0.0215	272.635	-0.01955	272.642	0.00575	272.557	-0.02429	272.656	-0.02054	272.664	-0.000451422	271.56	-0.00787
270.508	-0.0024	272.137	0.00874	272.329	-0.02095	279.765	-0.00971	249.646	0.00866	249.671	0.00778	272.728	0.00609	272.735	0.00718	272.649	0.00412	272.749	-0.01749	272.756	0.00653	271.653	0.1079
270.6	-0.01707	272.229	0.01096	272.421	0.00998	279.813	0.00115	249.664	-0.00524	249.685	0.01229	272.82	0.01575	272.827	0.00704	272.742	0.00466	272.841	-0.00958	272.849	0.02258	271.745	0.00838
270.693	-0.01359	272.322	0.01508	272.514	0.00257	279.862	0.02414	249.678	-0.00304	249.7	-0.06608	272.913	0.00275	272.92	0.00564	272.834	-0.01063	272.934	-0.01693	272.941	0.00432	271.838	-0.012
271.389	0.00971	272.414	0.0025	272.607	-0.00374	279.888	0.03199	249.692	6.86944e-05	249.717	-0.00466	273.005		273.012		272.927	-0.00828	273.027		273.034		271.93	0.02069
271.482	0.02837	272.507	0.01367	272.699	-0.00352	279.981		249.71	0.00447	249.732	-0.01245	273.098		273.105		273.02		273.119		273.126	0.00448	272.023
271.574	-0.00549	272.599	0.0039	272.792	0.00895	280.073		249.725	0.01182	249.746	0.01149	273.19	-0.00392	273.197	-0.000353533	273.112		273.212	-0.0177	273.219	0.00491	272.115
271.667	0.01883	272.692	0.00309	272.884	0.02437	280.166	0.00102	249.739	0.00162	249.764	-0.01705	273.283	0.02208	273.29	0.00636	273.205	0.00732	273.304	-0.00869	273.311	0.00466	272.208	0.00852
271.759	-0.00441	272.784	0.01418	272.977		280.258	0.000703891	249.757	-0.00643	249.778	0.00917	273.375	0.00378	273.382	0.00259	273.297	0.00498	273.397	-0.00089707	273.404	-0.00148	272.301	0.00587
271.852	-0.01062	272.877	-0.01517	273.069		280.347	0.00484	249.771	0.00806	249.792	-0.00208	273.468	0.01434	273.475	0.01446	273.389	0.00768	273.489	-0.0098	273.496	0.00637	272.393	0.000155187
271.944	-0.000768852	272.97		273.162	0.01019	280.392	-0.01247	249.785	0.00299	249.81	0.00649	273.56	0.0085	273.568	-5.22876e-05	273.482	-0.00623	273.582	-0.00758	273.589	0.01228	272.486	0.02393
272.037		273.062		273.254	0.00658	280.437	-0.00523	249.803	0.01189	249.824		273.652	-0.03867	273.659	-0.00935	273.575	0.00766	273.673	-0.005	273.68	0.0046	272.578	-0.01374
272.129	-0.01047	273.155	0.00787	273.347	-0.01317	280.482	0.00779	249.817	-0.00444	249.839	0.00778	273.744	0.00349	273.751	-0.09644	273.666	-0.000448357	273.766	-0.01401	273.773	0.00607	272.671	-0.00704
272.222	-0.00145	273.247	-0.00216	273.439	0.01637	280.538	0.00467	249.831	0.01164	249.856	-0.01001	273.837	-0.01526	273.844	0.01576	273.759	0.00504	273.858	-0.000237609	273.865	0.014	272.763	0.00615
272.315	0.00824	273.34	0.00358	273.532	-0.0438	280.63	0.01209	249.849	-0.00575	249.871	0.00298	273.93	-0.00898	273.937	-0.01556	273.851	-0.00303	273.951	-0.04068	273.958	0.004	272.856	0.000578002
272.407	0.00556	273.432	0.000143659	273.623	0.01623	280.723	0.0082	249.863	-0.02023	249.885	0.00879	274.022		274.029		273.944	0.01933	274.043		274.051		272.948	0.00497
272.5	-0.000819267	273.525	-0.00399	273.716	0.00456	280.835	0.01429	249.878	0.01421	249.903	0.00842	274.115		274.122		274.036		274.136	-0.00201	274.143	-0.00732	273.041
272.592	0.00196	273.616	0.00852	273.808	-0.01312	280.927	0.00815	249.895	-0.02945	249.917		274.207	0.01587	274.214	0.01964	274.129	-0.00494	274.229	-0.01413	274.236	-0.00817	273.133	0.00111
272.685	0.000920202	273.709	0.00506	273.901	0.00703	281.02		249.91	0.02739	249.931	0.01443	274.3	0.00438	274.307	0.00389	274.221	0.01162	274.321	-0.01861	274.328	-0.00682	273.226	0.00206
272.777	0.01204	273.801	0.00173	273.994		281.113		249.924	-0.00231	249.949	0.000662198	274.392	-0.01426	274.4	0.000938032	274.314	-0.01132	274.485	0.00905	274.492	0.0041	273.318	0.00846
272.87	0.00402	273.894	0.00416	274.086		281.205	0.02325	249.942	0.01001	249.963		274.463	-0.04693	274.47	0.00229	274.407	-0.0068	274.577	-0.01102	274.584	0.01281	273.411	-0.00166
272.963		273.986		274.179	0.02485	281.297	-0.00136	249.956	-0.264	249.977		274.556	-0.00504	274.563	0.0269	274.478	0.04731	274.67		274.677		273.503	0.00718
273.055		274.079		274.271	0.00267	281.392	0.00193	249.97		249.995		274.648	0.01031	274.656		274.57	0.00554	275.839	-0.11134	275.846	-0.00263	273.596	0.00607
273.148	0.0046	274.172	0.00818	274.364	0.00696	281.485	0.00242	249.988		250.009		275.818	-0.01103	274.812	0.00608	274.663		275.932	0.000182102	275.939	0.00585	273.687	0.0011
273.24	0.00968	274.264	-0.00261	274.435	0.02959	281.581	0.00847	250.002		250.023		275.91	0.00871	274.954	0.00174	274.835	0.00328	276.024		276.031		273.78	0.01068
273.332	0.00511	274.357	0.01011	274.527	0.03767	281.676	0.01117	250.016		250.041		276.003		275.096		274.976		276.117		276.124		273.873	0.000823195
273.425	-0.00137	274.428	0.00965	274.62	0.02047	281.825	0.0107	250.034		250.055		276.095		275.237	0.00327	275.118		276.209		276.216		273.965
273.518	0.00221	274.52	0.0159	274.713	-0.00304	281.917	-0.00592	250.048		250.07		276.188		275.379	0.00547	275.26	0.00331	276.302		276.309		274.058
273.609	-0.00395	274.613	0.01495	275.789	-0.17823	282.01		250.063		250.087		276.281		275.521	0.0192	275.402	0.0031	276.395		276.402		274.15	0.00939
273.702	0.00208	274.706	0.01422	275.882	0.00138	282.102		250.08		250.102		276.373		275.662	0.00384	275.543	0.00448	276.487		276.494		274.243	-0.00323
273.794	0.00462	275.782	0.02348	275.974		282.195	0.00407	250.095		250.116		276.466		275.825	0.00993	275.685	0.00293	276.58		276.587		274.336	-0.000649284
273.887	-0.01809	275.875	0.03197	276.067		282.336	0.00145	250.109		250.134		276.558		275.917	0.00488	275.832	0.00146	276.672		276.679		274.499	-0.00172
273.979		275.967		276.159		282.428	0.01397	250.127		250.148		276.651		276.01		275.924	-0.00949	276.765		276.772		274.592	-0.0077
274.072		276.06		276.252		282.521	-0.00225	250.141		250.162		276.743		276.103		276.017		276.857		276.864		274.684
274.164	0.01319	276.152		276.345		282.613	-0.00312	250.155		250.18	0.00815	276.836		276.195		276.11		276.946		276.953		274.857	0.00404
274.257	-0.000433882	276.245		276.437		282.712	-0.01434	250.173	0.000359919	250.194	0.00725	276.925		276.288		276.202		277.039		277.046		274.999
274.35	-0.01299	276.337		276.53		282.804	-0.00961	250.187	0.00308	250.209	-0.00161	277.017		276.38		276.295		277.131	0.00013015	277.138	-0.01162	275.141	0.00322
274.421	0.01578	276.43		276.622		282.897	-0.01223	250.201	-0.00417	250.226	-0.00446	277.11		276.473		276.387		277.224	0.00202	277.231	0.01039	275.282	0.00388
274.513	-0.01248	276.523		276.715		282.989		250.219	-0.0119	250.241	0.00342	277.202	0.02029	276.565		276.48		277.316	-0.00865	277.323	-0.00742	275.424	0.00296
274.606	-0.00714	276.615		276.807		283.082		250.233	-0.00427	250.255	0.01756	277.295	0.01241	276.658		276.573		277.409	-0.00121	277.426	0.02109	275.566	0.00125
274.698	0.00107	276.708		276.896		283.174	0.00365	250.248	0.00763	250.273	-0.00455	277.387	0.01006	276.751		276.665		277.549	0.06866	277.556	-0.12289	275.707	-0.00304
274.745	0.00429	276.8		276.989		283.267	0.0028	250.265	-0.000409171	250.287	-0.00816	277.528		276.843		276.758		277.642	-0.02378	277.649	-0.00417	275.853	-0.00558
274.887	0.00442	276.889		277.081		283.359	-0.01003	250.28	0.01641	250.301	0.00429	277.62	-0.00712	276.932		276.85		277.734	-0.01718	277.741	-0.01399	275.946	0.00252
275.028		276.982		277.174	0.02501	283.452	-0.00512	250.294	-0.00225	250.319	-0.00519	277.713	-0.03211	277.024		276.939		277.827	0.00509	277.834	-0.00361	276.039
275.17	0.00275	277.074		277.266	0.00362	283.544	0.01913	250.312	-0.018	250.333	0.000799656	277.805	0.0728	277.117		277.031		277.919	-0.00727	277.926	-0.00769	276.131
275.312	0.00439	277.167	0.00681	277.359	0.00512	283.637	0.00967	250.326	9.15914e-05	250.347	0.00477	277.898	-0.00233	277.209	-0.00178	277.124		278.012		278.019		276.224
275.454	0.00473	277.259	-0.000791587	277.492	0.00771	283.73	0.00623	250.34	-0.00161	250.365	0.00186	277.99		277.302	0.01957	277.217	-0.00812	278.104		278.111		276.316
275.595	0.00837	277.352	0.0123	277.592	0.0103	283.822	-0.000883101	250.358	-0.015	250.379	0.00107	278.083		277.395	-0.00527	277.309	-0.01289	278.197	-0.01619	278.204	0.00269	276.409
275.737	0.0093	277.485		277.684	0.00208	283.915	0.00141	250.372	0.01575	250.394	0.00257	278.175	0.00225	277.535	-0.02085	277.402	0.00861	278.289	0.00458	278.296	-0.01036	276.501
275.775	0.01388	277.585	-0.06845	277.777	-0.02623	284.007		250.387	0.03209	250.412	0.00845	278.268	0.02282	277.627	0.04619	277.542	0.00322	278.382	-0.00762	278.389	0.00876	276.594
275.867	0.00131	277.677	0.00935	277.869	0.02042	284.1		250.404	-0.00799	250.426	0.00902	278.361	0.01164	277.72	0.01031	277.635	-0.00605	278.475	0.00362	278.482	-0.00732	276.687
275.96		277.77	-0.00349	277.962		284.192	0.00558	250.419	-0.00121	250.44	0.00826	278.453	0.01054	277.813	0.01283	277.727	-0.01051	278.567	-0.00511	278.574	-0.00275	276.779
276.053		277.862	-0.00231	278.054		284.285	0.0012	250.433	-0.00875	250.458	0.01054	278.546	0.01787	277.905	-0.00247	277.82	-0.02013	278.66	-0.0106	278.667	-0.0092	276.872
276.145		277.955	0.0045	278.147	-0.00369	284.377	-0.00337	250.451	0.00378	250.472	0.00513	278.638	0.003	277.997		277.912	-0.01815	278.752	-0.00444	278.759	0.00103	276.96
276.238		278.047		278.239	0.00726	284.469	0.01238	250.465	0.0098	250.486	0.00397	278.731	-0.00604	278.09		278.005		278.86	-0.01465	278.867	-0.02707	277.053
276.33		278.14	-0.0061	278.332	-0.00936	284.562	0.01307	250.479	-0.00714	250.504	-0.000888844	278.839	-0.0012	278.182	-0.0023	278.097		278.953	-0.00246	278.96		277.145	0.00397
276.423		278.232	-0.0056	278.425	0.00305	284.655	-0.00235	250.497	0.00627	250.518	0.00304	278.931	0.01105	278.275	-0.000262368	278.19	-0.00181	279.045		279.052		277.238	0.00476
276.516		278.325	-0.00365	278.517	0.00839	284.747	-0.01169	250.511	0.00987	250.533	0.03484	279.024		278.368	0.01251	278.282	-0.00174	279.138		279.145		277.331	0.01094
276.608		278.418	-0.00892	278.61	-0.01268	284.84	0.00432	250.525	0.02265	250.55	-0.00685	279.116		278.46	0.0039	278.375	0.00436	279.23		279.237		277.433	0.14862
276.701		278.51	0.00879	278.702	-0.00443	284.932	0.01104	250.543	-0.01142	250.565	-0.10129	279.209		278.553	-0.00162	278.468	0.00193	279.323		279.33		277.563	0.0092
276.793		278.603	0.00403	278.81	-0.01271	285.025		250.558	-0.00417	250.579	-0.00445	279.301		278.645	0.00724	278.56	-0.00447	279.376		279.379		277.656	-0.01526
276.882		278.695	-0.000777443	278.903	0.000347742	285.142	0.00106	250.572		250.597	0.00708	279.366		278.738	0.00374	278.652	-0.01625	279.436	-0.00986	279.439	0.00628	277.749	0.00386
276.974		278.803	0.00134	278.995		285.235	0.00545	250.59	0.00626	250.611	0.00785	279.425	0.01476	278.846	0.00726	278.745	0.00983	279.487	-0.00393	279.49	0.0125	277.841	0.000677929
277.067		278.896	0.00896	279.088		285.327	0.00267	250.604	0.00725	250.625	-0.00315	279.476	0.02803	278.938	-0.00939	278.853	-0.00304	279.537	-0.00851	279.541	-0.00148	277.933	-0.00379
277.16	0.000903553	278.988		279.18		285.42	0.00827	250.618	-0.00409	250.643	0.0067	279.526	-0.01021	279.031		278.945	-0.0113	279.628	-0.02096	279.635	-0.00135	278.026
277.252	-0.00852	279.081		279.273		285.512	-0.00407	250.636	-0.2247	250.657	8.76832e-05	279.606	0.01789	279.123		279.038		279.687	-0.00767	279.691	-0.004	278.118
277.345	0.01692	279.173		279.353		285.605	0.01103	250.65	-0.61246	250.672	-5.61688e-05	279.678	0.01019	279.216		279.13		279.736	0.00272	279.739	-0.000283188	278.211	0.0162
277.478	-0.01055	279.266		279.408	0.00252	285.697	0.01165	250.664	0.00176	250.689	0.00122	279.726	0.01294	279.308		279.223		279.784	-0.01271	279.788	-0.00228	278.397	0.00967
277.578	-0.00637	279.35		279.461	0.00102	285.79	0.00329	250.682	0.00303	250.704	-0.00953	279.774	0.01441	279.369		279.316		279.833	-0.0102	279.836	-0.00203	278.489	-0.00513
277.67	-0.0051	279.406		279.512	0.00749	285.882	-9.84057e-05	250.696	0.000407698	250.718		279.823	0.00629	279.428	-0.03091	279.373		279.931	-0.01191	279.938	0.006	278.581	-0.002
277.763	-0.10007	279.458	0.000747634	279.559	0.00553	285.975		250.711	0.00152	250.736	-0.01025	279.909	-0.01386	279.479	-0.01155	279.433	0.00292	280.024		280.031		278.674	0.000868677
277.855	0.00196	279.508	0.02292	279.578	-0.00222	286.067		250.729	-0.00552	250.75	-0.01069	280.002		279.53	-0.01684	279.484	-0.01197	280.116		280.123		278.766	0.00203
277.948	-0.0125	279.555	-0.01652	279.664	0.00423	286.16	0.00809	250.743	-0.00201	250.764	-0.00555	280.095		279.613	-0.000825336	279.534	0.00079254	280.209	-0.02023	280.216	0.00264	278.874	-0.01064
278.04		279.571	0.00274	279.713	0.0002895	286.252	0.00211	250.757	-0.0031	250.782	-0.0018	280.187	0.00696	279.681	0.000975082	279.621	-0.0037	280.301	-0.02225	280.308	-0.00875	278.967
278.133	-0.0098	279.661	-0.00109	279.761	0.00789	286.345	0.00649	250.775	8.10553e-05	250.796	0.00195	280.28	0.00543	279.729	-0.01146	279.684	-0.02021	280.367	-0.0124	280.37	-0.00264	279.059
278.225	-0.01355	279.709	0.03266	279.81	0.00321	286.437	-0.00794	250.789	-0.1018	250.811	-0.00229	280.357	-0.01416	279.778	0.00249	279.732	0.00562	280.411	-0.00636	280.415	-0.000225949	279.152
278.318	-0.01472	279.758	0.00337	279.858	0.00601	286.53	0.0063	250.803	0.0074	250.828		280.401	-0.0024	279.826	0.00146	279.781	-0.01305	280.457	0.00426	280.46	-0.01537	279.244
278.411	-0.00814	279.807	0.00141	279.881	0.00135	286.622	0.00712	250.821	0.00361	250.843	-0.00401	280.447	-0.000398557	279.917	-0.00244	279.83	0.00625	280.502	-0.02078	280.505	0.00291	279.337
278.503	0.00517	279.855	-0.00114	279.974		286.715	-0.01909	250.835	0.00758	250.857	-0.00544	280.492	0.01612	280.009		279.924	-0.00496	280.581	-0.00262	280.588	-0.01392	279.382
278.596	-0.000284396	279.874	-0.00887	280.066		286.807	-0.00106	250.85	0.0051	250.875	0.00512	280.559	0.00511	280.102		280.016		280.673	-0.01133	280.68	-0.00157	279.443	-0.00068952
278.688	0.000633822	279.966		280.159	-0.0018	286.9	-0.0081	250.867	0.000945681	250.889	0.0082	280.652	0.00596	280.194	-0.00782	280.109		280.789	-0.00707	280.797	-0.00294	279.494	-0.00991
278.796	0.01051	280.059		280.251	0.01527	286.992		250.882	0.16966	250.903	0.0002635	280.768	0.04786	280.287	0.00916	280.201	0.00178	280.878	-0.00749	280.885	-0.01235	279.545	-0.03884
278.888	0.0045	280.152	-0.0058	280.344	0.01299	287.085		250.896	0.00288	250.921	0.00581	280.856	0.00665	280.36	-0.00307	280.294	-0.01111	280.97		280.977		279.642	-0.00203
278.981		280.244	0.00751	280.388	0.02149	287.177	-0.02576	250.914	0.00382	250.935	-0.01213	280.949	0.00336	280.405	0.00819	280.363	-0.01089	281.063		281.07		279.694	0.000300647
279.074		280.34	0.0023	280.433	0.00277	287.27	-0.00683	250.928		250.949	0.003	281.041		280.45	0.00937	280.408	-0.004	281.155	-0.02407	281.162	0.000618745	279.742	0.00844
279.166		280.385	0.00496	280.479	-5.07359e-05	287.362	-0.0084	250.942	-0.0071	250.967		281.134	-0.00946	280.495	-6.68535e-05	280.453	-0.00144	281.248	-0.00849	281.255	-0.01978	279.791	0.00304
279.259		280.43	0.00916	280.531	0.00148	287.455	-0.00523	250.96		250.981		281.226	0.0039	280.566	0.00706	280.498	-0.00275	281.343	-0.00946	281.35	0.00911	279.839	0.00791
279.346		280.475	0.01303	280.623	-0.01429	287.547	-0.008	250.974		250.996		281.321	-0.04632	280.659	-0.02442	280.574	-0.01006	281.435	0.00761	281.442	-0.01772	279.945	0.00259
279.402		280.524	1.7218e-05	280.716	0.01425	287.64	0.00154	250.989		251.014		281.414	-0.01218	280.775	0.00673	280.666	0.01061	281.532	-0.01362	281.539	-0.0169	280.038
279.454	-0.00869	280.616	-0.000611691	280.828	-0.00745	287.732	0.00321	251.006		251.028		281.51	0.01227	280.863	0.00198	280.782	-0.01177	281.626	-0.00228	281.634	0.00697	280.13	-0.01123
279.504	0.0118	280.709	0.03642	280.92	-0.01879	287.825		251.021		251.042		281.603	0.00845	280.956	0.00686	280.871	-0.01209	281.719	-0.00869	281.726	0.00757	280.223	-0.00443
279.551	0.0097	280.821	0.04188	281.013		287.917		251.035		251.06		281.697	0.00857	281.048		280.963		281.867	-0.00499	281.874	-0.0046	280.315	-0.02163
279.564	0.00435	280.913	0.00991	281.105		288.009		251.053		251.074		281.846	0.00813	281.141	0.00273	281.056		281.96		281.967		280.373	-0.00164
279.658	-0.02689	281.006		281.198	-0.01354	288.06		251.067		251.088		281.938	-0.00362	281.233	-0.0245	281.148	-0.000977292	282.052		282.059		280.418	0.00204
279.706	0.01211	281.098		281.29	-0.0129	288.152		251.081		251.106		282.031		281.329	-0.01063	281.241	-0.00529	282.145	-0.00153	282.152	0.00861	280.463	0.0083
279.755	0.00742	281.191	0.02641	281.385	-0.02936	288.245		251.099		251.12		282.123		281.421	0.00325	281.336	-0.01297	282.237	-0.01528	282.29	-0.00322	280.508	0.01391
279.803	0.02828	281.283	0.0246	281.478	-0.01262	288.337		251.113		251.135		282.216	-0.01296	281.517	0.00693	281.428	-0.00214	282.378	-0.01041	282.385	-0.00672	280.595	0.000197463
279.852	-0.00547	281.378	0.02063	281.574	-0.00201	288.43		251.128		251.152		282.357	0.01331	281.612	0.00391	281.524	0.000979998	282.471	-0.01504	282.478	0.0018	280.687	0.00745
279.867	0.0062	281.471	-0.00301	281.669	0.01008	288.522	-0.00226	251.145		251.167		282.449	-0.00176	281.705	0.00652	281.619	-0.00541	282.563	-0.00178	282.57	-0.01084	280.804	0.01819
279.959		281.567	-0.00036917	281.817	0.00893	288.615	0.03635	251.16		251.181		282.542	0.00668	281.853	0.0022	281.712	0.00463	282.656	-0.00876	282.663	0.00149	280.892	0.02449
280.052		281.662	0.00791	281.91	-0.01175	288.707	-0.09229	251.174		251.199		282.634	0.00457	281.946	-0.00963	281.86	0.00564	282.754	0.00387	282.762	8.98154e-06	280.984
280.144	-0.00311	281.81	-0.00316	282.002		288.8	-0.19287	251.192		251.213		282.733	-0.00432	282.038		281.953	0.01126	282.847	-0.00901	282.854	-0.00754	281.077
280.237	-0.01359	281.903	-0.00246	282.095		288.892	0.00751	251.206		251.227		282.826	0.0085	282.131	-0.01847	282.045		282.94	-0.00715	282.947	0.002	281.169	0.00231
280.337	-0.00498	281.995		282.187	-0.01019	288.985		251.22		251.245	0.02277	282.918	0.000223522	282.223	-0.0061	282.138	0.00371	283.032		283.039		281.262	-0.00812
280.382	0.00659	282.088		282.328	-0.01583	289.077		251.238	-0.000457707	251.259	-0.00245	283.011		282.364	0.02539	282.23	0.00677	283.125		283.132	-0.00704	281.357	0.00516
280.427	0.00538	282.18	0.00468	282.421	-1.28995e-05	289.17	-0.00346	251.252	0.00162	251.274	-0.01349	283.103		282.457	0.00751	282.371	-0.00871	283.217	0.00214	283.224	0.00786	281.449	0.00591
280.472	-0.00972	282.321	0.01928	282.513	-0.00188	289.263	-0.00799	251.266		251.291	-0.02357	283.196	0.000942646	282.549	0.00379	282.464	-0.00681	283.31	-0.00854	283.317	0.00842	281.546	-0.0026
280.517	0.00938	282.414	0.0241	282.606	0.00707	289.355		251.284	0.000412474	251.306	-0.00176	283.288	0.00051073	282.642	-0.01881	282.556	0.00155	283.402	-0.01646	283.409	0.01168	281.641	-0.00365
280.609	-0.00307	282.506	-0.00848	282.704	0.01357	289.448	-0.00129	251.299	0.000669184	251.32	0.00651	283.381	0.00337	282.74	0.00259	282.649	-0.00661	283.495	-0.00376	283.502	0.00288	281.881	-0.00642
280.701	0.00302	282.599	0.00182	282.797	0.00952	289.54	0.19706	251.313	0.00117	251.338	0.00441	283.473	-0.05215	282.833	-0.01644	282.747	-0.00275	283.587	-0.00274	283.594	0.01097	281.974
280.814	0.0165	282.697	0.01789	282.89	-0.00777	289.633	-0.00631	251.331	-0.00318	251.352	-0.00197	283.566	0.00859	282.925	0.0019	282.84	-0.00509	283.68	-0.00569	283.687	0.000187109	282.067
280.906	-0.0151	282.79	-0.00772	282.982		289.725	-0.15492	251.345	-0.00106	251.366	-0.00137	283.658	0.00597	283.018		282.932	-0.02297	283.772	0.00741	283.779	-0.0068	282.159	-0.01096
280.999		282.882	0.000793732	283.075		289.818	-0.00156	251.359	0.00302	267.789	0.0073	283.751	0.02157	283.11		283.025		283.865	-0.0098	283.872	0.00121	282.3	0.01673
281.091		282.975		283.167	-0.01747	289.91	0.0235	251.377	-0.00875	267.881	0.00466	283.843	-0.00115	283.203	-0.01311	283.118		283.957	-0.00482	283.965		282.393	-0.0114
281.184	-0.00864	283.068		283.26	-0.03315	290.003		267.781	0.00935	267.974		283.936	0.00383	283.295	0.000958042	283.21	0.000811006	284.05		284.057		282.485	0.01009
281.276	-0.0011	283.16	-0.02359	283.352	-0.00159	290.095		267.874	0.02387	268.066		284.028		283.388	0.01635	283.302	-0.00515	284.142	-0.01474	284.149	0.00315	282.578	-0.00077191
281.371	-0.00662	283.253	-0.00956	283.445	-0.01364	290.199	0.00684	267.967		268.159	0.00146	284.121		283.48	-0.01337	283.395	-0.000621852	284.235	-0.0071	284.242	0.00408	282.67	-0.000726184
281.464	0.01131	283.345	0.00766	283.537	-0.01613	290.292	-0.0138	268.059		268.251	0.01275	284.213	0.00395	283.573	-0.00552	283.488	0.01269	284.327	-0.00311	284.334	0.00917	282.769	-0.00914
281.56	0.02215	283.438	0.01459	283.63	-0.01486	290.398	-0.00030672	268.152	0.00149	268.344	0.00205	284.306	0.01121	283.665	0.00155	283.58	0.01161	284.42	-0.01238	284.427	0.0012	282.861	0.00346
281.655	-0.00334	283.53	0.0154	283.722	0.00784	290.49	0.04577	268.244	0.0078	268.485	0.00209	284.398	0.00359	283.758	-0.00118	283.673	0.00163	284.512	-0.00511	284.519	-0.000860451	282.954	-0.01531
281.803	-0.01587	283.623	0.00584	283.815	-0.00553	290.583	0.14789	268.337	0.00284	268.58	-0.0018	284.491	0.04001	283.851	-0.00537	283.765	-0.00678	284.605	0.0033	284.612	0.00885	283.046
281.896	0.00355	283.715	0.0147	283.907	-0.01194	290.676	-0.29969	268.478	-0.00594	268.673	-0.00111	284.583	0.00958	283.943	-0.01045	283.858	-0.00377	284.697	-0.0097	284.704	-0.0083	283.139	-0.00809
281.988		283.808	0.00193	284		290.768	-0.02446	268.573	-0.00166	268.765	-0.0068	284.676	-0.01477	284.036		283.95	-0.00178	284.79	-0.00497	284.797	0.01053	283.231	-0.00541
282.081		283.9	0.01849	284.092		290.861	0.00985	268.666	-0.0242	268.858	0.00698	284.768	0.00908	284.128	0.00125	284.043		284.882	-0.00604	284.889	0.01021	283.324	-0.00383
282.173	-0.02496	283.993		284.185	0.01163	290.953	0.00117	268.758	-0.01489	268.951	0.000230658	284.861	0.02514	284.221	0.000847726	284.135	0.00374	284.975		284.982		283.416	-0.00101
282.314	-0.00647	284.085		284.277	0.01285	291.046		268.851	0.01247	269.043		284.953	0.01257	284.313	0.00936	284.228	-0.000529845	285.067		285.074		283.509	0.000707217
282.407	-0.0089	284.178	0.00332	284.37	0.01274	291.138	-0.00841	268.943	0.00525	269.136	0.01626	285.046		284.406	0.06984	284.32	-0.01613	285.185	-0.00883	285.192	-0.01008	283.601	-0.01034
282.499	0.01202	284.27	0.00231	284.462	0.04923	291.231	-0.00622	269.036		269.228	0.01612	285.164	0.00631	284.498	-0.00712	284.413	0.0254	285.277	0.00413	285.285	0.00413	283.694	0.000245082
282.592	0.01979	284.363	-0.01708	284.555	-0.01028	291.389	-0.01206	269.129	0.00203	269.321	0.01665	285.256	0.01283	284.591	0.004	284.505	0.02231	285.37	0.01072	285.377	0.01778	283.787	-0.02162
282.69	0.00361	284.455	0.05902	284.647	0.000156415	291.482	0.00636	269.221	-0.00304	269.413	-0.00571	285.349	0.00149	284.683	0.01587	284.598	0.02001	285.462	0.000637549	285.47	0.000548545	283.879	0.00743
282.783	0.00714	284.548	0.00321	284.74	-9.14804e-05	291.574	0.000841687	269.314	-0.00105	269.506	-0.000680484	285.441	0.03211	284.776	-0.00814	284.69	-0.00818	285.555	0.02226	285.562	0.00576	283.972
282.875	-0.02173	284.64	-0.00155	284.832	-0.0162	291.667	-0.01216	269.406	-0.000545923	269.599	0.02827	285.534	0.02414	284.868	0.00905	284.783	-0.00911	285.648	-0.01979	285.655	0.00493	284.064
282.968		284.733	-0.00913	284.925	0.00643	291.759	0.01357	269.499	0.01176	269.691	0.00253	285.626	0.01168	284.961		284.875	0.00446	285.74	-0.00245	285.747	-0.00849	284.157	-0.01604
283.061		284.825	0.00416	285.017		291.852	-0.000175573	269.591	-0.02979	269.803	0.00759	285.719	-0.00106	285.053		284.968		285.833	-0.01497	285.84	-0.00361	284.249	-0.00176
283.153	-0.01166	284.918	0.01048	285.135	0.000778549	291.944	0.000969619	269.684	0.0021	269.896	0.03025	285.811	0.02	285.171	-0.00311	285.06		285.925	-0.00212	285.932	0.00165	284.342	0.006
283.246	-0.02523	285.01		285.228	0.012	292.037		269.796	-0.0141	269.988		285.904	-3.20395e-05	285.263	0.00283	285.178	-0.00364	286.018		286.025		284.434	0.00544
283.338	-0.00493	285.103		285.32	0.00372	292.129	-0.00943	269.888	-0.01122	270.081		285.996		285.356	-0.000635936	285.27	0.00346	286.11		286.117		284.527	-0.00534
283.431	-0.00108	285.128	0.00609	285.413	0.00604	292.222	-0.00257	269.981		270.173	0.02409	286.089		285.448	-0.00199	285.363	-0.00326	286.203	-0.02109	286.21	0.00608	284.619	0.01777
283.523	0.00279	285.22	0.00666	285.505	-0.01692	292.314	0.00368	270.074		270.266	0.00942	286.181	0.00876	285.541	-0.00195	285.455	0.02243	286.295	-0.000858641	286.302	0.00185	284.712	-0.000582869
283.616	-0.00957	285.313	-0.000614438	285.598	-0.000360383	292.407	0.00311	270.166	0.00735	270.358	0.01042	286.274	-0.01803	285.633	-0.00417	285.548	0.0212	286.388	0.01161	286.395	0.00103	284.804	0.01197
283.708	0.000848381	285.405	0.01997	285.69	-0.00017985	292.499	-0.000670805	270.259	0.02282	270.451	0.00931	286.366	0.02093	285.726	-0.00203	285.64	-0.00907	286.48	-0.01716	286.487	0.01596	284.897	0.01228
283.801	0.000239049	285.498	-0.00846	285.783	0.01869	292.591	-0.11567	270.351	0.01455	270.544	-0.00133	286.459	0.01449	285.818	0.01023	285.733	-0.01301	286.573	0.02634	286.58	0.01184	284.989
283.893	-0.000737354	285.591	-0.10585	285.875	-0.000227415	292.684	-0.01569	270.444	-0.01037	270.636	0.00233	286.551	0.04555	285.911	0.00477	285.826	-0.01094	286.665	-0.18589	286.672	-0.00674	285.082
283.986		285.683	-0.00623	285.968		292.776	-0.00056772	270.536	-0.0111	270.729	-0.00497	286.644		286.003		285.918	0.00316	286.758	-0.00312	286.765	-0.0055	285.199	0.00379
284.078		285.776	0.0081	286.06		292.869	-0.00514	270.629	0.13117	271.425	0.00392	286.736		286.096		286.011		286.85	-0.00777	286.857	-0.00126	285.292	-0.01605
284.171	-0.00151	285.868	0.00882	286.153	0.00217	292.961		270.722	-0.00968	271.517	0.00441	286.829	0.00227	286.188	0.01408	286.103		286.943	-0.02109	286.95	0.01308	285.384	-0.00336
284.263	-0.00866	285.961		286.245	0.00734	293.054		271.418	0.00264	271.61	-0.00217	286.921	0.03812	286.281	-0.01182	286.196	0.00407	287.035		287.042		285.477	-0.00263
284.356	0.01304	286.053		286.338	0.01507	293.146	0.00365	271.51	-0.02051	271.702	-0.008	287.014		286.373	-0.00239	286.288	-0.00383	287.128	-0.01692	287.135	0.01014	285.569	-0.08624
284.448	0.00493	286.146	0.000741261	286.43	0.00136	293.239	-0.01633	271.603	-0.00122	271.795	0.01357	287.106		286.466	0.00956	286.38	0.022	287.22	-0.00338	287.227	0.0029	285.662	0.003
284.541	0.00483	286.238	0.00122	286.523	-0.01029	293.331	0.01951	271.695	-0.01189	271.887	-0.01642	287.199	0.02191	286.558	0.01222	286.473	0.02306	287.313	-0.01975	287.32	0.01291	285.754	-0.00728
284.633	-0.00828	286.331	-0.01061	286.615	-0.01034	293.424	0.00601	271.788	0.01219	271.98		287.291	0.00294	286.651	-0.01146	286.565	0.000429078	287.405	0.01321	287.412	0.00227	285.847	0.00615
284.726	-0.01941	286.423	0.01295	286.708	-0.00489	293.516	-0.00494	271.88	0.00389	272.073		287.384	0.00811	286.743	-0.00422	286.658	0.00101	287.498	-0.02519	287.505	0.00201	285.939	0.00136
284.818	0.00679	286.516	0.00718	286.8	-0.01535	293.609	0.01214	271.973		272.165	0.00326	287.476	-0.00649	286.836	-0.00359	286.751	-0.01021	287.59	-0.10148	287.597	0.00845	286.032
284.911	0.000572067	286.608	-0.05503	286.893	0.00252	293.701	0.00462	272.065		272.258	0.00321	287.569		286.928	-0.00305	286.843	-0.01319	287.682	0.01304	287.689	0.02113	286.124
285.003		286.701	0.0175	286.985		293.794	-0.01236	272.158	0.000745734	272.35	-0.0013	287.661	-0.00428	287.021		286.936	0.00262	287.775	-0.0176	287.782	0.0081	286.217	-0.00657
285.096		286.793	-0.00289	287.078		293.886	-0.00457	272.251	0.01883	272.443	-0.00477	287.753	0.02046	287.113		287.028		287.867		287.874		286.309	0.0047
285.121		286.886	0.01874	287.17	0.01664	293.978		272.343	-9.71133e-05	272.535	0.00186	287.846		287.206	0.01316	287.12		287.96		287.967		286.402	0.01347
285.213	-0.00833	286.978		287.263	-0.00532	294.071		272.436	-0.00785	272.628	-0.00401	287.938		287.298	0.00305	287.213	0.00912	288.102		288.109		286.494	-0.00201
285.306	0.0025	287.071		287.355	0.01918	294.163	-0.01065	272.528	-0.01793	272.721	0.000128996	288.081		287.391	-0.000776196	287.305	-0.0054	288.195		288.202		286.587	-0.00432
285.398	0.01421	287.163	-0.01588	287.448	0.01366	294.256	-0.01471	272.621	0.01577	272.813	-0.003	288.173		287.483	0.00173	287.398	-0.02016	288.287		288.294		286.679	-0.08729
285.491	0.02803	287.255	-0.00654	287.54	-0.00144	294.348	-0.01344	272.713	-0.00857	272.906	-0.01653	288.266		287.576	-0.000332047	287.49	0.00893	288.38		288.387		286.772	0.0037
285.583	-0.00876	287.348	0.00726	287.633	0.00594	294.441	-0.00496	272.806	-0.00447	272.998		288.358		287.668	-0.00773	287.583	-0.00715	288.472		288.48		286.864	-0.0056
285.676	0.00314	287.441	0.01042	287.725	-0.000196942	294.533	0.00106	272.899	-0.00376	273.091		288.451		287.761	0.02272	287.675	-0.00693	288.565	-0.0213	288.572	-0.01888	286.957	0.00459
285.769	-0.01161	287.533	-0.07698	287.817		294.625	0.00304	272.991		273.183	-0.00745	288.544		287.853		287.768	-0.01132	288.657	-0.15802	288.665	-0.000845575	287.049
285.861	0.00906	287.625	-0.05182	287.91		294.718	-0.01031	273.084		273.276	0.0092	288.636	-0.01655	287.945		287.86		288.75	0.0298	288.757	-0.13655	287.142	-0.00878
285.954	-0.00888	287.718	-0.00391	288.002		294.81	0.01897	273.176	0.01412	273.368	0.00855	288.729	0.03006	288.088		287.953		288.843	-0.16427	288.85	-0.00612	287.234	0.00662
286.046		287.81		288.052		294.903	-0.01003	273.268	0.01403	273.461	0.00353	288.821	-0.18142	288.181		288.095		288.935	-0.0037	288.942	-0.00639	287.327	-0.01927
286.139	-0.01109	287.903		288.145		294.995		273.361	-0.01595	273.553	0.01207	288.914	0.02325	288.273		288.188		289.028		289.035		287.419	-0.0138
286.231	-0.00238	287.995		288.237		295.088		273.454	-0.01201	273.645	0.00676	289.006		288.366		288.28		289.12		289.127	-0.00436	287.512
286.324	0.00478	288.045		288.33		295.18	0.02442	273.546	0.01255	273.737	0.009	289.099		288.458		288.373		289.213	-0.01151	289.22	-0.00854	287.604	-0.02208
286.416	-0.0089	288.138		288.423		295.272	0.01821	273.637	0.12938	273.83	0.0345	289.191	0.01369	288.551	0.00897	288.465		289.305	-0.02438	289.312	0.00335	287.697	-0.12388
286.508	-0.00973	288.23		288.515	-0.0185	295.365	0.02161	273.73	0.00912	273.922	0.01811	289.284	0.00784	288.643	-0.02161	288.558	0.0088	289.398	0.02235	289.405	0.0193	287.789	0.00649
286.601	-0.01021	288.323		288.608	-0.06353	295.457	0.0119	273.823	0.03347	274.015		289.376	-0.02785	288.736	-0.11292	288.65		289.49	0.00553	289.498	-0.03738	287.881
286.694	-0.01384	288.415		288.7	-0.06395	295.55	0.000617441	273.915	0.01251	274.107		289.469	0.016	288.828	0.01183	288.743	-0.03556	289.583	-0.06821	289.59		287.974
286.786	-0.01066	288.508	0.00168	288.793	0.0789	295.642	0.00683	274.008		274.2	0.00841	289.561	-0.03165	288.921	0.01596	288.835	-0.01476	289.675	0.00327	289.683	-0.09027	288.117
286.879	-0.00834	288.6	0.16624	288.885	-0.18237	295.735	-0.01827	274.1		274.293	0.00283	289.654	0.02389	289.013		288.928	-0.02641	289.768	-0.00407	289.775	-0.01034	288.209
286.971		288.693	-0.04067	288.978		295.827	0.00564	274.193	0.00218	274.385	0.00879	289.746	-0.18459	289.106		289.021		289.86	-0.00945	289.868	-0.00063216	288.302
287.063		288.785	-0.01091	289.07		295.92	0.02358	274.286	0.00445	274.456	0.0263	289.839	0.01504	289.199	0.01254	289.113		289.953	0.01194	289.96		288.394
287.156	-0.00942	288.878	0.00119	289.163	0.01711	296.012		274.378	-0.01647	274.549	0.0033	289.931	0.02702	289.291	0.00184	289.206	-0.00619	290.045		290.053		288.487	-0.00108
287.248	-0.016	288.971		289.255	0.01319	296.116		274.449	0.00809	274.641	-0.01985	290.024		289.384	0.01343	289.298	-0.00864	290.138	-0.00959	290.157	0.00525	288.579	-0.01104
287.341	-0.0179	289.063		289.348	0.02573	296.208	0.0201	274.542	0.00894	274.79	0.00745	290.117		289.476	0.10191	289.391	-0.06961	290.242	-0.004	290.249	0.01151	288.672	-0.17575
287.433	-0.00409	289.156	-0.00441	289.441	-0.00415	296.301	0.0233	274.634	-0.00212	274.931	0.00707	290.221	0.00791	289.569	0.01855	289.483	-0.01193	290.348	0.000337425	290.355	0.00872	288.764	0.11706
287.526	-0.01349	289.248	0.0034	289.533	-0.03721	296.393	0.00425	275.803	-0.01466	275.073		290.327	0.03504	289.661		289.576	-0.013	290.441	-0.1313	290.448	-0.00685	288.857	0.00902
287.618	-0.00683	289.341	-3.11619e-05	289.625	-0.24821	296.486	0.01513	275.896	0.00443	275.215	0.00306	290.419	0.01737	289.754	-0.01534	289.668	-0.01722	290.533	0.00784	290.54	-0.03313	288.949	-0.0563
287.711	-0.00532	289.433	-0.14867	289.718	0.00755	296.578	0.01449	275.989		275.357	0.00498	290.512	0.00527	289.846	0.00239	289.761	0.01604	290.626	-0.16882	290.633	-0.07982	289.042
287.803		289.526	-0.00901	289.811	0.01131	296.671	0.03081	276.081		275.498	0.00441	290.604	-0.16622	289.939	0.01192	289.853	0.00728	290.718	-0.09504	290.725	-0.0523	289.135	0.03373
287.896		289.618		289.903	-0.000852995	296.763	0.01724	276.174		275.64	0.00594	290.697	0.02908	290.031		289.946	-0.01242	290.811	-0.00118	290.818	0.000686062	289.227	-0.000608411
287.988		289.711	0.0114	289.996		296.856	0.02637	276.266		275.81	0.00986	290.789	0.0365	290.124		290.038		290.903	-0.01874	290.911	0.00351	289.32	-0.00268
288.038		289.803	0.0134	290.088		296.948	0.01246	276.359		275.903	0.00993	290.882	0.01448	290.228	0.00635	290.131	0.0075	290.996		291.003		289.412	0.00697
288.131		289.896	0.01392	290.192	0.00776	297.041		276.452		275.996		290.975		290.334	0.01825	290.235	0.00119	291.088		291.096		289.505	0.01152
288.223		289.988		290.285	0.01653	297.133	0.0169	276.544		276.088		291.067		290.426	0.0042	290.341	-0.01376	291.181	-0.00957	291.188	0.00346	289.597	-0.05139
288.316		290.081		290.391	0.03437	297.226	-0.00102	276.637		276.181		291.16	0.01354	290.519	-0.01417	290.434	0.01073	291.273	-0.02202	291.281	0.02129	289.69	0.02565
288.408		290.185	-0.00483	290.483	-0.00114	297.318	0.01182	276.729		276.273		291.252	0.00751	290.612	0.00264	290.526	-0.00538	291.34	-0.01576	291.347	0.0068	289.782	0.01927
288.501	4.55165e-05	290.277	0.0232	290.576		297.411	0.01824	276.822		276.366		291.318	0.02095	290.704	0.01322	290.619	-0.00361	291.432	-0.02064	291.439	-0.01548	289.875	0.01193
288.593	0.07719	290.384	0.01958	290.668	0.00436	297.503	0.02195	276.91		276.459		291.411	0.01443	290.797	0.00142	290.711	-0.01021	291.525	0.00784	291.532		289.967
288.686	-0.1104	290.476	-0.198	290.761	0.01083	297.596	0.04259	277.003		276.551		291.503	-0.07179	290.889	-0.00472	290.804	-0.00986	291.617	-0.02664	291.624	-0.20076	290.06
288.778	-0.22201	290.569	-0.24907	290.853	0.01941	297.688	0.02558	277.096		276.644		291.596	0.0056	290.982		290.896	-0.0056	291.709	0.0461	291.717	-0.00889	290.164	0.01548
288.871	-0.00501	290.661	-0.05824	290.946	0.00278	297.781	0.02354	277.188	-0.00764	276.736		291.688	0.04925	291.074		290.989		291.802	0.00431	291.809	-0.01106	290.256	0.01667
288.964		290.754	-0.12634	291.039		297.873	0.01556	277.281	0.01625	276.829		291.781	0.01481	291.167	0.01679	291.081		291.894	-0.03298	291.901	0.02004	290.363	0.02044
289.056		290.846	0.00207	291.131	0.000506719	297.966		277.373	0.01848	276.917		291.873	0.01597	291.259	-0.0084	291.174	-0.00621	291.987		291.994		290.455	-0.10857
289.149	-0.00362	290.939	0.02377	291.224	0.02032	298.058		277.514	0.02638	277.01		291.965		291.325	-0.000195447	291.266	-0.01192	292.079		292.087		290.548	0.01303
289.241	-0.00474	291.031		291.382	0.01025	298.151	0.01047	277.606	0.0202	277.103		292.058		291.418	0.03744	291.332	-0.00722	292.172	-0.0044	292.179	0.02373	290.64
289.334	-0.000937961	291.124		291.475	-0.00734	298.243	0.01548	277.699	0.01074	277.195	0.00553	292.151	0.02744	291.51	0.02817	291.425	-0.000109683	292.264	-0.0034	292.271	0.00901	290.733
289.426	-0.00861	291.216	0.00553	291.567	-0.03565	298.336		277.791	-0.02504	277.288	0.004	292.243	0.02335	291.603		291.517	0.14797	292.357	-0.00792	292.364	0.00238	290.825	-0.0224
[truncated: 835 more rows]

## Sheet: C4H8O
DoY S1.1	C4H8O flux S1.1	DoY S1.2	C4H8O flux S1.2	DoY S1.3	C4H8O flux S1.3	DoY S2.1	C4H8O flux S2.1	DoY S2.2	C4H8O flux S2.2	DoY S2.3	C4H8O flux S2.3	DoY S3.1	C4H8O flux S3.1	DoY S3.2	C4H8O flux S3.2	DoY S3.3	C4H8O flux S3.3	DoYS4.1	C4H8O flux S4.1	DoY S4.2	C4H8O flux S4.2	DoY S4.3	C4H8O flux S4.3
[truncated: 1,122 more rows]

[truncated: 11 more sheets: C4H10S, C5H8O, C5H10O, DMS, Ethanol, Isoprene, MACR_MVK, Methanethiol, Methanol, Methyl nitrite, Monoterpenes]
